# Supplementary material
Source: PubMed Central journal article supplement (PMC3014648)
Supplement: NIHMS237282-supplement-1.pdf [file NIHMS237282-supplement-1.pdf]

# Association analyses of 249,796 individuals reveal eighteen new loci associated with body mass index

Elizabeth K. Speliotes, Cristen J. Willer, Sonja I. Berndt, Keri L. Monda, Gudmar Thorleifsson *et al.* \*

\*A full list of author names appears in the main paper.

---

## SUPPLEMENTARY INFORMATION

---

|                                            |              |
|--------------------------------------------|--------------|
| <b>1. SUPPLEMENTARY TABLES AND FIGURES</b> | <b>P. 2</b>  |
| 1.1. Supplementary Tables                  | p. 3         |
| 1.2. Supplementary Figures                 | p. 14        |
| <br>                                       |              |
| <b>2. SUPPLEMENTARY NOTE</b>               | <b>P. 28</b> |
| 2.1. Description of secondary analyses     | p. 29        |
| 2.2. Supplementary note – tables           | p. 38        |
| 2.3. Supplementary note – figure           | p. 95        |
| 2.4. Authors contribution                  | p. 97        |
| 2.5. Acknowledgements                      | p. 101       |
| 2.6. Competing interests statement         | p. 111       |

## 1. SUPPLEMENTARY TABLES AND FIGURES

### 1.1. SUPPLEMENTARY TABLES

|                                                                                                                                                                                                                                                                                                                             |              |
|-----------------------------------------------------------------------------------------------------------------------------------------------------------------------------------------------------------------------------------------------------------------------------------------------------------------------------|--------------|
| <b>Supplementary Table 1</b> The 42 SNPs, associated with BMI at $P < 5.10^{-6}$ at stage 1, that were taken forward for replication in stage 2.                                                                                                                                                                            | <b>p. 3</b>  |
| <b>Supplementary Table 2</b> Association of 32 replicated SNPs with other anthropometric traits.                                                                                                                                                                                                                            | <b>P. 4</b>  |
| <b>Supplementary Table 3</b> Association between 32 replicated SNPs with risk of extreme obesity in children and adults, and with BMI in population-based childhood studies.                                                                                                                                                | <b>P. 5</b>  |
| <b>Supplementary Table 4</b> Association of the 32 confirmed BMI SNPs with metabolic traits.                                                                                                                                                                                                                                | <b>P. 6</b>  |
| <b>Supplementary Table 5</b> Gene set enrichment analysis (MAGENTA) of biological pathways with one or more genes from the 32 confirmed BMI loci, using the BMI meta-analysis.                                                                                                                                              | <b>p. 7</b>  |
| <b>Supplementary Table 6</b> Non-synonymous or splice-site variants in linkage disequilibrium ( $r^2 > 0.75$ ) with lead SNPs.                                                                                                                                                                                              | <b>P. 10</b> |
| <b>Supplementary Table 7</b> Significant associations between BMI SNPs and <i>cis</i> gene expression ( <i>cis</i> -eQTLs) in lymphocyte, blood, adipose and brain tissues.                                                                                                                                                 | <b>P. 11</b> |
| <b>Supplementary Table 8</b> Estimated number of BMI loci for each of the effect sizes observed in Stage 2 for the SNPs that reached a genome-wide significance of $5 \times 10^{-8}$ in the joint analysis of stage 1 and stage 2, given the power to detect the association in the joint analysis of stage 1 and stage 2. | <b>p. 13</b> |

Supplementary Table 1 - The 42 SNPs, associated with BMI at  $P < 5 \times 10^{-6}$  at stage 1, that were taken forward for replication in stage 2.

| Best Ranking SNP Results |            |     |               |         |       |                    |             |         |          | Lead SNP Results                      |               |      |                    |             |         |       |                             |               |           |         |          |         |          |                   |           |
|--------------------------|------------|-----|---------------|---------|-------|--------------------|-------------|---------|----------|---------------------------------------|---------------|------|--------------------|-------------|---------|-------|-----------------------------|---------------|-----------|---------|----------|---------|----------|-------------------|-----------|
|                          |            |     |               |         |       |                    |             |         |          | Heterogeneity between Stage 1 samples |               |      |                    |             |         |       |                             |               |           |         |          |         |          |                   |           |
| Nearest Gene             | SNP        | Chr | Position (bp) | Alleles |       | Imputation quality |             | Stage 1 |          | SNP                                   | Position (kb) | SNP  | Imputation quality |             | Alleles |       | Frequency effect allele (%) | between-study |           | Stage 1 |          | Stage 2 |          | Stage 1 + Stage 2 |           |
|                          |            |     |               | Effect  | Other | r.sq-hat           | Proper-info | n       | P value  |                                       |               |      | r.sq-hat           | Proper-info | Effect  | Other |                             | (P-value)     | (P-value) | n       | P-value  | n       | P-value  | n                 | P-value   |
| FTO                      | rs1558902  | 16  | 52,361,075    | a       | t     | 0.96               | 0.98        | 123,846 | 2.05E-62 | rs1558902                             | 52,361,075    | -    | 0.96               | 0.98        | a       | t     | 42%                         | 0.03          | 0.58      | 123,846 | 2.05E-62 | 68,498  | 1.01E-60 | 192,344           | 4.75E-120 |
| TMEM18                   | rs2860323  | 2   | 604,210       | g       | a     | 0.99               | 0.99        | 116,780 | 2.42E-22 | rs2867125                             | 612,827       | 1.00 | 1.00               | 1.00        | c       | t     | 83%                         | 0.97          | 0.21      | 123,833 | 4.93E-22 | 73,973  | 4.42E-30 | 197,806           | 2.77E-49  |
| MC4R                     | rs6567160  | 18  | 55,980,115    | c       | t     | 0.95               | 0.98        | 123,864 | 1.82E-22 | rs571312                              | 55,990,749    | 1.00 | 0.96               | 0.98        | a       | c     | 24%                         | 0.04          | 0.35      | 123,812 | 2.14E-22 | 79,788  | 3.19E-21 | 203,600           | 6.43E-42  |
| GNPDA2                   | rs10938397 | 4   | 44,877,284    | g       | a     | 0.88               | 0.91        | 123,849 | 4.35E-17 | rs10938397                            | 44,877,284    | -    | 0.88               | 0.91        | g       | a     | 43%                         | 0.46          | 0.89      | 123,849 | 4.35E-17 | 73,160  | 1.45E-15 | 197,008           | 3.78E-31  |
| BDNF                     | rs10767664 | 11  | 27,682,562    | a       | t     | 0.99               | 0.99        | 123,865 | 5.53E-13 | rs10767664                            | 27,682,562    | -    | 0.99               | 0.99        | a       | t     | 78%                         | 0.73          | 0.66      | 123,865 | 5.53E-13 | 80,293  | 1.17E-14 | 204,158           | 4.69E-26  |
| SEC16B                   | rs543874   | 1   | 176,156,103   | g       | a     | 0.98               | 0.99        | 123,863 | 1.66E-13 | rs543874                              | 176,156,103   | -    | 0.98               | 0.99        | g       | a     | 19%                         | 0.77          | 0.01      | 123,863 | 1.66E-13 | 55,551  | 2.41E-11 | 179,414           | 3.56E-23  |
| NEGR1                    | rs2815752  | 1   | 72,585,028    | a       | g     | 0.97               | 0.97        | 123,849 | 1.17E-14 | rs2815752                             | 72,585,028    | -    | 0.97               | 0.97        | a       | g     | 61%                         | 0.03          | 0.26      | 123,849 | 1.17E-14 | 74,531  | 2.29E-09 | 198,380           | 1.61E-22  |
| RBJ                      | rs10182181 | 2   | 25,003,800    | g       | a     | 0.97               | 0.97        | 123,745 | 1.80E-07 | rs713586                              | 25,011,512    | 0.94 | 0.95               | 0.96        | c       | t     | 47%                         | 0.57          | 0.02      | 123,718 | 2.51E-07 | 107,030 | 1.44E-16 | 230,748           | 6.17E-22  |
| GPRC5B                   | rs12444979 | 16  | 19,841,101    | c       | t     | 0.97               | 0.98        | 123,865 | 4.20E-11 | rs12444979                            | 19,841,101    | -    | 0.97               | 0.98        | c       | t     | 87%                         | 0.44          | 0.78      | 123,865 | 4.20E-11 | 115,850 | 8.13E-12 | 239,715           | 2.91E-21  |
| SH2B1                    | rs7498665  | 16  | 28,790,742    | g       | a     | 0.96               | 0.99        | 123,620 | 1.75E-10 | rs7359397                             | 28,793,160    | 1.00 | 0.96               | 0.99        | t       | c     | 40%                         | 0.85          | 0.30      | 123,864 | 2.41E-10 | 80,445  | 7.89E-12 | 204,309           | 1.88E-20  |
| TFAP2B                   | rs987237   | 6   | 50,911,009    | g       | a     | 0.98               | 0.98        | 123,860 | 5.97E-16 | rs987237                              | 50,911,009    | -    | 0.98               | 0.98        | g       | a     | 18%                         | 0.29          | 0.25      | 123,860 | 5.97E-16 | 71,916  | 2.40E-06 | 195,776           | 2.90E-20  |
| MAP2K5                   | rs2241423  | 15  | 65,873,892    | g       | a     | 1.00               | 1.00        | 123,835 | 1.15E-10 | rs2241423                             | 65,873,892    | -    | 1.00               | 1.00        | g       | a     | 78%                         | 0.68          | 0.76      | 123,835 | 1.15E-10 | 104,115 | 1.59E-09 | 227,950           | 1.19E-18  |
| ETV5                     | rs9816226  | 3   | 187,317,193   | t       | a     | 0.96               | 0.98        | 123,859 | 7.61E-14 | rs9816226                             | 187,317,193   | -    | 0.96               | 0.98        | t       | a     | 82%                         | 0.78          | 0.42      | 123,859 | 7.61E-14 | 72,362  | 1.15E-06 | 196,221           | 1.69E-18  |
| FAIM2                    | rs7138803  | 12  | 48,533,735    | a       | g     | 0.96               | 0.99        | 123,799 | 3.96E-11 | rs7138803                             | 48,533,735    | -    | 0.96               | 0.99        | a       | g     | 38%                         | 0.94          | 0.66      | 123,799 | 3.96E-11 | 76,265  | 7.82E-08 | 200,064           | 1.82E-17  |
| QPCTL                    | rs2287019  | 19  | 50,894,012    | c       | t     | 0.78               | 0.89        | 100,473 | 3.18E-07 | rs2287019                             | 50,894,012    | -    | 0.78               | 0.89        | c       | t     | 80%                         | 0.95          | 0.22      | 100,473 | 3.18E-07 | 94,091  | 1.40E-10 | 194,564           | 1.88E-16  |
| TNNI3K                   | rs1514177  | 1   | 74,763,990    | c       | g     | 0.98               | 0.99        | 123,852 | 1.36E-09 | rs1514175                             | 74,764,232    | 1.00 | 0.99               | 1.00        | a       | g     | 43%                         | 0.002         | 0.11      | 123,835 | 1.41E-09 | 104,065 | 7.04E-06 | 227,900           | 8.16E-14  |
| SLC39A8                  | rs13107325 | 4   | 103,407,732   | t       | c     | 0.83               | 0.88        | 123,348 | 1.37E-07 | rs13107325                            | 103,407,732   | -    | 0.83               | 0.88        | t       | c     | 7%                          | 0.67          | 0.19      | 123,348 | 1.37E-07 | 122,030 | 1.93E-07 | 239,378           | 1.50E-13  |
| FLJ35779                 | rs2112347  | 5   | 75,050,998    | t       | g     | 0.97               | 0.99        | 123,863 | 4.76E-08 | rs2112347                             | 75,050,998    | -    | 0.97               | 0.99        | t       | g     | 63%                         | 0.71          | 0.22      | 123,863 | 4.76E-08 | 107,866 | 8.29E-07 | 231,729           | 2.17E-13  |
| LRRN6C                   | rs10968576 | 9   | 28,404,339    | g       | a     | 0.98               | 0.99        | 123,861 | 1.88E-08 | rs10968576                            | 28,404,339    | -    | 0.98               | 0.99        | g       | a     | 31%                         | 0.23          | 0.65      | 123,861 | 1.88E-08 | 93,055  | 3.19E-06 | 216,916           | 2.65E-13  |
| MTCH2                    | rs3817334  | 11  | 47,607,569    | t       | c     | 0.99               | 1.00        | 123,815 | 4.79E-11 | rs3817334                             | 47,607,569    | -    | 0.99               | 1.00        | t       | c     | 41%                         | 0.04          | 0.52      | 123,815 | 4.79E-11 | 68,128  | 1.10E-03 | 191,943           | 1.59E-12  |
| TMEM160                  | rs3810291  | 19  | 52,260,843    | a       | g     | 0.78               | 0.87        | 119,531 | 1.04E-07 | rs3810291                             | 52,260,843    | -    | 0.78               | 0.87        | a       | g     | 67%                         | 0.86          | 0.13      | 119,531 | 1.04E-07 | 113,981 | 1.59E-06 | 233,512           | 1.64E-12  |
| FANCL                    | rs887912   | 2   | 59,156,381    | t       | c     | 0.99               | 0.99        | 123,855 | 2.69E-06 | rs887912                              | 59,156,381    | -    | 0.99               | 0.99        | t       | c     | 29%                         | 0.32          | 0.99      | 123,855 | 2.69E-06 | 118,952 | 1.72E-07 | 242,807           | 1.79E-12  |
| NRXN3                    | rs10150332 | 14  | 79,006,717    | c       | t     | 0.99               | 0.99        | 123,865 | 2.03E-07 | rs10150332                            | 79,006,717    | -    | 0.99               | 0.99        | c       | t     | 21%                         | 0.19          | 0.44      | 123,865 | 2.03E-07 | 59,157  | 2.86E-05 | 183,022           | 2.75E-11  |
| CADM2                    | rs7640855  | 3   | 85,956,854    | a       | g     | 0.98               | 0.99        | 123,866 | 9.81E-08 | rs13078807                            | 85,966,840    | 1.00 | 0.97               | 0.99        | g       | a     | 20%                         | 0.009         | 0.12      | 123,808 | 1.06E-07 | 113,596 | 5.32E-05 | 237,404           | 3.94E-11  |
| PRKD1                    | rs11847697 | 14  | 29,584,863    | t       | c     | 0.85               | 0.95        | 119,851 | 1.11E-08 | rs11847697                            | 29,584,863    | -    | 0.85               | 0.95        | t       | c     | 4%                          | 0.82          | 0.69      | 119,851 | 1.11E-08 | 121,816 | 2.25E-04 | 241,667           | 5.76E-11  |
| LRP1B                    | rs2890652  | 2   | 142,676,401   | c       | t     | 0.94               | 0.97        | 123,855 | 2.38E-07 | rs2890652                             | 142,676,401   | -    | 0.94               | 0.97        | c       | t     | 18%                         | 0.90          | 0.81      | 123,855 | 2.38E-07 | 85,213  | 9.47E-05 | 209,068           | 1.35E-10  |
| PTBP2                    | rs11165643 | 1   | 96,696,685    | t       | c     | 0.98               | 0.99        | 123,861 | 7.65E-07 | rs1555543                             | 96,717,385    | 1.00 | 0.99               | 0.99        | c       | a     | 59%                         | 0.37          | 0.45      | 123,856 | 7.81E-07 | 119,157 | 4.48E-05 | 243,013           | 3.68E-10  |
| MTIF3                    | rs4771122  | 13  | 26,918,180    | g       | a     | 0.92               | 0.94        | 123,861 | 1.20E-07 | rs4771122                             | 26,918,180    | -    | 0.92               | 0.94        | g       | a     | 24%                         | 0.84          | 0.24      | 123,861 | 1.20E-07 | 74,716  | 8.24E-04 | 198,577           | 9.48E-10  |
| ZNF608                   | rs4836133  | 5   | 124,360,002   | a       | c     | 0.90               | 0.92        | 123,266 | 7.04E-07 | rs4836133                             | 124,360,002   | -    | 0.90               | 0.92        | a       | c     | 48%                         | 0.55          | 0.17      | 123,266 | 7.04E-07 | 118,733 | 1.88E-04 | 241,999           | 1.97E-09  |
| RPL27A                   | rs4929949  | 11  | 8,561,169     | c       | t     | 0.95               | 0.96        | 123,860 | 7.57E-08 | rs4929949                             | 8,561,169     | -    | 0.95               | 0.96        | c       | t     | 52%                         | 0.35          | 0.09      | 123,860 | 7.57E-08 | 125,931 | 1.00E-03 | 249,791           | 2.80E-09  |
| KCTD15                   | rs29938    | 19  | 39,003,321    | c       | t     | 0.96               | 0.97        | 123,855 | 1.31E-09 | rs29941                               | 39,001,372    | 0.96 | 0.99               | 0.98        | g       | a     | 67%                         | 0.97          | 0.98      | 123,842 | 2.42E-09 | 69,030  | 2.40E-02 | 192,872           | 3.01E-09  |
| NUDT3                    | rs9296115  | 6   | 34,542,693    | c       | a     | 0.92               | 0.95        | 123,743 | 2.81E-06 | rs206936                              | 34,410,847    | NA   | 0.99               | 0.99        | g       | a     | 21%                         | 0.19          | 0.98      | 123,865 | 4.56E-06 | 125,912 | 7.39E-04 | 249,777           | 3.02E-08  |
| HNF4G                    | rs2922763  | 8   | 76,736,266    | t       | g     | 0.93               | 0.95        | 123,861 | 2.13E-07 | rs2922763                             | 76,736,266    | -    | 0.93               | 0.95        | t       | g     | 71%                         | 0.47          | 0.26      | 123,861 | 2.13E-07 | 83,946  | 1.54E-02 | 207,807           | 6.46E-08  |
| ADCY9                    | rs2444217  | 16  | 3,978,388     | a       | g     | 0.88               | 0.93        | 123,855 | 3.44E-06 | rs2444217                             | 3,978,388     | -    | 0.88               | 0.93        | a       | g     | 57%                         | 0.98          | 0.32      | 123,855 | 3.44E-06 | 74,931  | 4.25E-03 | 198,786           | 9.49E-08  |
| LMXB1B                   | rs867559   | 9   | 128,505,146   | g       | a     | 0.91               | 0.95        | 123,779 | 2.24E-06 | rs867559                              | 128,505,146   | -    | 0.91               | 0.95        | g       | a     | 22%                         | 0.85          | 0.07      | 123,779 | 2.24E-06 | 102,704 | 4.26E-03 | 226,483           | 1.39E-07  |
| CBX1                     | rs3764400  | 17  | 43,478,931    | c       | t     | 0.79               | 0.86        | 123,736 | 2.41E-06 | rs3764400                             | 43,478,931    | -    | 0.79               | 0.86        | c       | t     | 14%                         | 0.11          | 0.71      | 123,736 | 2.41E-06 | 74,847  | 1.73E-02 | 198,583           | 4.13E-07  |
| HTR1A                    | rs255414   | 5   | 62,853,656    | a       | g     | 0.97               | 0.99        | 123,865 | 8.64E-07 | rs255414                              | 62,853,656    | -    | 0.97               | 0.99        | a       | g     | 81%                         | 0.76          | 0.05      | 123,865 | 8.64E-07 | 75,323  | 6.54E-02 | 199,188           | 1.05E-06  |
| KIAA1505                 | rs6955651  | 7   | 76,477,807    | t       | c     | 0.52               | 0.55        | 82,760  | 1.68E-06 | rs6955651                             | 76,477,807    | -    | 0.52               | 0.55        | t       | c     | 18%                         | 0.51          | 0.10      | 82,760  | 1.68E-06 | 42,912  | 4.21E-02 | 125,672           | 1.92E-06  |
| REG3A                    | rs17016663 | 2   | 79,347,442    | c       | g     | 0.96               | 0.98        | 123,857 | 3.52E-07 | rs12622013                            | 79,354,870    | 1.00 | 0.96               | 0.97        | g       | a     | 11%                         | 0.76          | 0.11      | 123,856 | 3.68E-07 | 121,428 | 1.97E-01 | 245,284           | 2.13E-05  |
| C9orf4                   | rs6477694  | 9   | 110,972,163   | c       | t     | 1.00               | 1.00        | 123,801 | 5.36E-06 | rs6477694                             | 110,972,163   | -    | 1.00               | 1.00        | c       | t     | 36%                         | 0.83          | 0.66      | 123,801 | 5.36E-06 | 110,357 | 1.89E-01 | 234,158           | 4.84E-05  |
| SCG3                     | rs2652594  | 15  | 49,794,102    | t       | c     | 0.88               | 0.88        | 123,848 | 3.81E-06 | rs2652594                             | 49,794,102    |      |                    |             |         |       |                             |               |           |         |          |         |          |                   |           |

Supplementary Table 2 - Association of 32 replicated SNPs with other anthropometric traits.

| SNP                                     | Nearest Gene           | Alleles |       | BMI     |     |          | Height  |     |          | Weight  |     |          | % Body fat |     |          | Risk of overweight (BMI ≥ 25 kg/m <sup>2</sup> ) |       |       |         | Risk of obesity (BMI ≥ 30 kg/m <sup>2</sup> ) |        |       |         |       |          |
|-----------------------------------------|------------------------|---------|-------|---------|-----|----------|---------|-----|----------|---------|-----|----------|------------|-----|----------|--------------------------------------------------|-------|-------|---------|-----------------------------------------------|--------|-------|---------|-------|----------|
|                                         |                        | Effect  | Other | n       | dir | P-value  | n       | dir | P-value  | n       | dir | P-value  | n          | dir | P-value  | N                                                | OR    | 95%CI | P-value | N                                             | OR     | 95%CI | P-value |       |          |
| <b>Previous BMI loci</b>                |                        |         |       |         |     |          |         |     |          |         |     |          |            |     |          |                                                  |       |       |         |                                               |        |       |         |       |          |
| rs1558902                               | <i>FTO</i>             | a       | t     | 68,498  | +   | 1.01E-60 | 69,709  | -   | 9.62E-02 | 61,918  | +   | 2.06E-41 | 14,935     | +   | 8.79E-11 | 63,948                                           | 1.138 | 1.114 | 1.164   | 3.43E-31                                      | 42,591 | 1.203 | 1.169   | 1.237 | 4.71E-38 |
| rs2867125                               | <i>TMEM18</i>          | c       | t     | 73,973  | +   | 4.42E-30 | 75,182  | +   | 4.06E-01 | 67,390  | +   | 2.16E-22 | 20,481     | +   | 5.29E-03 | 69,421                                           | 1.119 | 1.089 | 1.150   | 3.03E-16                                      | 45,424 | 1.134 | 1.095   | 1.174 | 2.53E-12 |
| rs571312                                | <i>MC4R</i>            | a       | c     | 79,788  | +   | 3.19E-21 | 80,997  | +   | 5.50E-09 | 73,265  | +   | 1.56E-28 | 16,973     | +   | 2.96E-03 | 72,870                                           | 1.094 | 1.068 | 1.121   | 4.24E-13                                      | 49,825 | 1.108 | 1.074   | 1.143 | 1.44E-10 |
| rs10938397                              | <i>GNPDA2</i>          | g       | a     | 73,160  | +   | 1.45E-15 | 74,370  | -   | 2.05E-03 | 66,577  | +   | 4.04E-08 | 19,709     | +   | 1.01E-05 | 68,608                                           | 1.061 | 1.039 | 1.084   | 4.57E-08                                      | 44,976 | 1.075 | 1.047   | 1.105 | 1.48E-07 |
| rs10767664                              | <i>BDNF</i>            | a       | t     | 80,293  | +   | 1.17E-14 | 81,502  | -   | 8.16E-01 | 73,713  | +   | 3.74E-11 | 17,263     | +   | 2.86E-04 | 73,318                                           | 1.057 | 1.031 | 1.084   | 1.45E-05                                      | 50,052 | 1.079 | 1.044   | 1.115 | 5.21E-06 |
| rs2815752                               | <i>NEGR1</i>           | a       | g     | 74,531  | +   | 2.29E-09 | 75,743  | -   | 4.57E-01 | 67,951  | +   | 3.68E-06 | 20,632     | +   | 4.10E-03 | 69,981                                           | 1.045 | 1.023 | 1.067   | 4.17E-05                                      | 45,696 | 1.061 | 1.033   | 1.090 | 1.73E-05 |
| rs7359397                               | <i>SH2B1</i>           | t       | c     | 80,445  | +   | 7.89E-12 | 81,656  | +   | 1.95E-01 | 73,867  | +   | 3.32E-10 | 17,330     | +   | 3.94E-02 | 73,476                                           | 1.041 | 1.020 | 1.063   | 1.20E-04                                      | 50,141 | 1.049 | 1.022   | 1.077 | 3.84E-04 |
| rs9816226                               | <i>ETV5</i>            | t       | a     | 72,362  | +   | 1.15E-06 | 73,573  | -   | 8.28E-01 | 65,780  | +   | 3.75E-04 | 17,147     | +   | 6.44E-01 | 69,401                                           | 1.029 | 1.001 | 1.057   | 3.93E-02                                      | 45,597 | 1.066 | 1.028   | 1.105 | 5.02E-04 |
| rs3817334                               | <i>MTCH2</i>           | t       | c     | 68,128  | +   | 1.10E-03 | 69,337  | -   | 3.95E-05 | 61,548  | +   | 2.41E-01 | 14,586     | +   | 3.60E-01 | 63,579                                           | 1.016 | 0.995 | 1.039   | 1.43E-01                                      | 42,342 | 1.016 | 0.988   | 1.045 | 2.53E-01 |
| rs29941                                 | <i>KCTD15</i>          | g       | a     | 69,030  | +   | 2.40E-02 | 70,237  | -   | 9.42E-01 | 62,447  | +   | 1.45E-01 | 15,444     | +   | 8.47E-01 | 64,478                                           | 1.023 | 1.000 | 1.046   | 4.79E-02                                      | 42,827 | 1.017 | 0.988   | 1.046 | 2.65E-01 |
| <b>Previous waist &amp; weight loci</b> |                        |         |       |         |     |          |         |     |          |         |     |          |            |     |          |                                                  |       |       |         |                                               |        |       |         |       |          |
| rs543874                                | <i>SEC16B</i>          | g       | a     | 55,551  | +   | 2.41E-11 | 60,009  | +   | 1.50E-01 | 52,184  | +   | 1.28E-11 | 6,696      | +   | 4.70E-01 | 51,861                                           | 1.072 | 1.041 | 1.104   | 4.02E-06                                      | 38,577 | 1.098 | 1.059   | 1.138 | 3.43E-07 |
| rs987237                                | <i>TFAP2B</i>          | g       | a     | 71,916  | +   | 2.40E-06 | 76,384  | +   | 2.91E-01 | 68,594  | +   | 2.62E-06 | 21,465     | +   | 2.49E-03 | 70,623                                           | 1.050 | 1.023 | 1.078   | 2.44E-04                                      | 46,043 | 1.085 | 1.049   | 1.122 | 1.60E-06 |
| rs7138803                               | <i>FAIM2</i>           | a       | g     | 76,265  | +   | 7.82E-08 | 77,474  | +   | 1.58E-04 | 69,687  | +   | 2.23E-10 | 15,124     | +   | 5.95E-03 | 67,839                                           | 1.044 | 1.022 | 1.066   | 8.74E-05                                      | 44,452 | 1.069 | 1.040   | 1.098 | 1.47E-06 |
| rs10150332                              | <i>NRXN3</i>           | c       | t     | 59,157  | +   | 2.86E-05 | 63,614  | +   | 6.60E-04 | 55,827  | +   | 4.03E-09 | 6,673      | +   | 3.43E-02 | 55,467                                           | 1.054 | 1.025 | 1.083   | 1.83E-04                                      | 40,487 | 1.085 | 1.049   | 1.123 | 2.06E-06 |
| <b>Newly identified BMI loci</b>        |                        |         |       |         |     |          |         |     |          |         |     |          |            |     |          |                                                  |       |       |         |                                               |        |       |         |       |          |
| rs713586                                | <i>RBJ; POMC</i>       | c       | t     | 115,850 | +   | 8.13E-12 | 105,088 | -   | 1.59E-12 | 97,305  | +   | 2.91E-04 | 25,244     | +   | 8.26E-05 | 105,415                                          | 1.052 | 1.034 | 1.071   | 6.62E-09                                      | 71,063 | 1.069 | 1.045   | 1.093 | 6.45E-09 |
| rs12444979                              | <i>GPRC5B</i>          | c       | t     | 107,030 | +   | 1.44E-16 | 117,062 | -   | 1.87E-01 | 109,272 | +   | 1.23E-08 | 28,335     | +   | 1.62E-02 | 108,562                                          | 1.085 | 1.058 | 1.112   | 2.05E-10                                      | 72,346 | 1.078 | 1.044   | 1.114 | 6.30E-06 |
| rs2241423                               | <i>MAP2K5</i>          | g       | a     | 104,115 | +   | 1.59E-09 | 98,921  | -   | 6.78E-01 | 91,132  | +   | 6.30E-09 | 17,540     | -   | 3.23E-01 | 96,812                                           | 1.045 | 1.022 | 1.069   | 9.74E-05                                      | 68,968 | 1.065 | 1.035   | 1.096 | 1.93E-05 |
| rs2287019                               | <i>QPCTL; GIPR</i>     | c       | t     | 94,091  | +   | 1.40E-10 | 88,905  | -   | 2.21E-03 | 81,114  | +   | 3.92E-05 | 16,800     | +   | 6.01E-01 | 90,803                                           | 1.055 | 1.031 | 1.079   | 3.95E-06                                      | 63,153 | 1.086 | 1.054   | 1.119 | 7.46E-08 |
| rs1514175                               | <i>TNNI3K</i>          | a       | g     | 118,952 | +   | 1.72E-07 | 98,882  | -   | 9.60E-01 | 91,093  | +   | 3.19E-05 | 17,561     | +   | 3.41E-01 | 95,783                                           | 1.043 | 1.024 | 1.063   | 6.49E-06                                      | 68,946 | 1.044 | 1.020   | 1.069 | 2.76E-04 |
| rs13107325                              | <i>SLC39A8</i>         | t       | c     | 104,065 | +   | 7.04E-06 | 116,812 | -   | 1.53E-03 | 109,023 | +   | 4.59E-03 | 28,089     | +   | 4.72E-04 | 114,749                                          | 1.062 | 1.025 | 1.101   | 1.05E-03                                      | 78,427 | 1.098 | 1.048   | 1.150 | 9.03E-05 |
| rs2112347                               | <i>FLJ35779; HMGCR</i> | t       | g     | 93,055  | +   | 3.19E-06 | 102,743 | +   | 4.95E-01 | 94,954  | +   | 9.95E-08 | 17,553     | +   | 5.23E-01 | 100,925                                          | 1.042 | 1.023 | 1.061   | 1.30E-05                                      | 71,491 | 1.052 | 1.030   | 1.075 | 2.38E-06 |
| rs10968576                              | <i>LRRNGC</i>          | g       | a     | 107,866 | +   | 8.29E-07 | 94,267  | +   | 2.91E-01 | 86,437  | +   | 4.01E-06 | 16,283     | +   | 1.79E-01 | 85,765                                           | 1.035 | 1.015 | 1.056   | 6.96E-04                                      | 60,107 | 1.040 | 1.016   | 1.064 | 1.13E-03 |
| rs3810291                               | <i>TMEM160</i>         | a       | g     | 122,030 | +   | 1.93E-07 | 115,191 | +   | 8.60E-01 | 107,400 | +   | 1.77E-06 | 24,854     | +   | 9.52E-02 | 106,457                                          | 1.024 | 1.005 | 1.045   | 1.41E-02                                      | 71,161 | 1.055 | 1.029   | 1.083 | 3.27E-05 |
| rs887912                                | <i>FANCL</i>           | t       | c     | 113,981 | +   | 1.59E-06 | 120,162 | +   | 5.48E-02 | 112,372 | +   | 3.52E-07 | 28,089     | +   | 4.14E-01 | 111,655                                          | 1.020 | 1.006 | 1.034   | 5.70E-03                                      | 74,506 | 1.051 | 1.026   | 1.077 | 5.98E-05 |
| rs13078807                              | <i>CADM2</i>           | g       | a     | 113,596 | +   | 5.32E-05 | 108,364 | +   | 9.95E-01 | 100,572 | +   | 2.26E-04 | 27,895     | +   | 1.96E-03 | 110,328                                          | 1.028 | 1.006 | 1.051   | 1.07E-02                                      | 73,896 | 1.027 | 0.998   | 1.056 | 6.85E-02 |
| rs11847697                              | <i>PRKD1</i>           | t       | c     | 85,213  | +   | 9.47E-05 | 116,616 | -   | 7.34E-01 | 108,827 | +   | 3.91E-03 | 28,184     | +   | 8.36E-02 | 114,493                                          | 1.073 | 1.025 | 1.124   | 2.61E-03                                      | 78,441 | 1.102 | 1.037   | 1.170 | 1.58E-03 |
| rs2890652                               | <i>LRP1B</i>           | c       | t     | 121,816 | +   | 2.25E-04 | 86,415  | +   | 8.40E-01 | 78,623  | +   | 4.38E-04 | 17,096     | +   | 5.16E-01 | 81,945                                           | 1.027 | 1.003 | 1.053   | 3.06E-02                                      | 55,070 | 1.048 | 1.015   | 1.082 | 3.98E-03 |
| rs1555543                               | <i>PTBP2</i>           | c       | a     | 74,716  | +   | 8.24E-04 | 113,938 | +   | 2.69E-03 | 106,149 | +   | 4.04E-06 | 28,186     | +   | 1.71E-02 | 112,176                                          | 1.016 | 0.999 | 1.033   | 7.07E-02                                      | 76,880 | 1.016 | 0.994   | 1.039 | 1.62E-01 |
| rs4771122                               | <i>MTIF3</i>           | g       | a     | 118,733 | +   | 1.88E-04 | 75,917  | +   | 3.78E-02 | 68,128  | +   | 6.41E-05 | 5,359      | +   | 7.73E-02 | 67,423                                           | 1.030 | 1.004 | 1.055   | 2.22E-02                                      | 48,566 | 1.045 | 1.013   | 1.079 | 6.31E-03 |
| rs4836133                               | <i>ZNF608</i>          | a       | c     | 119,157 | +   | 4.48E-05 | 113,530 | -   | 9.70E-01 | 105,701 | +   | 6.64E-04 | 28,413     | +   | 2.52E-01 | 112,955                                          | 1.031 | 1.014 | 1.049   | 3.81E-04                                      | 76,231 | 1.029 | 1.006   | 1.052 | 1.19E-02 |
| rs4929949                               | <i>RPL27A</i>          | c       | t     | 125,931 | +   | 1.00E-03 | 120,718 | +   | 9.55E-01 | 112,929 | +   | 5.80E-03 | 28,425     | +   | 1.60E-01 | 118,650                                          | 1.013 | 0.996 | 1.029   | 1.37E-01                                      | 81,228 | 1.027 | 1.005   | 1.049 | 1.49E-02 |
| rs206936                                | <i>NUDT3</i>           | g       | a     | 125,912 | +   | 7.39E-04 | 120,688 | +   | 3.08E-02 | 116,162 | +   | 3.75E-04 | 28,423     | +   | 3.33E-01 | 118,697                                          | 1.034 | 1.013 | 1.056   | 1.36E-03                                      | 81,206 | 1.032 | 1.005   | 1.060 | 1.99E-02 |

All results were obtained from stage 2 (replication) samples

Supplementary Table 3 - Association between 32 replicated SNPs with risk of extreme obesity in children and adults, with BMI in population-based childhood studies, and with extreme obesity in family-based studies.

| Nearest gene                            | SNP         | Case-control studies with extreme obese adults and children/adolescents |       |                  |       |             |         |          |                  | Case-control studies with extreme obese children/adolescents (adults not included) |       |         |       |                             | Population-based studies in children and adolescents |     |         |       | TDT on families with one extremely obese child/adolescent |                  |         |                        |          |       |
|-----------------------------------------|-------------|-------------------------------------------------------------------------|-------|------------------|-------|-------------|---------|----------|------------------|------------------------------------------------------------------------------------|-------|---------|-------|-----------------------------|------------------------------------------------------|-----|---------|-------|-----------------------------------------------------------|------------------|---------|------------------------|----------|-------|
|                                         |             | Allele                                                                  |       | Frequency effect | 95%CI |             | P-value | N        | Frequency effect | 95%CI                                                                              |       | P-value | N     | Frequency effect allele (%) | Beta                                                 | SE  | P-value | N     | Frequency effect allele (%)                               | Effect direction | P-value | N (one parent + child) |          |       |
|                                         |             | Effect                                                                  | Other | allele (%)*      | OR    | Lower limit |         |          | Upper limit      | allele (%)*                                                                        | OR    |         |       | Lower limit                 |                                                      |     |         |       | Upper limit                                               |                  |         |                        | (%)      | (%)   |
| <b>Previous BMI loci</b>                |             |                                                                         |       |                  |       |             |         |          |                  |                                                                                    |       |         |       |                             |                                                      |     |         |       |                                                           |                  |         |                        |          |       |
| <i>FTO</i>                              | rs1558902   | a                                                                       | t     | 42%              | 1.476 | 1.338       | 1.629   | 8.42E-15 | 4,142            | 43%                                                                                | 1.435 | 1.268   | 1.623 | 8.91E-09                    | 2,765                                                | 42% | -0.023  | 0.064 | 7.16E-01                                                  | 355              | 49%     | +                      | 9.18E-04 | 848   |
| <i>TMEM18</i>                           | rs2867125   | c                                                                       | t     | 83%              | 1.463 | 1.326       | 1.614   | 3.58E-14 | 9,954            | 83%                                                                                | 1.445 | 1.294   | 1.614 | 6.31E-11                    | 8,574                                                | 85% | 0.056   | 0.094 | 5.53E-01                                                  | 355              | 86%     | +                      | 8.42E-03 | 848   |
| <i>MC4R</i>                             | rs571312    | a                                                                       | c     | 24%              | 1.370 | 1.267       | 1.480   | 2.28E-15 | 10,507           | 24%                                                                                | 1.376 | 1.263   | 1.499 | 2.44E-13                    | 9,127                                                | 28% | 0.001   | 0.075 | 9.90E-01                                                  | 355              | 29%     | +                      | 4.46E-02 | 848   |
| <i>GNPDA2</i>                           | rs10938397  | g                                                                       | a     | 42%              | 1.182 | 1.067       | 1.309   | 1.34E-03 | 3,741            | 43%                                                                                | 1.135 | 1.000   | 1.289 | 5.06E-02                    | 2,363                                                | 37% | -0.112  | 0.072 | 1.22E-01                                                  | 355              | 44%     | +                      | 2.24E-01 | 848   |
| <i>BDNF</i>                             | rs10767664  | a                                                                       | t     | 77%              | 1.252 | 1.112       | 1.408   | 1.94E-04 | 4,015            | 77%                                                                                | 1.224 | 1.056   | 1.420 | 7.33E-03                    | 2,635                                                | 76% | -0.005  | 0.077 | 9.52E-01                                                  | 355              | 80%     | +                      | 6.78E-01 | 848   |
| <i>NEGR1</i>                            | rs2815752   | a                                                                       | g     | 62%              | 1.249 | 1.161       | 1.342   | 2.01E-09 | 9,901            | 62%                                                                                | 1.241 | 1.145   | 1.346 | 1.49E-07                    | 8,521                                                | 62% | 0.012   | 0.070 | 8.65E-01                                                  | 355              | 63%     | +                      | 1.30E-01 | 848   |
| <i>SH2B1</i>                            | rs7359397   | t                                                                       | c     | 38%              | 1.111 | 1.034       | 1.194   | 4.00E-03 | 10,461           | 38%                                                                                | 1.096 | 1.013   | 1.186 | 2.31E-02                    | 9,081                                                | 40% | -0.096  | 0.067 | 1.49E-01                                                  | 355              | 43%     | +                      | 3.08E-03 | 848   |
| <i>ETV5</i>                             | rs9816226   | t                                                                       | a     | 82%              | 1.178 | 1.036       | 1.339   | 1.22E-02 | 3,733            | 81%                                                                                | 1.142 | 0.974   | 1.339 | 1.01E-01                    | 2,353                                                | 81% | 0.091   | 0.086 | 2.90E-01                                                  | 355              | 84%     | +                      | 1.41E-02 | 848   |
| <i>MTCH2</i>                            | rs3817334   | t                                                                       | c     | 41%              | 1.050 | 0.978       | 1.126   | 1.77E-01 | 10,337           | 41%                                                                                | 1.030 | 0.953   | 1.114 | 4.51E-01                    | 8,957                                                | 39% | 0.089   | 0.070 | 2.02E-01                                                  | 355              | 42%     | +                      | 5.18E-01 | 848   |
| <i>KCTD15</i>                           | rs29941     | g                                                                       | a     | 68%              | 1.084 | 1.006       | 1.168   | 3.44E-02 | 10,523           | 68%                                                                                | 1.080 | 0.994   | 1.173 | 7.02E-02                    | 9,143                                                | 68% | 0.185   | 0.069 | 7.23E-03                                                  | 355              | 69%     | +                      | 1.08E-01 | 848   |
| <b>Previous waist &amp; weight loci</b> |             |                                                                         |       |                  |       |             |         |          |                  |                                                                                    |       |         |       |                             |                                                      |     |         |       |                                                           |                  |         |                        |          |       |
| <i>SEC16B</i>                           | rs543874    | g                                                                       | a     | 20%              | 1.278 | 1.174       | 1.392   | 1.69E-08 | 9,933            | 21%                                                                                | 1.257 | 1.145   | 1.379 | 1.42E-06                    | 8,553                                                | 17% | 0.103   | 0.084 | 2.23E-01                                                  | 355              | 21%     | +                      | 7.06E-03 | 848   |
| <i>TFAP2B</i>                           | rs987237    | g                                                                       | a     | 18%              | 1.154 | 1.057       | 1.259   | 1.33E-03 | 10,184           | 18%                                                                                | 1.185 | 1.076   | 1.304 | 5.43E-04                    | 8,804                                                | 17% | 0.027   | 0.091 | 7.62E-01                                                  | 355              | 21%     | +                      | 1.12E-01 | 848   |
| <i>FAIM2</i>                            | rs7138803   | a                                                                       | g     | 37%              | 1.222 | 1.138       | 1.312   | 3.50E-08 | 10,364           | 37%                                                                                | 1.224 | 1.131   | 1.324 | 4.38E-07                    | 8,984                                                | 38% | -0.003  | 0.069 | 9.63E-01                                                  | 354              | 41%     | +                      | 1.99E-01 | 848   |
| <i>NRXN3</i>                            | rs10150332  | c                                                                       | t     | 19%              | 1.096 | 0.971       | 1.237   | 1.39E-01 | 4,103            | 20%                                                                                | 1.081 | 0.930   | 1.258 | 3.10E-01                    | 2,723                                                | 22% | 0.162   | 0.089 | 6.81E-02                                                  | 355              | 23%     | +                      | 5.68E-01 | 848   |
| <b>Newly identified BMI loci</b>        |             |                                                                         |       |                  |       |             |         |          |                  |                                                                                    |       |         |       |                             |                                                      |     |         |       |                                                           |                  |         |                        |          |       |
| <i>RBJ; POMC</i>                        | rs713586    | c                                                                       | t     | 47%              | 1.085 | 1.029       | 1.143   | 2.38E-03 | 14,774           | 47%                                                                                | 1.100 | 1.037   | 1.166 | 1.63E-03                    | 12,433                                               | 46% | 0.087   | 0.025 | 6.06E-04                                                  | 3,166            | 49%     | +                      | 4.34E-01 | 1,456 |
| <i>GPRC5B</i>                           | rs12444979  | c                                                                       | t     | 87%              | 1.004 | 0.850       | 1.187   | 9.59E-01 | 2,681            | 88%                                                                                | 0.881 | 0.689   | 1.125 | 3.10E-01                    | 1,301                                                | 87% | 0.031   | 0.028 | 2.57E-01                                                  | 5,706            | 88%     | +                      | 2.37E-02 | 848   |
| <i>MAP2K5</i>                           | rs2241423   | g                                                                       | a     | 76%              | 1.105 | 1.037       | 1.178   | 1.99E-03 | 15,250           | 76%                                                                                | 1.111 | 1.033   | 1.194 | 4.40E-03                    | 12,891                                               | 81% | 0.014   | 0.020 | 4.68E-01                                                  | 8,506            | 79%     | +                      | 3.25E-02 | 1,460 |
| <i>QPCTL; GIPR</i>                      | rs2287019   | c                                                                       | t     | 83%              | 1.165 | 1.015       | 1.338   | 2.98E-02 | 4,209            | 84%                                                                                | 1.152 | 0.963   | 1.378 | 1.22E-01                    | 2,829                                                |     |         |       |                                                           |                  | 91%     | +                      | 9.35E-01 | 848   |
| <i>TNNI3K</i>                           | rs1514175   | a                                                                       | g     | 42%              | 1.149 | 1.090       | 1.211   | 2.71E-07 | 14,733           | 43%                                                                                | 1.172 | 1.104   | 1.243 | 1.49E-07                    | 12,374                                               | 46% | 0.066   | 0.015 | 1.60E-05                                                  | 8,508            | 44%     | -                      | 5.78E-01 | 1,454 |
| <i>SLC39A8</i>                          | rs13107325  | t                                                                       | c     | 7%               | 1.217 | 1.075       | 1.379   | 2.01E-03 | 7,536            | 7%                                                                                 | 1.248 | 1.072   | 1.451 | 4.17E-03                    | 5,174                                                | 5%  | -0.026  | 0.053 | 6.17E-01                                                  | 3,178            | 8%      | -                      | 6.53E-01 | 1,462 |
| <i>FLJ35779; HMGCR</i>                  | rs2112347   | t                                                                       | g     | 64%              | 1.044 | 0.979       | 1.113   | 1.93E-01 | 8,547            | 63%                                                                                | 1.047 | 0.970   | 1.130 | 2.39E-01                    | 6,199                                                | 62% | 0.016   | 0.016 | 2.98E-01                                                  | 8,494            | 66%     | +                      | 5.79E-01 | 1,464 |
| <i>LRRN6C</i>                           | rs109688576 | g                                                                       | a     | 30%              | 1.032 | 0.953       | 1.118   | 4.39E-01 | 10,216           | 31%                                                                                | 1.033 | 0.945   | 1.129 | 4.78E-01                    | 8,836                                                | 39% | 0.014   | 0.019 | 4.72E-01                                                  | 5,704            | 44%     | +                      | 5.61E-01 | 848   |
| <i>TMEM160</i>                          | rs3810291   | a                                                                       | g     | 66%              | 0.980 | 0.904       | 1.062   | 6.17E-01 | 9,878            | 66%                                                                                | 0.983 | 0.899   | 1.075 | 7.07E-01                    | 8,501                                                | 61% | 0.105   | 0.079 | 1.85E-01                                                  | 355              | 72%     | +                      | 2.52E-02 | 848   |
| <i>FANCL</i>                            | rs887912    | t                                                                       | c     | 27%              | 1.180 | 1.060       | 1.315   | 2.58E-03 | 3,656            | 27%                                                                                | 1.100 | 0.961   | 1.258 | 1.66E-01                    | 2,276                                                | 27% | 0.011   | 0.021 | 6.13E-01                                                  | 5,700            | 29%     | +                      | 7.44E-01 | 848   |
| <i>CADM2</i>                            | rs13078807  | g                                                                       | a     | 19%              | 1.053 | 0.984       | 1.126   | 1.36E-01 | 14,752           | 19%                                                                                | 1.047 | 0.971   | 1.130 | 2.32E-01                    | 12,396                                               | 17% | 0.083   | 0.020 | 4.54E-05                                                  | 8,540            | 19%     | -                      | 7.22E-01 | 1,458 |
| <i>PRKD1</i>                            | rs11847697  | t                                                                       | c     | 5%               | 1.377 | 1.190       | 1.594   | 1.80E-05 | 8,934            | 5%                                                                                 | 1.470 | 1.242   | 1.742 | 7.94E-06                    | 6,570                                                | 4%  | -0.003  | 0.049 | 9.44E-01                                                  | 8,529            | 5%      | -                      | 3.54E-01 | 1,462 |
| <i>LRP1B</i>                            | rs2890652   | c                                                                       | t     | 16%              | 1.004 | 0.875       | 1.152   | 9.52E-01 | 3,665            | 17%                                                                                | 0.963 | 0.814   | 1.140 | 6.62E-01                    | 2,286                                                | 26% | 0.001   | 0.021 | 9.68E-01                                                  | 5,561            | 17%     | +                      | 9.48E-01 | 848   |
| <i>PTBP2</i>                            | rs1555543   | c                                                                       | a     | 57%              | 1.066 | 1.010       | 1.125   | 2.01E-02 | 14,738           | 57%                                                                                | 1.046 | 0.984   | 1.110 | 1.47E-01                    | 12,374                                               | 59% | 0.037   | 0.016 | 1.73E-02                                                  | 8,515            | 60%     | +                      | 1.40E-01 | 1,456 |
| <i>MTIF3</i>                            | rs4771122   | g                                                                       | a     | 22%              | 1.121 | 0.973       | 1.291   | 1.14E-01 | 2,680            | 22%                                                                                | 1.239 | 1.013   | 1.515 | 3.66E-02                    | 1,301                                                | 34% | 0.017   | 0.020 | 3.88E-01                                                  | 5,700            | 4%      | -                      | 8.98E-01 | 848   |
| <i>ZNF608 (triallelic)</i>              | rs4836133   | a                                                                       | c     | 50%              | 1.087 | 1.017       | 1.161   | 1.42E-02 | 7,518            | 50%                                                                                | 1.108 | 1.022   | 1.201 | 1.25E-02                    | 5,162                                                | 54% | -0.009  | 0.015 | 5.82E-01                                                  | 8,498            | 51%     | -                      | 8.09E-01 | 608   |
| <i>RPL27A</i>                           | rs4929949   | c                                                                       | t     | 49%              | 0.996 | 0.935       | 1.060   | 9.01E-01 | 8,852            | 48%                                                                                | 0.962 | 0.892   | 1.037 | 3.12E-01                    | 6,489                                                | 52% | 0.035   | 0.015 | 2.04E-02                                                  | 8,495            | 49%     | -                      | 1.86E-01 | 1,454 |
| <i>NUDT3</i>                            | rs206936    | g                                                                       | a     | 21%              | 1.076 | 1.009       | 1.147   | 2.67E-02 | 15,008           | 21%                                                                                | 1.071 | 0.996   | 1.152 | 6.33E-02                    | 12,648                                               | 23% | 0.024   | 0.018 | 1.90E-01                                                  | 8,502            | 21%     | -                      | 5.78E-01 | 1,462 |

\* Frequency effect allele from controls only

Supplementary Table 4

Supplementary Table 4 - Association of the 32 confirmed BMI SNPs with metabolic traits.

| SNP                                     | Nearest Gene           | Alleles |   | HDL-cholesterol<br>n~19,000 |                 | LDL-cholesterol<br>n~19,000 |                 | Triglycerides<br>n~19,000 |          | Fasting Glucose<br>n=8,684 |          | Fasting Insulin<br>n=8,684 |                 | 2 hour Glucose<br>(BMI adjusted)<br>n=8,684 |                 | 2 hour Glucose<br>n=8,684 |                 | HOMA IR<br>n=8,684 |                 | HOMA B<br>n=8,684 |          | Type 2 diabetes<br>n <sub>cases</sub> =4,549 vs.<br>n <sub>controls</sub> = 5,579 |                 |
|-----------------------------------------|------------------------|---------|---|-----------------------------|-----------------|-----------------------------|-----------------|---------------------------|----------|----------------------------|----------|----------------------------|-----------------|---------------------------------------------|-----------------|---------------------------|-----------------|--------------------|-----------------|-------------------|----------|-----------------------------------------------------------------------------------|-----------------|
|                                         |                        |         |   | dir                         | P-value         | dir                         | P-value         | dir                       | P-value  | dir                        | P-value  | dir                        | P-value         | dir                                         | P-value         | dir                       | P-value         | dir                | P-value         | dir               | P-value  | dir                                                                               | P-value         |
| <b>Previous BMI loci</b>                |                        |         |   |                             |                 |                             |                 |                           |          |                            |          |                            |                 |                                             |                 |                           |                 |                    |                 |                   |          |                                                                                   |                 |
| rs1558902                               | <i>FTO</i>             | a       | t | -                           | 1.20E-03        | +                           | 7.39E-02        | +                         | 1.34E-01 | +                          | 5.64E-02 | +                          | <b>7.60E-05</b> | -                                           | 9.67E-01        | +                         | 2.15E-01        | +                  | <b>9.50E-05</b> | +                 | 2.06E-02 | +                                                                                 | 1.91E-01        |
| rs2867125                               | <i>TMEM18</i>          | c       | t | -                           | 2.28E-01        | -                           | 2.01E-01        | +                         | 9.32E-02 | +                          | 2.35E-01 | +                          | 3.22E-02        | +                                           | 4.49E-01        | +                         | 1.81E-01        | +                  | 3.87E-02        | +                 | 3.39E-02 | +                                                                                 | 1.39E-01        |
| rs571312                                | <i>MC4R</i>            | a       | c | -                           | 1.58E-01        | -                           | 7.18E-01        | +                         | 4.20E-01 | +                          | 3.57E-01 | +                          | 3.10E-02        | +                                           | 1.91E-01        | +                         | 5.06E-02        | +                  | 2.30E-02        | +                 | 3.56E-02 | +                                                                                 | 6.67E-01        |
| rs10938397                              | <i>GNPDA2</i>          | g       | a | -                           | 2.40E-03        | +                           | 2.23E-01        | +                         | 3.51E-01 | -                          | 6.21E-01 | +                          | <b>5.20E-05</b> | -                                           | 5.26E-01        | -                         | 8.01E-01        | +                  | <b>7.60E-04</b> | +                 | 1.10E-03 | +                                                                                 | <b>3.90E-04</b> |
| rs10767664                              | <i>BDNF</i>            | a       | t | -                           | 4.65E-01        | +                           | 2.10E-01        | +                         | 4.08E-01 | +                          | 2.64E-01 | +                          | 2.28E-01        | -                                           | 2.02E-01        | -                         | 5.21E-01        | +                  | 1.69E-01        | +                 | 6.32E-01 | -                                                                                 | 8.62E-01        |
| rs2815752                               | <i>NEGR1</i>           | a       | g | -                           | 7.85E-01        | -                           | 4.87E-01        | +                         | 1.90E-01 | -                          | 3.52E-01 | +                          | 4.08E-01        | +                                           | 1.43E-01        | +                         | 1.14E-01        | +                  | 3.55E-01        | +                 | 1.11E-01 | -                                                                                 | 4.04E-01        |
| rs7359397                               | <i>SH2B1</i>           | t       | c | -                           | 9.94E-02        | -                           | 2.43E-01        | +                         | 2.46E-01 | +                          | 4.97E-02 | +                          | 1.70E-03        | -                                           | 6.55E-02        | -                         | 2.57E-01        | +                  | 3.90E-03        | +                 | 2.87E-02 | +                                                                                 | 3.06E-01        |
| rs9816226                               | <i>ETV5</i>            | t       | a | +                           | 6.34E-01        | -                           | 6.34E-01        | +                         | 9.41E-01 | +                          | 6.10E-01 | +                          | 5.76E-01        | +                                           | 6.91E-01        | +                         | 3.14E-01        | +                  | 5.12E-01        | -                 | 7.45E-01 | -                                                                                 | 4.73E-01        |
| rs3817334                               | <i>MTCH2</i>           | t       | c | -                           | 3.01E-02        | -                           | 3.47E-01        | +                         | 1.12E-01 | +                          | 2.65E-01 | +                          | 1.77E-01        | -                                           | 9.00E-01        | +                         | 7.24E-01        | +                  | 1.34E-01        | -                 | 9.76E-01 | +                                                                                 | 6.08E-01        |
| rs29941                                 | <i>KCTD15</i>          | g       | a | -                           | 4.61E-01        | -                           | 8.03E-01        | +                         | 5.35E-01 | +                          | 8.06E-01 | +                          | 8.92E-01        | -                                           | 2.20E-01        | -                         | 3.16E-01        | +                  | 7.44E-01        | -                 | 6.61E-01 | -                                                                                 | 5.24E-01        |
| <b>Previous waist &amp; weight loci</b> |                        |         |   |                             |                 |                             |                 |                           |          |                            |          |                            |                 |                                             |                 |                           |                 |                    |                 |                   |          |                                                                                   |                 |
| rs543874                                | <i>SEC16B</i>          | g       | a | +                           | 9.92E-01        | -                           | 9.36E-02        | -                         | 9.09E-01 | +                          | 4.49E-01 | +                          | 1.23E-01        | -                                           | 8.92E-01        | +                         | 6.93E-01        | +                  | 1.28E-01        | +                 | 9.20E-01 | +                                                                                 | 7.01E-01        |
| rs987237                                | <i>TFAP2B</i>          | g       | a | -                           | 9.94E-01        | +                           | 9.08E-02        | +                         | 9.44E-01 | +                          | 2.13E-01 | +                          | 6.89E-02        | +                                           | 7.56E-01        | +                         | 6.50E-01        | +                  | 2.58E-02        | +                 | 3.29E-01 | +                                                                                 | 9.24E-02        |
| rs7138803                               | <i>FAIM2</i>           | a       | g | -                           | 4.15E-01        | +                           | 2.12E-01        | +                         | 2.13E-01 | -                          | 4.90E-01 | +                          | 1.73E-01        | -                                           | 5.07E-01        | -                         | 7.97E-01        | +                  | 2.09E-01        | +                 | 4.58E-02 | +                                                                                 | 2.02E-01        |
| rs10150332                              | <i>NRXN3</i>           | c       | t | -                           | 3.46E-01        | +                           | 8.86E-02        | +                         | 9.65E-01 | +                          | 7.20E-01 | +                          | <b>3.10E-04</b> | -                                           | 8.38E-01        | +                         | 8.22E-01        | +                  | <b>1.90E-04</b> | +                 | 3.30E-03 | +                                                                                 | 5.60E-03        |
| <b>Newly identified BMI loci</b>        |                        |         |   |                             |                 |                             |                 |                           |          |                            |          |                            |                 |                                             |                 |                           |                 |                    |                 |                   |          |                                                                                   |                 |
| rs713586                                | <i>RBJ; POMC</i>       | c       | t | -                           | 4.45E-01        | -                           | 5.98E-01        | -                         | 5.35E-01 | +                          | 4.93E-01 | +                          | 4.76E-01        | +                                           | 7.81E-01        | +                         | 5.18E-01        | +                  | 4.58E-01        | +                 | 6.92E-01 | -                                                                                 | 8.33E-01        |
| rs12444979                              | <i>GPRC5B</i>          | c       | t | -                           | 5.33E-02        | -                           | 6.90E-01        | +                         | 4.26E-01 | +                          | 6.14E-01 | +                          | 4.20E-03        | +                                           | 3.84E-01        | +                         | 2.89E-01        | +                  | 4.50E-03        | +                 | 1.24E-02 | +                                                                                 | 2.33E-01        |
| rs2241423                               | <i>MAP2K5</i>          | g       | a | -                           | 4.43E-01        | +                           | 8.44E-01        | -                         | 1.99E-01 | +                          | 3.00E-01 | -                          | 2.46E-01        | -                                           | 2.78E-01        | -                         | 5.07E-01        | -                  | 4.74E-01        | -                 | 7.25E-02 | +                                                                                 | 1.12E-02        |
| rs2287019                               | <i>QPCTL; GIPR</i>     | c       | t | +                           | 6.79E-02        | +                           | 2.81E-02        | +                         | 9.11E-01 | +                          | 3.99E-02 | +                          | 5.57E-01        | -                                           | <b>1.00E-04</b> | -                         | <b>5.00E-04</b> | +                  | 4.83E-01        | -                 | 9.10E-01 | +                                                                                 | NA              |
| rs1514175                               | <i>TNNI3K</i>          | a       | g | +                           | 4.84E-01        | +                           | 9.75E-01        | +                         | 8.68E-01 | +                          | 1.08E-01 | -                          | 6.07E-01        | -                                           | 1.36E-01        | -                         | 2.12E-01        | +                  | 8.00E-01        | -                 | 5.75E-01 | +                                                                                 | 6.73E-01        |
| rs13107325                              | <i>SLC39A8</i>         | t       | c | -                           | <b>1.20E-06</b> | +                           | 7.13E-01        | +                         | 6.30E-03 | -                          | 6.66E-01 | +                          | 3.99E-01        | +                                           | 5.37E-01        | +                         | 4.72E-01        | +                  | 5.52E-01        | +                 | 3.15E-01 | +                                                                                 | NA              |
| rs2112347                               | <i>FLJ35779; HMGCR</i> | t       | g | +                           | 8.18E-01        | -                           | <b>6.70E-04</b> | -                         | 4.25E-01 | -                          | 3.02E-01 | +                          | 7.03E-01        | +                                           | 8.14E-02        | +                         | 2.73E-02        | +                  | 7.05E-01        | +                 | 6.08E-01 | +                                                                                 | 8.45E-01        |
| rs10968576                              | <i>LRRN6C</i>          | g       | a | -                           | 4.13E-02        | +                           | 8.42E-01        | +                         | 4.87E-01 | +                          | 1.16E-01 | +                          | 6.50E-03        | +                                           | 5.95E-01        | +                         | 3.02E-01        | +                  | 1.66E-02        | +                 | 1.81E-02 | +                                                                                 | 5.92E-01        |
| rs3810291                               | <i>TMEM160</i>         | a       | g | -                           | 9.24E-02        | +                           | 4.42E-01        | +                         | 5.81E-02 | +                          | 6.90E-01 | -                          | 4.90E-01        | +                                           | 4.52E-01        | +                         | 2.80E-01        | -                  | 6.95E-01        | -                 | 9.75E-01 | -                                                                                 | 9.87E-01        |
| rs887912                                | <i>FANCL</i>           | t       | c | -                           | 3.18E-01        | +                           | 3.64E-01        | +                         | 6.15E-02 | -                          | 6.73E-01 | +                          | 2.26E-01        | -                                           | 7.27E-01        | -                         | 9.85E-01        | +                  | 2.82E-01        | +                 | 1.67E-01 | +                                                                                 | 1.81E-01        |
| rs13078807                              | <i>CADM2</i>           | g       | a | -                           | 8.55E-01        | +                           | 8.02E-01        | -                         | 9.60E-01 | +                          | 7.62E-01 | +                          | 3.22E-01        | -                                           | 6.15E-01        | -                         | 6.31E-01        | +                  | 2.82E-01        | +                 | 2.78E-01 | -                                                                                 | 5.67E-01        |
| rs11847697                              | <i>PRKD1</i>           | t       | c | -                           | 5.39E-01        | +                           | 2.36E-01        | +                         | 8.04E-01 | -                          | 6.20E-01 | +                          | 1.27E-01        | +                                           | 2.73E-01        | +                         | 1.97E-01        | +                  | 6.13E-02        | +                 | 5.67E-02 | +                                                                                 | 7.07E-02        |
| rs2890652                               | <i>LRP1B</i>           | c       | t | +                           | 3.51E-01        | -                           | 5.28E-01        | -                         | 8.38E-01 | +                          | 4.70E-02 | -                          | 1.25E-01        | -                                           | 1.93E-01        | -                         | 2.12E-01        | -                  | 4.36E-01        | -                 | 1.22E-01 | +                                                                                 | 5.73E-02        |
| rs1555543                               | <i>PTBP2</i>           | c       | a | -                           | 9.80E-02        | -                           | 8.34E-01        | +                         | 3.51E-01 | -                          | 7.74E-01 | +                          | 2.13E-01        | -                                           | 4.25E-02        | -                         | 8.51E-02        | +                  | 1.83E-01        | +                 | 8.83E-02 | +                                                                                 | 2.50E-01        |
| rs4771122                               | <i>MTIF3</i>           | g       | a | -                           | 4.91E-01        | -                           | 5.64E-01        | +                         | 4.00E-01 | +                          | 8.88E-01 | +                          | 1.76E-01        | -                                           | 9.78E-01        | +                         | 8.16E-01        | +                  | 3.61E-01        | +                 | 3.27E-01 | +                                                                                 | 5.51E-01        |
| rs4836133                               | <i>ZNF608</i>          | a       | c | -                           | 5.65E-01        | -                           | 8.62E-02        | +                         | 1.34E-01 | +                          | 7.12E-01 | +                          | 1.14E-01        | -                                           | 1.43E-01        | -                         | 2.27E-01        | +                  | 3.13E-02        | +                 | 1.12E-01 | +                                                                                 | 6.44E-01        |
| rs4929949                               | <i>RPL27A</i>          | c       | t | +                           | 4.54E-01        | +                           | 9.14E-01        | -                         | 1.00E-01 | +                          | 2.60E-01 | +                          | 1.67E-02        | +                                           | 1.25E-01        | +                         | 6.62E-02        | +                  | 2.28E-02        | +                 | 2.43E-01 | +                                                                                 | 4.54E-01        |
| rs206936                                | <i>NUDT3</i>           | g       | a | -                           | 8.40E-01        | +                           | 2.07E-01        | +                         | 1.52E-01 | +                          | 6.78E-01 | -                          | 8.72E-01        | -                                           | 1.92E-01        | -                         | 2.68E-01        | -                  | 7.14E-01        | -                 | 6.02E-01 | -                                                                                 | 1.28E-01        |

Association results for HDL-, LDL- Cholesterol levels were obtained from publicly available data of the GLOBAL Lipids Genetics Consortium (<http://www.sph.umich.edu/csg/abecasis/public/lipids2008/>)

Association results for fasting insulin and glucose, 2hr-glucose, HOMA-IR and HOMA-B were obtained from the MAGIC (Dupuis et al Nature Genetics 2010; Saxena et al Nature Genetics 2010)

Association results for risk of type 2 diabetes were obtained from the DIAGRAM consortium (Zeggini et al Nature Genetics 2010)

Supplementary Table 5. Gene set enrichment analysis (MAGENTA) of biological pathways with one or more genes from the 32 confirmed BMI loci, using the BMI meta-analysis.

| Database          | Gene set                                                            | Original # genes in gene set | # genes in gene set analyzed by MAGENTA | Nominal GSEA P value | FDR q-value   | # genes expected above 75 <sup>th</sup> percentile cutoff | # genes observed above 75 <sup>th</sup> percentile cutoff | Genes within 300 kb from the 32 confirmed BMI SNPs                                                                                                     |
|-------------------|---------------------------------------------------------------------|------------------------------|-----------------------------------------|----------------------|---------------|-----------------------------------------------------------|-----------------------------------------------------------|--------------------------------------------------------------------------------------------------------------------------------------------------------|
| KEGG              | ADIPOCYTOKINE SIGNALING PATHWAY                                     | 70                           | 67                                      | 0.0095               | 0.2049        | 17                                                        | 26                                                        | NFKB1; POMC                                                                                                                                            |
| KEGG              | GAP JUNCTION                                                        | 92                           | 87                                      | 0.0161               | 0.2312        | 22                                                        | 31                                                        | ADCY3; MAP2K5                                                                                                                                          |
| KEGG              | FOCAL ADHESION                                                      | 206                          | 194                                     | 0.021                | 0.2529        | 49                                                        | 61                                                        | GRLF1; VASP                                                                                                                                            |
| KEGG              | MAPK SIGNALING PATHWAY                                              | 269                          | 246                                     | 0.0254               | 0.2011        | 62                                                        | 75                                                        | BDNF; NFKB1; MAP2K5                                                                                                                                    |
| KEGG              | T CELL RECEPTOR SIGNALING PATHWAY                                   | 97                           | 91                                      | 0.0315               | 0.1720        | 23                                                        | 31                                                        | NFKB1; LAT                                                                                                                                             |
| KEGG              | PHOSPHATIDYLINOSITOL SIGNALING SYSTEM                               | 92                           | 91                                      | 0.0328               | 0.1504        | 23                                                        | 31                                                        | DGKG; DMPK                                                                                                                                             |
| KEGG              | INOSITOL PHOSPHATE METABOLISM                                       | 64                           | 63                                      | 0.0494               | 0.1891        | 16                                                        | 22                                                        | DMPK                                                                                                                                                   |
| Ingenuity         | T CELL RECEPTOR SIGNALING                                           | 34                           | 33                                      | 0.009                | 0.1299        | 8                                                         | 15                                                        | LAT                                                                                                                                                    |
| Ingenuity         | NFKB SIGNALING                                                      | 43                           | 40                                      | 0.0515               | 0.4614        | 10                                                        | 15                                                        | NFKB1                                                                                                                                                  |
| Panther           | <b>PDGF SIGNALING PATHWAY</b>                                       | <b>52</b>                    | <b>43</b>                               | <b>0.0008</b>        | <b>0.0061</b> | <b>11</b>                                                 | <b>21</b>                                                 | <b>SPDEF</b>                                                                                                                                           |
| Panther           | AXON GUIDANCE MEDIATED BY NETRIN                                    | 16                           | 16                                      | 0.0064               | 0.0321        | 4                                                         | 9                                                         | VASP                                                                                                                                                   |
| Panther           | P53 PATHWAY                                                         | 59                           | 55                                      | 0.041                | 0.2195        | 14                                                        | 20                                                        | NFATC2IP                                                                                                                                               |
| PANTHER, BP       | <b>PROTEIN PHOSPHORYLATION</b>                                      | <b>660</b>                   | <b>562</b>                              | <b>0.0001</b>        | <b>0.0453</b> | <b>141</b>                                                | <b>173</b>                                                | <b>DMPK; PRKD1; MAP2K5; COL4A3BP; PACSIN1; TNNT3; STK33; FLJ40125</b>                                                                                  |
| PANTHER, BP       | PRE-MRNA PROCESSING                                                 | 39                           | 27                                      | 0.0016               | 0.0411        | 7                                                         | 14                                                        | SNRPD2                                                                                                                                                 |
| PANTHER, BP       | RECEPTOR PROTEIN TYROSINE KINASE SIGNALING PATHWAY                  | 211                          | 182                                     | 0.014                | 0.3222        | 46                                                        | 59                                                        | BDNF                                                                                                                                                   |
| PANTHER, BP       | INTRACELLULAR SIGNALING CASCADE                                     | 261                          | 225                                     | 0.0184               | 0.3723        | 56                                                        | 70                                                        | RACGAP1; RBJ                                                                                                                                           |
| PANTHER, BP       | DNA REPAIR                                                          | 169                          | 138                                     | 0.0236               | 0.3657        | 35                                                        | 45                                                        | ERCC1; POLK                                                                                                                                            |
| PANTHER, BP       | OTHER INTRACELLULAR SIGNALING CASCADE                               | 225                          | 192                                     | 0.0266               | 0.3623        | 48                                                        | 60                                                        | DGKG; PACSIN1; FLJ40125                                                                                                                                |
| PANTHER, BP       | NEUROGENESIS                                                        | 587                          | 477                                     | 0.0326               | 0.3476        | 119                                                       | 136                                                       | BDNF; FOXA3; RTN2; MADD; ZNF608; IRX3; NEGR1; LBXCOR1                                                                                                  |
| PANTHER, BP       | CELL STRUCTURE                                                      | 687                          | 475                                     | 0.0373               | 0.3454        | 119                                                       | 135                                                       | DMPK; FOXA3; LIN7C                                                                                                                                     |
| PANTHER, BP       | JNK CASCADE                                                         | 61                           | 58                                      | 0.0382               | 0.3785        | 15                                                        | 21                                                        | MADD                                                                                                                                                   |
| PANTHER, BP       | LIPID AND FATTY ACID TRANSPORT                                      | 131                          | 98                                      | 0.046                | 0.3127        | 25                                                        | 32                                                        | COL4A3BP                                                                                                                                               |
| PANTHER, BP       | LIPID METABOLISM                                                    | 151                          | 129                                     | 0.0489               | 0.3391        | 32                                                        | 41                                                        | DGKG; LASS5                                                                                                                                            |
| PANTHER, MF       | <b>HOMEBOX TRANSCRIPTION FACTOR</b>                                 | <b>249</b>                   | <b>155</b>                              | <b>0.0001</b>        | <b>0.0110</b> | <b>39</b>                                                 | <b>59</b>                                                 | <b>MEIS3; IRX3; SIX5</b>                                                                                                                               |
| PANTHER, MF       | <b>TRANSLATION ELONGATION FACTOR</b>                                | <b>33</b>                    | <b>15</b>                               | <b>0.0008</b>        | <b>0.0066</b> | <b>4</b>                                                  | <b>10</b>                                                 | <b>TUFM</b>                                                                                                                                            |
| PANTHER, MF       | RNA HELICASE                                                        | 83                           | 63                                      | 0.0135               | 0.1787        | 16                                                        | 24                                                        | DHX34                                                                                                                                                  |
| PANTHER, MF       | KINASE                                                              | 30                           | 29                                      | 0.0166               | 0.2281        | 7                                                         | 13                                                        | DGKG                                                                                                                                                   |
| PANTHER, MF       | PROTEIN KINASE                                                      | 191                          | 163                                     | 0.0179               | 0.1748        | 41                                                        | 53                                                        | MAP2K5; COL4A3BP; TNNT3                                                                                                                                |
| PANTHER, MF       | DNA METHYLTRANSFERASE                                               | 16                           | 16                                      | 0.0259               | 0.1842        | 4                                                         | 8                                                         | DNMT3A                                                                                                                                                 |
| PANTHER, MF       | G-PROTEIN MODULATOR                                                 | 35                           | 25                                      | 0.0292               | 0.1722        | 6                                                         | 11                                                        | RACGAP1                                                                                                                                                |
| PANTHER, MF       | VOLTAGE-GATED POTASSIUM CHANNEL                                     | 91                           | 82                                      | 0.0388               | 0.2595        | 21                                                        | 28                                                        | KCNH3                                                                                                                                                  |
| Gene Ontology, BP | <b>NEUROGENESIS</b>                                                 | <b>93</b>                    | <b>90</b>                               | <b>0.0001</b>        | <b>0.0214</b> | <b>23</b>                                                 | <b>39</b>                                                 | <b>NRXN3; RACGAP1</b>                                                                                                                                  |
| Gene Ontology, BP | <b>NEURON DIFFERENTIATION</b>                                       | <b>76</b>                    | <b>73</b>                               | <b>0.0001</b>        | <b>0.0324</b> | <b>18</b>                                                 | <b>32</b>                                                 | <b>NRXN3</b>                                                                                                                                           |
| Gene Ontology, BP | <b>GENERATION OF NEURONS</b>                                        | <b>83</b>                    | <b>80</b>                               | <b>0.0002</b>        | <b>0.0335</b> | <b>20</b>                                                 | <b>34</b>                                                 | <b>NRXN3; RACGAP1</b>                                                                                                                                  |
| Gene Ontology, BP | <b>REGULATION OF CELLULAR METABOLIC PROCESS</b>                     | <b>782</b>                   | <b>714</b>                              | <b>0.0002</b>        | <b>0.0308</b> | <b>179</b>                                                | <b>214</b>                                                | <b>ERCC1; FOSB; GRLF1; HMGA1; SMARCD1; SPI1; SPN; TFAP2B; IGF2BP2; AKTIP; MTIF3</b>                                                                    |
| Gene Ontology, BP | BIOPOLYMER METABOLIC PROCESS                                        | 1674                         | 1458                                    | 0.0003               | 0.0349        | 365                                                       | 408                                                       | DMPK; DNMT3A; ERCC1; FOSB; GTF3A; HMGA1; NFKB1; PRKD1; SFRS10; SMARCD1; SNRPD2; SPI1; TFAP2B; TUFM; SAE1; COL4A3BP; MCRS1; CUGBP1; CD3EAP; POLK; AKTIP |
| Gene Ontology, BP | GROWTH                                                              | 76                           | 74                                      | 0.0003               | 0.0256        | 19                                                        | 32                                                        | NDUFS3; BBC3                                                                                                                                           |
| Gene Ontology, BP | TRANSMISSION OF NERVE IMPULSE                                       | 188                          | 171                                     | 0.0006               | 0.0311        | 43                                                        | 61                                                        | GRM4; RAPSN                                                                                                                                            |
| Gene Ontology, BP | REGULATION OF METABOLIC PROCESS                                     | 794                          | 723                                     | 0.0007               | 0.0298        | 181                                                       | 216                                                       | ERCC1; FOSB; GRLF1; HMGA1; SMARCD1; SPI1; SPN; TFAP2B; IGF2BP2; AKTIP; MTIF3                                                                           |
| Gene Ontology, BP | NEURON DEVELOPMENT                                                  | 61                           | 59                                      | 0.001                | 0.0291        | 15                                                        | 26                                                        | NRXN3                                                                                                                                                  |
| Gene Ontology, BP | NERVOUS SYSTEM DEVELOPMENT                                          | 379                          | 333                                     | 0.0013               | 0.0353        | 83                                                        | 107                                                       | BDNF; NPAS1; TFAP2B; NRXN3; RACGAP1                                                                                                                    |
| Gene Ontology, BP | NUCLEOBASE NUCLEOSIDE NUCLEOTIDE AND NUCLEIC ACID METABOLIC PROCESS | 1235                         | 1095                                    | 0.0014               | 0.0348        | 274                                                       | 310                                                       | DNMT3A; ERCC1; FOSB; GRLF1; GTF3A; HMGA1; NFKB1; SFRS10; SMARCD1; SNRPD2; SPI1; TFAP2B; CUGBP1; CD3EAP; NUDT3; POLK                                    |
| Gene Ontology, BP | NEURITE DEVELOPMENT                                                 | 53                           | 51                                      | 0.0016               | 0.0297        | 13                                                        | 23                                                        | NRXN3                                                                                                                                                  |
| Gene Ontology, BP | REGULATION OF GROWTH                                                | 57                           | 55                                      | 0.0016               | 0.0335        | 14                                                        | 24                                                        | NDUFS3; BBC3                                                                                                                                           |
| Gene Ontology, BP | REGULATION OF GENE EXPRESSION                                       | 669                          | 617                                     | 0.0018               | 0.0461        | 154                                                       | 183                                                       | DNMT3A; FOSB; GRLF1; HMGA1; SMARCD1; SPI1; SPN; TFAP2B; IGF2BP2; MTIF3                                                                                 |
| Gene Ontology, BP | AXONOGENESIS                                                        | 43                           | 41                                      | 0.0021               | 0.0362        | 10                                                        | 19                                                        | NRXN3                                                                                                                                                  |
| Gene Ontology, BP | CELL DEVELOPMENT                                                    | 575                          | 541                                     | 0.0022               | 0.0411        | 135                                                       | 163                                                       | GRM4; NDUFS3; NFKB1; MADD; NRXN3; BBC3; RACGAP1                                                                                                        |

Supplementary Table 5

| Database          | Gene set                                                                                   | Original # genes in gene set | # genes in gene set analyzed by MAGENTA | Nominal GSEA P value | FDR q-value | # genes expected above 75 <sup>th</sup> percentile cutoff | # genes observed above 75 <sup>th</sup> percentile cutoff | Genes within 300 kb from the 32 confirmed BMI SNPs                                                       |
|-------------------|--------------------------------------------------------------------------------------------|------------------------------|-----------------------------------------|----------------------|-------------|-----------------------------------------------------------|-----------------------------------------------------------|----------------------------------------------------------------------------------------------------------|
| Gene Ontology, BP | PROTEIN METABOLIC PROCESS                                                                  | 1220                         | 1079                                    | 0.0022               | 0.0470      | 270                                                       | 304                                                       | DMPK; HMGA1; PRKD1; RPL21; RPL27A; RPS10; SPN; TUFM; SAE1; COL4A3BP; MCRS1; IGF2BP2; CHST8; AKTIP; MTIF3 |
| Gene Ontology, BP | CELLULAR COMPONENT ASSEMBLY                                                                | 295                          | 277                                     | 0.0025               | 0.0473      | 69                                                        | 89                                                        | AP2S1; HMGA1; SNRPD2; CUGBP1; MTIF3                                                                      |
| Gene Ontology, BP | MACROMOLECULAR COMPLEX ASSEMBLY                                                            | 277                          | 260                                     | 0.0025               | 0.0475      | 65                                                        | 85                                                        | HMGA1; SNRPD2; CUGBP1; MTIF3                                                                             |
| Gene Ontology, BP | T CELL ACTIVATION                                                                          | 44                           | 40                                      | 0.0026               | 0.0400      | 10                                                        | 15                                                        | LAT                                                                                                      |
| Gene Ontology, BP | NEGATIVE REGULATION OF CELL ADHESION                                                       | 17                           | 17                                      | 0.0037               | 0.0342      | 4                                                         | 10                                                        | SPN                                                                                                      |
| Gene Ontology, BP | CELL ACTIVATION                                                                            | 75                           | 70                                      | 0.0048               | 0.0483      | 18                                                        | 28                                                        | LAT                                                                                                      |
| Gene Ontology, BP | CELLULAR MACROMOLECULE METABOLIC PROCESS                                                   | 1121                         | 996                                     | 0.0048               | 0.0666      | 249                                                       | 278                                                       | DMPK; HMGA1; PRKD1; RPL21; RPL27A; RPS10; SPN; TUFM; SAE1; COL4A3BP; MCRS1; IGF2BP2; CHST8; AKTIP; MTIF3 |
| Gene Ontology, BP | REGULATION OF MOLECULAR FUNCTION                                                           | 324                          | 302                                     | 0.0048               | 0.0525      | 76                                                        | 96                                                        | C5AR1; GIPR; GRM4; MADD; BBC3; AKTIP                                                                     |
| Gene Ontology, BP | REGULATION OF MULTICELLULAR ORGANISMAL PROCESS                                             | 150                          | 140                                     | 0.0052               | 0.0548      | 35                                                        | 49                                                        | ATP2A1; DMPK; MC4R; MYBPC3; LAT                                                                          |
| Gene Ontology, BP | REGULATION OF DEVELOPMENTAL PROCESS                                                        | 437                          | 408                                     | 0.0056               | 0.0628      | 102                                                       | 124                                                       | GRM4; NDUFS3; NFKB1; SPI1; MADD; BBC3                                                                    |
| Gene Ontology, BP | REGULATION OF NUCLEOBASE NUCLEOSIDE NUCLEOTIDE AND NUCLEIC ACID METABOLIC PROCESS          | 615                          | 567                                     | 0.0061               | 0.0640      | 142                                                       | 166                                                       | ERCC1; FOSB; GRLF1; HMGA1; SMARCD1; SPI1; TFAP2B                                                         |
| Gene Ontology, BP | CELLULAR PROTEIN METABOLIC PROCESS                                                         | 1107                         | 986                                     | 0.0064               | 0.0622      | 247                                                       | 275                                                       | DMPK; HMGA1; PRKD1; RPL21; RPL27A; RPS10; SPN; TUFM; SAE1; COL4A3BP; MCRS1; IGF2BP2; CHST8; AKTIP; MTIF3 |
| Gene Ontology, BP | NEGATIVE REGULATION OF GROWTH                                                              | 39                           | 38                                      | 0.0066               | 0.0522      | 10                                                        | 17                                                        | NDUFS3; BBC3                                                                                             |
| Gene Ontology, BP | POSITIVE REGULATION OF BIOLOGICAL PROCESS                                                  | 707                          | 657                                     | 0.0066               | 0.0653      | 164                                                       | 190                                                       | ATP2A1; GRM4; HMGA1; MC4R; NDUFS3; SMARCD1; SPI1; SPN; TFAP2B; BBC3; AKTIP                               |
| Gene Ontology, BP | REGULATION OF APOPTOSIS                                                                    | 339                          | 319                                     | 0.0066               | 0.0683      | 80                                                        | 99                                                        | GRM4; NDUFS3; NFKB1; MADD; BBC3                                                                          |
| Gene Ontology, BP | REGULATION OF PROGRAMMED CELL DEATH                                                        | 340                          | 320                                     | 0.0066               | 0.0645      | 80                                                        | 99                                                        | GRM4; NDUFS3; NFKB1; MADD; BBC3                                                                          |
| Gene Ontology, BP | CELLULAR MORPHOGENESIS DURING DIFFERENTIATION                                              | 49                           | 47                                      | 0.0071               | 0.0545      | 12                                                        | 20                                                        | NRXN3                                                                                                    |
| Gene Ontology, BP | REGULATION OF CELLULAR PROTEIN METABOLIC PROCESS                                           | 161                          | 150                                     | 0.0071               | 0.0632      | 38                                                        | 51                                                        | SPN; IGF2BP2; AKTIP; MTIF3                                                                               |
| Gene Ontology, BP | REGULATION OF TRANSCRIPTION                                                                | 563                          | 519                                     | 0.0083               | 0.0720      | 130                                                       | 152                                                       | FOSB; GRLF1; HMGA1; SMARCD1; SPI1; TFAP2B                                                                |
| Gene Ontology, BP | LYMPHOCYTE ACTIVATION                                                                      | 60                           | 55                                      | 0.0086               | 0.0637      | 14                                                        | 22                                                        | LAT                                                                                                      |
| Gene Ontology, BP | REGULATION OF LYMPHOCYTE ACTIVATION                                                        | 35                           | 34                                      | 0.0092               | 0.0650      | 9                                                         | 15                                                        | LAT                                                                                                      |
| Gene Ontology, BP | MAPK KINASE CASCADE GO 0000165                                                             | 103                          | 97                                      | 0.0096               | 0.0664      | 24                                                        | 35                                                        | C5AR1; GRM4; MADD                                                                                        |
| Gene Ontology, BP | REGULATION OF CELL ADHESION                                                                | 36                           | 36                                      | 0.0098               | 0.0634      | 9                                                         | 16                                                        | SPN                                                                                                      |
| Gene Ontology, BP | REGULATION OF BIOLOGICAL QUALITY                                                           | 416                          | 372                                     | 0.0104               | 0.0786      | 93                                                        | 112                                                       | C5AR1; GRM4; MC4R; NDUFS3; SPI1                                                                          |
| Gene Ontology, BP | REGULATION OF IMMUNE SYSTEM PROCESS                                                        | 67                           | 62                                      | 0.0104               | 0.0690      | 16                                                        | 24                                                        | LAT                                                                                                      |
| Gene Ontology, BP | POSITIVE REGULATION OF CELLULAR METABOLIC PROCESS                                          | 227                          | 215                                     | 0.0106               | 0.0728      | 54                                                        | 69                                                        | HMGA1; SMARCD1; SPI1; SPN; TFAP2B; AKTIP                                                                 |
| Gene Ontology, BP | POSITIVE REGULATION OF METABOLIC PROCESS                                                   | 234                          | 220                                     | 0.0108               | 0.0787      | 55                                                        | 70                                                        | HMGA1; SMARCD1; SPI1; SPN; TFAP2B; AKTIP                                                                 |
| Gene Ontology, BP | NEGATIVE REGULATION OF CATALYTIC ACTIVITY                                                  | 68                           | 65                                      | 0.0111               | 0.0650      | 16                                                        | 25                                                        | GRM4                                                                                                     |
| Gene Ontology, BP | APOPTOSIS GO                                                                               | 429                          | 403                                     | 0.0115               | 0.0791      | 101                                                       | 120                                                       | GRM4; NDUFS3; NFKB1; MADD; BBC3                                                                          |
| Gene Ontology, BP | POSITIVE REGULATION OF CELLULAR PROCESS                                                    | 666                          | 621                                     | 0.0129               | 0.0826      | 155                                                       | 178                                                       | GRM4; HMGA1; NDUFS3; SMARCD1; SPI1; SPN; TFAP2B; BBC3; AKTIP                                             |
| Gene Ontology, BP | REGULATION OF CATALYTIC ACTIVITY                                                           | 276                          | 261                                     | 0.0129               | 0.0804      | 65                                                        | 81                                                        | C5AR1; GIPR; GRM4; MADD; BBC3                                                                            |
| Gene Ontology, BP | NUCLEOTIDE EXCISION REPAIR                                                                 | 20                           | 20                                      | 0.0131               | 0.0695      | 5                                                         | 10                                                        | ERCC1                                                                                                    |
| Gene Ontology, BP | REGULATION OF PROTEIN METABOLIC PROCESS                                                    | 172                          | 159                                     | 0.0133               | 0.0801      | 40                                                        | 52                                                        | SPN; IGF2BP2; AKTIP; MTIF3                                                                               |
| Gene Ontology, BP | PROGRAMMED CELL DEATH                                                                      | 430                          | 404                                     | 0.014                | 0.0808      | 101                                                       | 120                                                       | GRM4; NDUFS3; NFKB1; MADD; BBC3                                                                          |
| Gene Ontology, BP | POST TRANSLATIONAL PROTEIN MODIFICATION                                                    | 474                          | 443                                     | 0.0152               | 0.0880      | 111                                                       | 130                                                       | DMPK; PRKD1; SAE1; COL4A3BP; AKTIP                                                                       |
| Gene Ontology, BP | LEUKOCYTE ACTIVATION                                                                       | 68                           | 63                                      | 0.0157               | 0.0803      | 16                                                        | 24                                                        | LAT                                                                                                      |
| Gene Ontology, BP | REGULATION OF KINASE ACTIVITY                                                              | 156                          | 150                                     | 0.0163               | 0.0875      | 38                                                        | 49                                                        | C5AR1; GRM4; MADD                                                                                        |
| Gene Ontology, BP | PHOSPHORYLATION                                                                            | 311                          | 290                                     | 0.0168               | 0.0932      | 73                                                        | 88                                                        | DMPK; PRKD1; COL4A3BP; AKTIP                                                                             |
| Gene Ontology, BP | ESTABLISHMENT AND OR MAINTENANCE OF CHROMATIN ARCHITECTURE                                 | 76                           | 70                                      | 0.0187               | 0.0857      | 18                                                        | 26                                                        | HMGA1; SMARCD1                                                                                           |
| Gene Ontology, BP | RNA METABOLIC PROCESS                                                                      | 836                          | 759                                     | 0.0194               | 0.1008      | 190                                                       | 212                                                       | FOSB; GTF3A; HMGA1; NFKB1; SFRS10; SMARCD1; SNRPD2; SPI1; TFAP2B; CUGBP1; CD3EAP                         |
| Gene Ontology, BP | TRANSCRIPTION                                                                              | 748                          | 687                                     | 0.0199               | 0.1005      | 172                                                       | 193                                                       | FOSB; GRLF1; GTF3A; NFKB1; SMARCD1; SPI1; TFAP2B; CD3EAP                                                 |
| Gene Ontology, BP | REGULATION OF PROTEIN KINASE ACTIVITY                                                      | 154                          | 148                                     | 0.0206               | 0.1020      | 37                                                        | 48                                                        | C5AR1; GRM4; MADD                                                                                        |
| Gene Ontology, BP | POTASSIUM ION TRANSPORT                                                                    | 58                           | 52                                      | 0.0218               | 0.0879      | 13                                                        | 20                                                        | KCNH3                                                                                                    |
| Gene Ontology, BP | RESPONSE TO NUTRIENT LEVELS                                                                | 28                           | 27                                      | 0.0226               | 0.0820      | 7                                                         | 12                                                        | GIPR                                                                                                     |
| Gene Ontology, BP | DNA REPAIR                                                                                 | 123                          | 117                                     | 0.0234               | 0.1025      | 29                                                        | 39                                                        | ERCC1                                                                                                    |
| Gene Ontology, BP | REGULATION OF CELL GROWTH                                                                  | 45                           | 43                                      | 0.0237               | 0.0942      | 11                                                        | 17                                                        | NDUFS3                                                                                                   |
| Gene Ontology, BP | REGULATION OF TRANSCRIPTION DNA DEPENDENT                                                  | 459                          | 428                                     | 0.0237               | 0.1114      | 107                                                       | 124                                                       | FOSB; HMGA1; SMARCD1; SPI1; TFAP2B                                                                       |
| Gene Ontology, BP | POSITIVE REGULATION OF CELLULAR PROTEIN METABOLIC PROCESS                                  | 73                           | 69                                      | 0.0255               | 0.1032      | 17                                                        | 25                                                        | SPN; AKTIP                                                                                               |
| Gene Ontology, BP | HOMEOSTASIS OF NUMBER OF CELLS                                                             | 20                           | 19                                      | 0.0271               | 0.0886      | 5                                                         | 9                                                         | SPI1                                                                                                     |
| Gene Ontology, BP | POSITIVE REGULATION OF CATALYTIC ACTIVITY                                                  | 165                          | 157                                     | 0.0281               | 0.1125      | 39                                                        | 50                                                        | C5AR1; GIPR; GRM4; MADD; BBC3                                                                            |
| Gene Ontology, BP | UBIQUITIN CYCLE                                                                            | 48                           | 47                                      | 0.0292               | 0.1027      | 12                                                        | 18                                                        | SAE1                                                                                                     |
| Gene Ontology, BP | POSITIVE REGULATION OF NUCLEOBASE NUCLEOSIDE NUCLEOTIDE AND NUCLEIC ACID METABOLIC PROCESS | 153                          | 147                                     | 0.0299               | 0.1133      | 37                                                        | 47                                                        | HMGA1; SMARCD1; SPI1; TFAP2B                                                                             |
| Gene Ontology, BP | BIOPOLYMER MODIFICATION                                                                    | 648                          | 599                                     | 0.0304               | 0.1186      | 150                                                       | 168                                                       | DMPK; DNMT3A; PRKD1; SAE1; COL4A3BP; MCRS1; AKTIP                                                        |
| Gene Ontology, BP | POSITIVE REGULATION OF TRANSFERASE ACTIVITY                                                | 86                           | 84                                      | 0.0315               | 0.1131      | 21                                                        | 29                                                        | C5AR1; GRM4; MADD                                                                                        |
| Gene Ontology, BP | REGULATION OF TRANSLATION                                                                  | 92                           | 87                                      | 0.0323               | 0.1132      | 22                                                        | 30                                                        | SPN; IGF2BP2; MTIF3                                                                                      |



Supplementary Table 5

| Database                 | Gene set                                                              | Original # genes in gene set | # genes in gene set analyzed by MAGENTA | Nominal GSEA <i>p</i> value | FDR <i>q</i> -value | # genes expected above 75 <sup>th</sup> percentile cutoff | # genes observed above 75 <sup>th</sup> percentile cutoff | Genes within 300 kb from the 32 confirmed BMI SNPs                   |
|--------------------------|-----------------------------------------------------------------------|------------------------------|-----------------------------------------|-----------------------------|---------------------|-----------------------------------------------------------|-----------------------------------------------------------|----------------------------------------------------------------------|
| Gene Ontology, BP        | REGULATION OF CELLULAR COMPONENT ORGANIZATION AND BIOGENESIS          | 124                          | 119                                     | 0.0324                      | 0.1146              | 30                                                        | 39                                                        | AP2S1; ERCC1; MTF13                                                  |
| Gene Ontology, BP        | CHROMATIN MODIFICATION                                                | 54                           | 51                                      | 0.0327                      | 0.1108              | 13                                                        | 19                                                        | HMGA1; SMARCD1                                                       |
| Gene Ontology, BP        | ACTIVATION OF MAPK ACTIVITY                                           | 41                           | 41                                      | 0.0328                      | 0.1088              | 10                                                        | 16                                                        | CSAR1; GRM4; MADD                                                    |
| Gene Ontology, BP        | POSITIVE REGULATION OF PROTEIN MODIFICATION PROCESS                   | 29                           | 29                                      | 0.033                       | 0.1083              | 7                                                         | 12                                                        | AKTIP                                                                |
| Gene Ontology, BP        | POSITIVE REGULATION OF TRANSCRIPTION                                  | 143                          | 137                                     | 0.0332                      | 0.1188              | 34                                                        | 44                                                        | HMGA1; SMARCD1; SPI1; TFAP2B                                         |
| Gene Ontology, BP        | REGULATION OF TRANSFERASE ACTIVITY                                    | 160                          | 154                                     | 0.0333                      | 0.1146              | 39                                                        | 49                                                        | CSAR1; GRM4; MADD                                                    |
| Gene Ontology, BP        | CELL CYCLE PROCESS                                                    | 192                          | 183                                     | 0.0334                      | 0.1200              | 46                                                        | 57                                                        | RACGAP1                                                              |
| Gene Ontology, BP        | POSITIVE REGULATION OF PROTEIN METABOLIC PROCESS                      | 75                           | 71                                      | 0.0340                      | 0.1130              | 18                                                        | 25                                                        | SPN; AKTIP                                                           |
| Gene Ontology, BP        | POSITIVE REGULATION OF DEVELOPMENTAL PROCESS                          | 218                          | 209                                     | 0.0343                      | 0.1174              | 52                                                        | 64                                                        | NDUFS3; BBC3                                                         |
| Gene Ontology, BP        | GENERATION OF PRECURSOR METABOLITES AND ENERGY                        | 122                          | 113                                     | 0.0350                      | 0.1178              | 28                                                        | 37                                                        | GIPR; POMC                                                           |
| Gene Ontology, BP        | NEGATIVE REGULATION OF CELLULAR COMPONENT ORGANIZATION AND BIOGENESIS | 28                           | 26                                      | 0.0379                      | 0.1118              | 7                                                         | 11                                                        | ERCC1                                                                |
| Gene Ontology, BP        | REGULATION OF RNA METABOLIC PROCESS                                   | 469                          | 437                                     | 0.0381                      | 0.1294              | 109                                                       | 125                                                       | FOSB; HMGA1; SMARCD1; SPI1; TFAP2B                                   |
| Gene Ontology, BP        | OXYGEN AND REACTIVE OXYGEN SPECIES METABOLIC PROCESS                  | 20                           | 20                                      | 0.0405                      | 0.1116              | 5                                                         | 9                                                         | NDUFS3                                                               |
| Gene Ontology, BP        | NEURON APOPTOSIS                                                      | 17                           | 17                                      | 0.0408                      | 0.1087              | 4                                                         | 8                                                         | GRM4                                                                 |
| Gene Ontology, BP        | POSITIVE REGULATION OF BINDING                                        | 28                           | 26                                      | 0.0435                      | 0.1138              | 7                                                         | 11                                                        | AKTIP                                                                |
| Gene Ontology, BP        | PROTEIN UBIQUITINATION                                                | 40                           | 39                                      | 0.0443                      | 0.1209              | 10                                                        | 15                                                        | SAE1                                                                 |
| Gene Ontology, BP        | PROTEIN MODIFICATION PROCESS                                          | 629                          | 582                                     | 0.0446                      | 0.1481              | 146                                                       | 162                                                       | DMPK; PRKD1; SAE1; COL4A3BP; MCRS1; AKTIP                            |
| Gene Ontology, BP        | PROTEIN AMINO ACID PHOSPHORYLATION                                    | 277                          | 260                                     | 0.0462                      | 0.1518              | 65                                                        | 77                                                        | DMPK; PRKD1; COL4A3BP; AKTIP                                         |
| Gene Ontology, BP        | CHROMOSOME ORGANIZATION AND BIOGENESIS                                | 123                          | 115                                     | 0.0476                      | 0.1437              | 29                                                        | 37                                                        | ERCC1; HMGA1; SMARCD1                                                |
| Gene Ontology, BP        | CELL CELL SIGNALING                                                   | 403                          | 362                                     | 0.0483                      | 0.1524              | 91                                                        | 104                                                       | GRM4; POMC; RAPSIN; NUDT3                                            |
| Gene Ontology, BP        | PROTEIN COMPLEX ASSEMBLY                                              | 166                          | 158                                     | 0.0483                      | 0.1458              | 40                                                        | 49                                                        | HMGA1                                                                |
| Gene Ontology, BP        | SYNAPTIC TRANSMISSION                                                 | 173                          | 156                                     | 0.0487                      | 0.1668              | 39                                                        | 55                                                        | GRM4; RAPSIN                                                         |
| Gene Ontology, BP        | POSITIVE REGULATION OF MAPKKK CASCADE                                 | 11                           | 9                                       | 0.049                       | 0.1015              | 2                                                         | 5                                                         | GRM4                                                                 |
| <b>Gene Ontology, MF</b> | <b>HORMONE RECEPTOR BINDING</b>                                       | <b>29</b>                    | <b>27</b>                               | <b>0.0002</b>               | <b>0.0082</b>       | <b>7</b>                                                  | <b>16</b>                                                 | <b>HMGA1</b>                                                         |
| <b>Gene Ontology, MF</b> | <b>NUCLEAR HORMONE RECEPTOR BINDING</b>                               | <b>28</b>                    | <b>26</b>                               | <b>0.0005</b>               | <b>0.0085</b>       | <b>7</b>                                                  | <b>15</b>                                                 | <b>HMGA1</b>                                                         |
| Gene Ontology, MF        | KINASE ACTIVITY                                                       | 366                          | 338                                     | 0.0030                      | 0.1568              | 85                                                        | 106                                                       | DGKG; DMPK; PRKD1; COL4A3BP                                          |
| Gene Ontology, MF        | IDENTICAL PROTEIN BINDING                                             | 304                          | 278                                     | 0.0043                      | 0.1243              | 70                                                        | 89                                                        | DMPK                                                                 |
| Gene Ontology, MF        | NUCLEOTIDE BINDING                                                    | 223                          | 207                                     | 0.0074                      | 0.1485              | 52                                                        | 67                                                        | DMPK                                                                 |
| Gene Ontology, MF        | TRANSFERASE ACTIVITY TRANSFERRING PHOSPHORUS CONTAINING GROUPS        | 421                          | 385                                     | 0.0084                      | 0.1805              | 96                                                        | 116                                                       | DGKG; DMPK; PRKD1; COL4A3BP                                          |
| Gene Ontology, MF        | SMALL GTPASE REGULATOR ACTIVITY                                       | 67                           | 64                                      | 0.0099                      | 0.1559              | 16                                                        | 25                                                        | MADD; RASAL2                                                         |
| Gene Ontology, MF        | PURINE RIBONUCLEOTIDE BINDING                                         | 204                          | 190                                     | 0.0144                      | 0.2105              | 48                                                        | 61                                                        | DMPK                                                                 |
| Gene Ontology, MF        | PHOSPHOTRANSFERASE ACTIVITY ALCOHOL GROUP AS ACCEPTOR                 | 332                          | 311                                     | 0.0169                      | 0.1775              | 78                                                        | 94                                                        | DGKG; DMPK; PRKD1; COL4A3BP                                          |
| Gene Ontology, MF        | PURINE NUCLEOTIDE BINDING                                             | 210                          | 195                                     | 0.0169                      | 0.2039              | 49                                                        | 62                                                        | DMPK                                                                 |
| Gene Ontology, MF        | GTPASE REGULATOR ACTIVITY                                             | 124                          | 120                                     | 0.0214                      | 0.1882              | 30                                                        | 40                                                        | MADD; RASAL2; RACGAP1                                                |
| Gene Ontology, MF        | ATP BINDING                                                           | 155                          | 145                                     | 0.0257                      | 0.1912              | 36                                                        | 47                                                        | DMPK                                                                 |
| Gene Ontology, MF        | SUBSTRATE SPECIFIC CHANNEL ACTIVITY                                   | 156                          | 138                                     | 0.0264                      | 0.2050              | 35                                                        | 45                                                        | AQP2; AQP5; AQP6; KCNH3                                              |
| Gene Ontology, MF        | DNA BINDING                                                           | 596                          | 548                                     | 0.0265                      | 0.2003              | 137                                                       | 156                                                       | DNMT3A; ERCC1; ETV5; GRLF1; HMGA1; FOXA3; NFKB1; NPAS1; SPI1; TFAP2B |
| Gene Ontology, MF        | ION CHANNEL ACTIVITY                                                  | 149                          | 132                                     | 0.0271                      | 0.1918              | 33                                                        | 43                                                        | KCNH3                                                                |
| Gene Ontology, MF        | RAS GUANYL NUCLEOTIDE EXCHANGE FACTOR ACTIVITY                        | 19                           | 19                                      | 0.0288                      | 0.1914              | 5                                                         | 9                                                         | MADD                                                                 |
| Gene Ontology, MF        | PROTEIN KINASE ACTIVITY                                               | 283                          | 265                                     | 0.0294                      | 0.1937              | 66                                                        | 80                                                        | DMPK; PRKD1; COL4A3BP                                                |
| Gene Ontology, MF        | RNA BINDING                                                           | 255                          | 236                                     | 0.0358                      | 0.2123              | 59                                                        | 71                                                        | RPL21; RPL27A; RPS10; SFRS10; IGF2BP2; CUGBP1                        |
| Gene Ontology, MF        | ADENYL RIBONUCLEOTIDE BINDING                                         | 162                          | 152                                     | 0.0366                      | 0.2084              | 38                                                        | 48                                                        | DMPK                                                                 |
| Gene Ontology, MF        | ADENYL NUCLEOTIDE BINDING                                             | 168                          | 157                                     | 0.0444                      | 0.2183              | 39                                                        | 49                                                        | DMPK                                                                 |

Nominal gene set enrichment analysis (GSEA) *p*-values and false discovery rates were computed for biological gene-sets that contain at least one gene from the 32 confirmed Body Index Mass (BMI) loci, using MAGENTA. The biological gene-sets were taken from four different resources. Results are presented for the nominally significant pathways (*p* < 0.05). Bonferroni correction was done separately for each database due to considerable overlap of gene sets between databases. The Bonferroni corrected *p*-value cutoffs for the different databases are: KEGG (36 pathways): *p* < 0.0014, Ingenuity (24 pathways): *p* < 0.0021, PANTHER (21 metabolic and signaling pathways): *p* < 0.0024, PANTHER, BP (Biological Processes; 90 gene sets): *p* < 5.6E-04, PANTHER, MF Molecular Functions; 71 gene sets): *p* < 7.0E-04, Gene Ontology (GO) biological process (BP) terms (334 gene sets): *p* < 1.50E-05, and Gene Ontology (GO) molecular function (MF) terms (124 gene sets): *p* < 4.0E-04. In bold are gene sets that pass or are close to the Bonferroni cutoff.

Supplementary Table 6

Supplementary Table 6 - Non-synonymous or splice-site variants in linkage disequilibrium ( $r^2 > 0.75$ ) with lead SNPs.

| Chr | Position    | lead SNP   | Coding SNP | $r^2$ | Gene              | Coding change | Type                   | Information source (map build) |
|-----|-------------|------------|------------|-------|-------------------|---------------|------------------------|--------------------------------|
| 2   | 25,011,512  | rs713586   | rs11676272 | 0.90  | <i>ADCY3</i>      | S107P         | Non-synonymous         | HapMap_r21_CEU                 |
| 4   | 103,407,732 | rs13107325 | rs13107325 | 1.00  | <i>SLC39A8</i>    | A391T         | Non-synonymous         | HapMap_r21_CEU                 |
| 5   | 75,050,998  | rs2112347  | rs2307111  | 0.81  | <i>FLJ35779</i>   | H11R          | Non-synonymous         | HapMap_r21_CEU                 |
| 11  | 27,682,562  | rs10767664 | rs6265     | 0.76  | <i>BDNF</i>       | V66M          | Non-synonymous         | HapMap_r21_CEU                 |
| 11  | 47,607,569  | rs3817334  | rs1064608  | 0.84  | <i>MTCH2</i>      | P290A         | Non-synonymous         | HapMap_r21_CEU                 |
| 15  | 65,873,892  | rs2241423  | rs7170185  | 0.94  | <i>LBXCOR1</i>    | W200R         | Non-synonymous         | 1000G_0904_CEU                 |
| 16  | 28,793,160  | rs7359397  | rs180743   | 0.85  | <i>APOB48R</i>    | P419A         | Non-synonymous         | HapMap_r21_CEU                 |
| 16  | 28,793,160  | rs7359397  | rs7498665  | 1.00  | <i>SH2B1</i>      | T484A         | Non-synonymous         | HapMap_r21_CEU                 |
| 16  | 28,793,160  | rs7359397  | rs1059491  | 0.75  | <i>SULT1A2</i>    | N235T         | Non-synonymous         | 1000G_0904_CEU                 |
| 16  | 28,793,160  | rs7359397  | rs180743   | 0.75  | <i>AC138894.2</i> | P419A         | Non-synonymous         | 1000G_0904_CEU                 |
| 16  | 28,793,160  | rs7359397  | rs55719896 | 1.00  | <i>ATXN2L</i>     | -             | splice site alteration | 1000G_0908_CEU                 |
| 19  | 50,894,012  | rs2287019  | rs1800437  | 0.83  | <i>GIPR</i>       | E354Q         | Non-synonymous         | HapMap_r21_CEU                 |

$r^2$  is the linkage disequilibrium (LD) between the lead SNP, examined in the current study, and the nearby coding SNPs.

Supplementary Table 7 - Significant associations between BMI SNPs and *cis* gene expression (*cis*-eQTLs) in lymphocyte, blood, liver, adipose tissue\*, and brain tissues.

| BMI SNP    | Chr | Position    | BMI increasing allele | Tissue           | Gene                  | Effect <sup>a</sup> | P-value  | P <sub>adj</sub> <sup>b</sup> | Peak SNP <sup>c</sup> | r <sup>2</sup> <sup>d</sup> | P-value   | P <sub>adj</sub> <sup>e</sup> |
|------------|-----|-------------|-----------------------|------------------|-----------------------|---------------------|----------|-------------------------------|-----------------------|-----------------------------|-----------|-------------------------------|
| rs2815752  | 1   | 72,585,028  | A                     | Blood            | <i>NEGR1</i>          | +                   | 3.60E-27 | 0.44                          | rs2568958             | 1.00                        | 1.30E-27  | 0.13                          |
| rs713586   | 2   | 25,011,512  | C                     | Lymphocyte       | <i>ADCY3</i>          | -                   | 1.04E-19 | 0.75                          | rs6737082             | 0.78                        | 1.79E-21  | 0.17                          |
|            |     |             |                       | Omental fat      | <i>ADCY3</i>          | +                   | 5.40E-06 | 0.23                          | rs7608976             | 0.66                        | 1.19E-11  | 0.004                         |
|            |     |             |                       | Blood            | <i>ADCY3</i>          | -                   | 1.70E-08 | 0.04                          | rs478222              | 0.53                        | 3.60E-09  | 0.007                         |
|            |     |             |                       | Adipose          | <i>POMC</i>           | -                   | 4.00E-09 | 3.50E-04                      | rs6734859             | 0.03                        | 6.20E-15  | 8.10E-10                      |
| rs13078807 | 3   | 85,966,840  | G                     | Subcutaneous fat | <i>Contig17333_RC</i> | +                   | 2.74E-17 | 0.002                         | rs9309982             | 0.29                        | 6.51E-24  | 5.27E-08                      |
|            |     |             |                       | Omental fat      | <i>Contig17333_RC</i> | +                   | 1.00E-10 | 0.007                         | rs4364177             | 0.22                        | 5.15E-19  | 1.85E-09                      |
|            |     |             |                       | Adipose          | <i>Contig17333_RC</i> | +                   | 3.00E-08 | 0.001                         | rs17518584            | 0.13                        | 5.50E-11  | 2.30E-06                      |
| rs13107325 | 4   | 103,407,732 | T                     | Liver            | <i>SLC39A8</i>        | -                   | 1.36E-16 | 1.00                          | rs13107325            | 1.00                        | 1.36E-16  | 1.00                          |
| rs2112347  | 5   | 75,050,998  | T                     | Blood            | <i>C5orf37</i>        | -                   | 4.20E-07 | 2.30E-08                      | rs888788              | 0.50                        | 1.80E-36  | 6.70E-38                      |
| rs206936   | 6   | 34,410,847  | G                     | Liver            | <i>NUDT3</i>          | +                   | 2.00E-07 | 0.15                          | rs6911272             | 0.54                        | 5.24E-13  | 9.73E-04                      |
| rs4929949  | 11  | 8,561,169   | C                     | Omental fat      | <i>Contig39122_RC</i> | -                   | 6.14E-16 | 0.88                          | rs10840111            | 0.17                        | 1.77E-109 | 4.94E-74                      |
|            |     |             |                       | Subcutaneous fat | <i>Contig39122_RC</i> | -                   | 3.39E-14 | 0.04                          | rs10840111            | 0.16                        | 6.88E-82  | 6.17E-56                      |
|            |     |             |                       | Liver            | <i>Contig39122_RC</i> | -                   | 2.21E-10 | 0.34                          | rs10840111            | 0.20                        | 4.12E-51  | 1.32E-32                      |
|            |     |             |                       | Adipose          | <i>RPL27A</i>         | -                   | 1.70E-12 | 0.001                         | rs11042036            | 0.13                        | 4.50E-47  | 4.20E-36                      |
|            |     |             |                       | Blood            | <i>STK33</i>          | -                   | 8.90E-16 | 0.003                         | rs7934876             | 0.12                        | 3.90E-36  | 2.60E-22                      |
|            |     |             |                       | Adipose          | <i>TRIM66</i>         | +                   | 2.20E-10 | 0.002                         | rs10840106            | 0.14                        | 2.50E-82  | 1.10E-71                      |
|            |     |             |                       | Blood            | <i>TRIM66</i>         | +                   | 9.80E-08 | 0.04                          | rs10840106            | 0.14                        | 4.90E-86  | 8.20E-78                      |
|            |     |             |                       | Omental fat      | <i>TRIM66</i>         | +                   | 1.50E-07 | 0.54                          | rs10840106            | 0.12                        | 1.54E-45  | 5.49E-34                      |
|            |     |             |                       | Liver            | <i>TRIM66</i>         | +                   | 1.02E-06 | 0.001                         | rs10840106            | 0.11                        | 4.77E-08  | 1.06E-04                      |
| rs10767664 | 11  | 27,682,562  | A                     | Blood            | <i>LGR4</i>           | -                   | 4.50E-07 | 0.36                          | rs11030024            | 0.44                        | 6.60E-09  | 0.003                         |
|            |     |             |                       | Lymphocyte       | <i>LGR4</i>           | -                   | 1.01E-06 | 0.006                         | rs7937671             | 0.10                        | 3.97E-11  | 4.40E-07                      |
| rs3817334  | 11  | 47,607,569  | T                     | Blood            | <i>ACP2</i>           | +                   | 1.50E-07 | 0.31                          | rs2013867             | 0.21                        | 2.40E-30  | 1.40E-23                      |
|            |     |             |                       | Adipose          | <i>CELF1</i>          | +                   | 2.00E-45 | 0.08                          | rs10838738            | 0.84                        | 1.70E-56  | 2.40E-10                      |
|            |     |             |                       | Blood            | <i>CELF1</i>          | +                   | 2.70E-13 | 0.83                          | rs12794570            | 0.82                        | 4.30E-17  | 6.40E-05                      |
|            |     |             |                       | Omental fat      | <i>CUGBP1</i>         | +                   | 2.67E-19 | 0.65                          | rs2290850             | 0.72                        | 9.26E-25  | 0.02                          |
|            |     |             |                       | Lymphocyte       | <i>FNBP4</i>          | +                   | 4.26E-18 | 0.71                          | rs2290851             | 0.65                        | 2.76E-32  | 1.27E-09                      |
|            |     |             |                       | Omental fat      | <i>MTCH2</i>          | +                   | 2.83E-14 | 0.72                          | rs10838738            | 0.78                        | 1.50E-19  | 0.03                          |
|            |     |             |                       | Subcutaneous fat | <i>MTCH2</i>          | +                   | 6.79E-12 | 0.91                          | rs12794570            | 0.76                        | 2.62E-14  | 0.25                          |
|            |     |             |                       | Brain            | <i>MTCH2</i>          | +                   | 7.18E-08 | NA                            | NA                    | NA                          | NA        | NA                            |
|            |     |             |                       | Blood            | <i>MTCH2</i>          | +                   | 3.10E-26 | 0.52                          | rs1317149             | 0.84                        | 7.50E-39  | 1.90E-12                      |
|            |     |             |                       | Adipose          | <i>MTCH2</i>          | +                   | 1.30E-08 | 0.61                          | rs11039433            | 0.84                        | 1.20E-10  | 0.003                         |
|            |     |             |                       | Blood            | <i>MYBPC3</i>         | -                   | 1.70E-18 | 0.86                          | rs4992357             | 0.70                        | 3.50E-33  | 1.10E-14                      |
|            |     |             |                       | Adipose          | <i>MYBPC3</i>         | -                   | 5.50E-14 | 0.81                          | rs755553              | 0.76                        | 1.30E-22  | 2.60E-09                      |
|            |     |             |                       | Lymphocyte       | <i>NDUFS3</i>         | -                   | 2.41E-07 | 0.99                          | rs4752845             | 0.85                        | 3.86E-09  | 0.15                          |
|            |     |             |                       | Blood            | <i>NR1H3</i>          | +                   | 8.30E-06 | 0.43                          | rs7395581             | 0.21                        | 8.40E-12  | 2.50E-07                      |
|            |     |             |                       | Adipose          | <i>NUP160</i>         | +                   | 7.90E-06 | 0.06                          | rs12787112            | 0.84                        | 1.40E-10  | 8.40E-07                      |
| rs4771122  | 13  | 26,918,180  | G                     | Lymphocyte       | <i>GTF3A</i>          | -                   | 6.73E-12 | 0.77                          | rs7988412             | 0.85                        | 5.57E-15  | 0.08                          |
|            |     |             |                       | Blood            | <i>GTF3A</i>          | -                   | 9.50E-21 | 0.54                          | rs7988412             | 0.83                        | 4.00E-22  | 0.02                          |
|            |     |             |                       | Lymphocyte       | <i>POLR1D</i>         | +                   | 6.19E-05 | 5.38E-04                      | rs7097                | 0.00                        | 5.70E-21  | 5.81E-21                      |
| rs2241423  | 15  | 65,873,892  | G                     | Omental fat      | <i>HSS00330420</i>    | +                   | 2.13E-16 | 0.53                          | rs3784700             | 0.63                        | 5.48E-20  | 0.03                          |
|            |     |             |                       | Subcutaneous fat | <i>HSS00330420</i>    | +                   | 5.48E-10 | 0.91                          | rs3784700             | 0.64                        | 1.59E-13  | 0.05                          |
|            |     |             |                       | Omental fat      | <i>MAP2K5</i>         | +                   | 9.97E-12 | 0.91                          | rs12441823            | 0.55                        | 3.27E-20  | 1.31E-04                      |
|            |     |             |                       | Adipose          | <i>MAP2K5</i>         | +                   | 2.80E-11 | 0.81                          | rs4776361             | 0.45                        | 5.50E-25  | 3.50E-14                      |
|            |     |             |                       | Subcutaneous fat | <i>MAP2K5</i>         | +                   | 7.49E-09 | 0.77                          | rs12902812            | 0.58                        | 1.08E-17  | 1.90E-04                      |
|            |     |             |                       | Blood            | <i>MAP2K5</i>         | +                   | 1.80E-20 | 0.54                          | rs4776361             | 0.45                        | 2.00E-46  | 1.30E-24                      |
|            |     |             |                       | Adipose          | <i>SMAD3</i>          | -                   | 9.50E-08 | 0.007                         | rs11071942            | 0.19                        | 4.90E-14  | 4.30E-09                      |
|            |     |             |                       | Blood            | <i>SMAD3</i>          | +                   | 1.10E-06 | 0.08                          | rs10152913            | 0.26                        | 3.40E-17  | 2.60E-12                      |
| rs12444979 | 16  | 19,841,101  | C                     | Omental fat      | <i>C16orf88</i>       | -                   | 2.54E-36 | 0.05                          | rs11647001            | 0.42                        | 4.93E-90  | 1.42E-30                      |
|            |     |             |                       | Adipose          | <i>C16orf88</i>       | -                   | 1.20E-19 | 0.94                          | rs2074037             | 0.21                        | 1.80E-41  | 1.50E-20                      |
|            |     |             |                       | Lymphocyte       | <i>C16orf88</i>       | -                   | 8.88E-13 | 0.69                          | rs3829539             | 0.16                        | 5.83E-33  | 1.35E-17                      |
|            |     |             |                       | Subcutaneous fat | <i>C16orf88</i>       | -                   | 1.17E-12 | 0.10                          | rs1016971             | 0.45                        | 8.82E-47  | 4.21E-19                      |
|            |     |             |                       | Blood            | <i>C16orf88</i>       | -                   | 1.00E-06 | 0.60                          | rs8045761             | 0.14                        | 1.60E-14  | 5.50E-09                      |
|            |     |             |                       | Subcutaneous fat | <i>GPRC5B</i>         | +                   | 1.08E-09 | 0.11                          | rs8045761             | 0.44                        | 3.48E-10  | 0.06                          |
|            |     |             |                       | Omental fat      | <i>IQCK</i>           | +                   | 1.71E-09 | 0.91                          | rs11865578            | 0.83                        | 3.17E-12  | 0.33                          |
|            |     |             |                       | Subcutaneous fat | <i>IQCK</i>           | +                   | 8.79E-07 | 1.00                          | rs12444979            | 1.00                        | 8.79E-07  | 1.00                          |
| rs7359397  | 16  | 28,793,160  | T                     | Blood            | <i>APOB48R</i>        | +                   | 8.00E-08 | 0.70                          | rs2411453             | 0.82                        | 4.70E-08  | 0.28                          |
|            |     |             |                       | Adipose          | <i>EIF3C</i>          | +                   | 5.40E-19 | 0.72                          | rs7189927             | 0.73                        | 1.20E-22  | 1.30E-04                      |
|            |     |             |                       | Blood            | <i>EIF3C</i>          | +                   | 7.60E-13 | 0.72                          | rs7189927             | 0.73                        | 3.90E-15  | 0.002                         |
|            |     |             |                       | Lymphocyte       | <i>EIF3S8</i>         | +                   | 9.88E-10 | NA                            | rs7189927             | 0.79                        | 1.50E-13  | NA                            |
|            |     |             |                       | Liver            | <i>NUPR1</i>          | +                   | 5.67E-14 | 0.68                          | rs3743963             | 0.49                        | 1.14E-25  | 9.17E-07                      |
|            |     |             |                       | Adipose          | <i>SH2B1</i>          | -                   | 1.50E-12 | 0.68                          | rs12928404            | 0.92                        | 9.20E-13  | 0.30                          |
|            |     |             |                       | Omental fat      | <i>SH2B1</i>          | -                   | 1.85E-06 | 1.00                          | rs7359397             | 1.00                        | 1.85E-06  | 1.00                          |
|            |     |             |                       | Lymphocyte       | <i>SPNS1</i>          | +                   | 9.66E-10 | 1.00                          | rs7500321             | 0.58                        | 7.63E-16  | 3.19E-04                      |
|            |     |             |                       | Subcutaneous fat | <i>SULT1A1</i>        | +                   | 1.48E-13 | 1.00                          | rs7359397             | 1.00                        | 1.48E-13  | 1.00                          |
|            |     |             |                       | Adipose          | <i>SULT1A1</i>        | +                   | 7.70E-15 | 0.83                          | rs151181              | 0.75                        | 1.80E-24  | 3.50E-10                      |

Supplementary Table 7

| BMI SNP   | Chr | Position   | BMI increasing allele | Tissue           | Gene           | Effect <sup>a</sup> | <i>P</i> -value | <i>P</i> <sub>adj</sub> <sup>b</sup> | Peak SNP <sup>c</sup> | <i>r</i> <sup>2</sup> <sup>d</sup> | <i>P</i> -value | <i>P</i> <sub>adj</sub> <sup>e</sup> |
|-----------|-----|------------|-----------------------|------------------|----------------|---------------------|-----------------|--------------------------------------|-----------------------|------------------------------------|-----------------|--------------------------------------|
|           |     |            |                       | Blood            | <i>SULT1A1</i> | +                   | 1.20E-06        | 0.002                                | rs2291937             | 0.00                               | 1.70E-10        | 2.10E-07                             |
|           |     |            |                       | Subcutaneous fat | <i>SULT1A2</i> | +                   | 4.11E-20        | 0.75                                 | rs1074631             | 0.80                               | 4.97E-22        | 0.30                                 |
|           |     |            |                       | Omental fat      | <i>SULT1A2</i> | +                   | 5.43E-11        | 0.93                                 | rs151181              | 0.70                               | 2.21E-14        | 0.06                                 |
|           |     |            |                       | Adipose          | <i>SULT1A2</i> | +                   | 5.60E-19        | 0.66                                 | rs151181              | 0.75                               | 2.70E-31        | 2.50E-12                             |
|           |     |            |                       | Blood            | <i>SULT1A2</i> | +                   | 5.20E-10        | 0.45                                 | rs12446550            | 0.86                               | 7.80E-12        | 0.004                                |
|           |     |            |                       | Adipose          | <i>SULT1A3</i> | +                   | 4.40E-16        | 0.47                                 | rs151181              | 0.75                               | 1.50E-24        | 3.70E-09                             |
|           |     |            |                       | Lymphocyte       | <i>TUFM</i>    | +                   | 1.19E-07        | 0.82                                 | rs12928404            | 0.98                               | 1.83E-08        | 0.66                                 |
|           |     |            |                       | Blood            | <i>TUFM</i>    | +                   | 9.10E-69        | 0.10                                 | rs8049439             | 0.96                               | 9.10E-71        | 0.003                                |
| rs3810291 | 19  | 52,260,843 | A                     | Lymphocyte       | <i>TMEM160</i> | -                   | 3.09E-05        | 0.49                                 | rs1862499             | 0.14                               | 3.10E-06        | 0.11                                 |
|           |     |            |                       | Blood            | <i>ZC3H4</i>   | -                   | 2.60E-16        | 0.24                                 | rs8101091             | 0.66                               | 1.80E-20        | 1.60E-05                             |
|           |     |            |                       | Adipose          | <i>ZC3H4</i>   | -                   | 9.00E-09        | 1.00                                 | rs3810291             | 1.00                               | 9.00E-09        | 1.00                                 |

\* we distinguished 'adipose' tissue from a general population and 'omental fat' and subcutaneous fat' from patients who underwent bariatric surgery (see **Methods**)

<sup>a</sup> Direction of effect for the BMI increasing allele

<sup>b</sup> *P*-value for the BMI SNP after conditioning on the most significant SNP for the gene transcript.

<sup>c</sup> Most significant SNP associated with the gene transcript

<sup>d</sup> Correlation between the BMI SNP and the peak SNP

<sup>e</sup> *P*-value for the peak SNP after conditioning on the BMI SNP

Supplementary Table 8

**Supplementary Table 8 - Estimated number of BMI loci for each of the effect sizes observed in stage 2 for the SNPs that reached a genome-wide significance of  $5 \times 10^{-8}$  in the joint analysis of stage 1 and stage 2, given the power to detect the association in the joint analysis of stage 1 and stage 2.**

|                                                | SNP        | MAF*  | Mean Difference | Standardized effect size | Power (%) | Estimated number of loci |
|------------------------------------------------|------------|-------|-----------------|--------------------------|-----------|--------------------------|
| 1                                              | rs29941    | 0.329 | -0.013          | 7.35E-05                 | 1%        | 50.2                     |
| 2                                              | rs4929949  | 0.486 | -0.013          | 8.71E-05                 | 2%        | 43.3                     |
| 3                                              | rs206936   | 0.206 | 0.017           | 9.11E-05                 | 3%        | 41.4                     |
| 4                                              | rs4836133  | 0.49  | 0.016           | 1.20E-04                 | 8%        | 27.8                     |
| 5                                              | rs11847697 | 0.039 | 0.042           | 1.30E-04                 | 11%       | 23.2                     |
| 6                                              | rs1555543  | 0.415 | -0.017          | 1.40E-04                 | 14%       | 18.9                     |
| 7                                              | rs13078807 | 0.193 | 0.022           | 1.44E-04                 | 15%       | 17.3                     |
| 8                                              | rs4771122  | 0.242 | 0.021           | 1.56E-04                 | 19%       | 12.3                     |
| 9                                              | rs3817334  | 0.398 | 0.018           | 1.57E-04                 | 20%       | 12                       |
| 10                                             | rs2890652  | 0.2   | 0.024           | 1.86E-04                 | 32%       | 4.3                      |
| 11                                             | rs1514175  | 0.434 | 0.02            | 1.95E-04                 | 36%       | 3.8                      |
| 12                                             | rs3810291  | 0.343 | -0.022          | 2.16E-04                 | 45%       | 2.9                      |
| 13                                             | rs2112347  | 0.381 | -0.022          | 2.28E-04                 | 51%       | 2.3                      |
| 14                                             | rs887912   | 0.275 | 0.024           | 2.30E-04                 | 51%       | 2.3                      |
| 15                                             | rs10968576 | 0.331 | 0.023           | 2.34E-04                 | 53%       | 2.2                      |
| 16                                             | rs13107325 | 0.067 | 0.048           | 2.82E-04                 | 71%       | 1.6                      |
| 17                                             | rs10150332 | 0.223 | 0.029           | 2.95E-04                 | 75%       | 1.5                      |
| 18                                             | rs987237   | 0.185 | 0.032           | 3.10E-04                 | 79%       | 1.4                      |
| 19                                             | rs9816226  | 0.183 | -0.034          | 3.36E-04                 | 85%       | 1.3                      |
| 20                                             | rs2241423  | 0.208 | -0.033          | 3.53E-04                 | 88%       | 1.3                      |
| 21                                             | rs7138803  | 0.382 | 0.028           | 3.75E-04                 | 91%       | 1.2                      |
| 22                                             | rs12444979 | 0.135 | -0.042          | 4.04E-04                 | 94%       | 1.1                      |
| 23                                             | rs2287019  | 0.204 | -0.037          | 4.54E-04                 | 97%       | 1.1                      |
| 24                                             | rs2815752  | 0.378 | -0.032          | 4.81E-04                 | 98%       | 1.1                      |
| 25                                             | rs7359397  | 0.4   | 0.035           | 5.81E-04                 | 100%      | 1                        |
| 26                                             | rs713586   | 0.462 | 0.036           | 6.41E-04                 | 100%      | 1                        |
| 27                                             | rs10767664 | 0.208 | -0.048          | 7.50E-04                 | 100%      | 1                        |
| 28                                             | rs543874   | 0.188 | 0.052           | 8.19E-04                 | 100%      | 1                        |
| 29                                             | rs10938397 | 0.442 | 0.043           | 9.12E-04                 | 100%      | 1                        |
| 30                                             | rs571312   | 0.226 | 0.057           | 1.14E-03                 | 100%      | 1                        |
| 31                                             | rs2867125  | 0.172 | -0.078          | 1.75E-03                 | 100%      | 1                        |
| 32                                             | rs1558902  | 0.419 | 0.092           | 4.08E-03                 | 100%      | 1                        |
| <b>Estimated number of total loci</b>          |            |       |                 |                          |           | 283.5<br>(132.3, 510.0)* |
| <b>Total phenotypic variance explained (%)</b> |            |       |                 |                          |           | 4.50%<br>(3.1, 6.8)*     |

\* Numbers in parenthesis are for a 95% confidence interval by the percentile-based approach

## 1.2. SUPPLEMENTARY FIGURES

|                                                                                                                                                                    |              |
|--------------------------------------------------------------------------------------------------------------------------------------------------------------------|--------------|
| <b>Supplementary Figure 1</b> Study design.                                                                                                                        | <b>P. 15</b> |
| <b>Supplementary Figure 2</b> Regional plots of the 32 confirmed BMI loci with missense and CNV variants.                                                          | <b>P. 17</b> |
| <b>Supplementary Figure 3</b> Quantile-quantile plot of SNPs at stage 1 GIANT meta-analysis.                                                                       | <b>p. 24</b> |
| <b>Supplementary Figure 4</b> Relationship between the predicted BMI, based on the 32 confirmed BMI loci combined, and the actual BMI in the ARIC Study (N=8,120). | <b>p. 26</b> |

**Supplementary Figure 1 Study design.** Stage 1 - Meta analysis of genome-wide association data was performed in stage 1 across 46 studies of white European Ancestry. A total of 42 SNPs representing the best associating ( $P < 5.10^{-6}$ ) loci (shown) were taken forward for replication. Nineteen of these SNPs (loci in bold) reached already genome-wide significance at stage 1. Stage 2 – The 42 SNPs were genotyped in 16 de novo replication studies and extracted from 18 *in silico* replication studies, all adults of European ancestry and were tested for association with BMI. In a joint analyses of stage 1 and stage 2 data, 32 SNPs (loci in bold) reached genome-wide significance ( $P < 5 \times 10^{-8}$ ). Follow-up analyses – The 32 confirmed loci were taken forward for additional analyses.

## STAGE 1

### GWA meta-analyses of BMI

Meta-analysis of GWA analyses of 2.8M imputed and genotyped SNPs with BMI in 123,865 adults from 46 studies.

42 loci ( $P < 5 \times 10^{-6}$ )  
taken forward

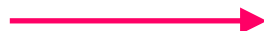

## STAGE 2

### Follow-up of the most significant loci in additional samples

Association analyses of 42 SNPs with BMI in 125,931 adults.

*de novo* replication  
(N = 79,561 from 16 studies)

*In silico* replication  
(N = 46,370 from 18 studies)

32 loci ( $P < 5 \times 10^{-8}$ )  
were confirmed

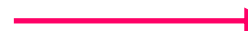

**Stage 1 + stage 2 meta-analyses of 42 SNPs**

( $n_{\max} = 249,796$ ).

## Follow-up analyses

### Additional analyses of 32 confirmed BMI loci

- Association with risk of extreme obesity
- Association with BMI-related traits
- eQTL analyses
- Pathway analyses
- CNV and functional variant analyses
- Explained variance and polygenes
- 2nd signal analyses
- Dominant, recessive analyses
- Gene-by-gene and Gene-by-sex

|                   |                                                                          |                                                                                |
|-------------------|--------------------------------------------------------------------------|--------------------------------------------------------------------------------|
| Previous BMI loci | <b>FTO</b><br><b>MC4R</b><br><b>BDNF</b><br><b>SH2B1</b><br><b>MTCH2</b> | <b>TMEM18</b><br><b>GNPDA2</b><br><b>NEGR1</b><br><b>ETV5</b><br><b>KCTD15</b> |
|-------------------|--------------------------------------------------------------------------|--------------------------------------------------------------------------------|

|                              |                               |                               |
|------------------------------|-------------------------------|-------------------------------|
| Previous weight & waist loci | <b>SEC16B</b><br><b>FAIM2</b> | <b>TFAP2B</b><br><b>NRXN3</b> |
|------------------------------|-------------------------------|-------------------------------|

|                 |                 |
|-----------------|-----------------|
| <b>RBJ</b>      | <b>GPRC5B</b>   |
| <b>MAP2K5</b>   | <b>QPCTL</b>    |
| <b>TNNI3K</b>   | <b>SLC39A8</b>  |
| <b>FLJ35779</b> | <b>LRRN6C</b>   |
| <b>TMEM160</b>  | <b>FANCL</b>    |
| <b>CADM2</b>    | <b>PRKD1</b>    |
| <b>LRP1B</b>    | <b>PTBP2</b>    |
| <b>MTIF3</b>    | <b>ZNF608</b>   |
| <b>RPL27A</b>   | <b>NUDT3</b>    |
| <b>HNF4G</b>    | <b>ADCY9</b>    |
| <b>LMX1B</b>    | <b>CBX1</b>     |
| <b>HTR1A</b>    | <b>KIAA1505</b> |
| <b>C9orf4</b>   | <b>REG3A</b>    |
| <b>SCG3</b>     | <b>RASA2</b>    |

|                   |                                                                          |                                                                                |
|-------------------|--------------------------------------------------------------------------|--------------------------------------------------------------------------------|
| Previous BMI loci | <b>FTO</b><br><b>MC4R</b><br><b>BDNF</b><br><b>SH2B1</b><br><b>MTCH2</b> | <b>TMEM18</b><br><b>GNPDA2</b><br><b>NEGR1</b><br><b>ETV5</b><br><b>KCTD15</b> |
|-------------------|--------------------------------------------------------------------------|--------------------------------------------------------------------------------|

|                              |                               |                               |
|------------------------------|-------------------------------|-------------------------------|
| Previous weight & waist loci | <b>SEC16B</b><br><b>FAIM2</b> | <b>TFAP2B</b><br><b>NRXN3</b> |
|------------------------------|-------------------------------|-------------------------------|

|                 |                 |                |
|-----------------|-----------------|----------------|
| 18 New BMI loci | <b>RBJ</b>      | <b>GPRC5B</b>  |
|                 | <b>MAP2K5</b>   | <b>QPCTL</b>   |
|                 | <b>TNNI3K</b>   | <b>SLC39A8</b> |
|                 | <b>FLJ35779</b> | <b>LRRN6C</b>  |
|                 | <b>TMEM160</b>  | <b>FANCL</b>   |
|                 | <b>CADM2</b>    | <b>PRKD1</b>   |
|                 | <b>LRP1B</b>    | <b>PTBP2</b>   |
|                 | <b>MTIF3</b>    | <b>ZNF608</b>  |
|                 | <b>RPL27A</b>   | <b>NUDT3</b>   |



**Supplementary Figure 2 Regional plots of the 32 confirmed BMI loci with missense and CNV variants.** SNPs are plotted by position on chromosome against association with BMI ( $-\log_{10} P$ -value). The SNP name shown on the plot was the most significant SNP after stage 1 meta-analysis. Estimated recombination rates (from HapMap) are plotted in cyan to reflect the local LD structure. The SNPs surrounding the most significant SNP are color-coded to reflect their LD with this SNP (taken from pairwise  $r^2$  values from the HapMap CEU database, [www.hapmap.org](http://www.hapmap.org)). Genes, position of exons, and direction of transcription from UCSC genome browser ([genome.ucsc.edu](http://genome.ucsc.edu)) are noted. Hash-marks represent SNP positions available in the meta-analysis. Plots were generated using LocusZoom (<http://csg.sph.umich.edu/locuszoom>).

# Supplementary Figure 2

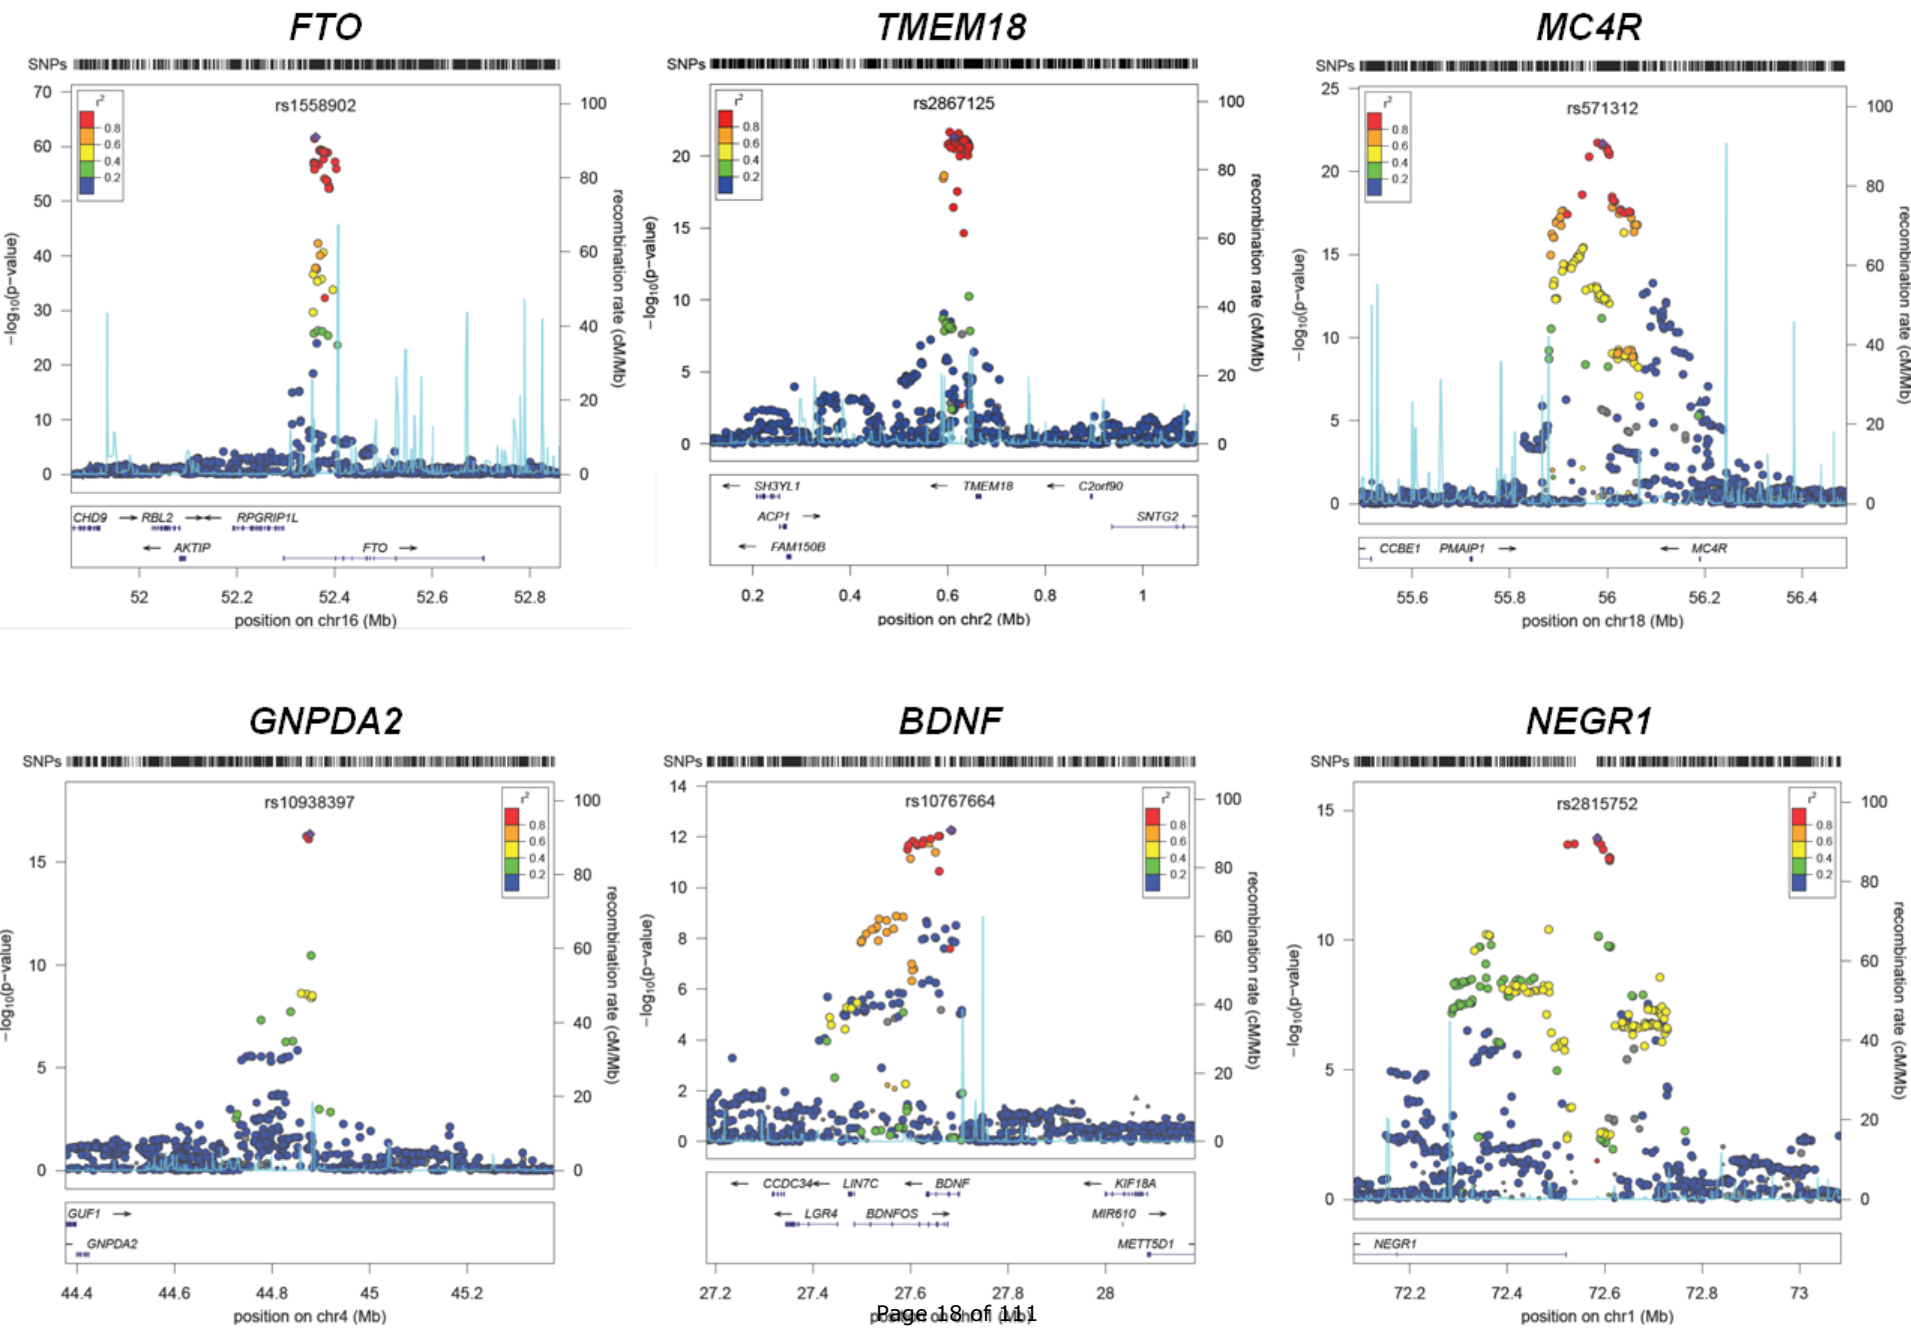

Supplementary Figure 2 (continued)

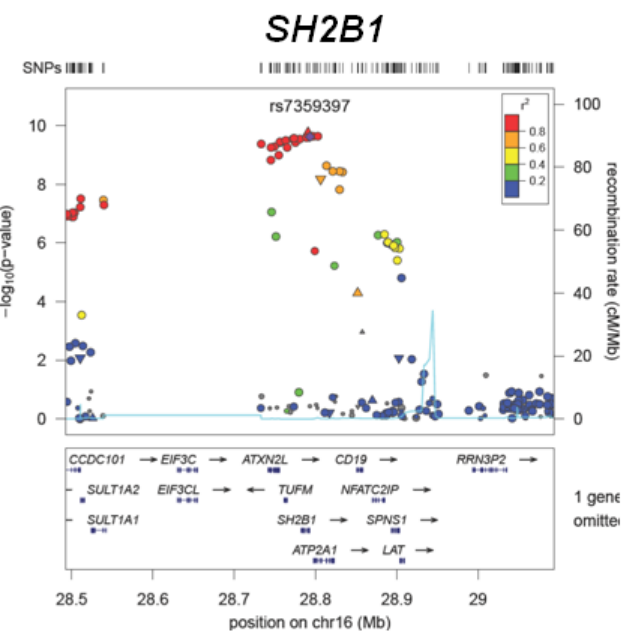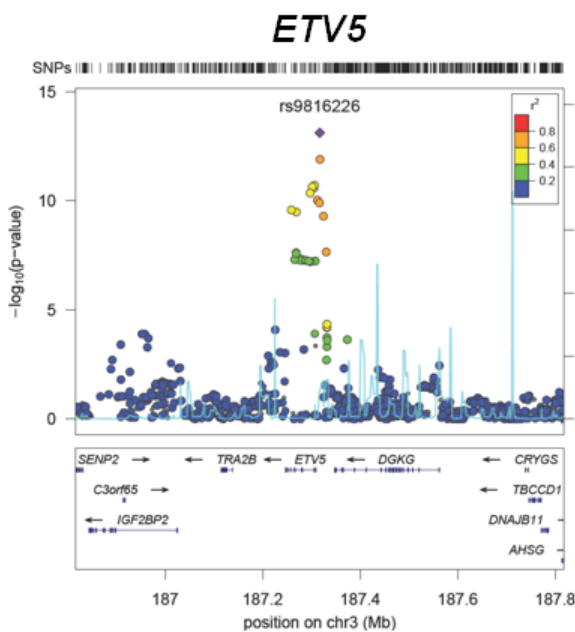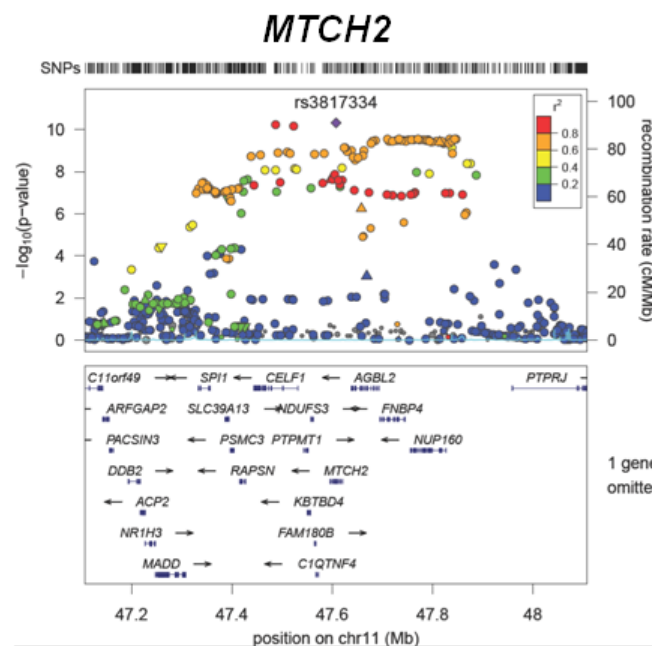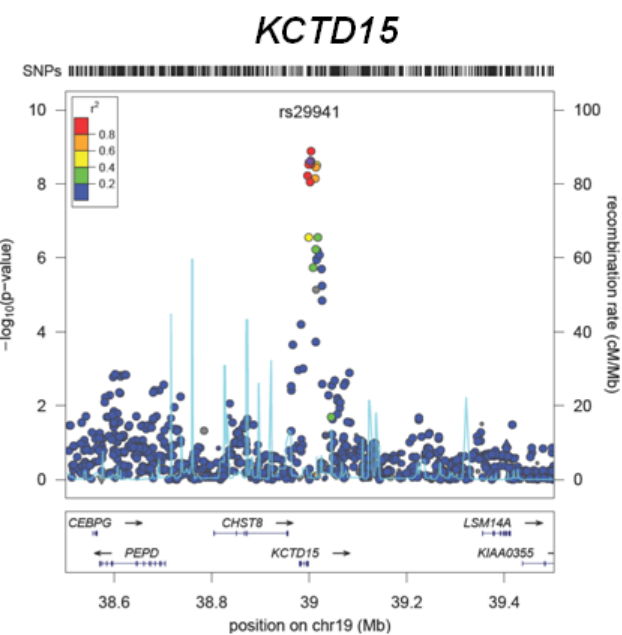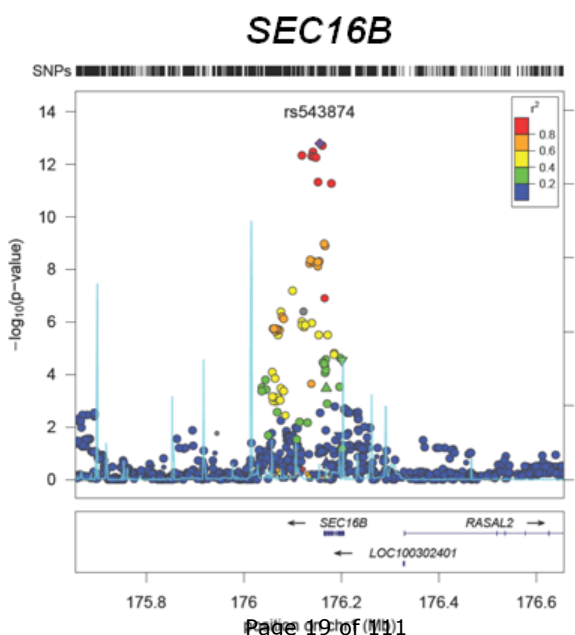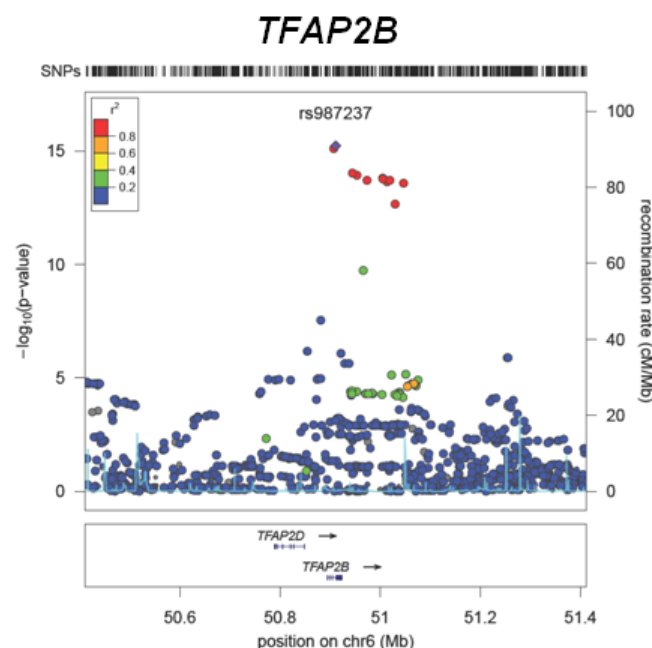

**FAIM2**

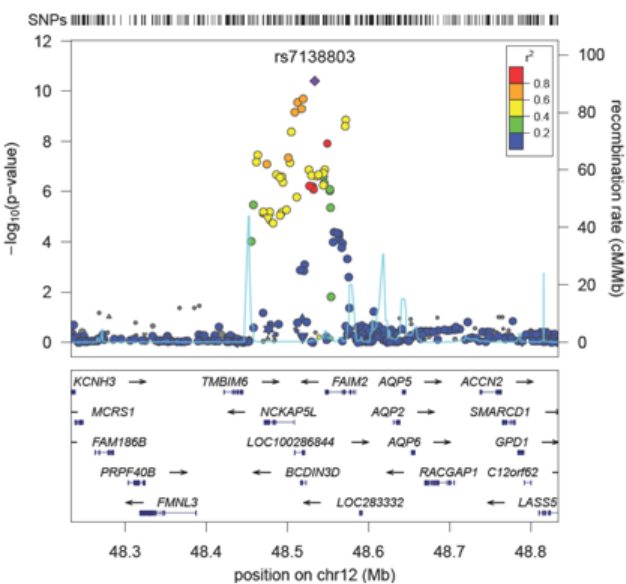

**NRXN3**

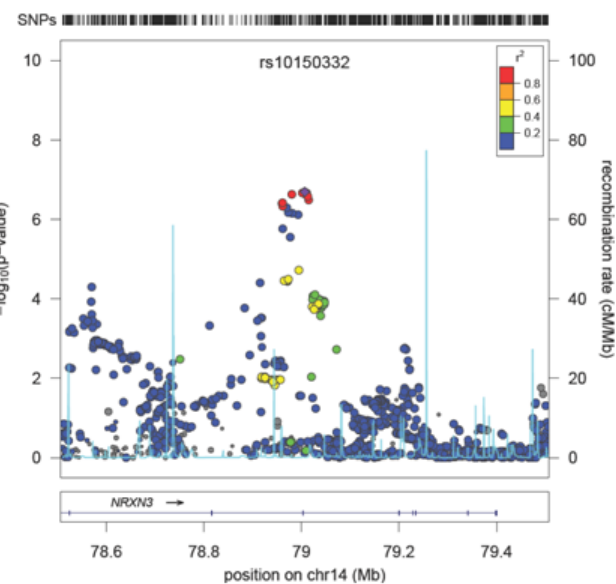

**GPRC5B**

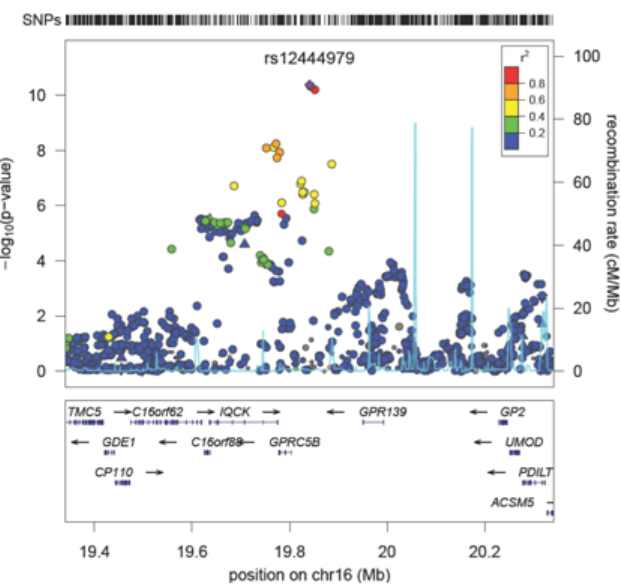

**RBJ; POMC**

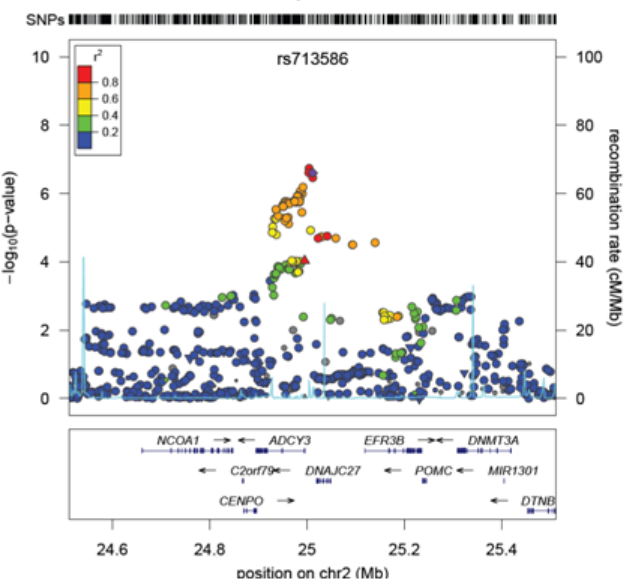

**MAP2K5**

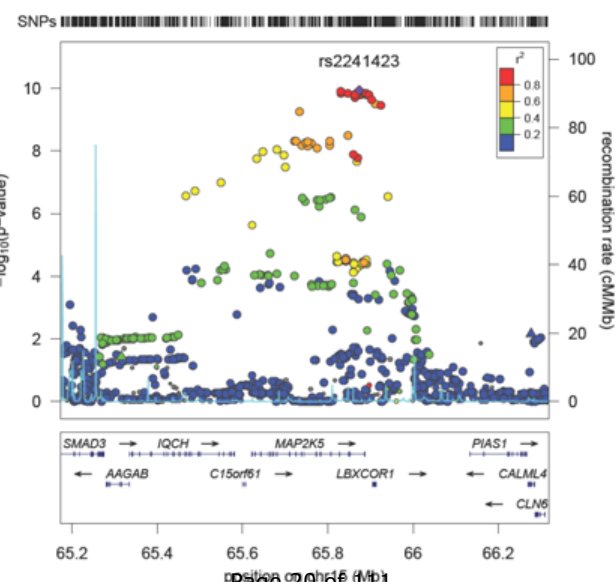

**QPCTL; GIPR**

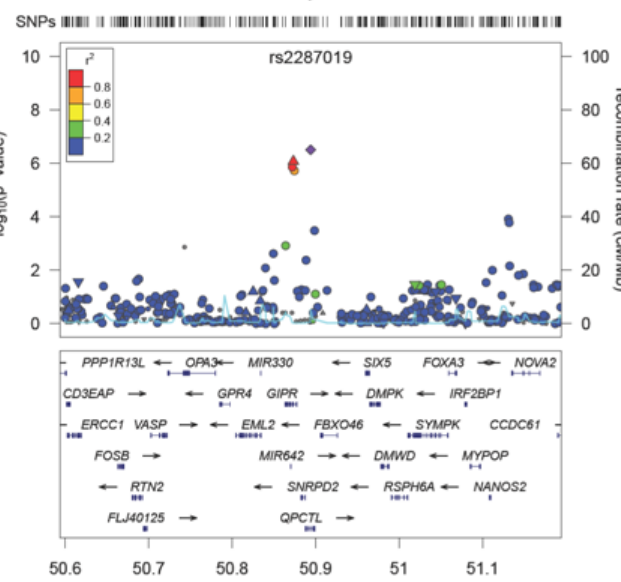

**FANCL**

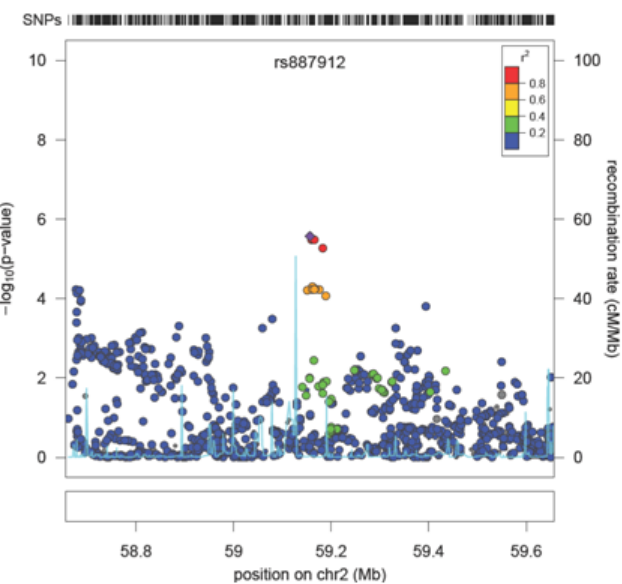

**TNNIK3**

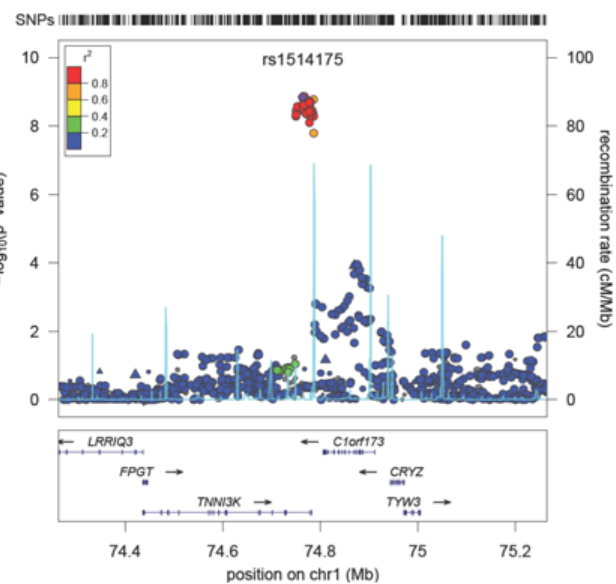

**LRRN6C**

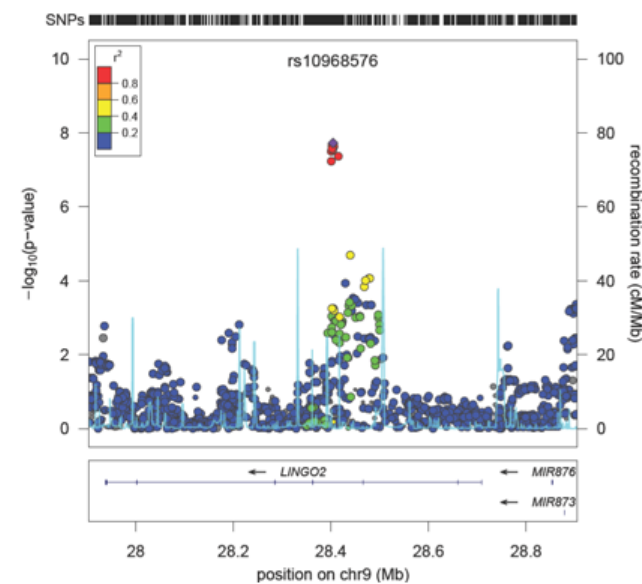

**FLJ35779**

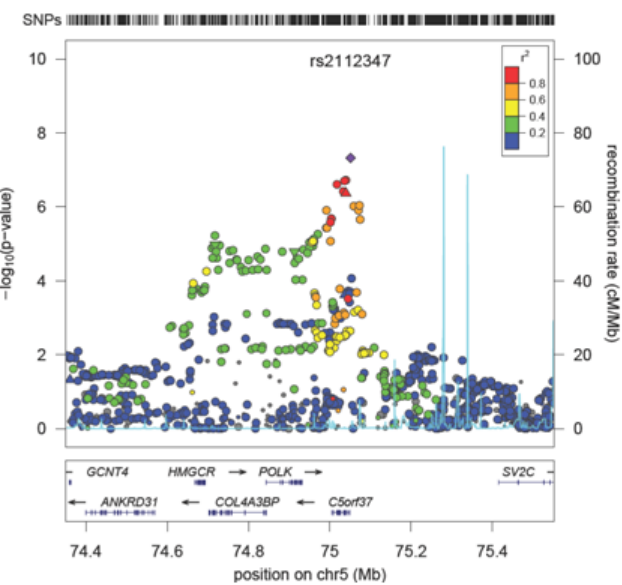

**SLC39A8**

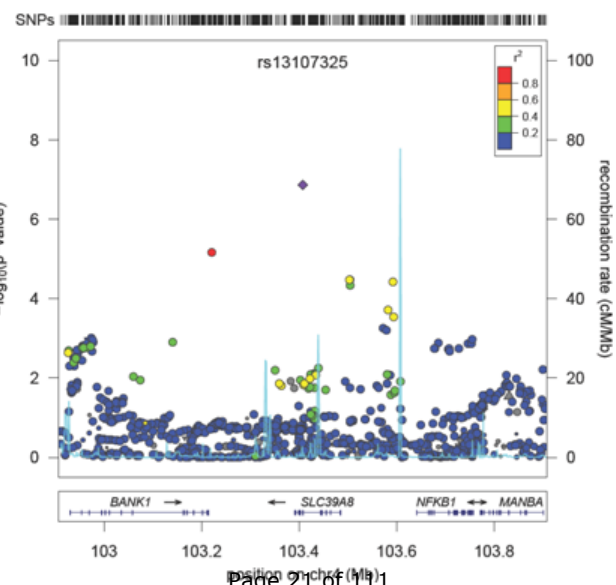

**TMEM160**

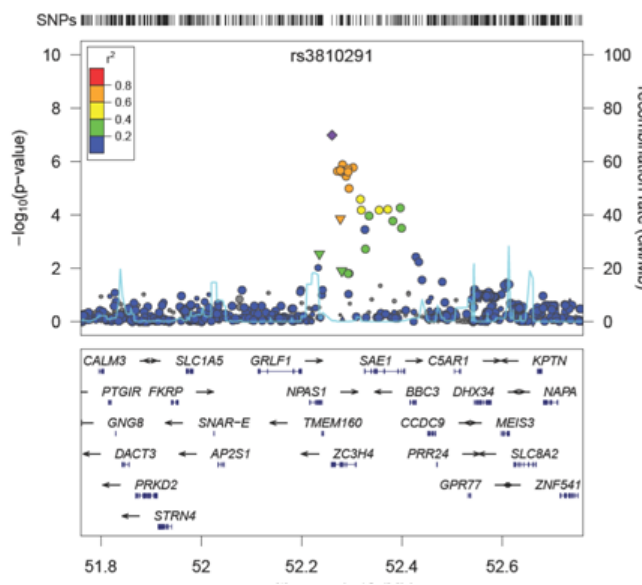



# Supplementary Figure 2 (continued)

## CADM2

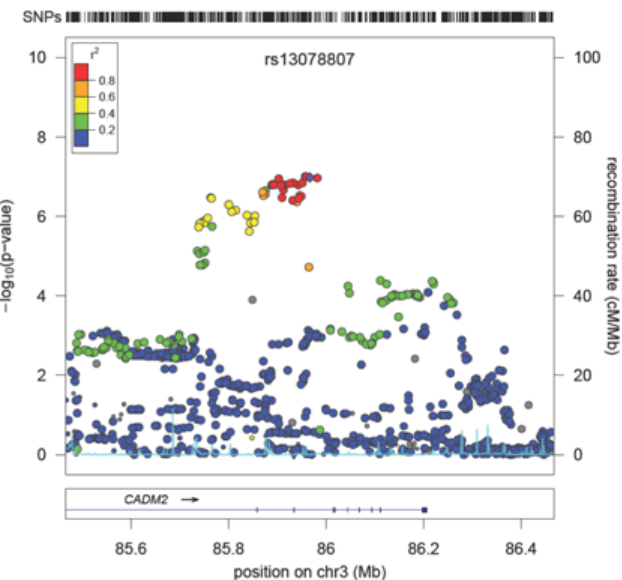

## LRP1B

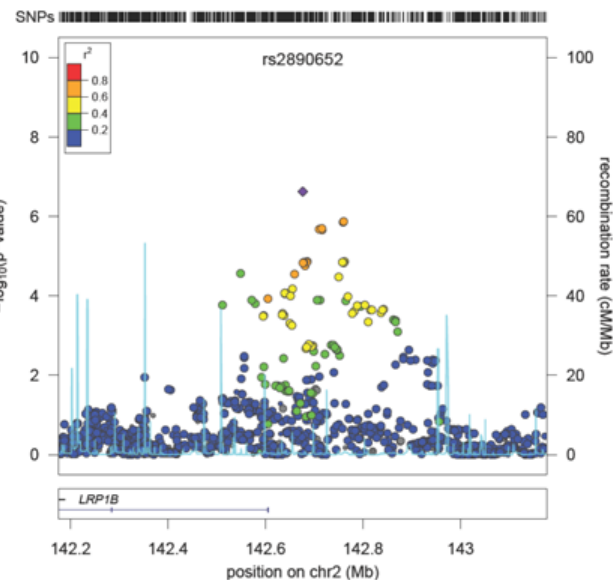

## PRKD1

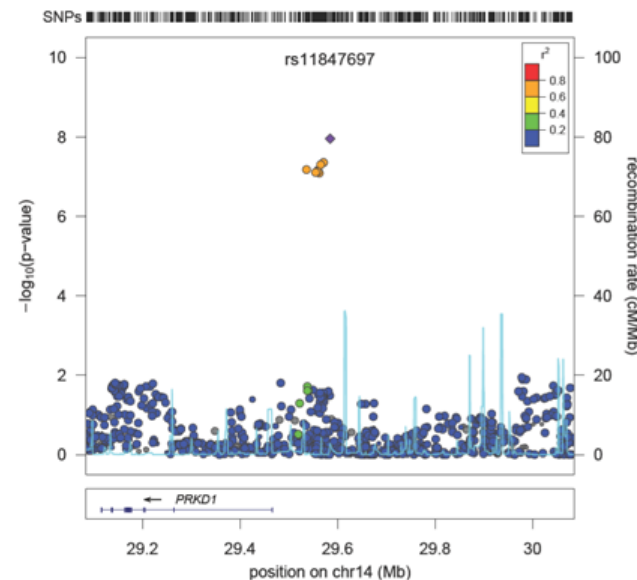

## MTIF3

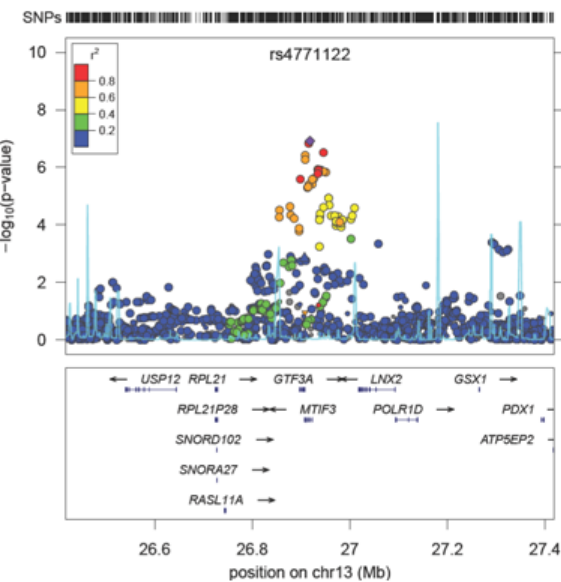

## ZNF608

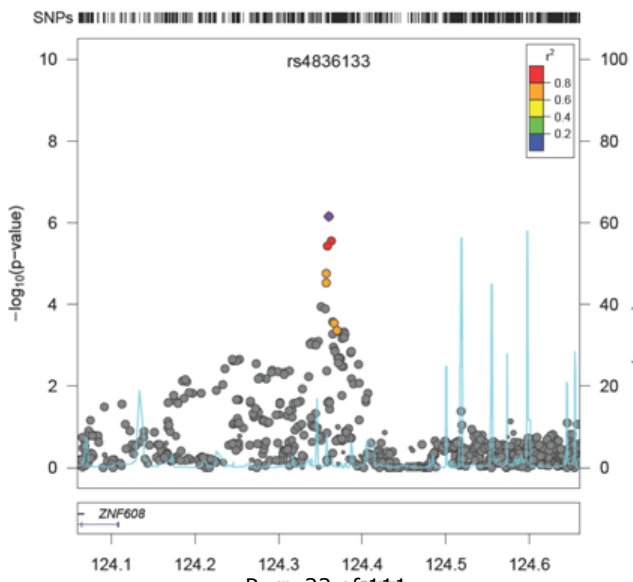

## PTBP2

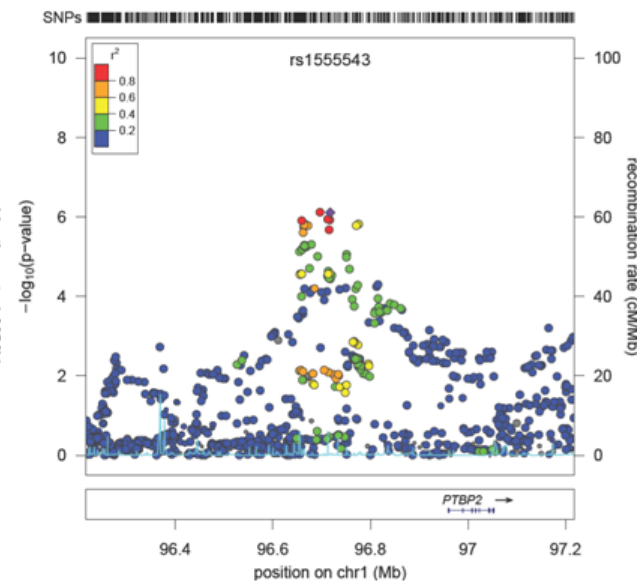

*RPL27A*

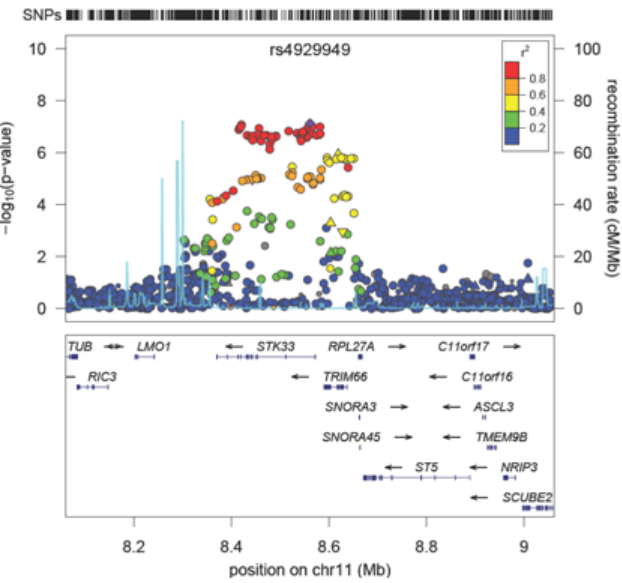

*NUDT3*

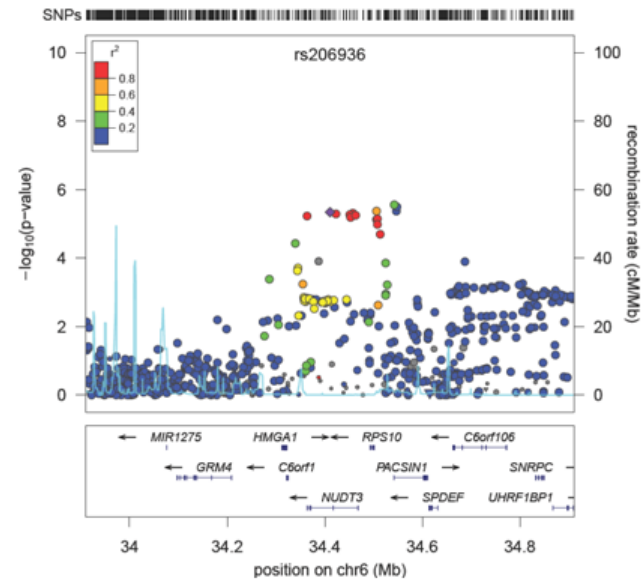

**Supplementary Figure 3** Quantile-quantile plot of SNPs at stage 1 GIANT meta-analysis (black) and after removing any SNPs within 1Mb of the 10 previously reported genome-wide significant hits for BMI (blue), after additionally excluding the four loci for waist/weight (green) and after excluding all 32 confirmed loci (red).



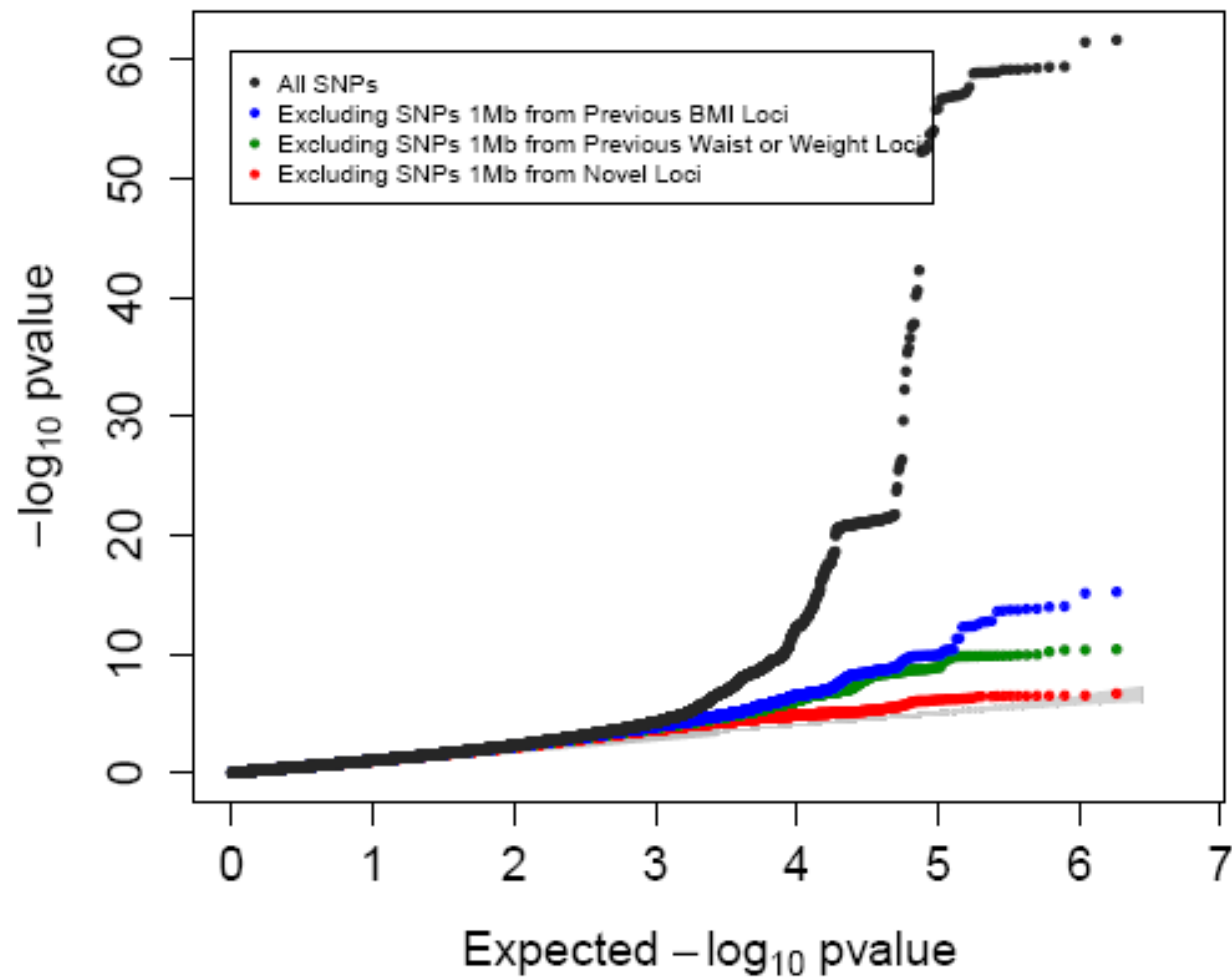

**Supplementary Figure 4** Relationship between the predicted BMI, based on the 32 confirmed BMI loci combined, and the actual BMI in the ARIC Study (N=8,120). Panel (a) shows the comparison of the predicted BMI (grey), with the actual BMI (green) and quartile ranges (orange) in sets of 500 individuals, suggesting good average predictions. Panel (b) shows the comparison of the individual predicted and observed BMI values, suggesting poor individual predictions.

**a.**

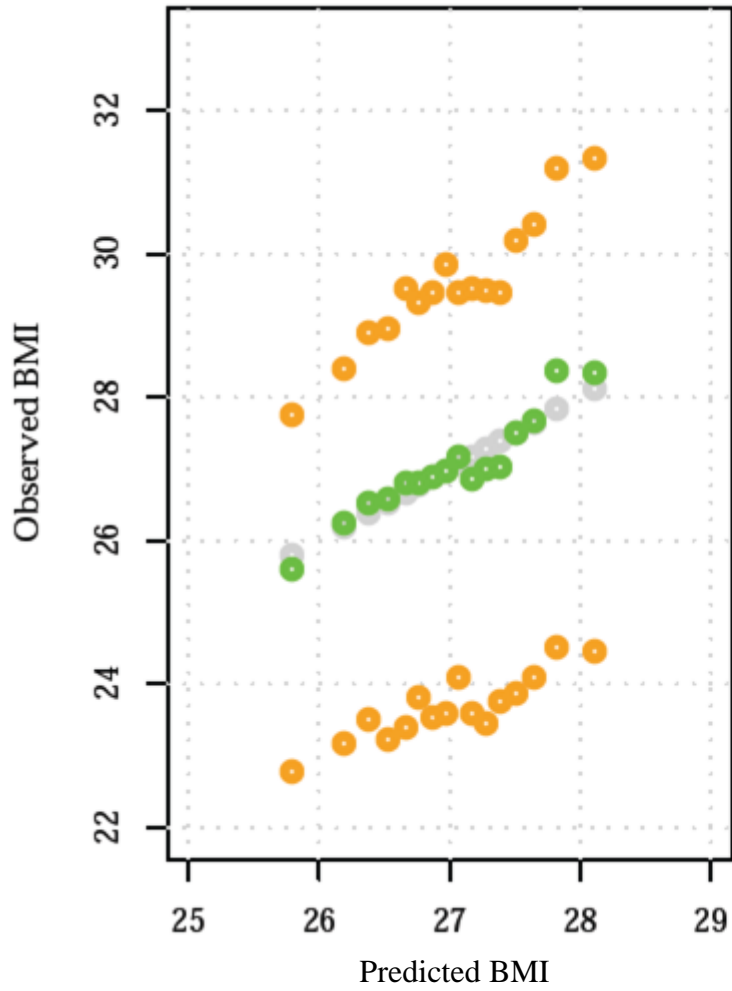

**b.**

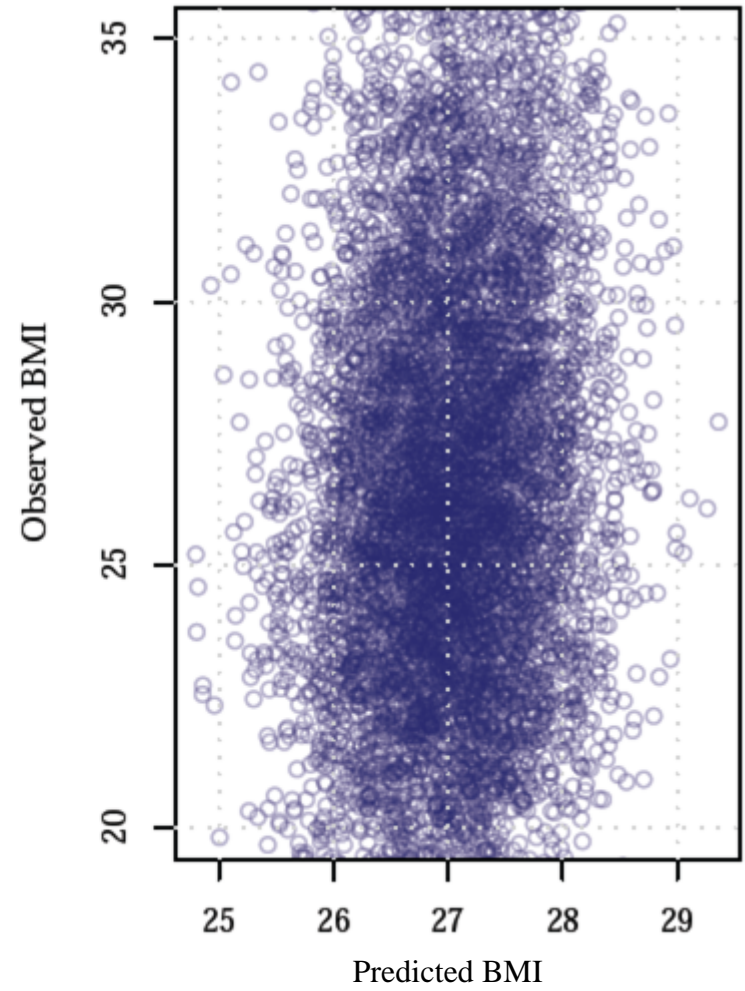

|                                        |              |
|----------------------------------------|--------------|
| <b>2. SUPPLEMENTARY NOTE</b>           | <b>P. 28</b> |
| 2.1. Description of secondary analyses | p. 29        |
| 2.2. Supplementary note – tables       | p. 38        |
| 2.3. Supplementary note – figure       | p. 95        |
| 2.4. Author contributions              | p. 97        |
| 2.5. Acknowledgements                  | p. 101       |
| 2.6. Competing interests statement     | p. 111       |

## 2. SUPPLEMENTARY NOTE

### 2.1. DESCRIPTION OF SECONDARY ANALYSES

#### 2.1.1. Predictive value and cumulative effects of confirmed loci

To estimate the cumulative effect of the 32 confirmed BMI loci combined, we calculated a genetic risk score in the Atherosclerosis Risk in Communities (ARIC) study (N = 8,120), one of our largest stage 1 samples. The genetic risk score was calculated by summing the number of risk alleles (0,1,2) carried by an individual or the number of “best guess” risk alleles from imputed data at each of the 32 confirmed SNPs, weighted by the relative effect sizes of that SNP estimated from stage 2 data. The genetic risk score was rounded to the nearest integer to represent the individual’s risk allele score (range 16-44). The mean BMI in each genetic risk score category was calculated.

To assess the predictive ability of the SNPs for obesity (BMI  $\geq$  30 kg/m<sup>2</sup>), the area under the ROC curve was obtained from the c-statistic of the logistic regression model in which the 32 confirmed SNPs, represented by the weighted genetic risk score (see above), were predictors coded in an additive genetic model with obesity as the outcome, adjusted for age, age<sup>2</sup>, and sex. We estimated the AUC for a model with and without inclusion of the 32 SNPs. The *P*-values for these analyses were obtained from the corresponding models.

Furthermore, we assessed the ability of the 32 confirmed SNPs to predict BMI in the ARIC study. Predicted BMI for each individual was calculated based on mean BMI in the study population plus the individual risk allele count multiplied by the effect on BMI per risk allele, summed over all 32 confirmed BMI loci. We subsequently compared the predicted BMI with the observed BMI using the average values of sets of 500 individuals as well as using the individual values.

#### 2.1.2. Association analyses with obese and overweight

Association between the 32 confirmed BMI variants and overweight (defined as BMI  $\geq$  25 kg/m<sup>2</sup>) or obese status (BMI  $\geq$  30 kg/m<sup>2</sup>) was assessed in stage 2 samples using logistic regression analysis, adjusting for age and age<sup>2</sup>. Tests assumed an additive genetic model and were stratified by sex and case status where appropriate. Summary statistics (betas and standard errors) were subsequently meta-analysed using the inverse variance method in METAL, and the meta-analysis results were converted back to ORs and 95% CIs.

#### 2.1.3. Effects in specific populations – children and extreme obesity

We tested for association between the 32 confirmed SNPs with BMI in children and adolescents in four population-based studies (total N=8,540, **Supplementary Note – Tables 7-9**). In three of these studies (*de novo*), the 32 SNPs were directly genotyped,

and in one study (*in silico*), they were imputed. Before analyses, BMI was standardized by age and sex in each study and only SNPs that met the QC criteria described for stage 2 samples were included (**Supplementary Note – Tables 7-9**). Associations between SNPs and BMI assumed an additive genetic model and summary statistics were subsequently meta-analyzed using the inverse variance method in METAL.

Furthermore, association between the 32 SNPs and extreme or early onset obesity were tested in seven case-control studies (three with *de novo* genotyping, four with *in silico* data) of extremely obese adults (2 studies; N=1,686 cases) and extremely obese children or adolescents (5 studies; total N=5,136 cases) (**Supplementary Note – Tables 7-9**). The seven studies underwent QC as described before, and two meta-analyses were performed: [1] adults and children/adolescents combined, and [2] children/adolescents only, using the inverse variance method in METAL.

To ensure consistency of results, the meta-analyses described above were repeated using a weighted Z-score method. The *P*-values obtained by both methods were highly correlated ( $r > 0.99$ ), and we present the results of the inverse variance meta-analysis.

In addition, we tested whether BMI-increasing alleles of the 32 confirmed SNPs were overtransmitted to extremely obese offspring using a transmission disequilibrium test (TDT) in two family-based studies (one *in silico* and one *de novo*). Summary statistics were meta-analysed using a weighted Z-score method weighed by the two-thirds of the sample size of each study (i.e offspring and one parent per trio).

#### **2.1.4. Association analyses with BMI-related traits**

Association between the 32 confirmed BMI SNPs and height and weight were extracted from stage 2 replication samples. The analyses were performed in a manner identical to BMI, except for height where age-adjusted Z-scores, calculated for men and women separately, were used.

Association between the 32 confirmed BMI SNPs and related traits were extracted from previously reported GWA meta-analyses for type 2 diabetes (DIAGRAM Consortium<sup>1</sup>), lipid levels (the Global Lipids Genetics Consortium<sup>2</sup>), glycemic traits (MAGIC<sup>3,4</sup>).

#### **2.1.5. Enrichment analysis of BMI associations in biological pathways**

To discover potentially new pathways associated with BMI, and to test whether the 32 confirmed BMI SNPs cluster near genes that constitute specific biological connections, we tested whether predefined biological processes or molecular functions that contain at least one gene within 300 kb of the 32 confirmed BMI SNPs were enriched for multiple modest BMI associations (**Supplementary Table 5**). Therefore, we applied an adaptation of the gene set enrichment analysis (GSEA) framework named MAGENTA

## Supplementary Note

(Meta-Analysis Gene-set Enrichment of variaNT Associations)<sup>5</sup> to the BMI meta-analysis SNP data. First, we calculated a corrected gene association P-value for each gene in the genome. The gene P-value is based on the most significant SNP BMI association P-value of all SNPs within 110 kb upstream and 40 kb downstream to each gene's most extreme transcript start and end sites, respectively, adjusted for potential confounders such as gene size, number of SNPs per gene and linkage-related properties. Subsequently, we grouped genes into pathways using annotations from the KEGG, PANTHER, Gene Ontology (GO), and Ingenuity databases (from the Molecular Signatures Database, MsigDB, <http://www.broad.mit.edu/gsea/msigdb/collections.jsp>). The PANTHER molecular function and biological process gene-sets were downloaded from the PANTHER website (<http://www.pantherdb.org/>). Finally, for each pathway, we evaluated potential enrichment of highly ranked gene scores by comparing the fraction of genes within each gene set whose corrected P-value is more significant than the 75th percentile of all gene P-values to that of 10,000 randomly sampled gene sets of identical size from the genome. The 75th percentile cut-off was chosen based on our polygenic model analysis that suggests there may be many small genetic effects for BMI (**Fig. 4a**). We adjusted for genes in a given gene set that are physically adjacent in the genome by keeping only one of each subset of genes assigned the same best SNP (the gene with the most significant gene score was retained).

### **2.1.6. Functional variants and candidate genes within the 32 confirmed loci**

To identify SNPs in each of the 32 loci that may be causal, we selected all lead SNPs and identified any SNP in  $r^2 > 0.7$  (from 1000 Genomes CEU or HapMap CEU) with either the lead SNP or a HapMap  $r^2=1$  proxy, to account for lead SNPs that may have been poorly genotyped in the 1000 Genomes. From this list of SNPs and proxies from 1000 Genomes or HapMap, we identified SNPs that were likely non-synonymous, nonsense or occurred within 5bp of the exon/intron boundary by comparing the SNP alleles and position to the transcription start sites and initiation codons of known genes from UCSC.

To identify candidate genes in the regions of association, we identified any gene within 500kb of the 32 confirmed BMI SNPs and performed an automated search of PubMed (<http://www.pubmed.com>) using search terms "BMI" or "obesity" and each gene name. We also scanned the OMIM (<http://www.ncbi.nlm.nih.gov/omim>) entry for each gene to identify the presence of the search terms. We used a bioinformatics tool, Snipper (<http://csg.sph.umich.edu/boehnke/snipper>), to perform the search. To highlight results that point towards functional candidacy of genes in the region, we excluded any references to GWAS or other genetic association studies. Results are summarized in the **Supplementary Note - Table 12**.

### 2.1.7. Copy Number Variant (CNV) analyses

We previously typed 1,350 CNVs in the HapMap analysis panels, of which 360 were common (MAF > 5%) in individuals of European ancestry (HapMap CEU), and explained more than 80% of the copy-number differences between any two individuals. Of these common CNVs, 323 appeared to be biallelic and 258 of these were in strong LD with HapMap SNPs that are close to, but do not overlap, with the CNVs<sup>6</sup>. We first identified the SNPs in our meta-analysis that best captured each of these 258 common biallelic CNVs based on the LD reported in the HapMap CEU population. Next, we evaluated the significance of their association with BMI in our meta-analysis.

### 2.1.8. eQTL analyses

We examined the *cis*-associations (defined as genes within 1 Mb) between each of the 32 confirmed BMI SNPs and expression of nearby genes in adipose tissue<sup>7,8</sup>, whole blood<sup>7</sup>, lymphocytes<sup>9, 8</sup>, and brain (cortical tissue)<sup>10</sup>.

**Adipose tissue and whole blood** - The eQTL analyses using in adipose tissue and in whole blood have been described in detail previously (GEO database: GSE7965 and GPL3991)<sup>7,11,12</sup>. In brief, 603 individuals from Iceland with adipose tissue samples and 745 with blood samples were genotyped with the Illumina 317K or 370K chip. RNA samples were hybridized to a single custom-made human array containing 23,720 unique oligonucleotide probes. *Cis*-association was tested between SNPs and the mean logarithm ( $\log_{10}$ ) expression ratio (MLR) adjusted for age, sex, and age x sex, as well as differential cell count in the blood analyses, assuming an additive genetic model and accounting for familial relatedness. Only *cis*-associations with a *P*-value <  $1 \times 10^{-5}$  corresponding to 5% false discovery rate (FDR) are presented.

**Lymphocytes** - The eQTL analyses in lymphocytes have been described in detail previously (GEO database: GSE8052)<sup>9</sup>. In brief, lymphoblastoid cell lines, derived from peripheral blood lymphocytes were available for 830 parents and offspring of 206 families of white European descent. RNA sample were hybridized to U133 Plus 2.0 GeneChips (Affymetrix) to assess the expression of 54,675 transcripts, representing 20,599 genes. All participants were genotyped using the Illumina Human1M Beadchip and Illumina HumanHap300K Beadchip and genotypes were imputed using the data from the Phase II HapMap CEU population. Before analyses, expression data was normalized together to remove any technical or spurious background variation and subsequently an inverse normal transformation was applied to avoid any outliers. SNPs were tested for *cis* associations, assuming an additive genetic model, adjusting for non-genetic effects in the gene expression value. A *P*-value threshold of <  $6.8 \times 10^{-6}$ , which corresponds to a 1% FDR determined by permutation testing in this dataset, was used for the *cis*-associations presented.



**Liver and subcutaneous and omental fat tissue** - The eQTL analyses in liver, subcutaneous and omental fat tissue have been described in detail previously<sup>8</sup>. In brief, liver (n=567), subcutaneous (n=610) and omental (n=742) fat tissue were obtained from patients who underwent bariatric surgery. RNA was extracted and hybridized to a custom Agilent 44,000 feature microarray composed of 39,280 oligonucleotide probes targeting transcripts representing 34,266 known and predicted genes. All patients were genotyped on the Illumina 650Y SNP genotyping arrays. Gene expression data was adjusted for age, race, gender, and surgery year using linear regression. *Cis*-associations between each SNP and the adjusted gene expression data were tested, and a nominal *P*-value cut-off of  $6 \times 10^{-6}$  corresponding to a 5% FDR was used.

**Brain tissue** - The eQTL analyses in cortical tissue have been described in detail previously (GEO database: GSE8919)<sup>10</sup>. In brief, DNA and RNA of neuropathologically normal cortical brain samples of 193 individuals (mean age 81 years, range 65-100 years) of European descent were isolated. DNA was genotyped using the Affymetrix Gene-Chip Human Mapping 500K Array Set and genotypes were imputed using the data from the Phase II HapMap CEU population. RNA expression was assessed with the Illumina Human Refseq-8 Expression BeadChip system. *Cis*-association analyses assumed an additive model and were adjusted for sex and age at death. Only *cis*-associations with a *P*-value  $< 3.5 \times 10^{-5}$  are presented.

**Cis-association analyses** – SNPs were tested for *cis*-associations with transcripts within a 1Mb region, assuming an additive effect of the BMI allele or using an ANOVA test. Adjustments were specific for each of the tissue datasets. Only *cis*-associations with a  $P < 1 \times 10^{-5}$  for blood and adipose tissue,  $P < 6.8 \times 10^{-5}$  for lymphocytes,  $P < 6.0 \times 10^{-6}$  for liver, omental, and subcutaneous fat, and  $P < 3.5 \times 10^{-5}$  for brain tissue are presented in the table. These *P*-value thresholds correspond to a false discovery rate of 1% for the lymphocytes and 5% for the remaining tissues. Conditional analyses were performed by conditioning the BMI-associated SNP on the most significant *cis*-associated SNP for that particular gene transcript and vice versa. Conditional analyses were performed for all expression data, except for the cortical tissue sample because of the small sample size and thus low statistical power.

#### **2.1.9. Explained variance and additional number of loci to be discovered**

The variation in BMI explained by the 32 confirmed SNPs was estimated from stage 2 analyses using  $2f(1-f)a^2$ , where *f* is the frequency of the variant and *a* is its additive effect<sup>10</sup>. We subsequently estimated how much more of the variance can be explained if more SNPs of the current GWA meta-analyses are considered and how many more loci would have been uncovered if the stage 1 meta-analysis had been larger.

### ***Estimation of variance explained and polygene analysis***

We evaluated the amount of phenotypic variance explained by the 32 BMI loci in an Australian and two Dutch independent validation sets (the Queensland Institute of Medical Research (QIMR) study and The Rotterdam Study (RS) II & III) using a method proposed by the International Schizophrenia Consortium<sup>13</sup>. To avoid the influence of potential cryptic relatedness between discovery and validation sets, we performed analyses by excluding the four Dutch studies from the discovery when using the RSII and RSIII as validation sets. The twelve studies from the United Kingdom from the discovery were excluded for the QIMR validation study.

First, we re-ran the stage 1 meta-analysis excluding the Dutch and UK studies, respectively. A list of independent SNPs associated with BMI at various  $P$ -value thresholds (from  $P < 5 \times 10^{-8}$  to  $P < 0.05$ ) was computed (using the clumping procedure implemented in PLINK, with an LD-based threshold of  $r^2 \geq 0.05$ , and a physical distance of 1 Mb from the top hit).

Second, using this list of independent SNPs from the revised meta-analyses described above, we performed profile scoring for each individual of the two validation studies as implemented in PLINK, where:

$$\text{Score}_i = \sum_{j=1}^m b_j x_{ij}, \text{ where}$$

$m$  = number of SNPs

$b_j$  = effect of allele at locus  $j$

$x_{ij}$  = number of reference alleles of individual  $i$  at locus  $j$

Third, the measure of variance explained (adjusted  $R^2$ ) was estimated from a linear regression model incorporating the score as the predictor and the age-adjusted inverse normal transformed BMI residuals as outcome. We reported the average explained variance weighted by the sample size of each study, while **Fig 4.** shows the study specific explained variance for various  $P$ -values thresholds.

### ***Prediction of number of susceptibility loci***

Based on the distribution of effect sizes and minor allele frequencies observed for the established BMI loci and the power to detect those effects in the combined stage 1 and stage 2 analysis, we estimated the number of susceptibility loci that are likely to exist using a new method<sup>14</sup>. All loci that reached genome-wide significance ( $P < 5 \times 10^{-8}$ ) assuming a GC correction and had a power of at least 1% in the combined stage 1 and stage 2 analysis were included in the prediction. The stage 2 replication data was used to estimate the effect sizes and minor allele frequencies for these loci. Power was calculated based on the combined stage 1 and stage 2 sample sizes accounting for the number of SNPs that could be identified with the particular effect size. The phenotypic variance explained was estimated by summing the product of each effect size and the

number of loci predicted with that particular effect size. A parametric bootstrap method was used to obtain an estimate of the variability of the estimated number of loci.

#### **2.1.10. Conditional analyses**

We performed a conditional genome-wide association analysis to examine whether any of the 32 confirmed BMI loci harbored additional independent signals. Therefore, each individual study repeated stage 1 GWAS analyses, but adjusted for the 32 SNPs in a regression framework. The quality control criteria used for the initial stage 1 analyses was applied here as well. For inclusion of a particular study, we required that each of the 32 conditioned SNPs was no longer associated with BMI (all  $P > 0.2$ ) and that SNPs outside the 32 conditioned loci had similar  $P$ -values and effect sizes to the primary stage 1 analysis. Of the 46 studies that contributed to the primary stage 1 analyses, seven studies ( $N = 18,445$ ) were excluded that appeared to have errors in their conditional analysis and four studies ( $N = 5,753$ ) did not submit conditional analyses due to logistical constraints. Meta-analysis was performed in the same way as for the GWA studies in Stage 1. The threshold for significance was determined to be  $5 \times 10^{-6}$  for independent signals within 1Mb of the conditioned SNPs since we estimated we were examining approximately 1% of the genome.

#### **2.1.11. Gene-by-gene (GxG) interaction**

We examined gene-by-gene interactions among the 32 confirmed BMI loci. First, analyses were performed in each individual study using the extracted genotype imputation dosages for each of the 32 SNPs from the stage 1 meta-analysis (based on 2Mb distance pruning;  $P < 5 \times 10^{-6}$ ). The alleles were coded such that the BMI-increasing allele was always the dosage increasing allele (*i.e.* the BMI-increasing allele was coded as allele 2). Dosages of the pairwise interaction ( $Y = b_0 + b_1.A + b_2.B + b_3.AB + e$ ; Test of  $b_3 = 0$ ) analyses were then regressed against residuals of inverse normal transformed BMI, adjusted for age, age<sup>2</sup> and appropriate covariates (e.g. principal components) to identically match the residuals used in the main effect analyses. Analyses were stratified by sex and case-status (for samples ascertained for other diseases). Each study excluded SNPs from where the minor allele count ( $MAC = 2 * N * MAF$ )  $< 20$  and/or imputation quality was poor (see stage 1 analyses). We meta-analysed the study specific pairwise interaction terms using METAL.

#### **2.1.12. Dominant and recessive analyses**

Dominant and recessive analyses were performed for the 32 confirmed BMI SNPs by each individual study. To test for non-additive effects (*i.e.* dominant or recessive), we performed analyses for four models; *i.e.* an additive, a dominant, a recessive and a dominant deviation model. Deviation from additivity was inferred by testing for evidence of a dominance deviation model.

We used “best guess” genotypes based on genotype dosage, which were regressed against inverse normal transformed BMI, adjusted for age and appropriate covariates (e.g. principal components). Each study excluded SNPs with a minor allele count (MAC = 2\*N\*MAF) of < 20 and/or imputation quality was poor (see stage 1 analyses). The individual study results were meta-analysed using METAL for the additive, dominant, recessive, dominant deviation models. As deviation from additivity is harder to detect when imputation quality is relatively low we also re-ran the meta-analyses excluding SNPs with a minor allele count of < 60 and/or imputation quality < 0.9, but the results were essentially the same. As an additional quality check of the “best guess” genotypes, we repeated the additive model using additive dosage and compared the additive dosage and additive best guess results from this meta-analysis to that from obtained from the primary stage 1 meta-analysis, and the correlations between  $-\log_{10} P$ -values of both analyses were very high ( $r > 0.99$ ).

### 2.1.13. Sex-specific analyses

To examine whether the associations of the 32 confirmed BMI SNPs were different in men and women, we performed the meta-analyses of stage 1 and stage 2 data as described before, stratified by sex ( $n_{\text{women}}=140,490$  and  $n_{\text{men}}=107,795$ ). Subsequently, we tested for each SNP whether the beta of men only ( $b_m$ ) was different from the beta of women only ( $b_w$ ) using the T statistic

$$(b_m - b_w) / (se_m^2 + se_w^2 - 2 * \text{corr}(b_m, b_w) * se_m * se_w)$$

with  $se_m$  and  $se_w$  being the standard errors of  $b_m$  or  $b_w$  from which we estimated the  $P$ -value using the normal approximation.

### 2.1.14. References

1. Zeggini, E. et al. Meta-analysis of genome-wide association data and large-scale replication identifies additional susceptibility loci for type 2 diabetes. *Nat Genet* **40**, 638-45 (2008).
2. Kathiresan, S. et al. Common variants at 30 loci contribute to polygenic dyslipidemia. *Nat Genet* **41**, 56-65 (2009).
3. Dupuis, J. et al. New genetic loci implicated in fasting glucose homeostasis and their impact on type 2 diabetes risk. *Nat Genet.* **42**:105-16 (2010).
4. Saxena, R. et al. Genetic variation in GIPR influences the glucose and insulin responses to an oral glucose challenge. *Nat Genet.* **42**:142-8.
5. Segrè, A.V. et al. Common Inherited Variation in Mitochondrial Genes is not Enriched for Associations with Type 2 Diabetes or Related Glycemic Traits. *PLoS Genetics* **in press** (2010).
6. McCarroll, S.A. et al. Integrated detection and population-genetic analysis of SNPs and copy number variation. *Nat Genet* **40**, 1166-74 (2008).
7. Emilsson, V. et al. Genetics of gene expression and its effect on disease. *Nature* **452**, 423-8 (2008).
8. Zhong, H., Yang, X., Kaplan, L.M., Molony, C. & Schadt, E.E. Integrating pathway analysis and genetics of gene expression for genome-wide association studies. *Am J Hum Genet* **86**, 581-91.

## Supplementary Note

9. Dixon, A.L. et al. A genome-wide association study of global gene expression. *Nat Genet* **39**, 1202-7 (2007).
10. Myers, A.J. et al. A survey of genetic human cortical gene expression. *Nat Genet* **39**, 1494-9 (2007).
11. Thorleifsson, G. et al. Genome-wide association yields new sequence variants at seven loci that associate with measures of obesity. *Nat Genet* **41**, 18-24 (2009).
12. Holm, H. et al. Several common variants modulate heart rate, PR interval and QRS duration. *Nat Genet* **42**, 117-22.
13. Purcell, S.M. et al. Common polygenic variation contributes to risk of schizophrenia and bipolar disorder. *Nature* **460**, 748-52 (2009).
14. Park, J.-H. et al. Estimation of effect size distribution from genome-wide association studies and implications for future discoveries. *Nat Genet* **42**:570-5 (2010).

**2.2. SUPPLEMENTARY NOTE - TABLES**

- Supplementary Note - Table 1** Study design, number of individuals and sample quality control for genome-wide association studies of stage 1. **p. 40**
- Supplementary Note - Table 2** Information on genotyping methods, quality control of SNPs, imputation, and statistical analysis for stage 1 genome-wide association studies. **P. 49**
- Supplementary Note - Table 3** Study-specific descriptive statistics genome-wide association studies of stage 1. **p. 54**
- Supplementary Note - Table 4** Study design, number of individuals and sample quality control for genome-wide association studies of stage 2 - *in silico* and *de novo* replication. **P. 59**
- Supplementary Note - Table 5** Information on genotyping methods, quality control of SNPs, imputation, and statistical analysis for stage 2 *in silico* and *de novo* replication studies. **P. 65**
- Supplementary Note - Table 6** Study-specific descriptive statistics for stage 2 *in silico* and *de novo* replication studies. **P. 68**
- Supplementary Note - Table 7** Study design, number of individuals and sample quality control for studies used in extreme obesity case-control analyses, childhood BMI analyses, family-based analyses and polygenes analyses. **P. 71**
- Supplementary Note - Table 8** Supplementary Note - Table 8 -- Information on genotyping methods, quality control of SNPs, imputation, and statistical analysis for studies used in extreme obesity case-control analyses, childhood BMI analyses, family-based analyses and polygenes analyses. **P. 74**
- Supplementary Note - Table 9** Study-specific descriptive statistics for studies used in extreme obesity case-control analyses, childhood BMI analyses, family-based analyses and polygenes analyses. **P. 76**
- Supplementary Note - Table 10** Nominally significant interactions ( $P_{\text{interaction}} < 0.05$ ) for all pairwise tests between the lead SNPs at the 32 confirmed BMI loci. **p. 78**
- Supplementary Note - Table 11** Dominant, recessive and dominance deviation results for nominally significant (dominance deviation  $P < 0.05$ ) lead SNPs at the 32 confirmed BMI loci. The effect allele is the BMI-increasing allele. Only SNPs with a dominance deviation  $P < 0.05$  are

## Supplementary Note

presented. The results are not significant at  $P < 0.05$  after correcting for the number of tests performed. **P. 80**

**Supplementary Note - Table 12** PubMed and OMIM hits for genes within 500kb of 32 BMI-associated SNPs, using terms "obesity" and "BMI". **P. 82**

**Supplementary Note - Table 13** Assessment of population-stratification by comparison of effect sizes and directions of association between family-based data from Framingham and overall meta-analysis using the QFAM -- within procedure from PLINK. **P. 93**

## Supplementary Note

**Supplementary Note - Table 1** Study design, number of individuals and sample quality control for genome-wide association studies of stage 1.



Supplementary Note - Table 1

Supplementary Note - Table 1 -- Study design, number of individuals and sample quality control for genome-wide association studies of stage 1.

| Study                   |                                                                             | Study design                  | Total sample size (N) | Call rate* | Sample QC                                                                                                                                                                                                                                                               | Samples in analyses (N)**         | Anthropometric assessment method | References                                                                                                                                                                                                                                                                                                                                                                                                                 |
|-------------------------|-----------------------------------------------------------------------------|-------------------------------|-----------------------|------------|-------------------------------------------------------------------------------------------------------------------------------------------------------------------------------------------------------------------------------------------------------------------------|-----------------------------------|----------------------------------|----------------------------------------------------------------------------------------------------------------------------------------------------------------------------------------------------------------------------------------------------------------------------------------------------------------------------------------------------------------------------------------------------------------------------|
| Short name              | Full name                                                                   |                               |                       |            | Study specific QC criteria                                                                                                                                                                                                                                              |                                   |                                  |                                                                                                                                                                                                                                                                                                                                                                                                                            |
| ADVANCE                 | Atherosclerotic Disease, Vascular Function, and Genetic Epidemiology        | Population-based case-control | 599                   | >98.5%     | 1) duplicates<br>2) missing weight or height                                                                                                                                                                                                                            | 586 (275 CAD cases, 311 controls) | measured                         | [PMID: 18443000] Assimes TL et al. Susceptibility locus for clinical and subclinical coronary artery disease at chromosome 9p21 in the multi-ethnic ADVANCE study. Hum Mol Genet. 2008 Aug 1;17(15):2320-8.                                                                                                                                                                                                                |
| AGES                    | Age, Gene/Environment Susceptibility-Reykjavik Study                        | Population-based              | 3219                  | ≥ 97%      | 1) mismatch with previous genotypes<br>2) remove A/T & G/C SNPs<br>3) remove SNPs not in HapMap                                                                                                                                                                         | 3207                              | measured                         | [PMID: 17351290] Harris et al. Age, Gene/Environment Susceptibility-Reykjavik Study: multidisciplinary applied phenomics. American Journal of Epidemiology (2007) vol. 165 (9) pp. 1076-87                                                                                                                                                                                                                                 |
| Amish HAPI Heart Study  | Amish Heredity and Phenotype Intervention Heart Study                       | Founder population            | 915                   | ≥ 93%      | 1) Misidentified pedigree relationships<br>2) Misidentified sex                                                                                                                                                                                                         | 905                               | measured                         | [PMCID: PMC2443415] Mitchell BD, McArdle PF, Shen H, et al. The genetic response to short-term interventions affecting cardiovascular function: Rationale and design of the Heredity and Phenotype Intervention (HAPI) Heart Study. Am Heart J 823:828, 2008<br>[PMID: 18779467] Rampersaud E, Mitchell BD, Pollin TI, et al. Physical Activity and the Association of common FTO Gene Variants with Body Mass Index and   |
| ARIC                    | Atherosclerosis Risk in Communities Study                                   | Population-based              | 15792                 | ≥ 90%      | 1) True sex/gender mismatch<br>2) Discordant genotype with earlier TaqMan genotyping. If >10/47 genotypes discordant -> exclude<br>3) First-degree relative<br>4) PC>8SD in Eigenstrat run (10 iterations with 10 PCs)<br>5) Outlier based on average IBS<br>6) missing | 8108                              | measured                         | [PMID: 2646917] Atherosclerosis Risk in Communities (ARIC) Study: design and objectives. 1989. ARIC Investigators. Am. J. Epidemiol. 129: 687-702.<br>[PMID: 19557197] Heard-Costa, NL et al. NRXN3 is a novel locus for waist circumference: a genome-wide association study from the CHARGE Consortium. 2009. Plos Genet. 5(6): e1000539.                                                                                |
| B58C (T1DGC)            | British 1958 birth cohort (Type 1 Diabetes Genetic Consortium controls)     | Population-based              | 2,592                 | ≥ 98%      | 1) contamination<br>2) non-European identity<br>3) Missing body weight and height.                                                                                                                                                                                      | 2,587                             | measured                         | [PMID: 17255346] Strachan DP, et al. Lifecourse influences on health among British adults: effects of region of residence in childhood and adulthood. Int J Epidemiol 2007;36:522-531.<br>[PMID: 19430480] Barrett JC, The Type 1 Diabetes Genetics Consortium, et al. Genome-wide association study and meta-analysis find that over 40 loci affect risk of type 1 diabetes. Nat Genet 2009 May 10. [Epub ahead of print] |
| B58C (WTCCC)            | British 1958 birth cohort (Wellcome Trust Case Control Consortium controls) | Population-based              | 1,502                 | ≥ 97%      | 1) contamination<br>2) non-European identity<br>3) Missing body weight and height.                                                                                                                                                                                      | 1,479                             | measured                         | [PMID: 17554300] The Wellcome Trust Case Control Consortium Genome-wide association study of 14,000 cases of seven common diseases and 3,000 shared controls. Nature 2007;447: 661-678.<br>[PMID: 16155052] Power,C. & Elliott,J. Cohort profile: 1958 British birth cohort (National Child Development Study). Int J Epidemiol 2006;35:34-41.                                                                             |
| BRIGHT (WTCCC-HT) Cases | The British Genetics of Hypertension (BRIGHT) Study                         | Hypertension case series      | 2,000                 | ≥ 97%      | 1) heterozygosity <23% or >30%<br>2) external discordance<br>3) non-European ancestry<br>4) duplicate/first/second degree relatives.                                                                                                                                    | 1,895                             | measured                         | [PMID: 17554300] The Wellcome Trust Case Control Consortium Genome-wide association study of 14,000 cases of seven common diseases and 3,000 shared controls. Nature 447, 661-678 (2007).<br>[PMID: 12826435] Caulfield,M. et al. Genome-wide mapping of human loci for essential hypertension. Lancet 361, 2118-2123 (2003).                                                                                              |

Supplementary Note - Table 1

| Study          |                                                                                                                                     |                                       | Total sample size (N) | Call rate* | Sample QC<br>Study specific QC criteria                                                                                                                   | Samples in analyses (N)** | Anthropometric assessment method | References                                                                                                                                                                                                                      |
|----------------|-------------------------------------------------------------------------------------------------------------------------------------|---------------------------------------|-----------------------|------------|-----------------------------------------------------------------------------------------------------------------------------------------------------------|---------------------------|----------------------------------|---------------------------------------------------------------------------------------------------------------------------------------------------------------------------------------------------------------------------------|
| Short name     | Full name                                                                                                                           | Study design                          |                       |            |                                                                                                                                                           |                           |                                  |                                                                                                                                                                                                                                 |
| CAD_WTCCC      | WTCCC Coronary Heart Disease cases                                                                                                  | case series                           | 2000                  | ≥ 97%      | 1) heterozygosity <23% or >30%;<br>2) discrepancy with external identifying information;<br>3) ethnic outliers;<br>4) related individuals and duplicates; | 1876                      | self reported                    | [PMID: 17554300] The Wellcome Trust Case Control Consortium Genome-wide association study of 14,000 cases of seven common diseases and 3,000 shared controls. Nature 447, 661-678 (2007)                                        |
| CAPS1 Cases    | Cancer Prostate in Sweden 1                                                                                                         | Case-control study of prostate cancer | 505                   | > 95%      | 1) related individuals and duplicates;<br>2) ethnic outliers;<br>3) missing body weight and height.                                                       | 505                       | self-reported                    | [PMID: 18073375] Duggan D, et al. Two genome-wide association studies of aggressive prostate cancer implicate putative prostate tumor suppressor gene DAB2IP. J Natl Cancer Inst 2007 Dec 19;99(24):1836-44 (2007).             |
| CAPS1 Controls | Cancer Prostate in Sweden 1                                                                                                         | Case-control study of prostate cancer | 506                   | > 95%      | 1) related individuals and duplicates;<br>2) ethnic outliers;<br>3) missing body weight and height.                                                       | 506                       | self-reported                    | [PMID: 18073375] Duggan D, et al. Two genome-wide association studies of aggressive prostate cancer implicate putative prostate tumor suppressor gene DAB2IP. J Natl Cancer Inst 2007 Dec 19;99(24):1836-44 (2007).             |
| CAPS2 Cases    | Cancer Prostate in Sweden 2                                                                                                         | Case-control study of prostate cancer | 1,483                 | > 95%      | 1) related individuals and duplicates;<br>2) ethnic outliers;<br>3) missing body weight and height.                                                       | 1,483                     | self-reported                    | [PMID: 18073375] Duggan D, et al. Two genome-wide association studies of aggressive prostate cancer implicate putative prostate tumor suppressor gene DAB2IP. J Natl Cancer Inst 2007 Dec 19;99(24):1836-44 (2007).             |
| CAPS2 Controls | Cancer Prostate in Sweden 2                                                                                                         | Case-control study of prostate cancer | 519                   | > 95%      | 1) related individuals and duplicates;<br>2) ethnic outliers;<br>3) missing body weight and height.                                                       | 519                       | self-reported                    | [PMID: 18073375] Duggan D, et al. Two genome-wide association studies of aggressive prostate cancer implicate putative prostate tumor suppressor gene DAB2IP. J Natl Cancer Inst 2007 Dec 19;99(24):1836-44 (2007).             |
| CHS            | Cardiovascular Health Study                                                                                                         | Population-based cohort study         | 3228                  | >95%       | 1) Prevalent clinical CVD<br>2) African-americans<br>3) Sex discordant<br>4) Missing body weight and height                                               | 3228                      | measured                         | [PMID: 1669507] Fried LP, Borhani NO, Enright P, Furberg CD, Gardin JM, Kronmal RA, Kuller LH, Manolio TA, Mittelmark MB, Newman A. The Cardiovascular Health Study: design and rationale. Ann Epidemiol. 1991; 1: 263-276.     |
| CoLaus         | Cohorte Lausannoise                                                                                                                 | Population-based                      | 6188                  | >90%       | 1) ethnic outliers;<br>2) related individuals and duplicates;<br>3) Missing body weight and height                                                        | 5408                      | measured                         | [PMID 18366642] Firmann et al. The CoLaus study: a population-based study to investigate the epidemiology and genetic determinants of cardiovascular risk factors and metabolic syndrome BMC Cardiovascular Disorders 2008, 8:6 |
| deCODE         | deCODE genetics sample set                                                                                                          | Population-based                      | 38,446                | ≥ 96%      | Missing body weight and height.                                                                                                                           | 26,799                    | measured                         | [PMID: 19079260] Thorleifsson, G. et al. Genome-wide association yields new sequence variants at seven loci that associate with measures of obesity. Nat Genet. 41, 18-24 (2009).                                               |
| DGI (cases)    | Diabetes Genetics Initiative of Broad Institute of Harvard and MIT, Lund University, and Novartis Institutes of BioMedical Research | Case control for diabetes             | 1658                  | ≥ 95%      | 1) Related individuals<br>2. Sample contamination<br>3) Missing body weight and height.                                                                   | 1317                      | measured                         | [PMID: 17463246] Saxena et al. Genome-wide association analysis identifies loci for type 2 diabetes and triglyceride levels. Science 316, 1331-6 (2007).                                                                        |

Supplementary Note - Table 1

| Study              |                                                                                                                                     |                                      | Total sample size (N) | Call rate* | Sample QC<br>Study specific QC criteria                                                                                                                                                                        | Samples in analyses (N)** | Anthropometric assessment method | References                                                                                                                                                                                                                                                                                                                                                                                                                                                                                                                                                                                                |
|--------------------|-------------------------------------------------------------------------------------------------------------------------------------|--------------------------------------|-----------------------|------------|----------------------------------------------------------------------------------------------------------------------------------------------------------------------------------------------------------------|---------------------------|----------------------------------|-----------------------------------------------------------------------------------------------------------------------------------------------------------------------------------------------------------------------------------------------------------------------------------------------------------------------------------------------------------------------------------------------------------------------------------------------------------------------------------------------------------------------------------------------------------------------------------------------------------|
| Short name         | Full name                                                                                                                           | Study design                         |                       |            |                                                                                                                                                                                                                |                           |                                  |                                                                                                                                                                                                                                                                                                                                                                                                                                                                                                                                                                                                           |
| DGI (controls)     | Diabetes Genetics Initiative of Broad Institute of Harvard and MIT, Lund University, and Novartis Institutes of BioMedical Research | Case control for diabetes            | 1595                  | ≥ 95%      | 1) Related individuals<br>2) Sample contamination<br>3) Missing body weight and height.                                                                                                                        | 1088                      | measured                         | [PMID: 17463246] Saxena et al. Genome-wide association analysis identifies loci for type 2 diabetes and triglyceride levels. <i>Science</i> 316, 1331-6 (2007).                                                                                                                                                                                                                                                                                                                                                                                                                                           |
| EGCUT              | Estonian Genome Center, University of Tartu                                                                                         | Population-based                     | 1412                  | ≥ 95%      | 1) Related individuals and duplicates<br>2) Sex mismatch<br>3) Phenotype missing                                                                                                                               | 1412                      | measured                         | [PMID: 19424496] Nelis M, Esko T, Magi R, Zimprich F, Zimprich A, et al. (2009) Genetic Structure of Europeans: A View from the North–East. <i>PLoS ONE</i> 4(5): e5472.<br>[PMID: 15133739] Metspalu, A. The Estonian Genome Project. <i>Drug Development Research</i> 62, 97-101 (2004).                                                                                                                                                                                                                                                                                                                |
| EPIC-Obesity Study | European Prospective Investigation into Cancer and Nutrition - Obesity Study                                                        | Population-based                     | 2,566                 | ≥ 94%      | 1) heterozygosity <23% or >30%;<br>2) >5.0% discordance in SNP pairs with r <sup>2</sup> = 1 in HapMap;<br>3) ethnic outliers;<br>4) related individuals and duplicates;<br>5) Missing body weight and height. | 2,415                     | measured                         | [PMID: 10466767] Day, N.E. et al. EPIC-Norfolk: study design and characteristics of the cohort. <i>European Prospective Investigation of Cancer. British Journal of Cancer</i> 80, 95-103 (1999).<br>[PMID: 18454148] Loos, R.J. et al. Common variants near MC4R are associated with fat mass, weight and risk of obesity. <i>Nat Genet</i> 40, 768-775 (2008).                                                                                                                                                                                                                                          |
| ERF                | Erasmus Rucphen Family (EUROSPAN)                                                                                                   | family based                         | 2300                  | > 95%      | 1) excess heterozygosity based on FDR<br>2) ethnic outliers<br>3) sex mismatch<br>4) missing phenotype                                                                                                         | 2090                      | measured                         | [PMID: 15054401] Aulchenko YS, Heutink P, Mackay I, Bertoli-Avella AM, Pullen J, et al. (2004) Linkage disequilibrium in young genetically isolated Dutch population. <i>Eur J Hum Genet</i> 12: 527-534<br>[PMID: 20049090] Pecioska S, Zillikens MC, Henneman P, Snijders PJ, Oostra BA, van Duijn CM, Aulchenko YS. Association between type 2 diabetes loci and measures of fatness. <i>PLoS One</i> 5, e8541 (2010).                                                                                                                                                                                 |
| Fenland            | Fenland Study                                                                                                                       | Population-based                     | 1,500                 | ≥ 95%      | 1) heterozygosity <27.3% or >28.8%;<br>2) duplicate check;<br>3) relatedness check                                                                                                                             | 1402                      | measured                         | [PMID: 19079261] Willer CJ, Speliotes EK, Loos RJ et al. (2009) Six new loci associated with body mass index highlight a neuronal influence on body weight regulation. <i>Nat Genet</i> , 41(1): 25-34.                                                                                                                                                                                                                                                                                                                                                                                                   |
| FHS cases          | Family Heart Study                                                                                                                  | Case-Controls                        | 463                   | ≥ 98%      | 1) technical errors<br>2) discrepancies between reported sex and sex-diagnostic markers                                                                                                                        | 441                       | measured                         | [PMID: 8651220] M. Higgins et al., NHLBI Family Heart Study: objectives and design, <i>Am J Epidemiol</i> 143, 1219–1228 (1996).                                                                                                                                                                                                                                                                                                                                                                                                                                                                          |
| FHS controls       | Family Heart Study                                                                                                                  | Case-Controls                        | 434                   | ≥ 98%      | 1) technical errors<br>2) discrepancies between reported sex and sex-diagnostic markers                                                                                                                        | 416                       | measured                         | [PMID: 8651220] M. Higgins et al., NHLBI Family Heart Study: objectives and design, <i>Am J Epidemiol</i> 143, 1219–1228 (1996).                                                                                                                                                                                                                                                                                                                                                                                                                                                                          |
| FRAM               | Framingham Heart Study                                                                                                              | Population-based, multi-generational | 9274                  | ≥ 97%      | 1) pHWE<1e-6 call rate<97%<br>2) mishap p<1e-9<br>3) MAF<0.01<br>4) Mendelian errors>100<br>5) SNPs not in Hapmap or strandedness issues merging with Hapmap                                                   | 8094                      | measured                         | [PMID 14025561] DAWBER TR, KANNEL WB, LYELL LP. An approach to longitudinal studies in a community: the Framingham Study. <i>Ann N Y Acad Sci.</i> 1963;107:539-556.<br>[PMID 1208363] Feinleib M, KANNEL WB, Garrison RJ, McNamara PM, Castelli WP. The Framingham Offspring Study. Design and preliminary data. <i>Prev Med.</i> 1975;4:518-525.<br>[PMID 17372189] Splansky GL, Corey D, Yang Q et al. The Third Generation Cohort of the National Heart, Lung, and Blood Institute's Framingham Heart Study: design, recruitment, and initial examination. <i>Am J Epidemiol.</i> 2007;165:1328-1335. |

Supplementary Note - Table 1

| Study            |                                                                                                                | Study design                             | Total sample size (N) | Call rate* | Sample QC                                                                                                                            | Samples in analyses (N)** | Anthropometric assessment method | References                                                                                                                                                                                                                                                   |
|------------------|----------------------------------------------------------------------------------------------------------------|------------------------------------------|-----------------------|------------|--------------------------------------------------------------------------------------------------------------------------------------|---------------------------|----------------------------------|--------------------------------------------------------------------------------------------------------------------------------------------------------------------------------------------------------------------------------------------------------------|
| Short name       | Full name                                                                                                      |                                          |                       |            | Study specific QC criteria                                                                                                           |                           |                                  |                                                                                                                                                                                                                                                              |
| FTC              | Finnish Twin Cohort                                                                                            | Monozygotic twins                        | 152 pairs             | ≥ 95%      | 1) ethnic outliers;<br>2) related individuals and duplicates;<br>3) Missing body weight and height for both individuals of the pair. | 138 pairs                 | measured                         | [PMID: 19060911] Aulchenko YS, Ripatti S, Lindqvist I et al. Loci influencing lipid levels and coronary heart disease risk in 16 European population cohorts, Nat Genet (2009) 41(1): 47-55.                                                                 |
| FUSION cases     | Finland-United States Investigation of NIDDM Genetics                                                          | Case-control                             | 1161                  | > 97.5%    | related individuals; missing BMI                                                                                                     | 857                       | measured                         | [PMID: 17463248] Scott,LJ et al. A genome-wide association study of type 2 diabetes in Finns detects multiple susceptibility variants. Science 316(5829):1341-5 (2007).                                                                                      |
| FUSION controls  | Finland-United States Investigation of NIDDM Genetics                                                          | Case-control                             | 1174                  | > 97.5%    | related individuals; missing BMI                                                                                                     | 869                       | measured                         | [PMID: 17463248] Scott,LJ et al. A genome-wide association study of type 2 diabetes in Finns detects multiple susceptibility variants. Science 316(5829):1341-5 (2007).                                                                                      |
| GENMETS cases    | Health 2000 / GENMETS substudy                                                                                 | Case-control study of Metabolic syndrome | 932                   | ≥ 95%      | 1) ethnic outliers;<br>2) related individuals and duplicates;<br>3) Missing body mass index                                          | 1092                      | measured                         | <a href="http://www.terveys2000.fi/indexe.html">http://www.terveys2000.fi/indexe.html</a>                                                                                                                                                                    |
| GENMETS controls | Health 2000 / GENMETS substudy                                                                                 | Case-control study of Metabolic syndrome | 948                   | ≥ 95%      | 1) ethnic outliers;<br>2) related individuals and duplicates;<br>3) Missing body mass index                                          | 1171                      | measured                         | <a href="http://www.terveys2000.fi/indexe.html">http://www.terveys2000.fi/indexe.html</a>                                                                                                                                                                    |
| GerMiFSI         | German Myocard Infarct Family Study I                                                                          | Case - Control (only Cases)              | 875                   | > 97%      | 1) related individuals and duplicates;<br>2)missing phenotypes<br>3) heterozygosity mean +- 3*sd outlier                             | 600                       | measured                         | [PMID: 17634449 ] Samani NJ, Erdmann J, Hall AS et al. Genomewide association study of coronary artery disease. NEJM 2007; 357(5): 436-9.                                                                                                                    |
| GerMiFSII        | German Myocard Infarct Family Study II                                                                         | Case – Control (only Cases)              | 1222                  | > 97%      | 1) related individuals and duplicates;<br>2)missing phenotypes<br>3) heterozygosity mean +-3*sd outlier                              | 1124                      | measured                         | [PMID: 19198612] Erdmann J, Grosshennig A, Braund PS et al. New susceptibility locus for coronary artery disease on chromosome 3q22.3. Nat Genet 2009; 41(3): 280-2.                                                                                         |
| KORA3            | Cooperative Health Research in the Region of Augsburg, KOoperative Gesundheitsforschung in der Region Augsburg | Population-based                         | 1644                  | >=93%      | 1) All with German passport                                                                                                          | 1644                      | measured                         | [PMID 20031538] Heid IM, Boes E, Müller M, Kollerits B, et al. Genome-wide association analysis of high-density lipoprotein cholesterol in the population-based KORA study sheds new light on intergenic regions. Circ Cardiovasc Genet, 2008; 1(10): 10-20. |
| KORA4            | Cooperative Health Research in the Region of Augsburg, KOoperative Gesundheitsforschung in der Region Augsburg | Population-based                         | 1814                  | >=93%      | 1) All with German passport                                                                                                          | 1814                      | measured                         | [PMID 16032514] Wichmann HE, Gieger C, Illig T; MONICA/KORA Study Group. KORA-gen--resource for population genetics, controls and a broad spectrum of disease phenotypes. Gesundheitswesens 2005; 67 Suppl 1: S26-30.                                        |

Supplementary Note - Table 1

| Study            |                                           | Study design                    | Total sample size (N) | Call rate* | Sample QC                                                                                                                                                                                                                                | Samples in analyses (N)** | Anthropometric assessment method | References                                                                                                                                                                                                                                                                                                                                                                                                                                                                                                                                                                               |
|------------------|-------------------------------------------|---------------------------------|-----------------------|------------|------------------------------------------------------------------------------------------------------------------------------------------------------------------------------------------------------------------------------------------|---------------------------|----------------------------------|------------------------------------------------------------------------------------------------------------------------------------------------------------------------------------------------------------------------------------------------------------------------------------------------------------------------------------------------------------------------------------------------------------------------------------------------------------------------------------------------------------------------------------------------------------------------------------------|
| Short name       | Full name                                 |                                 |                       |            | Study specific QC criteria                                                                                                                                                                                                               |                           |                                  |                                                                                                                                                                                                                                                                                                                                                                                                                                                                                                                                                                                          |
| MICROS           | MICROS (EUROSPAN)                         | Population-based                | 1098                  | ≥ 97%      | 1) ethnic outliers;<br>2) duplicates;<br>3) Missing body weight and height.                                                                                                                                                              | 1079                      | measured                         | [PMID: 17550581 ] Pattaro C, Marroni F, Riegler A, et al. The genetic study of three population microisolates in South Tyrol (MICROS): study design and epidemiological perspectives. BMC Med Genet. 2007 Jun 5;8-29.<br>[PMID: 18952825] Johansson A. et al. Common variants in the JAZF1 gene associated with height identified by linkage and genome-wide association analysis. Hum Mol Genet. 18(2), 373-80 (2009).<br>[PMID: 19798445] Hicks, AA. et al. Genetic determinants of circulating sphingolipid concentrations in European populations. PLoS Genet. 5(10):e1000672 (2009) |
| Migen (cases)    | Myocardial Infarction Genetics Consortium | Case control for early onset MI | 1420                  | ≥ 95%      | 1) Cohort deficient or excess heterozygosity<br>2) Population Stratification outliers<br>3) Close Relatives and Sample Duplicates<br>4) Sample Contamination (excess close low-level genome sharing)<br>5) missing body weight or height | 1274                      | measured                         | [PMID: 19198609] Kathiresan et al. Genome-wide association of early-onset myocardial infarction with single nucleotide polymorphisms and copy number variants. Nature Genetics 41, 334-41 (2009).                                                                                                                                                                                                                                                                                                                                                                                        |
| Migen (controls) | Myocardial Infarction Genetics Consortium | Case control for early onset MI | 1558                  | ≥ 95%      | 1) Cohort deficient or excess heterozygosity<br>2) Population Stratification outliers<br>3) Close Relatives and Sample Duplicates<br>4) Sample Contamination (excess close low-level genome sharing)<br>5) Missing body weight or height | 1407                      | measured                         | [PMID: 19198609] Kathiresan et al. Genome-wide association of early-onset myocardial infarction with single nucleotide polymorphisms and copy number variants. Nature Genetics 41, 334-41 (2009).                                                                                                                                                                                                                                                                                                                                                                                        |
| NBS_WTCCC        | WTCCC National Blood Service donors       | Population-based                | 1500                  | ≥ 97%      | 1) heterozygosity <23% or >30%;<br>2) discrepancy with external identifying information;<br>3) ethnic outliers;<br>4) related individuals and duplicates;                                                                                | 1437                      | self reported                    | [PMID: 17554300] The Wellcome Trust Case Control Consortium Genome-wide association study of 14,000 cases of seven common diseases and 3,000 shared controls. Nature 447, 661-678 (2007)                                                                                                                                                                                                                                                                                                                                                                                                 |
| NFBC-1966        | Northern Finland Birth Cohorts 1966       | Population-based                | 5654                  | ≥ 95%      | 1) gender discrepancy with genetic data from X-linked markers;<br>2) withdrawn consent;<br>3) duplicates and first and second degree relatives;<br>4) contaminated samples                                                               | 4773                      | measured                         | [PMID: 19060910 ] Sabatti, C. et al. Genome-wide association analysis of metabolic traits in a birth cohort from a founder population. Nat Genet (2008).                                                                                                                                                                                                                                                                                                                                                                                                                                 |

Supplementary Note - Table 1

| Study             |                                                                             | Study design        | Total sample size (N) | Call rate* | Sample QC                                                                                                                                                    | Samples in analyses (N)** | Anthropometric assessment method | References                                                                                                                                                                                                                                                                                                                                                                                                                                                                                                                                                                                                                                                  |
|-------------------|-----------------------------------------------------------------------------|---------------------|-----------------------|------------|--------------------------------------------------------------------------------------------------------------------------------------------------------------|---------------------------|----------------------------------|-------------------------------------------------------------------------------------------------------------------------------------------------------------------------------------------------------------------------------------------------------------------------------------------------------------------------------------------------------------------------------------------------------------------------------------------------------------------------------------------------------------------------------------------------------------------------------------------------------------------------------------------------------------|
| Short name        | Full name                                                                   |                     |                       |            | Study specific QC criteria                                                                                                                                   |                           |                                  |                                                                                                                                                                                                                                                                                                                                                                                                                                                                                                                                                                                                                                                             |
| NHS               | The Nurses' Health Study                                                    | Nested case-control | 2368                  | >90%       | 1) Low genotyping completion (<90%)<br>2) Unclear identity and admixed origin<br>3) Missing body weight and height;                                          | 2265                      | self-reported                    | [PMID: 17529973] Hunter D, et al. A genome-wide association study identifies alleles in FGFR2 associated with risk of sporadic postmenopausal breast cancer. Nat Genet. 2007 Jul;39(7):870-4.                                                                                                                                                                                                                                                                                                                                                                                                                                                               |
| NSPHS             | Northern Sweden Population Health Study (EUROSPAN)                          | Population-based    | 720                   | ≥ 97%      | 1) ethnic outliers;<br>2) duplicates;<br>3) Missing body weight and height.                                                                                  | 647                       | measured                         | [PMID: 18952825] Johansson A. et al. Common variants in the JAZF1 gene associated with height identified by linkage and genome-wide association analysis. Hum Mol Genet. 18(2), 373-80 (2009).<br>[PMID: 19798445] Hicks, AA. et al. Genetic determinants of circulating sphingolipid concentrations in European populations. PLoS Genet. 5(10):e1000672 (2009)                                                                                                                                                                                                                                                                                             |
| NTRNESDA cases    | Netherlands Twin Register & the Netherlands Study of Depression and Anxiety | case-control        | 1860                  | ≥ 95%      | 1) evidence of sample contamination (heterozygosity);<br>2) ethnic outliers;<br>3) related individuals and duplicates;<br>5) missing body weight and height. | 1727                      | measured                         | Boomsma DI, de Geus EJ, Vink JM, Stubbe JH, Distel MA, Hottenga JJ et al. Netherlands Twin Register: from twins to twin families. Twin Res Hum Genet 2006; 9: 849–857.<br>[PMID: 18763692] Penninx B, Beekman A, Smit J. The Netherlands Study of Depression and Anxiety (NESDA): rationales, objectives and methods. Int J Methods Psychiatr Res 2008; 17: 121–140.<br>[PMID: 18197199] Boomsma DI, Willemsen G, Sullivan PF, Heutnik P, Meijer P, Sondervan D et al. Genome-wide association of major depression: Description of samples for the GAIN major depressive disorder study: NTR and NESDA Biobank Projects. Eur J Hum Genet 2008; 16: 335–342. |
| NTRNESDA controls | Netherlands Twin Register & the Netherlands Study of Depression and Anxiety | case-control        | 1860                  | ≥ 95%      | 1) evidence of sample contamination (heterozygosity);<br>2) ethnic outliers;<br>3) related individuals and duplicates;<br>5) missing body weight and height. | 1789                      | measured                         | Boomsma DI, de Geus EJ, Vink JM, Stubbe JH, Distel MA, Hottenga JJ et al. Netherlands Twin Register: from twins to twin families. Twin Res Hum Genet 2006; 9: 849–857.<br>[PMID: 18763692] Penninx B, Beekman A, Smit J. The Netherlands Study of Depression and Anxiety (NESDA): rationales, objectives and methods. Int J Methods Psychiatr Res 2008; 17: 121–140.<br>[PMID: 18197199] Boomsma DI, Willemsen G, Sullivan PF, Heutnik P, Meijer P, Sondervan D et al. Genome-wide association of major depression: Description of samples for the GAIN major depressive disorder study: NTR and NESDA Biobank Projects. Eur J Hum Genet 2008; 16: 335–342. |
| ORCADES           | Orkney Complex Disease Study (EUROSPAN)                                     | Population-based    | 719                   | ≥ 97%      | 1) ethnic outliers;<br>2) duplicates;<br>3) Missing body weight and height.                                                                                  | 697                       | measured                         | [PMID: 18952825] Johansson A. et al. Common variants in the JAZF1 gene associated with height identified by linkage and genome-wide association analysis. Hum Mol Genet. 18(2), 373-80 (2009).<br>[PMID: 19798445] Hicks, AA. et al. Genetic determinants of circulating sphingolipid concentrations in European populations. PLoS Genet. 5(10):e1000672 (2009)                                                                                                                                                                                                                                                                                             |
| PLCO              | Prostate, Lung, Colorectal and Ovarian Cancer Screening Trial               | Population-based    | 2,298                 | ≥ 94%      | 1) Gender discordance<br>2) Non-European ancestry<br>3) Related individuals and duplicates;<br>4) Missing height.                                            | 2238                      | self-report                      | [PMID: 17401363] Yeager M, et al. Genome-wide association study of prostate cancer identifies a second risk locus at 8q24. Nat Genet 39, 645-9 (2007).                                                                                                                                                                                                                                                                                                                                                                                                                                                                                                      |

Supplementary Note - Table 1

| Study           |                                                                                                  |                                       | Total sample size (N) | Call rate* | Sample QC                                                                                                                                                                                                                                                                 | Samples in analyses (N)** | Anthropometric assessment method | References                                                                                                                                                                                                                                                                                                                                                                                                                                                                                                                                         |
|-----------------|--------------------------------------------------------------------------------------------------|---------------------------------------|-----------------------|------------|---------------------------------------------------------------------------------------------------------------------------------------------------------------------------------------------------------------------------------------------------------------------------|---------------------------|----------------------------------|----------------------------------------------------------------------------------------------------------------------------------------------------------------------------------------------------------------------------------------------------------------------------------------------------------------------------------------------------------------------------------------------------------------------------------------------------------------------------------------------------------------------------------------------------|
| Short name      | Full name                                                                                        | Study design                          |                       |            | Study specific QC criteria                                                                                                                                                                                                                                                |                           |                                  |                                                                                                                                                                                                                                                                                                                                                                                                                                                                                                                                                    |
| Procardis       | Precocious Coronary Artery Disease (ProCARDIS)                                                   | case-control                          | 2573                  | > 95%      | none                                                                                                                                                                                                                                                                      | 3,212                     | measured                         | Broadbent, H.M. et al. Susceptibility to coronary artery disease and diabetes is encoded by distinct, tightly linked SNPs in the ANRIL locus on chromosome 9p. Hum Mol Genet 17, 806-14 (2008).                                                                                                                                                                                                                                                                                                                                                    |
| RS-I            | Rotterdam Study I                                                                                | Population-based                      | 7,983                 | ≥ 97.5%    | 1) missing DNA;<br>2) gender mismatch with typed X-linked markers;<br>3) excess autosomal heterozygosity > 0.336~FDR>0.1%;<br>4) duplicates and/or 1st or 2nd degree relatives using IBS probabilities >97% from PLINK;<br>5) ethnic outliers using IBS distances > 3SD f | 5,744                     | measured                         | [PMID: 11753597] Visscher, 2001 A comparison of body mass index, waist-hip ratio and waist circumference as predictors of all-cause mortality among the elderly: the Rotterdam study<br>[PMID:19700477] Estrada, 2009 GRIMP: a web- and grid-based tool for high-speed analysis of large-scale genome-wide association using imputed data<br>[PMID:19728115] Hofman, 2009 The Rotterdam Study: 2010 objectives and design update<br>[PMID:1833235] Hofman, 1991 Determinants of disease and disability in the elderly: the Rotterdam Elderly Study |
| RUNMC           | Nijmegen Bladder Cancer Study and Nijmegen Biomedical Study                                      | Case-study and Population-based study | 3,081                 | ≥ 96%      | Missing body weight and height.                                                                                                                                                                                                                                           | 2,873                     | measured                         | [PMID: 17568781] Wetzels, J.F. et al. Age- and gender-specific reference values of estimated GFR in Caucasians: the Nijmegen Biomedical Study. Kidney Int 72, 632-637 (2007). [PMID: 18794855] Kiemeny, L.A. et al. Sequence variant on 8q24 confers susceptibility to urinary bladder cancer. Nat Genet 40, 1307-1312 (2008).                                                                                                                                                                                                                     |
| SardinIA        | SardinIA                                                                                         | Population-based                      | 6,148                 | ≥ 95%      | 1) Missing BMI                                                                                                                                                                                                                                                            | 4,301                     | measured                         | [PMID: 16934002] Pilia, G. et al. Heritability of cardiovascular and personality traits in 6,148 Sardinians. PLoS Genet 2, e132 (2006).<br>[PMID: 17658951] Scuteri et al Genome-wide association scan shows genetic variants in the FTO gene are associated with obesity-related traits. PLoS Genet. 2007 Jul;3(7):e115.                                                                                                                                                                                                                          |
| SASBAC Cases    | Swedish And Singapore Breast Association Consortium                                              | Case-control study of breast cancer   | 803                   | ≥ 96%      | 1) related individuals and duplicates;<br>2) ethnic outliers;<br>3) missing body weight and height.                                                                                                                                                                       | 795                       | self-reported                    | [PMID: 10209946] Magnusson, C. et al. Breast-cancer risk following long-term oestrogen- and oestrogen-progestin-replacement therapy. Int J Cancer 81, 339-44 (1999).<br>[PMID: 17132159] Einarsdóttir, K. et al. Comprehensive analysis of the ATM, CHEK2 and ERBB2 genes in relation to breast tumour characteristics and survival: a population-based case-control and follow-up study. Breast Cancer Res 8, R67 (2006).                                                                                                                         |
| SASBAC Controls | Swedish And Singapore Breast Association Consortium                                              | Case-control study of breast cancer   | 764                   | ≥ 96%      | 1) related individuals and duplicates;<br>2) ethnic outliers;<br>3) missing body weight and height.                                                                                                                                                                       | 764                       | self-reported                    | [PMID: 10209946] Magnusson, C. et al. Breast-cancer risk following long-term oestrogen- and oestrogen-progestin-replacement therapy. Int J Cancer 81, 339-44 (1999).<br>[PMID: 17132159] Einarsdóttir, K. et al. Comprehensive analysis of the ATM, CHEK2 and ERBB2 genes in relation to breast tumour characteristics and survival: a population-based case-control and follow-up study. Breast Cancer Res 8, R67 (2006).                                                                                                                         |
| SEARCH/UKOPS    | Studies of Epidemiology and Risk factors in Cancer Heredity / UK Ovarian Cancer Population Study | Population-based                      | 1710                  | ≥ 80%      | 1) ethnic outliers<br>2) duplicates<br>3) Missing body weight and height                                                                                                                                                                                                  | 1556                      | self-reported                    | [PMID: 19648919] H. Song, S. J. Ramus, J. Tyrer et al. A genome-wide association study identifies a new ovarian cancer susceptibility locus on 9p22.2. Nature Genetics, 41, p996-1000, (2009).                                                                                                                                                                                                                                                                                                                                                     |
| SHIP            | Study of Health in Pomerania                                                                     | Population-based                      | 4310                  | ≥ 92%      | 1) missing genotype or phenotype data                                                                                                                                                                                                                                     | 4092                      | measured                         | [PMID: 20167617] Völzke H, et al. Cohort Profile: The Study of Health in Pomerania. Int J Epidemiol. Online (2010).                                                                                                                                                                                                                                                                                                                                                                                                                                |

Supplementary Note - Table 1

| Study      |                             | Study design     | Total sample size (N) | Call rate* | Sample QC                                                                                                                                                 | Samples in analyses (N)** | Anthropometric assessment method | References                                                                                                                                                                                                                                                                                                                                                                    |
|------------|-----------------------------|------------------|-----------------------|------------|-----------------------------------------------------------------------------------------------------------------------------------------------------------|---------------------------|----------------------------------|-------------------------------------------------------------------------------------------------------------------------------------------------------------------------------------------------------------------------------------------------------------------------------------------------------------------------------------------------------------------------------|
| Short name | Full name                   |                  |                       |            | Study specific QC criteria                                                                                                                                |                           |                                  |                                                                                                                                                                                                                                                                                                                                                                               |
| T2D_WTCCC  | WTCCC Type 2 Diabetes cases | case series      | 1999                  | ≥ 97%      | 1) heterozygosity <23% or >30%;<br>2) discrepancy with external identifying information;<br>3) ethnic outliers;<br>4) related individuals and duplicates; | 1903                      | measured                         | The Wellcome Trust Case Control Consortium Genome-wide association study of 14,000 cases of seven common diseases and 3,000 shared controls. <i>Nature</i> 447, 661-678 (2007)                                                                                                                                                                                                |
| TwinsUK    | TwinsUK                     | Twins pair       | 2226                  | ≥ 95%      | 1) heterozygosity <33% or >37%;<br>2) ethnic outliers;<br>3) related individuals and duplicates;<br>4) Missing body weight and height.                    | 1477                      | measured                         | [PMID: 17254428] Spector, T.D., Williams, F.M. The UK Adult Twin Registry (TwinsUK). <i>Twin Res Hum Genet</i> 9, 899-906 (2006).<br>[PMID: 12537873] Spector, T.D., MacGregor, A.J. The St. Thomas' UK Adult Twin Registry. <i>Twin Res</i> 5, 440-443 (2002).                                                                                                               |
| VIS        | VIS (EUROSPAN) and KORCULA  | Population-based | 795                   | ≥ 97%      | 1) ethnic outliers;<br>2) duplicates;<br>3) Missing body weight and height.                                                                               | 770                       | measured                         | [PMID: 18952825] Johansson A. et al. Common variants in the JAZF1 gene associated with height identified by linkage and genome-wide association analysis. <i>Hum Mol Genet.</i> 18(2), 373-80 (2009).<br>[PMID: 19798445] Hicks, AA. et al. Genetic determinants of circulating sphingolipid concentrations in European populations. <i>PLoS Genet.</i> 5(10):e1000672 (2009) |

\*Sample genotyping success rate; i.e. percentage of successfully genotyped SNPs per sample

\*\*Ns reported are numbers of individuals association data was provided for; Ns in paper may vary due to effective sample size used in meta-analyses



## Supplementary Note

**Supplementary Note - Table 2** Information on genotyping methods, quality control of SNPs, imputation, and statistical analysis for stage 1 genome-wide association studies.

Supplementary Note - Table 2

Supplementary Note - Table 2 -- Information on genotyping methods, quality control of SNPs, imputation, and statistical analysis for stage 1 genome-wide association studies.

| Study            | Platform                                           | Genotyping                 |            |                               |             | SNPs that met QC criteria | Imputation software | Imputation                             |                         | SNPs in meta-analysis | combined | $\lambda_{GC}$ men | women | Analysis software |
|------------------|----------------------------------------------------|----------------------------|------------|-------------------------------|-------------|---------------------------|---------------------|----------------------------------------|-------------------------|-----------------------|----------|--------------------|-------|-------------------|
|                  |                                                    | Genotype calling algorithm | MAF        | Inclusion criteria Call rate* | p for HWE   |                           |                     | Inclusion criteria Imputation quality* | MAF                     |                       |          |                    |       |                   |
| ADVANCE Cases    | Illumina 550k                                      | Beadstudio                 | none       | $\geq 98.5\%$                 | $> 10^{-3}$ | 543985                    | BimBam              | none                                   | proper-info $\geq 0.40$ | 2198192               | --       | 1.041              | 1.046 | SNPtest           |
| ADVANCE Controls | Illumina 550k                                      | Beadstudio                 | none       | $\geq 98.5\%$                 | $> 10^{-3}$ | 543985                    | BimBam              | none                                   | proper-info $\geq 0.40$ | 2212041               | --       | 1.042              | 1.018 | SNPtest           |
| AGES             | Illumina                                           | BeadStudio                 | $\geq 1\%$ | $\geq 95\%$                   | $> 10^{-6}$ | 308,340                   | MACH                | none                                   | $r2\_hat \geq 0.30$     | 2458927               | --       | 1.029              | 1.037 | ProbABEL          |
| Amish            | Human370CNV Affymetrix GeneChip Human Mapping 500K | BRLMM                      | $\geq 1\%$ | $\geq 95\%$                   | $> 10^{-6}$ | 338,598                   | MACH                | none                                   | $r2\_hat \geq 0.30$     | 2291092               | 1.048    | --                 | --    | MMAF              |
| ARIC             | Affymetrix Genome-Wide Human SNP Array 6.0         | Birdseed                   | $\geq 1\%$ | $\geq 90\%$                   | $> 10^{-6}$ | 685,812                   | MACH v1.0.16        | none                                   | $r2\_hat \geq 0.30$     | 2511301               | --       | 1.013              | 1.03  | ProbABEL          |
| B58C (T1DGC)     | Illumina HumanHap 550 V.1                          | ILLUMINUS                  | $> 0\%$    | none                          | none        | 539,458                   | MACH                | none                                   | $r2\_hat \geq 0.30$     | 2507904               | --       | 1.007              | 1.01  | ProbABEL          |
| B58C (WTCCC)     | Affymetrix GeneChip Human Mapping 500K             | CHIAMO                     | $> 0\%$    | none                          | none        | 490,032                   | IMPUTE              | none                                   | proper-info $\geq 0.40$ | 2448867               | --       | 1.008              | 0.992 | SNPtest           |
| BRIGHT           | Affymetrix GeneChip Human Mapping 500K             | CHIAMO                     | $\geq 5\%$ | $\geq 95\%$                   | $> 10^{-6}$ | 387,666                   | IMPUTE              | none                                   | proper-info $\geq 0.40$ | 2429493               | --       | 1.007              | 1.017 | SNPtest           |
| CAD_WTCCC        | Affymetrix GeneChip Human Mapping 500K             | CHIAMO                     | $> 5\%$    | $\geq 95\%$                   | $> 10^{-6}$ | 387,667                   | IMPUTE              | none                                   | proper-info $\geq 0.40$ | 2430162               | --       | 1.004              | 1.025 | SNPTEST           |
| CAPS1 cases      | Affymetrix GeneChip Human Mapping 500K             | BRLMM                      | $\geq 1\%$ | $\geq 95\%$                   | $> 10^{-7}$ | 330,124                   | IMPUTE              | none                                   | proper-info $\geq 0.40$ | 2388288               | --       | 0.992              | N/A   | SNPtest           |
| CAPS1 controls   | Affymetrix GeneChip Human Mapping 500K             | BRLMM                      | $\geq 1\%$ | $\geq 95\%$                   | $> 10^{-7}$ | 330,124                   | IMPUTE              | none                                   | proper-info $\geq 0.40$ | 2391197               | --       | 1.001              | N/A   | SNPtest           |
| CAPS2 cases      | Affymetrix GeneChip Human Mapping 5.0K             | BLRMM-P                    | $\geq 1\%$ | $\geq 95\%$                   | $> 10^{-7}$ | 348,163                   | IMPUTE              | none                                   | proper-info $\geq 0.40$ | 2416628               | --       | 1.013              | N/A   | SNPtest           |
| CAPS2 controls   | Affymetrix GeneChip Human Mapping 5.0K             | BLRMM-P                    | $\geq 1\%$ | $\geq 95\%$                   | $> 10^{-7}$ | 348,163                   | IMPUTE              | none                                   | proper-info $\geq 0.40$ | 2392236               | --       | 1.013              | N/A   | SNPtest           |
| CHS              | Illumina 370-CNV                                   | BeadStudio                 | -.**       | $> 97\%$                      | $> 10^{-5}$ | 306,655                   | BimBam              | $> 1\%$                                | $r2\_hat \geq 0.30$     | 2191627               | --       | 1.017              | 1.018 | R                 |

Supplementary Note - Table 2

| Study              | Platform                                    | Genotyping                 |       |                               |                    | SNPs that met QC criteria | Imputation             |                     |                            | SNPs in meta-analysis | combined | $\lambda_{GC}$ men | women | Analysis software |
|--------------------|---------------------------------------------|----------------------------|-------|-------------------------------|--------------------|---------------------------|------------------------|---------------------|----------------------------|-----------------------|----------|--------------------|-------|-------------------|
|                    |                                             | Genotype calling algorithm | MAF   | Inclusion criteria Call rate* | p for HWE          |                           | Inclusion criteria MAF | Imputation quality* |                            |                       |          |                    |       |                   |
| CoLaus             | Affymetrix GeneChip Human Mapping 500K      | BRLMM                      | ≥ 1%  | ≥ 70%                         | > 10 <sup>-7</sup> | 390631                    | IMPUTE                 | none                | r <sup>2</sup> -hat ≥ 0.30 | 2479488               | --       | 0.997              | 1.009 | QUICKTEST         |
| deCODE             | Illumina HumanHap300 or HumanHapCNV370      | BeadStudio                 | ≥ 1%  | ≥ 96%                         | > 10 <sup>-6</sup> | 290,447                   | IMPUTE                 | none                | proper-info ≥ 0.40         | 2455981               | 0.993    | --                 | --    | SNPtest           |
| DGI (cases)        | Affymetrix 500K Array Set                   | BRLMM                      | > 5%  | ≥ 95%                         | > 10 <sup>-6</sup> | 347,010                   | MACH                   | ≥1%                 | r <sup>2</sup> -hat ≥ 0.30 | 2,375,087             | --       | 0.996              | 1.016 | MACH2QTL          |
| DGI (controls)     | Affymetrix 500K Array Set                   | BRLMM                      | > 5%  | ≥ 95%                         | > 10 <sup>-6</sup> | 347,010                   | MACH                   | ≥1%                 | r <sup>2</sup> -hat ≥ 0.30 | 2,375,087             | --       | 0.993              | 1.007 | MACH2QTL          |
| EGCUT              | Illumina Beadarray Human370CNV              | Beadstudio                 | ≥ 1%  | ≥ 98%                         | > 10 <sup>-6</sup> | 299,484                   | IMPUTE                 | none                | proper-info ≥ 0.40         | 2428764               | --       | 1.01               | 1.009 | SNPtest           |
| EPIC-Obesity Study | Affymetrix GeneChip Human Mapping 500K      | BRLMM                      | ≥ 1%  | ≥ 90%                         | > 10 <sup>-6</sup> | 397,438                   | IMPUTE                 | none                | proper-info ≥ 0.40         | 2415364               | --       | 1.009              | 1.008 | SNPtest           |
| ERF                | Illumina 318K, 370K, Affymetrix 250K        | Beadstudio, BRLMM          | >0.5% | > 95%                         | > 10 <sup>-6</sup> | NA                        | MACH                   | none                | r <sup>2</sup> -hat ≥ 0.30 | 2463910               | 1.022    | --                 | --    | ProbABEL          |
| Fenland            | Affymetrix SNP5.0                           | BRLMM                      | ≥ 1%  | ≥ 90%                         | > 10 <sup>-6</sup> | 362,055                   | IMPUTE                 | none                | proper-info ≥ 0.40         | 2473344               | --       | 1.021              | 1.011 | SNPtest           |
| FHS cases          | Illumina 1Million GeneChip                  | BeadStudio                 | ≥1%   | ≥ 98%                         | > 10 <sup>-6</sup> | 874,830                   | MACH                   | none                | r <sup>2</sup> -hat ≥ 0.30 | 2473344               | 1.043    | --                 | --    | SAS               |
| FHS controls       | Illumina 1Million GeneChip                  | BeadStudio                 | ≥1%   | ≥ 98%                         | > 10 <sup>-6</sup> | 874,830                   | MACH                   | none                | r <sup>2</sup> -hat ≥ 0.30 | 2470979               | 1.032    | --                 | --    | SAS               |
| FRAM               | Affymetrix 500K Affymetrix 50K supplemental | BRLMM                      | ≥ 1%  | ≥ 97%                         | > 10 <sup>-6</sup> | 378,163                   | MACH v1.0.15           | none                | r <sup>2</sup> -hat ≥ 0.30 | 2455455               | 1.076    | --                 | --    | R                 |
| FTC                | Illumina HumanHap 318K                      | BeadStudio                 | ≥ 1%  | ≥ 90%                         | > 10 <sup>-6</sup> | 304,582                   | MACH                   | none                | r <sup>2</sup> -hat ≥ 0.30 | 2298003               | --       | N/A                | 0.984 | ProbABEL          |
| FUSION cases       | Illumina Infinium™ II HumanHap300 BeadChip  | BeadStudio                 | > 1%  | ≥ 90%                         | ≥ 10 <sup>-6</sup> | 315,635                   | MACH                   | none                | r <sup>2</sup> -hat ≥ 0.30 | 2452583               | --       | 1.005              | 1.011 | MACH2QTL          |
| FUSION controls    | Illumina Infinium™ II HumanHap300 BeadChip  | BeadStudio                 | > 1%  | ≥ 90%                         | ≥ 10 <sup>-6</sup> | 315,635                   | MACH                   | none                | r <sup>2</sup> -hat ≥ 0.30 | 2451292               | --       | 0.998              | 1.012 | MACH2QTL          |
| GENMETS cases      | Illumina HumanHap 610K                      | Illuminus                  | ≥ 1%  | ≥ 95%                         | > 10 <sup>-6</sup> | 555,388                   | MACH                   | none                | r <sup>2</sup> -hat ≥ 0.30 | 2482250               | --       | 0.998              | 0.992 | ProbABEL          |
| GENMETS controls   | Illumina HumanHap 610K                      | Illuminus                  | ≥ 1%  | ≥ 95%                         | > 10 <sup>-6</sup> | 555,388                   | MACH                   | none                | r <sup>2</sup> -hat ≥ 0.30 | 2482703               | --       | 1.008              | 1.002 | ProbABEL          |

Supplementary Note - Table 2

| Study             | Platform                                       | Genotyping                       |            |                               |                     |         | SNPs that met QC criteria | Imputation          |                         |                                        | SNPs in meta-analysis | combined    | $\lambda_{GC}$ men | women               | Analysis software |
|-------------------|------------------------------------------------|----------------------------------|------------|-------------------------------|---------------------|---------|---------------------------|---------------------|-------------------------|----------------------------------------|-----------------------|-------------|--------------------|---------------------|-------------------|
|                   |                                                | Genotype calling algorithm       | MAF        | Inclusion criteria Call rate* | p for HWE           |         |                           | Imputation software | MAF                     | Inclusion criteria Imputation quality* |                       |             |                    |                     |                   |
| GerMIFSI          | Affymetrix NSP/STY                             | BRLMM                            | >1%        | >97%                          | $> 10^{-5}$         | 282,215 | MACH                      | none                | $r2\_hat \geq 0.30$     | 2333219                                | --                    | 0.99        | 1.014              | GenABEL             |                   |
| GerMiFSII         | Affymetrix 6.0                                 | birdseed                         | >1%        | >97%                          | $> 10^{-5}$         | 653,149 | MACH                      | none                | $r2\_hat \geq 0.30$     | 2492326                                | --                    | 1.01        | 1.016              | GenABEL             |                   |
| KORA3             | Affymetrix GeneChip Human Mapping 500K         | BRLMM                            | >5%        | none                          | none                | 380,507 | MACH1.0                   | none                | $r2\_hat \geq 0.30$     | 2415072                                | --                    | 1.005       | 0.997              | MACH2QTL            |                   |
| KORA4             | Affy 6.0                                       | Birdseed                         | none       | $\geq 93\%$                   | none                | 906,716 | MACH1.16                  | none                | $r2\_hat \geq 0.30$     | 2480938                                | --                    | 1.001       | 0.994              | MACH2QTL            |                   |
| MICROS            | ILLUMINA318K                                   | BeadStudio                       | $\geq 1\%$ | $\geq 98\%$                   | $> 10^{-6}$         | 318237  | MACH 1.0                  | none                | $r2\_hat \geq 0.30$     | 2435741                                | 0.992                 | --          | --                 | ProbABLE            |                   |
| Migen (cases)     | Affymetrix 6.0 Array                           | Birdseed                         | >0.01      | >0.95                         | $1 \times 10^{-6}$  | 618,475 | MACH(1.0.15)              | >0.01               | $r2\_hat \geq 0.30$     | 2271906                                | --                    | 1.009 (avg) | 1.017 (avg)        | MACH2QTL            |                   |
| Migen (controls)  | Affymetrix 6.0 Array                           | Birdseed                         | >0.01      | >0.95                         | $1 \times 10^{-6}$  | 618,475 | MACH(1.0.15)              | >0.01               | $r2\_hat \geq 0.30$     | 2302578                                | --                    | 1.002 (avg) | 1.014 (avg)        | MACH2QTL            |                   |
| NBS_WTCCC         | Affymetrix GeneChip Human Mapping 500K         | CHIAMO                           | >5%        | $\geq 95\%$                   | $> 10^{-6}$         | 387,667 | IMPUTE                    | none                | proper-info $\geq 0.40$ | 2415681                                | --                    | 1.021       | 1.01               | SNPTEST             |                   |
| NFBC-1966         | Illumina HumanCNV-370DUO Analysis BeadChip     | Standard Illumina BeadStudio     | $\geq 5\%$ | $\geq 95\%$                   | $> 10^{-4}$         | 328,007 | IMPUTE                    | none                | proper-info $\geq 0.40$ | 2458713                                | --                    | 1.016       | 1.018              | SNPTEST             |                   |
| NHS               | Illumina HumanHap550                           | Standard Illumina BeadStudio     | $\geq 1\%$ | $\geq 90\%$                   | none                | 510,073 | MACH                      | none                | $r2\_hat \geq 0.30$     | 2520492                                | --                    | N/A         | 0.992              | MACH2QTL            |                   |
| NSPHS             | ILLUMINA318K                                   | BeadStudio                       | $\geq 1\%$ | $\geq 98\%$                   | $> 10^{-6}$         | 318236  | MACH 1.0                  | none                | $r2\_hat \geq 0.30$     | 2385350                                | 1.007                 |             |                    | ProbABLE            |                   |
| NTRNESDA cases    | Perlegen - Affymetrix gene chip 600K           | Proprietary Perlegen             | >1%        | $\geq 95\%$                   | none                | 435,291 | IMPUTE                    | none                | proper-info $\geq 0.40$ | 2490078                                | --                    | 1.016       | 1.02               | SNPtest             |                   |
| NTRNESDA controls | Perlegen - Affymetrix gene chip 600K           | Proprietary Perlegen             | >1%        | $\geq 95\%$                   | none                | 435,291 | IMPUTE                    | none                | proper-info $\geq 0.40$ | 2488884                                | --                    | 1.021       | 1.016              | SNPtest             |                   |
| ORCADES           | ILLUMINA318K                                   | BeadStudio                       | $\geq 1\%$ | $\geq 98\%$                   | $> 10^{-6}$         | 318235  | MACH 1.0                  | none                | $r2\_hat \geq 0.30$     | 2434295                                | 1                     | --          | --                 | ProbABLE            |                   |
| PLCO              | Illumina HumanHap300 and Illumina HumanHap240  | BeadStudio                       | none       | $\geq 90\%$                   | none                | 523,231 | MACH                      | none                | $r2\_hat \geq 0.30$     | 2519768                                | --                    | 1.009       | NA                 | MACH2QTL            |                   |
| Procardis         | HumanHap300 BeadChips                          | Illumina Beadstudio 2.0 software | > 5%       | $\geq 95\%$                   | $>5 \times 10^{-7}$ | ~820k   | IMPUTE                    | none                | proper-info $\geq 0.40$ | 2581539                                | --                    | 1           | 1.02               | SNPTEST             |                   |
| RS-I              | Illumina / HumanHap 550 V.3                    | Beadstudio GeneCall              | $\geq 1\%$ | $\geq 97.5\%$                 | $> 10^{-6}$         | 512,349 | MACH                      | none                | $r2\_hat \geq 0.30$     | 2488215                                | --                    | 1.029       | 1.039              | MACH2QTL            |                   |
| RUNMC             | Illumina HumanHapCNV370                        | BeadStudio                       | $\geq 1\%$ | $\geq 96\%$                   | $> 10^{-6}$         | 312,199 | IMPUTE                    | none                | proper-info $\geq 0.40$ | 2466347                                | 0.999                 | --          | --                 | SNPtest             |                   |
| SardiNIA          | Affymetrix GeneChip Human Mapping 500K and 10K | BRLMM                            | $\geq 5\%$ | $\geq 90\%$                   | $> 10^{-6}$         | 356,359 | MACH                      | none                | $r2\_hat \geq 0.30$     | 2251689                                | 1.104                 | --          | --                 | Merlin -- fastassoc |                   |

Supplementary Note - Table 2

| Study           | Platform                               | Genotyping                             |            |                               |             | SNPs that met QC criteria | Imputation                        |      |                                        | SNPs in meta-analysis | combined | $\lambda_{GC}$ men | women | Analysis software                       |
|-----------------|----------------------------------------|----------------------------------------|------------|-------------------------------|-------------|---------------------------|-----------------------------------|------|----------------------------------------|-----------------------|----------|--------------------|-------|-----------------------------------------|
|                 |                                        | Genotype calling algorithm             | MAF        | Inclusion criteria Call rate* | p for HWE   |                           | Imputation software               | MAF  | Inclusion criteria Imputation quality* |                       |          |                    |       |                                         |
| SASBAC cases    | Illumina HumanHap300+240S              | Standard Illumina BeadStudio (GenCall) | $\geq 3\%$ | $\geq 90\%$                   | $> 10^{-7}$ | 510,578                   | IMPUTE                            | none | proper-info $\geq 0.40$                | 2491837               | --       | N/A                | 0.998 | SNPtest                                 |
| SASBAC controls | Illumina HumanHap550                   | Standard Illumina BeadStudio (GenCall) | $\geq 3\%$ | $\geq 90\%$                   | $> 10^{-7}$ | 512,223                   | IMPUTE                            | none | proper-info $\geq 0.40$                | 2474796               | --       | N/A                | 1.003 | SNPtest                                 |
| SEARCH/UKOPS    | Illumina HumanHap 610 Quad             | Illuminus                              | $\geq 1\%$ | $\geq 95\%$                   | $> 10^{-4}$ | 495,229                   | In-house method similar to IMPUTE | none | $r2\_hat \geq 0.30$                    | 2486401               | --       | N/A                | 1.018 | C++                                     |
| SHIP            | Affymetrix Human SNP Array 6.0         | Birdseed V2                            | $\geq 0\%$ | $\geq 0\%$                    | $\geq 0\%$  | 869,224                   | IMPUTE v0.5.0                     | none | proper-info $\geq 0.40$                | 2607463               | --       | 1.014              | 1.001 | SNPTEST v1.1.5<br>InforSense<br>SNPTEST |
| T2D_WTCCC       | Affymetrix GeneChip Human Mapping 500K | CHIAMO                                 | $> 5\%$    | $\geq 95\%$                   | $> 10^{-6}$ | 387,667                   | IMPUTE                            | none | proper-info $\geq 0.40$                | 2425154               | --       | 1.012              | 1.017 | SNPTEST                                 |
| TwinsUK         | Illumina / HumanHap 300 & 550          | Illuminus                              | $\geq 1\%$ | $\geq 95\%$                   | $> 10^{-6}$ | 295,702                   | IMPUTE                            | none | proper-info $\geq 0.40$                | 2460840               | --       | N/A                | 1.015 | SNPtest                                 |
| VIS             | ILLUMINA318K                           | BeadStudio                             | $\geq 1\%$ | $\geq 98\%$                   | $> 10^{-6}$ | 317465                    | MACH 1.0                          | none | $r2\_hat \geq 0.30$                    | 2423020               | 1.001    | --                 | --    | ProbABLE                                |

\*SNPtest calculates the 'proper\_info' statistic as a measure of the relative statistical information about the additive genetic effect being estimated. The proper\_info statistic has a direct relationship to the power of the test and ranges from 0 to 1, with 1 indicating perfect information. MACH calculates the 'rsq\_hat', which is the  $r^2$  between each imputed genotype and its true underlying genotype. Rsq\_hat ranges from 0 to 1, with 1 indicating perfect imputation

## Supplementary Note

**Supplementary Note - Table 3** Study-specific descriptive statistics genome-wide association studies of stage 1.

Supplementary Note - Table 3

Supplementary Note - Table 3 -- Study-specific descriptive statistics genome-wide association studies of stage 1.

| Study            | Trait                    | Men  |       |       |        |       |        | Women |       |       |        |       |        |
|------------------|--------------------------|------|-------|-------|--------|-------|--------|-------|-------|-------|--------|-------|--------|
|                  |                          | n    | mean  | SD    | median | min   | max    | n     | mean  | SD    | median | min   | max    |
| ADVANCE Cases    | Age (yrs)                | 114  | 40.42 | 3.98  | 41.20  | 20.40 | 45.10  | 161   | 49.46 | 4.68  | 50.50  | 34.00 | 55.00  |
|                  | BMI (kg/m <sup>2</sup> ) | 114  | 31.39 | 5.77  | 30.89  | 19.48 | 54.32  | 161   | 31.40 | 8.17  | 30.65  | 17.30 | 61.08  |
|                  | Weight (kg)              | 114  | 99.03 | 21.16 | 97.59  | 64.05 | 181.44 | 161   | 83.98 | 21.78 | 81.74  | 48.58 | 153.00 |
|                  | Height (m)               | 114  | 1.77  | 0.07  | 1.77   | 1.61  | 1.95   | 161   | 1.64  | 0.07  | 1.64   | 1.48  | 1.84   |
| ADVANCE Controls | Age (yrs)                | 128  | 40.46 | 3.23  | 41.20  | 33.40 | 46.80  | 183   | 48.69 | 4.45  | 49.80  | 34.80 | 55.40  |
|                  | BMI (kg/m <sup>2</sup> ) | 128  | 27.00 | 4.48  | 26.21  | 17.86 | 49.38  | 181   | 26.08 | 6.36  | 24.65  | 15.76 | 54.12  |
|                  | Weight (kg)              | 128  | 86.45 | 16.38 | 84.37  | 51.48 | 158.76 | 182   | 71.35 | 17.13 | 68.27  | 40.23 | 140.71 |
|                  | Height (m)               | 128  | 1.79  | 0.07  | 1.78   | 1.58  | 1.96   | 181   | 1.66  | 0.06  | 1.66   | 1.45  | 1.80   |
| AGES Midlife     | Age (yrs)                | 1352 | 49.69 | 5.87  | 50.00  | 34.00 | 75.00  | 1867  | 52.00 | 6.54  | 52.00  | 34.00 | 77.00  |
|                  | BMI (kg/m <sup>2</sup> ) | 1351 | 25.62 | 3.09  | 25.48  | 16.94 | 38.61  | 1856  | 24.89 | 3.81  | 24.31  | 13.65 | 50.41  |
|                  | Weight (kg)              | 1351 | 81.32 | 11.41 | 80.40  | 51.00 | 139.00 | 1856  | 67.13 | 10.51 | 66.00  | 32.80 | 140.60 |
|                  | Height (m)               | 1352 | 1.78  | 0.06  | 1.78   | 1.56  | 1.98   | 1867  | 1.64  | 0.05  | 1.64   | 1.45  | 1.83   |
| Amish            | Age (yrs)                | 468  | 45.90 | 16.60 | 43.00  | 20.00 | 98.00  | 437   | 47.50 | 15.10 | 48.00  | 20.00 | 95.00  |
|                  | BMI (kg/m <sup>2</sup> ) | 468  | 26.30 | 3.50  | 26.00  | 18.60 | 39.00  | 437   | 28.50 | 5.70  | 28.30  | 16.90 | 47.10  |
|                  | Weight (kg)              | 468  | 78.60 | 11.70 | 77.00  | 49.40 | 112.80 | 437   | 73.50 | 14.40 | 71.90  | 37.80 | 114.30 |
|                  | Height (m)               | 468  | 1.73  | 0.07  | 1.73   | 1.48  | 1.93   | 437   | 1.61  | 0.06  | 1.61   | 1.39  | 1.75   |
| ARIC             | Age (yrs)                | 3822 | 54.69 | 5.70  | 55.00  | 44.00 | 66.00  | 4286  | 53.97 | 5.67  | 54.00  | 44.00 | 66.00  |
|                  | BMI (kg/m <sup>2</sup> ) | 3822 | 27.48 | 4.01  | 26.97  | 17.21 | 56.26  | 4286  | 26.63 | 5.52  | 25.45  | 14.38 | 55.20  |
|                  | Weight (kg)              | 3822 | 85.54 | 13.76 | 84.10  | 44.55 | 182.27 | 4286  | 70.00 | 14.99 | 66.80  | 36.36 | 141.82 |
|                  | Height (m)               | 3822 | 1.76  | 0.06  | 1.76   | 1.49  | 1.99   | 4286  | 1.62  | 0.06  | 1.62   | 1.37  | 1.87   |
| B58C-T1DGC       | Age (yrs)                | 1259 | 45.31 | 0.34  | 45.33  | 44.50 | 46.00  | 1328  | 45.27 | 0.34  | 45.25  | 44.50 | 46.00  |
|                  | BMI (kg/m <sup>2</sup> ) | 1259 | 28.02 | 4.19  | 27.56  | 16.84 | 51.63  | 1328  | 26.97 | 5.58  | 25.73  | 17.18 | 52.20  |
|                  | Weight (kg)              | 1259 | 87.05 | 14.41 | 86.00  | 50.80 | 177.10 | 1328  | 71.63 | 15.45 | 68.40  | 43.00 | 155.30 |
|                  | Height (m)               | 1261 | 1.76  | 0.07  | 1.76   | 1.55  | 1.99   | 1330  | 1.63  | 0.06  | 1.63   | 1.40  | 1.85   |
| B58C-WTCCC       | Age (yrs)                | 741  | 44.89 | 0.34  | 44.75  | 44.50 | 45.60  | 738   | 44.89 | 0.35  | 44.75  | 44.50 | 45.60  |
|                  | BMI (kg/m <sup>2</sup> ) | 741  | 27.84 | 4.29  | 27.23  | 15.93 | 48.41  | 738   | 26.92 | 5.44  | 25.56  | 17.34 | 56.55  |
|                  | Weight (kg)              | 741  | 86.56 | 14.63 | 85.20  | 51.00 | 137.50 | 738   | 70.96 | 14.68 | 68.20  | 41.80 | 139.40 |
|                  | Height (m)               | 741  | 1.76  | 0.07  | 1.76   | 1.52  | 2.02   | 738   | 1.62  | 0.06  | 1.63   | 1.42  | 1.80   |
| BRIGHT           | Age (yrs)                | 719  | 56.29 | 11.15 | 57.00  | 21.00 | 84.00  | 1087  | 57.43 | 11.23 | 58.00  | 21.00 | 85.00  |
|                  | BMI (kg/m <sup>2</sup> ) | 719  | 27.74 | 3.28  | 27.68  | 17.20 | 38.26  | 1087  | 27.36 | 4.04  | 27.03  | 16.85 | 41.66  |
|                  | Weight (kg)              | 719  | 84.22 | 11.90 | 83.45  | 51.00 | 121.00 | 1087  | 71.19 | 11.55 | 69.90  | 41.70 | 122.80 |
|                  | Height (m)               | 719  | 1.74  | 0.07  | 1.74   | 1.51  | 1.95   | 1087  | 1.61  | 0.06  | 1.61   | 1.39  | 1.81   |
| CAD_WTCCC        | Age (yrs)                | 1489 | 59.97 | 7.98  | 61.00  | 35.00 | 82.00  | 387   | 60.30 | 8.47  | 61.00  | 36.00 | 81.00  |
|                  | BMI (kg/m <sup>2</sup> ) | 1489 | 27.55 | 3.91  | 27.13  | 16.53 | 53.40  | 387   | 27.84 | 5.23  | 27.18  | 12.81 | 51.73  |
|                  | Weight (kg)              | 1489 | 83.25 | 13.07 | 82.50  | 37.70 | 173.00 | 387   | 71.04 | 14.13 | 69.20  | 29.20 | 149.50 |
|                  | Height (m)               | 1489 | 1.74  | 0.07  | 1.74   | 1.40  | 1.98   | 387   | 1.60  | 0.07  | 1.58   | 1.42  | 1.78   |
| CAPS1 cases      | Age (yrs)                | 505  | 68.15 | 7.38  | 67.90  | 49.50 | 81.10  |       |       |       |        |       |        |
|                  | BMI (kg/m <sup>2</sup> ) | 484  | 26.42 | 3.48  | 26.01  | 18.36 | 41.77  |       |       |       |        |       |        |
|                  | Weight (kg)              | 485  | 82.50 | 12.26 | 82.00  | 47.00 | 135.00 |       |       |       |        |       |        |
|                  | Height (m)               | 489  | 1.77  | 0.07  | 1.77   | 1.58  | 1.97   |       |       |       |        |       |        |
| CAPS1 controls   | Age (yrs)                | 506  | 66.36 | 7.50  | 65.90  | 44.90 | 79.80  |       |       |       |        |       |        |
|                  | BMI (kg/m <sup>2</sup> ) | 483  | 26.49 | 3.58  | 26.25  | 16.60 | 58.36  |       |       |       |        |       |        |
|                  | Weight (kg)              | 485  | 82.75 | 13.10 | 82.00  | 53.00 | 187.00 |       |       |       |        |       |        |
|                  | Height (m)               | 491  | 1.77  | 0.07  | 1.76   | 1.58  | 2.01   |       |       |       |        |       |        |
| CAPS2 cases      | Age (yrs)                | 1483 | 66.13 | 7.07  | 65.40  | 44.90 | 82.20  |       |       |       |        |       |        |
|                  | BMI (kg/m <sup>2</sup> ) | 1423 | 26.34 | 3.37  | 25.95  | 15.74 | 55.24  |       |       |       |        |       |        |
|                  | Weight (kg)              | 1424 | 82.53 | 12.24 | 82.00  | 47.00 | 185.00 |       |       |       |        |       |        |
|                  | Height (m)               | 1452 | 1.77  | 0.06  | 1.77   | 1.54  | 2.00   |       |       |       |        |       |        |
| CAPS2 controls   | Age (yrs)                | 519  | 67.24 | 7.35  | 66.90  | 49.10 | 80.10  |       |       |       |        |       |        |
|                  | BMI (kg/m <sup>2</sup> ) | 500  | 26.03 | 3.32  | 25.75  | 17.56 | 45.20  |       |       |       |        |       |        |
|                  | Weight (kg)              | 504  | 80.80 | 11.38 | 80.00  | 55.00 | 140.00 |       |       |       |        |       |        |
|                  | Height (m)               | 511  | 1.76  | 0.06  | 1.76   | 1.59  | 1.98   |       |       |       |        |       |        |
| CHS              | Age (yrs)                | 1281 | 73.00 | 5.66  | 72.00  | 65.00 | 95.00  | 1957  | 71.90 | 5.15  | 71.00  | 65.00 | 98.00  |
|                  | BMI (kg/m <sup>2</sup> ) | 1276 | 26.40 | 3.50  | 26.10  | 18.60 | 44.20  | 1952  | 26.40 | 4.78  | 25.80  | 18.50 | 48.30  |
|                  | Weight (kg)              | 1276 | 79.70 | 11.90 | 79.00  | 50.00 | 145.00 | 1952  | 67.10 | 12.90 | 65.50  | 37.30 | 133.20 |
|                  | Height (m)               | 1277 | 1.73  | 0.07  | 1.73   | 1.51  | 1.92   | 1955  | 1.59  | 0.06  | 1.59   | 1.24  | 1.78   |
| CoLaus           | Age (yrs)                | 2547 | 52.92 | 10.77 | 52.20  | 34.90 | 75.10  | 2862  | 53.88 | 10.72 | 53.70  | 35.00 | 75.40  |
|                  | BMI (kg/m <sup>2</sup> ) | 2547 | 26.64 | 4.19  | 26.20  | 11.70 | 81.10  | 2861  | 25.15 | 4.91  | 24.20  | 8.10  | 59.20  |
|                  | Weight (kg)              | 2547 | 81.54 | 13.41 | 79.90  | 36.50 | 175.40 | 2861  | 66.43 | 12.98 | 64.00  | 21.40 | 171.00 |
|                  | Height (m)               | 2547 | 1.75  | 0.07  | 1.75   | 1.33  | 1.98   | 2862  | 1.62  | 0.07  | 1.63   | 1.31  | 1.85   |
| deCODE*          | Age (yrs)                | 9213 | 64.74 | 15.93 | 78.00  | 18.00 | 103.00 | 17586 | 57.94 | 18.46 | 43.00  | 11.50 | 108.00 |
|                  | BMI (kg/m <sup>2</sup> ) | 9213 | 27.71 | 4.70  | 45.99  | 14.52 | 72.14  | 17586 | 26.83 | 5.49  | 18.56  | 13.67 | 73.51  |
|                  | Weight (kg)              | 9213 | 87.89 | 16.57 | 149.00 | 40.00 | 216.00 | 17586 | 73.49 | 15.77 | 53.00  | 33.00 | 220.00 |
|                  | Height (m)               | 9213 | 1.78  | 0.07  | 1.80   | 1.30  | 2.07   | 17586 | 1.65  | 0.06  | 1.69   | 1.34  | 1.99   |
| DGI (cases)      | Age (yrs)                | 688  | 63.42 | 9.91  | 64.37  | 37.10 | 84.96  | 629   | 65.20 | 10.12 | 66.31  | 36.79 | 84.97  |
|                  | BMI (kg/m <sup>2</sup> ) | 688  | 28.09 | 3.83  | 27.99  | 18.05 | 46.71  | 629   | 28.62 | 4.80  | 28.16  | 18.51 | 53.73  |
|                  | Weight (kg)              | 688  | 85.64 | 13.26 | 84.50  | 53.40 | 148.00 | 629   | 74.47 | 13.31 | 73.30  | 43.80 | 141.00 |
|                  | Height (m)               | 688  | 1.75  | 0.06  | 1.74   | 1.43  | 1.96   | 629   | 1.61  | 0.06  | 1.61   | 1.41  | 1.80   |

Supplementary Note - Table 3

| Study              | Trait                    | Men  |       |       |        |       |        | Women |       |       |        |       |        |
|--------------------|--------------------------|------|-------|-------|--------|-------|--------|-------|-------|-------|--------|-------|--------|
|                    |                          | n    | mean  | SD    | median | min   | max    | n     | mean  | SD    | median | min   | max    |
| DGI (controls)     | Age (yrs)                | 553  | 58.08 | 9.74  | 58.22  | 35.54 | 79.71  | 535   | 58.40 | 9.40  | 58.70  | 35.16 | 80.56  |
|                    | BMI (kg/m <sup>2</sup> ) | 553  | 26.76 | 3.22  | 26.53  | 16.95 | 43.89  | 535   | 26.76 | 4.11  | 26.17  | 17.96 | 42.77  |
|                    | Weight (kg)              | 553  | 82.92 | 11.47 | 82.00  | 57.40 | 143.00 | 535   | 71.02 | 11.76 | 70.00  | 46.80 | 124.00 |
|                    | Height (m)               | 553  | 1.76  | 0.06  | 1.76   | 1.59  | 2.00   | 535   | 1.63  | 0.06  | 1.63   | 1.42  | 1.87   |
| EGCUT              | Age (yrs)                | 697  | 40.62 | 16.78 | 38.00  | 18.00 | 90.00  | 720   | 42.88 | 15.93 | 42.00  | 18.00 | 92.00  |
|                    | BMI (kg/m <sup>2</sup> ) | 697  | 26.05 | 4.61  | 25.39  | 15.82 | 54.00  | 720   | 26.25 | 6.02  | 25.08  | 15.90 | 58.40  |
|                    | Weight (kg)              | 697  | 83.32 | 15.27 | 82.00  | 49.00 | 191.00 | 720   | 71.41 | 16.36 | 68.00  | 39.00 | 160.00 |
|                    | Height (m)               | 697  | 1.79  | 0.07  | 1.79   | 1.58  | 2.03   | 720   | 1.65  | 0.06  | 1.65   | 1.45  | 1.84   |
| EPIC-Obesity Study | Age (yrs)                | 1131 | 59.82 | 9.02  | 60.00  | 40.00 | 77.00  | 1284  | 58.74 | 9.00  | 59.00  | 39.00 | 77.00  |
|                    | BMI (kg/m <sup>2</sup> ) | 1131 | 26.62 | 3.21  | 26.22  | 16.85 | 42.06  | 1284  | 26.19 | 4.39  | 25.50  | 16.09 | 47.57  |
|                    | Weight (kg)              | 1131 | 80.43 | 11.09 | 79.40  | 42.80 | 134.00 | 1284  | 67.98 | 11.62 | 66.20  | 44.60 | 119.00 |
|                    | Height (m)               | 1131 | 1.73  | 0.07  | 1.73   | 1.51  | 1.96   | 1284  | 1.61  | 0.06  | 1.60   | 1.37  | 1.82   |
| ERF                | Age (yrs)                | 890  | 50.14 | 14.98 | 50.67  | 18.00 | 88.60  | 1170  | 49.30 | 15.34 | 49.52  | 18.03 | 92.10  |
|                    | BMI (kg/m <sup>2</sup> ) | 890  | 27.14 | 3.98  | 26.78  | 15.85 | 42.44  | 1170  | 26.36 | 4.77  | 25.64  | 15.54 | 45.37  |
|                    | Weight (kg)              | 890  | 82.70 | 13.52 | 81.40  | 48.00 | 133.30 | 1170  | 68.96 | 13.14 | 67.00  | 42.10 | 133.90 |
|                    | Height (m)               | 890  | 1.75  | 0.07  | 1.75   | 1.52  | 1.96   | 1170  | 1.61  | 0.07  | 1.62   | 1.41  | 1.83   |
| Fenland            | Age (yrs)                | 615  | 44.48 | 7.32  | 45.00  | 30.00 | 57.00  | 787   | 45.34 | 7.18  | 46.00  | 30.00 | 57.00  |
|                    | BMI (kg/m <sup>2</sup> ) | 615  | 27.62 | 4.07  | 27.27  | 18.62 | 56.66  | 787   | 26.68 | 5.46  | 25.44  | 17.27 | 55.39  |
|                    | Weight (kg)              | 615  | 86.76 | 13.87 | 85.50  | 49.40 | 155.70 | 787   | 71.48 | 15.25 | 68.30  | 42.40 | 142.50 |
|                    | Height (m)               | 615  | 1.77  | 0.07  | 1.77   | 1.59  | 2.01   | 787   | 1.64  | 0.06  | 1.64   | 1.43  | 1.90   |
| FHS cases          | Age (yrs)                | 220  | 54.20 | 11.87 | 55.75  | 26.38 | 74.14  | 243   | 57.43 | 10.08 | 58.42  | 26.48 | 84.00  |
|                    | BMI (kg/m <sup>2</sup> ) | 208  | 28.51 | 4.68  | 28.15  | 15.96 | 45.72  | 233   | 28.27 | 6.51  | 26.75  | 18.43 | 50.18  |
|                    | Weight (kg)              | 208  | 89.04 | 15.03 | 87.77  | 51.71 | 146.51 | 233   | 73.87 | 17.94 | 69.40  | 45.36 | 1.00   |
|                    | Height (m)               | 208  | 1.77  | 0.07  | 1.77   | 1.58  | 1.96   | 233   | 1.62  | 0.06  | 1.62   | 1.42  | 1.79   |
| FHS controls       | Age (yrs)                | 218  | 52.09 | 12.20 | 54.19  | 26.99 | 76.86  | 216   | 58.25 | 8.57  | 59.10  | 27.33 | 81.09  |
|                    | BMI (kg/m <sup>2</sup> ) | 208  | 27.74 | 3.59  | 27.10  | 19.56 | 42.51  | 207   | 26.64 | 4.66  | 25.61  | 17.48 | 43.39  |
|                    | Weight (kg)              | 208  | 87.22 | 13.09 | 84.80  | 57.61 | 131.09 | 207   | 70.34 | 13.59 | 67.59  | 43.09 | 122.05 |
|                    | Height (m)               | 208  | 1.77  | 0.07  | 1.78   | 1.55  | 1.98   | 207   | 1.62  | 0.06  | 1.63   | 1.46  | 1.81   |
| FRAM               | Age (yrs)                | 3706 | 38.72 | 8.73  | 38.00  | 21.00 | 72.00  | 4388  | 38.22 | 8.64  | 38.00  | 21.00 | 70.00  |
|                    | BMI (kg/m <sup>2</sup> ) | 3706 | 27.08 | 4.18  | 26.61  | 16.91 | 56.54  | 4388  | 24.89 | 5.26  | 23.58  | 14.96 | 60.58  |
|                    | Weight (kg)              | 3706 | 84.41 | 14.45 | 82.56  | 30.39 | 177.36 | 4388  | 65.85 | 14.64 | 62.60  | 38.10 | 170.10 |
|                    | Height (m)               | 3706 | 1.76  | 0.07  | 1.77   | 1.23  | 2.00   | 4388  | 1.63  | 0.06  | 1.63   | 1.33  | 1.85   |
| FTC                | Age (yrs)                |      |       |       |        |       |        | 125   | 63.78 | 11.68 | 66.38  | 26.52 | 75.94  |
|                    | BMI (kg/m <sup>2</sup> ) |      |       |       |        |       |        | 125   | 25.07 | 3.41  | 24.65  | 18.69 | 35.04  |
|                    | Weight (kg)              |      |       |       |        |       |        | 125   | 65.25 | 9.20  | 64.00  | 46.50 | 93.00  |
|                    | Height (m)               |      |       |       |        |       |        | 125   | 1.61  | 0.06  | 1.61   | 1.46  | 1.77   |
| FUSION cases       | Age (yrs)                | 623  | 62.06 | 7.33  | 62.41  | 40.77 | 77.81  | 469   | 63.66 | 7.75  | 64.01  | 45.00 | 83.19  |
|                    | BMI (kg/m <sup>2</sup> ) | 623  | 29.44 | 4.02  | 29.14  | 18.19 | 43.14  | 469   | 31.20 | 5.25  | 30.71  | 16.00 | 47.59  |
|                    | Weight (kg)              | 623  | 88.43 | 13.58 | 88.00  | 50.90 | 144.00 | 469   | 79.51 | 14.70 | 76.90  | 35.00 | 125.50 |
|                    | Height (m)               | 617  | 1.73  | 0.06  | 1.73   | 1.52  | 1.97   | 465   | 1.60  | 0.06  | 1.59   | 1.40  | 1.76   |
| FUSION controls    | Age (yrs)                | 572  | 63.41 | 7.62  | 64.00  | 46.00 | 90.91  | 599   | 63.71 | 7.27  | 64.75  | 42.60 | 89.15  |
|                    | BMI (kg/m <sup>2</sup> ) | 572  | 27.02 | 3.53  | 26.78  | 19.22 | 51.07  | 599   | 27.24 | 4.15  | 26.80  | 17.50 | 45.90  |
|                    | Weight (kg)              | 572  | 81.40 | 11.98 | 80.65  | 52.10 | 151.10 | 599   | 69.99 | 11.44 | 68.80  | 45.70 | 127.10 |
|                    | Height (m)               | 569  | 1.74  | 0.06  | 1.74   | 1.56  | 1.91   | 598   | 1.60  | 0.06  | 1.60   | 1.44  | 1.79   |
| GENMETS cases      | Age (yrs)                | 425  | 49.19 | 10.42 | 49.00  | 30.00 | 75.00  | 432   | 52.36 | 11.71 | 51.00  | 30.00 | 75.00  |
|                    | BMI (kg/m <sup>2</sup> ) | 425  | 29.45 | 3.61  | 28.86  | 23.19 | 47.07  | 432   | 29.70 | 4.94  | 28.76  | 20.58 | 45.78  |
|                    | Weight (kg)              | 410  | 91.16 | 12.56 | 89.00  | 65.00 | 151.00 | 414   | 76.60 | 13.40 | 75.00  | 49.00 | 123.00 |
|                    | Height (m)               | 410  | 1.76  | 0.07  | 1.75   | 1.57  | 1.97   | 414   | 1.61  | 0.07  | 1.61   | 1.34  | 1.81   |
| GENMETS controls   | Age (yrs)                | 401  | 48.91 | 10.15 | 49.00  | 30.00 | 74.00  | 423   | 48.59 | 10.17 | 49.00  | 30.00 | 74.00  |
|                    | BMI (kg/m <sup>2</sup> ) | 401  | 25.41 | 3.08  | 24.94  | 17.09 | 39.04  | 423   | 25.35 | 3.15  | 24.92  | 17.09 | 39.04  |
|                    | Weight (kg)              | 401  | 78.03 | 10.33 | 77.00  | 54.00 | 116.00 | 422   | 77.62 | 10.60 | 77.00  | 51.00 | 113.00 |
|                    | Height (m)               | 401  | 1.75  | 0.07  | 1.75   | 1.54  | 1.96   | 422   | 1.75  | 0.07  | 1.75   | 1.54  | 1.96   |
| GerMiFSI           | Age (yrs)                | 394  | 57.27 | 8.57  | 59.00  | 32.00 | 82.00  | 206   | 60.39 | 8.67  | 61.00  | 36.00 | 82.00  |
|                    | BMI (kg/m <sup>2</sup> ) | 394  | 27.36 | 3.30  | 26.83  | 18.42 | 46.24  | 206   | 27.17 | 4.17  | 26.91  | 19.05 | 40.75  |
|                    | Weight (kg)              | 394  | 83.92 | 11.67 | 83.00  | 60.00 | 140.00 | 206   | 72.29 | 12.24 | 71.00  | 48.00 | 115.00 |
|                    | Height (cm)              | 394  | 1.75  | 0.06  | 1.75   | 1.59  | 1.97   | 206   | 1.63  | 0.06  | 1.63   | 1.44  | 1.79   |
| GerMiFSII          | Age (yrs)                | 901  | 60.14 | 12.17 | 59.00  | 29.00 | 88.00  | 223   | 62.80 | 12.76 | 61.00  | 34.00 | 90.00  |
|                    | BMI (kg/m <sup>2</sup> ) | 901  | 27.82 | 3.54  | 27.41  | 18.44 | 54.08  | 223   | 28.06 | 4.76  | 27.69  | 16.90 | 46.30  |
|                    | Weight (kg)              | 901  | 83.00 | 12.49 | 83.00  | 50.20 | 160.00 | 223   | 73.55 | 12.62 | 72.10  | 47.00 | 130.00 |
|                    | Height (cm)              | 901  | 1.74  | 0.07  | 1.73   | 1.52  | 2.00   | 223   | 1.62  | 0.06  | 1.61   | 1.49  | 1.79   |
| KORA3              | Age (yrs)                | 813  | 52.96 | 10.09 | 54.00  | 25.00 | 69.00  | 831   | 52.09 | 10.08 | 53.00  | 25.00 | 69.00  |
|                    | BMI (kg/m <sup>2</sup> ) | 813  | 27.69 | 3.45  | 27.29  | 18.73 | 40.67  | 829   | 26.98 | 4.64  | 26.40  | 16.71 | 45.43  |
|                    | Weight (kg)              | 813  | 83.58 | 11.46 | 83.30  | 59.00 | 132.50 | 829   | 69.87 | 11.88 | 68.30  | 42.50 | 121.80 |
|                    | Height (m)               | 813  | 1.74  | 0.07  | 1.74   | 1.51  | 1.96   | 830   | 1.61  | 0.06  | 1.61   | 1.44  | 1.80   |
| KORA4              | Age (yrs)                | 884  | 54.22 | 8.92  | 54.00  | 28.00 | 72.00  | 930   | 53.62 | 8.80  | 53.00  | 25.00 | 74.00  |
|                    | BMI (kg/m <sup>2</sup> ) | 883  | 27.99 | 3.91  | 27.59  | 18.31 | 55.11  | 928   | 27.49 | 5.07  | 26.78  | 18.21 | 51.22  |
|                    | Weight (kg)              | 883  | 85.13 | 12.93 | 84.00  | 54.20 | 192.70 | 929   | 71.46 | 13.30 | 69.60  | 43.90 | 142.00 |
|                    | Height (m)               | 883  | 1.74  | 0.07  | 1.74   | 1.56  | 1.94   | 928   | 1.61  | 0.06  | 1.61   | 1.43  | 1.82   |
| MICROS             | Age (yrs)                | 475  | 45.09 | 15.67 | 41.97  | 18.19 | 87.85  | 622   | 45.38 | 16.41 | 42.55  | 18.00 | 83.88  |
|                    | BMI (kg/m <sup>2</sup> ) | 475  | 26.07 | 3.96  | 25.62  | 18.13 | 42.75  | 622   | 25.28 | 5.32  | 24.27  | 14.03 | 71.26  |
|                    | Weight (kg)              | 468  | 78.38 | 13.32 | 76.90  | 47.00 | 127.50 | 612   | 65.16 | 13.19 | 63.00  | 36.60 | 169.00 |



Supplementary Note - Table 3

| Study             | Trait                    | Men  |        |       |        |        |        | Women |        |       |        |        |        |
|-------------------|--------------------------|------|--------|-------|--------|--------|--------|-------|--------|-------|--------|--------|--------|
|                   |                          | n    | mean   | SD    | median | min    | max    | n     | mean   | SD    | median | min    | max    |
| Migen (cases)     | Height (m)               | 467  | 1.73   | 0.07  | 1.73   | 1.53   | 1.95   | 612   | 1.61   | 0.07  | 1.61   | 1.40   | 1.79   |
|                   | Age (yrs)                | 800  | 44.53  | 4.77  | 45.97  | 19.38  | 51.00  | 474   | 49.66  | 7.28  | 51.22  | 23.00  | 61.00  |
|                   | BMI (kg/m <sup>2</sup> ) | 775  | 28.79  | 4.99  | 28.27  | 3.25   | 54.30  | 470   | 28.97  | 7.42  | 27.40  | 3.37   | 74.72  |
|                   | Weight (kg)              | 779  | 88.72  | 17.91 | 86.18  | 52.16  | 181.60 | 470   | 77.01  | 21.43 | 72.57  | 43.09  | 205.02 |
| Migen (controls)  | Height (m)               | 782  | 177.02 | 26.13 | 175.26 | 153.70 | 525.78 | 474   | 164.91 | 29.76 | 162.56 | 110.00 | 525.78 |
|                   | Age (yrs)                | 846  | 46.23  | 8.41  | 45.51  | 20.75  | 92.00  | 561   | 49.22  | 7.50  | 50.93  | 18.71  | 61.00  |
|                   | BMI (kg/m <sup>2</sup> ) | 844  | 27.12  | 4.08  | 26.74  | 17.99  | 50.21  | 558   | 27.07  | 6.65  | 25.70  | 17.99  | 78.41  |
|                   | Weight (kg)              | 844  | 84.52  | 14.39 | 82.20  | 52.00  | 158.00 | 558   | 72.28  | 17.87 | 68.04  | 44.00  | 203.00 |
| NBS_WTCCC*        | Height (m)               | 844  | 176.42 | 7.48  | 176.20 | 153.00 | 208.28 | 559   | 163.52 | 6.71  | 163.00 | 136.00 | 184.00 |
|                   | Age (yrs)                | 694  | 45.46  | 11.75 | 47.00  | 17.00  | 69.00  | 743   | 41.44  | 12.59 | 42.00  | 17.00  | 69.00  |
|                   | BMI (kg/m <sup>2</sup> ) | 694  | 26.76  | 4.12  | 26.30  | 18.13  | 53.19  | 743   | 25.75  | 4.46  | 24.86  | 18.08  | 47.22  |
|                   | Weight (kg)              | 694  | 85.03  | 14.35 | 82.73  | 54.09  | 173.00 | 743   | 69.74  | 12.21 | 66.82  | 50.00  | 127.27 |
| NFBC-1966         | Height (m)               | 694  | 1.78   | 0.07  | 1.77   | 1.50   | 2.00   | 743   | 1.65   | 0.07  | 1.65   | 1.48   | 1.82   |
|                   | Age (yrs)                | 2250 | 31.00  | 0.00  | 31.00  | 31.00  | 31.00  | 2247  | 31.00  | 0.00  | 31.00  | 31.00  | 31.00  |
|                   | BMI (kg/m <sup>2</sup> ) | 2250 | 25.18  | 3.62  | 24.86  | 15.32  | 47.58  | 2247  | 24.16  | 4.68  | 23.13  | 15.43  | 54.35  |
|                   | Weight (kg)              | 2250 | 80.15  | 12.72 | 78.70  | 49.40  | 150.40 | 2247  | 65.52  | 13.24 | 63.00  | 29.20  | 165.40 |
| NHS               | Height (m)               | 2250 | 1.78   | 0.06  | 1.78   | 1.52   | 2.02   | 2247  | 1.65   | 0.06  | 1.64   | 1.05   | 1.86   |
|                   | Age (yrs)                |      |        |       |        |        |        | 2265  | 54.46  | 6.45  | 55.00  | 39.00  | 66.00  |
|                   | BMI (kg/m <sup>2</sup> ) |      |        |       |        |        |        | 2265  | 25.13  | 4.53  | 24.13  | 16.40  | 53.14  |
|                   | Weight (kg)              |      |        |       |        |        |        | 2265  | 149.16 | 27.78 | 144.00 | 84.00  | 310.00 |
| NSPHS*            | Height (m)               |      |        |       |        |        |        | 2265  | 1.64   | 0.06  | 1.63   | 1.45   | 1.98   |
|                   | Age (yrs)                | 309  | 47.56  | 20.83 | 48.00  | 15.00  | 87.00  | 347   | 46.47  | 20.60 | 45.00  | 14.00  | 91.00  |
|                   | BMI (kg/m <sup>2</sup> ) | 307  | 26.75  | 4.54  | 26.23  | 17.78  | 46.49  | 340   | 25.97  | 5.07  | 24.98  | 16.44  | 46.68  |
|                   | Weight (kg)              | 307  | 78.42  | 14.66 | 77.00  | 51.00  | 138.00 | 342   | 64.99  | 13.11 | 63.00  | 38.00  | 121.00 |
| NTRNESDA cases    | Height (m)               | 308  | 1.71   | 0.07  | 1.72   | 1.48   | 1.89   | 344   | 1.58   | 0.07  | 1.59   | 1.40   | 1.75   |
|                   | Age (yrs)                | 527  | 44.65  | 11.84 | 46.00  | 18.00  | 74.00  | 1200  | 41.62  | 12.77 | 42.00  | 18.00  | 77.00  |
|                   | BMI (kg/m <sup>2</sup> ) | 527  | 26.42  | 4.43  | 26.01  | 15.95  | 50.21  | 1200  | 25.41  | 5.31  | 24.23  | 14.61  | 53.27  |
|                   | Weight (kg)              | 527  | 87.07  | 15.22 | 85.50  | 51.00  | 170.00 | 1200  | 72.44  | 15.15 | 70.00  | 44.00  | 167.00 |
| NTRNESDA controls | Height (m)               | 527  | 1.82   | 0.07  | 1.81   | 1.59   | 2.07   | 1200  | 1.69   | 0.06  | 1.69   | 1.51   | 1.96   |
|                   | Age (yrs)                | 683  | 47.17  | 14.45 | 50.00  | 18.00  | 81.00  | 1106  | 43.72  | 13.63 | 42.00  | 18.00  | 78.00  |
|                   | BMI (kg/m <sup>2</sup> ) | 683  | 25.76  | 3.46  | 25.40  | 17.26  | 39.19  | 1106  | 24.86  | 4.22  | 24.08  | 15.88  | 47.32  |
|                   | Weight (kg)              | 683  | 84.98  | 12.53 | 83.80  | 50.10  | 133.10 | 1106  | 71.16  | 12.75 | 68.80  | 44.30  | 150.00 |
| ORCADES*          | Height (m)               | 683  | 1.81   | 0.07  | 1.82   | 1.60   | 2.06   | 1106  | 1.69   | 0.06  | 1.69   | 1.50   | 1.92   |
|                   | Age (yrs)                | 332  | 54.27  | 15.73 | 54.66  | 17.29  | 93.75  | 384   | 53.01  | 15.68 | 54.27  | 17.71  | 97.62  |
|                   | BMI (kg/m <sup>2</sup> ) | 332  | 28.08  | 4.27  | 27.67  | 16.97  | 47.10  | 384   | 27.48  | 5.18  | 26.60  | 18.47  | 47.63  |
|                   | Weight (kg)              | 324  | 85.76  | 13.21 | 84.25  | 44.40  | 148.40 | 371   | 71.06  | 13.69 | 69.10  | 45.60  | 123.10 |
| PLCO              | Height (m)               | 324  | 1.75   | 0.07  | 1.75   | 1.59   | 1.99   | 371   | 1.61   | 0.06  | 1.61   | 1.38   | 1.78   |
|                   | Age (yrs)                | 2238 | 64.2   | 5.1   | 64.0   | 55.0   | 74.0   |       |        |       |        |        |        |
|                   | BMI (kg/m <sup>2</sup> ) | 2238 | 27.5   | 3.8   | 27.1   | 13.3   | 48.2   |       |        |       |        |        |        |
|                   | Weight (kg)              | 2238 | 87.4   | 13.6  | 86.2   | 38.6   | 176.9  |       |        |       |        |        |        |
| Procardis         | Height (m)               | 2238 | 1.78   | 0.07  | 1.78   | 1.55   | 2.08   |       |        |       |        |        |        |
|                   | Age (yrs)                | 1700 | 59.29  | 7.08  | 60.00  | 34.00  | 82.00  | 612   | 61.21  | 6.72  | 62.00  | 33.00  | 81.00  |
|                   | BMI (kg/m <sup>2</sup> ) | 1700 | 27.60  | 3.80  | 27.14  | 18.34  | 48.23  | 612   | 26.71  | 5.00  | 25.94  | 15.43  | 51.37  |
|                   | Weight (kg)              | 1700 | 84.51  | 12.91 | 83.50  | 51.00  | 159.00 | 612   | 71.21  | 13.30 | 69.00  | 42.00  | 145.00 |
| RS-I              | Height (m)               | 1700 | 1.75   | 0.07  | 1.75   | 1.51   | 2.06   | 612   | 1.63   | 0.07  | 1.64   | 1.44   | 1.85   |
|                   | Age (yrs)                | 2427 | 68.13  | 8.16  | 67.05  | 55.01  | 97.81  | 3547  | 70.32  | 9.60  | 69.40  | 55.00  | 99.22  |
|                   | BMI (kg/m <sup>2</sup> ) | 2372 | 25.68  | 2.99  | 25.61  | 14.19  | 38.19  | 3372  | 26.74  | 4.10  | 26.31  | 15.43  | 59.50  |
|                   | Weight (kg)              | 2375 | 78.58  | 10.74 | 77.80  | 41.00  | 122.30 | 3383  | 69.59  | 11.29 | 68.70  | 40.10  | 146.50 |
| RUNMC             | Height (m)               | 2372 | 1.75   | 0.07  | 1.74   | 1.51   | 1.98   | 3375  | 1.61   | 0.07  | 1.61   | 1.01   | 1.91   |
|                   | Age (yrs)                | 1777 | 63.47  | 8.34  | 64.00  | 24.00  | 91.00  | 1096  | 55.41  | 11.14 | 64.00  | 25.00  | 91.00  |
|                   | BMI (kg/m <sup>2</sup> ) | 1777 | 25.98  | 3.66  | 21.90  | 16.10  | 61.30  | 1096  | 25.44  | 4.26  | 24.50  | 17.30  | 52.70  |
|                   | Weight (kg)              | 1777 | 81.49  | 12.33 | 75.00  | 46.00  | 185.00 | 1096  | 70.30  | 12.16 | 75.00  | 46.00  | 150.00 |
| SardiNIA*         | Height (m)               | 1777 | 1.77   | 0.07  | 1.85   | 1.55   | 2.00   | 1096  | 1.66   | 0.06  | 1.75   | 1.38   | 1.85   |
|                   | Age (yrs)                | 1886 | 44.1   | 18.1  | 42.9   | 14.0   | 93.9   | 2419  | 43.2   | 17.3  | 42.1   | 14.0   | 101.3  |
|                   | BMI (kg/m <sup>2</sup> ) | 1885 | 26.1   | 4.1   | 25.9   | 14.9   | 42.9   | 2416  | 24.7   | 5.0   | 23.8   | 13.9   | 53.3   |
|                   | Weight (kg)              | 1883 | 72.3   | 11.7  | 72.0   | 34.0   | 135.0  | 2415  | 59.2   | 11.4  | 57.0   | 32.0   | 145.0  |
| SASBAC cases      | Height (m)               | 1883 | 1.66   | 0.07  | 1.66   | 1.44   | 1.96   | 2415  | 1.55   | 0.07  | 1.55   | 1.31   | 1.78   |
|                   | Age (yrs)                |      |        |       |        |        |        | 795   | 62.64  | 6.26  | 63.00  | 50.00  | 75.00  |
|                   | BMI (kg/m <sup>2</sup> ) |      |        |       |        |        |        | 793   | 25.79  | 4.00  | 25.21  | 16.22  | 46.67  |
|                   | Weight (kg)              |      |        |       |        |        |        | 794   | 69.68  | 11.18 | 68.00  | 40.00  | 117.00 |
| SASBAC controls   | Height (m)               |      |        |       |        |        |        | 794   | 1.64   | 0.06  | 1.65   | 1.47   | 1.82   |
|                   | Age (yrs)                |      |        |       |        |        |        | 764   | 62.77  | 6.34  | 63.00  | 49.00  | 75.00  |
|                   | BMI (kg/m <sup>2</sup> ) |      |        |       |        |        |        | 755   | 25.52  | 4.10  | 25.22  | 16.94  | 59.52  |
|                   | Weight (kg)              |      |        |       |        |        |        | 760   | 68.67  | 11.69 | 67.00  | 42.00  | 168.00 |
| SEARCH/UKOPS      | Height (m)               |      |        |       |        |        |        | 758   | 1.63   | 0.05  | 1.64   | 1.28   | 1.81   |
|                   | Age (yrs)                |      |        |       |        |        |        | 1710  | 57.15  | 10.20 | 58.00  | 20.00  | 91.00  |
|                   | BMI (kg/m <sup>2</sup> ) |      |        |       |        |        |        | 1556  | 26.99  | 5.20  | 25.99  | 17.47  | 53.67  |
|                   | Weight (kg)              |      |        |       |        |        |        | 1581  | 71.32  | 13.99 | 69.00  | 44.00  | 135.17 |
| SHIP              | Height (m)               |      |        |       |        |        |        | 1592  | 1.62   | 0.07  | 1.62   | 1.34   | 1.82   |
|                   | Age (yrs)                | 2019 | 50.88  | 16.43 | 52.00  | 20.00  | 80.00  | 2073  | 48.58  | 16.02 | 48.00  | 20.00  | 81.00  |
|                   | BMI (kg/m <sup>2</sup> ) | 2019 | 27.68  | 4.04  | 27.41  | 18.06  | 48.07  | 2073  | 26.92  | 5.31  | 26.16  | 16.10  | 52.40  |

Supplementary Note - Table 3

| Study     | Trait                    | Men  |       |       |        |       |        | Women |       |       |        |       |        |
|-----------|--------------------------|------|-------|-------|--------|-------|--------|-------|-------|-------|--------|-------|--------|
|           |                          | n    | mean  | SD    | median | min   | max    | n     | mean  | SD    | median | min   | max    |
| T2D_WTCCC | Weight (kg)              | 2019 | 85.06 | 13.56 | 83.80  | 49.90 | 156.40 | 2073  | 71.20 | 13.74 | 69.20  | 41.30 | 133.30 |
|           | Height (m)               | 2019 | 1.75  | 0.07  | 1.75   | 1.48  | 1.98   | 2073  | 1.63  | 0.07  | 1.63   | 1.42  | 1.94   |
|           | Age (yrs)                | 1105 | 58.95 | 9.91  | 59.00  | 29.00 | 96.00  | 798   | 57.94 | 10.45 | 59.00  | 27.00 | 85.00  |
|           | BMI (kg/m <sup>2</sup> ) | 1105 | 30.29 | 5.36  | 29.71  | 18.02 | 55.91  | 798   | 32.56 | 6.87  | 31.52  | 17.91 | 62.37  |
|           | Weight (kg)              | 1105 | 93.37 | 17.86 | 91.17  | 47.63 | 161.94 | 798   | 85.04 | 19.29 | 82.56  | 43.00 | 155.70 |
| TwinsUK*  | Height (m)               | 1105 | 1.75  | 0.07  | 1.75   | 1.50  | 1.98   | 798   | 1.61  | 0.07  | 1.61   | 1.37  | 1.82   |
|           | Age (yrs)                |      |       |       |        |       |        | 1479  | 46.19 | 12.31 | 47.55  | 16.62 | 76.54  |
|           | BMI (kg/m <sup>2</sup> ) |      |       |       |        |       |        | 1477  | 25.02 | 4.80  | 24.06  | 13.22 | 52.71  |
|           | Weight (kg)              |      |       |       |        |       |        | 1477  | 66.03 | 12.97 | 64.00  | 35.10 | 140.90 |
| VIS       | Height (m)               |      |       |       |        |       |        | 1479  | 1.62  | 0.06  | 1.63   | 1.42  | 1.80   |
|           | Age (yrs)                | 328  | 55.95 | 14.94 | 57.00  | 18.00 | 88.00  | 467   | 56.97 | 15.64 | 57.00  | 18.00 | 93.00  |
|           | BMI (kg/m <sup>2</sup> ) | 328  | 27.55 | 3.69  | 27.49  | 18.36 | 40.69  | 467   | 27.18 | 4.50  | 27.08  | 17.01 | 52.02  |
|           | Weight (kg)              | 325  | 85.56 | 13.01 | 84.80  | 50.90 | 136.50 | 445   | 70.99 | 12.45 | 69.80  | 46.60 | 153.00 |
|           | Height (m)               | 325  | 1.76  | 0.07  | 1.76   | 1.58  | 2.04   | 459   | 1.62  | 0.07  | 1.62   | 1.43  | 1.91   |

\*Includes individuals <18 years of age (deCODE: n=3; NBS\_WTCCC: n=10 (17 years); NSPHS: n=55 (range 14-17 years); ORCADES: n=2 (17.3 and 17.7 years); SardiNIA: n=294 (range 14-17 years); TwinsUK: n=5)

## Supplementary Note

**Supplementary Note - Table 4** Study design, number of individuals and sample quality control for genome-wide association studies of stage 2 - *in silico* and *de novo* replication.

## Supplementary Note - Table 4

Supplementary Note - Table 4 -- Study design, number of individuals and sample quality control for genome-wide association studies of stage 2 - in silico and de novo replication.

| Study                                     |                                                                                               | Study design                   | Total sample size (N) | Call rate* | Sample QC                                                                                                                                               | Samples in analyses (N)† | Anthropometric assessment method | References                                                                                                                                                                                                                                                                                                                                                                                                                                                     |
|-------------------------------------------|-----------------------------------------------------------------------------------------------|--------------------------------|-----------------------|------------|---------------------------------------------------------------------------------------------------------------------------------------------------------|--------------------------|----------------------------------|----------------------------------------------------------------------------------------------------------------------------------------------------------------------------------------------------------------------------------------------------------------------------------------------------------------------------------------------------------------------------------------------------------------------------------------------------------------|
| Short name                                | Full name                                                                                     |                                |                       |            | Study specific QC criteria                                                                                                                              |                          |                                  |                                                                                                                                                                                                                                                                                                                                                                                                                                                                |
| <b><i>In silico</i> follow-up studies</b> |                                                                                               |                                |                       |            |                                                                                                                                                         |                          |                                  |                                                                                                                                                                                                                                                                                                                                                                                                                                                                |
| BHS                                       | Busselton Health Study                                                                        | Population-based               | 1,366                 | ≥ 75%      | 1) ethnic outliers;<br>2) related individuals and duplicates;<br>3) Missing body waist and hip.                                                         | 1,327                    | measured                         | James AL, Palmer LJ, Kicic E, et al. Decline in lung function in the Busselton Health Study: the effects of asthma and cigarette smoking. <i>Am J Respir Crit Care Med</i> 2005;171:109-14.<br>Hui J, Oka A, James A, et al. A genome-wide association scan for asthma in a general Australian population. <i>Hum Genet</i> 2008;123:297-306                                                                                                                   |
| Corogene                                  | Genetic Predisposition of Coronary Heart Disease in Patients Verified with Coronary Angiogram | Population-based               | 4,130                 | ≥ 95%      | 1) missing gender<br>2) related individuals and duplicates<br>3) (From this specific analysis) Missing body height and/or weight                        | 3756                     | measured                         | [PMID: 19820697] Soranzo, N. et al. A genome-wide meta-analysis identifies 22 loci associated with eight hematological parameters in the HaemGen consortium. <i>Nat Genet.</i> 2009 Nov;41(11):1182-90. Epub 2009 Oct 11.                                                                                                                                                                                                                                      |
| EGCUT                                     | Estonian Genome Center, University of Tartu                                                   | Population-based               | 345                   | ≥ 95%      | 1) Related individuals and duplicates<br>2) Sex mismatch<br>3) Phenotype missing                                                                        | 345                      | measured                         | Nelis M, Esko T, Magi R, Zimprich F, Zimprich A, et al. (2009) Genetic Structure of Europeans: A View from the North–East. <i>PLoS ONE</i> 4(5): e5472.<br>Metspalu, A. The Estonian Genome Project. <i>Drug Development Research</i> 62, 97-101 (2004).                                                                                                                                                                                                       |
| FHS                                       | Family Heart Study                                                                            | Case-Control                   | 1808                  | ≥ 98%      | 1) technical errors<br>2) discrepancies between reported sex and sex-diagnostic markers                                                                 | 1463                     | measured                         | [PMID: 8651220] M. Higgins <i>et al.</i> , NHLBI Family Heart Study: objectives and design, <i>Am J Epidemiol</i> 143, 1219–1228 (1996).                                                                                                                                                                                                                                                                                                                       |
| FinGesture cases                          | Finnish Genetic Study of Arrhythmic Disease cohort (MI cases only)                            | Disease cohort (MI cases only) | 1,103                 | ≥ 97%      | 1) PLINK heterozygosity F-value <-0.05 or >0.05;<br>2) ethnic outliers;<br>3) related individuals and duplicates;<br>4) Missing body weight and height. | 943                      | measured                         | Kari S. Kaikkonen, Marja-Leena Kortelainen, Eeva Linna, Heikki V. Huikuri. Family History and the Risk of Sudden Cardiac Death as a Manifestation of an Acute Coronary Event <i>Circulation</i> 114, 1462-7 (2006).                                                                                                                                                                                                                                            |
| GOOD                                      | Gothenburg Osteoporosis and Obesity Determinants Study                                        | Population-based               | 1056                  | ≥ 97.5%    | 1) heterozygosity > 33%;<br>2) ethnic outliers;<br>3) related individuals and duplicates.                                                               | 938                      | measured                         | [PMID: 16007330] Lorentzon, M. et al Free testosterone is a positive whereas free estradiol is a negative predictor of cortical bone size in young Swedish men-The GOOD Study. <i>J Bone Miner Res</i> 20, 1334-1341 (2005).                                                                                                                                                                                                                                   |
| HBCS                                      | Helsinki Birth Cohort Study                                                                   | Population-based birth cohort  | 1,872                 | ≥ 95%      | 1) related individuals and duplicates<br>2) (From this specific analysis) Missing body height and/or weight                                             | 1726                     | measured                         | [PMID: 18541567] Ylihärsilä H, Kajantie E, Osmond C, Forsén T, Barker DJ, Eriksson JG. Body mass index during childhood and adult body composition in men and women aged 56-70 y. <i>Am J Clin Nutr.</i> 2008 Jun;87(6):1769-75.<br>[PMID: 15764690] Kajantie E, Osmond C, Barker DJ, Forsén T, Phillips DI, Eriksson JG: Size at birth as a predictor of mortality in adulthood: a follow-up of 350 000 person-years. <i>Int J Epidemiol</i> 2005;34:655-663. |

Supplementary Note - Table 4

| Study                 |                                                                            | Study design                              | Total sample size (N) | Call rate* | Sample QC                                                                                                                                                                                                                                                                       | Samples in analyses (N)† | Anthropometric assessment method | References                                                                                                                                                                                                                                                                                                                                                                                                                                                                                                                                         |
|-----------------------|----------------------------------------------------------------------------|-------------------------------------------|-----------------------|------------|---------------------------------------------------------------------------------------------------------------------------------------------------------------------------------------------------------------------------------------------------------------------------------|--------------------------|----------------------------------|----------------------------------------------------------------------------------------------------------------------------------------------------------------------------------------------------------------------------------------------------------------------------------------------------------------------------------------------------------------------------------------------------------------------------------------------------------------------------------------------------------------------------------------------------|
| Short name            | Full name                                                                  |                                           |                       |            | Study specific QC criteria                                                                                                                                                                                                                                                      |                          |                                  |                                                                                                                                                                                                                                                                                                                                                                                                                                                                                                                                                    |
| HYPERGENES - cases    | HYPERGENES                                                                 | Case-control                              | 2124                  | >90%       | 1) ethnic outliers<br>2) Missing body weight and height.                                                                                                                                                                                                                        | 1788                     | measured                         | <a href="http://www.hypergenes.eu/">http://www.hypergenes.eu/</a>                                                                                                                                                                                                                                                                                                                                                                                                                                                                                  |
| HYPERGENES - controls | HYPERGENES                                                                 | Case-control                              | 1934                  | >90%       | 1) ethnic outliers<br>2) Missing body weight and height.                                                                                                                                                                                                                        | 1838                     | measured                         | <a href="http://www.hypergenes.eu/">http://www.hypergenes.eu/</a>                                                                                                                                                                                                                                                                                                                                                                                                                                                                                  |
| MGS                   | Molecular Genetics of Schizophrenia/NIMH Repository Control Sample         | Population-based (survey research method) | 2681                  | 99.7%      | 1) call rate < 97% for samples, 95% for SNPs<br>2) heterozygosity <26% or >28.5%<br>3) excess duplicate discordancies or mendelian errors (SNPs)<br>4) ethnic outliers (principal component scores)<br>5) related individuals and                                               | 2597                     | self-report                      | [PMID: 19571809] Shi, J, et al. Common variants on chromosome 6p22.1 are associated with schizophrenia. Nature. 2009 Aug 6;460(7256):753-7.<br>[PMID: 18198266] Sanders, A.R. No significant association of 14 candidate genes with schizophrenia in a large European ancestry sample: implications for psychiatric genetics. Am J Psychiatry. 2008 Apr;165(4):497-506.                                                                                                                                                                            |
| NHS                   | The Nurses' Health Study                                                   | Nested case-control                       | 3221                  | >98%       | 1) Low genotyping completion (<98%); 2) Unclear identity and admixed origin; 3) related individuals and duplicates; 4) DNA contamination; 5) Missing body weight and height;                                                                                                    | 2988                     | self-report                      | [PMID: 20147318] Qi L et al. Genetic variants in ABO blood group region, plasma soluble E-selectin levels, and risk of type 2 diabetes. Hum Mol Genet. 2010 Feb 10                                                                                                                                                                                                                                                                                                                                                                                 |
| RS-II                 | Rotterdam Study II                                                         | Population-based                          | 3,011                 | ≥ 97.5%    | 1) gender mismatch with typed X-linked markers;<br>2) excess autosomal heterozygosity ( $F < -0.055$ );<br>3) duplicates and/or 1st degree relatives using IBD PIHAT >40% from PLINK;<br>4) ethnic outliers IBS distances > 4SD mean HaMAP CEU cluster from PLINK;<br>5) Missin | 2,122                    | measured                         | [PMID: 11753597] Visscher, 2001 A comparison of body mass index, waist-hip ratio and waist circumference as predictors of all-cause mortality among the elderly: the Rotterdam study<br>[PMID:19700477] Estrada, 2009 GRIMP: a web- and grid-based tool for high-speed analysis of large-scale genome-wide association using imputed data<br>[PMID:19728115] Hofman, 2009 The Rotterdam Study: 2010 objectives and design update<br>[PMID:1833235] Hofman, 1991 Determinants of disease and disability in the elderly: the Rotterdam Elderly Study |
| Sorbs                 | Sorbs are self-contained population from Eastern Germany, European Descent | Population-based                          | 1097                  | ≥ 94%      | 1) gender mismatch;<br>2) ethnic outliers;<br>3) duplicates;<br>4) Missing body weight and height.                                                                                                                                                                              | 907                      | measured                         | [PMID: 19584900] Tönjes, A. et al. Association of FTO variants with BMI and fat mass in the self-contained population of Sorbs in Germany. Eur J Hum Genet. 2010 Jan;18(1):104-10.                                                                                                                                                                                                                                                                                                                                                                 |

Supplementary Note - Table 4

| Study                                   |                                                                                                                           | Study design            | Total sample size (N) | Call rate* | Sample QC                                                                                                                                                                                                                               | Samples in analyses (N)† | Anthropometric assessment method | References                                                                                                                                                                                                                                                                                                                                                                                                                                                        |
|-----------------------------------------|---------------------------------------------------------------------------------------------------------------------------|-------------------------|-----------------------|------------|-----------------------------------------------------------------------------------------------------------------------------------------------------------------------------------------------------------------------------------------|--------------------------|----------------------------------|-------------------------------------------------------------------------------------------------------------------------------------------------------------------------------------------------------------------------------------------------------------------------------------------------------------------------------------------------------------------------------------------------------------------------------------------------------------------|
| Short name                              | Full name                                                                                                                 |                         |                       |            | Study specific QC criteria                                                                                                                                                                                                              |                          |                                  |                                                                                                                                                                                                                                                                                                                                                                                                                                                                   |
| WGHS                                    | Women's Genome Health Study                                                                                               | Population-based        | 23,294                | >98%       | 1) includes only WGHS participants with confirmed, self-reported European ancestry;<br>2) all SNPs have HWE $p > 10E-6$ ;<br>3) all SNPs have genotype for >90% samples<br>4) only samples with biometric measures included in analysis | 22,888                   | self-report                      | [PMID: 18070814] Ridker PM, Chasman DI, Zee RY, Parker A, Rose L, Cook NR, Buring JE; Women's Genome Health Study Working Group. Rationale, design, and methodology of the Women's Genome Health Study: a genome-wide association study of more than 25,000 initially healthy american women. Clin Chem. 2008 Feb;54(2):249-55. Epub 2007 Dec 10.                                                                                                                 |
| YFS                                     | The Cardiovascular Risk in Young Finns Study                                                                              | Population-based cohort | 2,443                 | ≥ 95%      | 1) missing gender<br>2) related individuals and duplicates<br>3) (From this specific analysis) Missing body height and/or weight                                                                                                        | 1989                     | measured                         | Raitakari OT et al. Cohort profile: The cardiovascular risk in Young Finns Study. Int J Epidemiol. 2008;37:1220-6                                                                                                                                                                                                                                                                                                                                                 |
| <b>De novo follow-up studies</b>        |                                                                                                                           |                         |                       |            |                                                                                                                                                                                                                                         |                          |                                  |                                                                                                                                                                                                                                                                                                                                                                                                                                                                   |
| B58C-WTCCC & B58C replication set (R58) | British 1958 birth cohort (Type 1 Diabetes Genetic Consortium controls & Wellcome Trust Case Control Consortium controls) | Population-based        | 1345                  | N/A        | Missing phenotypes                                                                                                                                                                                                                      | 1340                     | measured                         | [PMID 17255346] Strachan DP, Rudnicka AR, Power C, Shepherd P, Fuller E, Davis A, Gibb I, Kumari M, Rumley A, Macfarlane GJ, Rahi J, Rodgers B, Stansfeld S. Lifecourse influences on health among British adults: effects of region of residence in childhood and adulthood. Int J Epidemiol 2007;36:522-531.<br>[PMID 16155052] Power C, Elliott J. Cohort profile: 1958 British birth cohort (National Child Development Study). Int J Epidemiol 2006;35:34-41 |
| BCG                                     | Barry Caerphilly Growth Study                                                                                             | Population based        | 659                   | N/A        | 1. Missing phenotypes<br>2. Missing DNA                                                                                                                                                                                                 | 634                      | measured                         | [PMID: 12791629 ] Martin, R. M., McCarthy, A., Smith, G. D., Davies, D. P., and Ben-Shlomo, Y. Infant nutrition and blood pressure in early adulthood: the Barry Caerphilly Growth study. American Journal of Clinical Nutrition, 77: 1489-97, 2003.                                                                                                                                                                                                              |
| BPPP                                    | Botnia Prevalence, Prediction and Prevention of Diabetes study                                                            | Population-based        | 3505                  | N/A        | 1. Missing phenotypes<br>2. Missing DNA                                                                                                                                                                                                 | 3471                     | measured                         | Isomaa B, Forsén B, Lahti K, Holmström N, Wadén J, Matintupa O, Almgren P, Eriksson JG, Lyssenko V, Taskinen M-R, Tuomi T, Groop LC. A family history of diabetes is associated with reduced physical fitness in the Prevalence, Prediction and Prevention of Diabetes (PPP)-Botnia study. Diabetologia 2010, in press.                                                                                                                                           |
| BWHHS                                   | British Women's Heart and Health Study                                                                                    | Population based        | 3757                  | N/A        | 1. Missing phenotypes<br>2. Missing DNA                                                                                                                                                                                                 | 3687                     | measured                         | Lawlor, D. A., Bedford, C., Taylor, M., and Ebrahim, S. Geographical variation in cardiovascular disease, risk factors, and their control in older women: British Women's Heart and Health Study. Journal of Epidemiology & Community Health. 57: 134-40. 2003.                                                                                                                                                                                                   |
| DESIR                                   | Data from the Epidemiological Study on the Insulin Resistance Syndrome                                                    | Population-based        | 5212                  | N/A        | 1. Missing DNA<br>2. Missing phenotypes<br>3. Non Europeans or born outside continental France                                                                                                                                          | 4535                     | measured                         | [PMID: 8927780] Balkau B. [An epidemiologic survey from a network of French Health Examination Centres, (D.E.S.I.R.): epidemiologic data on the insulin resistance syndrome]. Rev Epidemiol Sante Publique. 1996 Aug;44(4):373-5. French.                                                                                                                                                                                                                         |

Supplementary Note - Table 4

| Study                            |                                                                                                                | Study design     | Total sample size (N) | Call rate* | Sample QC                               | Samples in analyses (N)† | Anthropometric assessment method | References                                                                                                                                                                                                                                                                                                                                                                                                                           |
|----------------------------------|----------------------------------------------------------------------------------------------------------------|------------------|-----------------------|------------|-----------------------------------------|--------------------------|----------------------------------|--------------------------------------------------------------------------------------------------------------------------------------------------------------------------------------------------------------------------------------------------------------------------------------------------------------------------------------------------------------------------------------------------------------------------------------|
| Short name                       | Full name                                                                                                      |                  |                       |            | Study specific QC criteria              |                          |                                  |                                                                                                                                                                                                                                                                                                                                                                                                                                      |
| DIAGEN                           | Diabetes Genetics                                                                                              | Population-based | 1855                  | N/A        | Missing phenotypes                      | 1821                     | measured                         | [PMID: 16801592] Fischer S. et al. Hypoadiponectinemia is associated with progression toward type 2 diabetes and genetic variation in the ADIPOQ gene promoter. <i>Diabetes Care</i> 29, 1645-50 (2006).                                                                                                                                                                                                                             |
| EGCUT                            | Estonian Genome Center, University of Tartu                                                                    | Population-based | 3779                  | N/A        | 1. Missing phenotypes                   | 3779                     | measured                         | Nelis M, Esko T, Magi R, Zimprich F, Zimprich A, et al. (2009) Genetic Structure of Europeans: A View from the North–East. <i>PLoS ONE</i> 4(5): e5472.<br>Metspalu, A. The Estonian Genome Project. <i>Drug Development Research</i> 62, 97-101 (2004).                                                                                                                                                                             |
| EPIC-Norfolk                     | European Prospective Investigation into Cancer and Nutrition - Norfolk                                         | Population-based | 19086                 | N/A        | 1. Missing phenotypes<br>2. Missing DNA | 18484                    | measured                         | [PMID: 10466767] Day, N.E. et al. EPIC-Norfolk: study design and characteristics of the cohort. <i>European Prospective Investigation of Cancer. British Journal of Cancer</i> 80, 95-103 (1999).                                                                                                                                                                                                                                    |
| EPIC-Potsdam                     | European Prospective Investigation into Cancer and Nutrition - Potsdam                                         | Population-based | 5,000                 | N/A        | 1. Missing DNA                          | 4,996                    | measured                         | [PMID: 10592369] Boeing, H. et al. Recruitment procedures of EPIC-Germany. <i>European Investigation into Cancer and Nutrition. Ann Nutr Metab</i> 43, 205-215 (1999)                                                                                                                                                                                                                                                                |
| Finrisk                          | FINRISK 97                                                                                                     | Population-based | 8447                  | N/A        | 1. Missing phenotypes<br>2. Missing DNA | 7818                     | measured                         | Vartiainen, E. et al. Cardiovascular risk factor changes in Finland, 1972-1997. <i>Int. J. Epidemiol.</i> 29, 49-56 (2000).                                                                                                                                                                                                                                                                                                          |
| FUSION Stage 2 T2D - cases**     | Finland-United States Investigation of NIDDM Genetics: T2D cases                                               | Case-control     | 1233                  | N/A        | Missing phenotypes                      | 1226                     | measured                         | [PMID 17463248] Scott L.J. et al. A genome-wide association study of type 2 diabetes in Finns detects multiple susceptibility variants. <i>Science</i> 316, 1341-5 (2007).                                                                                                                                                                                                                                                           |
| FUSION Stage 2 T2D - controls*** | Finland-United States Investigation of NIDDM Genetics: T2D controls                                            | Case-control     | 3704                  | N/A        | Missing phenotypes                      | 3696                     | measured                         | [PMID 17463248] Scott L.J. et al. A genome-wide association study of type 2 diabetes in Finns detects multiple susceptibility variants. <i>Science</i> 316, 1341-5 (2007).                                                                                                                                                                                                                                                           |
| HUNT2                            | Nord-Trøndelag Health (HUNT) 2 Study                                                                           | Population-based | 6399                  | N/A        | Missing phenotypes                      | 4864                     | measured                         | [PMID 10546013] Midthjell, K. et al. Rapid changes in the prevalence of obesity and known diabetes mellitus in an adult Norwegian population. The Nord-Trøndelag Health Surveys: 1984-1986 and 1995-1997. <i>Diabetes Care</i> 22, 1813-1820 (1999). Holmen, J. et al. The Nord-Trøndelag Health Study 1995-97 (HUNT 2). Objectives, contents, methods and participation. <i>Norwegian Journal of Epidemiology</i> 13, 19-32 (2003). |
| Inter99                          | A population-based primary prevention study on cardiovascular disease and type 2 diabetes                      | Population-based | 6,514                 | N/A        | 1. Missing phenotypes<br>2. Missing DNA | 6,510                    | measured                         | [PMID: 14663300] Jørgensen T, Borch-Johnsen K, Thomsen TF, Ibsen H, Glümer C, Pisinger C. A randomized non-pharmacological intervention study for prevention of ischaemic heart disease: baseline results Inter99. <i>Eur J Cardiovasc Prev Rehabil.</i> 2003 Oct;10(5):377-86.                                                                                                                                                      |
| KORA2                            | Cooperative Health Research in the Region of Augsburg, KOoperative Gesundheitsforschung in der Region Augsburg | Population-based | 3692                  | N/A        | 1. Missing phenotypes<br>2. Missing DNA | 3691                     | measured                         | [PMID 20031538] Heid IM, Boes E, Müller M, Kollerits B et al. Genome-wide association analysis of high-density lipoprotein cholesterol in the population-based KORA study sheds new light on intergenic regions. <i>Circ Cardiovasc Genet.</i> 2008; 1(1):10-20.                                                                                                                                                                     |

Supplementary Note - Table 4

| Study      |                                                                                                                | Study design     | Total sample size (N) | Call rate* | Sample QC                               | Samples in analyses (N)† | Anthropometric assessment method | References                                                                                                                                                                                                                                                |
|------------|----------------------------------------------------------------------------------------------------------------|------------------|-----------------------|------------|-----------------------------------------|--------------------------|----------------------------------|-----------------------------------------------------------------------------------------------------------------------------------------------------------------------------------------------------------------------------------------------------------|
| Short name | Full name                                                                                                      |                  |                       |            | Study specific QC criteria              |                          |                                  |                                                                                                                                                                                                                                                           |
| KORA3      | Cooperative Health Research in the Region of Augsburg, KOoperative Gesundheitsforschung in der Region Augsburg | Population-based | 1498                  | N/A        | 1. Missing phenotypes<br>2. Missing DNA | 1324                     | measured                         | [PMID 16032514] Wichmann HE, Gieger C, Illig T; MONICA/KORA Study Group. KORA-gen--resource for population genetics, controls and a broad spectrum of disease phenotypes. Gesundheitswesen. 2005 Aug;67 Suppl 1:S26-30.                                   |
| KORA4      | Cooperative Health Research in the Region of Augsburg, KOoperative Gesundheitsforschung in der Region Augsburg | Population-based | 1502                  | N/A        | 1. Missing phenotypes<br>2. Missing DNA | 1502                     | measured                         | [PMID 16032514] Wichmann HE, Gieger C, Illig T; MONICA/KORA Study Group. KORA-gen--resource for population genetics, controls and a broad spectrum of disease phenotypes. Gesundheitswesen. 2005 Aug;67 Suppl 1:S26-30.                                   |
| METSIM     | Metabolic Syndrome in Men                                                                                      | Population-based | 8182                  | N/A        | Missing phenotypes                      | 7127                     | measured                         | [PMID: 19223598] Stancakova A. et al. Changes in insulin sensitivity and insulin release in relation to glycemia and glucose tolerance in 6414 Finnish men. Diabetes 58, 1212-21 (2009).                                                                  |
| OBB        | Oxford Biobank                                                                                                 | Population-based | 1,469                 | N/A        | 1. Missing phenotypes<br>2. Missing DNA | 1469                     | measured                         | Tan GD, Neville MJ, Liverani E, Humphreys SM, Currie JM, Dennis L, Fielding BA, Karpe F. The in vivo effects of the Pro12Ala PPARgamma2 polymorphism on adipose tissue NEFA metabolism: the first use of the Oxford Biobank. Diabetologia. 2006;49:158-68 |

\*Sample genotyping success rate; i.e. percentage of successfully genotyped SNPs per sample

\*\*Includes samples from Health 2000, Dehko2D 2004, Finrisk 1987 and 2002, Savitaipale Diabetes Study and Action LADA

\*\*\*Includes samples from Health 2000, Dehko2D 2004, Finrisk 1987 and 2002, and Savitaipale Diabetes Study

†Ns reported are numbers of individuals association data was provided for; Ns in paper may vary due to effective sample size used in meta-analyses



## Supplementary Note

**Supplementary Note - Table 5** Information on genotyping methods, quality control of SNPs, imputation, and statistical analysis for stage 2 *in silico* and *de novo* replication studies.

Supplementary Note - Table 5

Supplementary Note - Table 5 -- Information on genotyping methods, quality control of SNPs, imputation, and statistical analysis for stage 2 in silico and de novo replication studies.

| Study                                   | Platform                                                                | Genotyping                    |                                 |                               |                   | SNPs that met QC criteria           | Imputation software | Imputation |                                         | Association analyses  |                          |
|-----------------------------------------|-------------------------------------------------------------------------|-------------------------------|---------------------------------|-------------------------------|-------------------|-------------------------------------|---------------------|------------|-----------------------------------------|-----------------------|--------------------------|
|                                         |                                                                         | Genotype calling algorithm    | MAF                             | Inclusion criteria Call rate* | p for HWE         |                                     |                     | MAF        | Inclusion criteria Imputation quality** | SNPs in meta-analysis | Analysis software        |
| <b>In silico follow-up studies</b>      |                                                                         |                               |                                 |                               |                   |                                     |                     |            |                                         |                       |                          |
| BHS                                     | Illumina Human 610-Quad                                                 | Beadstudio                    | ≥ 1%                            | ≥ 95%                         | $> 10^{-6}$       | 549,284                             | MACH                | ≥1%        | proper-info ≥ 0.30                      | 1,977,680             | R                        |
| Corogene                                | Illumina BeadChip Human 610-Quad                                        | Illuminus                     | ≥ 1%                            | ≥ 95%                         | $> 10^{-6}$       | 554,988                             | MACH                | ≥1%        | none                                    | 2,543,887             | PLINK                    |
| EGCUT                                   | Illumina Beadarray Human370CNV                                          | Beadstudio                    | ≥ 1%                            | ≥ 98%                         | $> 10^{-6}$       | 316,924                             | IMPUTE              | ≥ 1%       | proper-info ≥ 0.30                      | 2,345,812             | SNPtest                  |
| FHS                                     | Illumina 1Million GeneChip                                              | BeadStudio                    | ≥1%                             | ≥ 98%                         | $> 10^{-6}$       | 863,024                             | MACH-1.0.16         | ≥1%        | r2-hat ≥ 0.30                           | 2,453,887             | SAS                      |
| FinGesture cases                        | Affymetrix Genome-Wide Human SNP Array 6.0                              | Birdseed                      | ≥ 5%                            | ≥ 95%                         | $> 10^{-6}$       | 606,717                             | MACH                | 0%         | r2-hat ≥ 0.30                           | 665                   | MACH2QTL                 |
| GOOD                                    | Illumina Infinium HumanHap 610K                                         | BeadStudio                    | ≥ 1%                            | ≥ 98%                         | $> 10^{-6}$       | 521,160                             | MACH                | none       | none                                    | 2,543,887             | MACH2QTL                 |
| HBCS                                    | Illumina custom made BeadChip Human 670-Quad                            | Illuminus                     | ≥ 1%                            | ≥ 95%                         | $> 10^{-6}$       | 533491                              | MACH                | ≥1%        | none                                    | 2,543,887             | PLINK                    |
| HYPERGENES - cases                      | Illumina Human1M-Duov3_B                                                | GenCall, Beadstudio           | ≥ 1%                            | ≥ 90%                         | $> 10^{-7}$       | Center I: 861759, Center II: 872576 | MACH                | none       | none                                    | 2,543,887             | Matlab                   |
| HYPERGENES - controls                   | Illumina Human1M-Duov3_B                                                | GenCall, Beadstudio           | ≥ 1%                            | ≥ 90%                         | $> 10^{-7}$       | Center I: 861759, Center II: 872576 | MACH                | none       | none                                    | 2,543,887             | Matlab                   |
| MGS                                     | Affymetrix Genome-Wide Human SNP Array 6.0                              | Birdsuite 2.0                 | ≥ 1%                            | ≥ 95%                         | $> 10^{-6}$       | 696,492                             | MACH 1.0            | ≥1%        | r2-hat ≥ 0.30                           | 696,492               | PLINK and local software |
| NHS                                     | Affymetrix Genome-Wide Human 6.0 array                                  | Birdseed calling algorithm v2 | ≥ 2%                            | ≥ 98%                         | $> 10^{-4}$       | 704,409                             | MACH                | ≥ 2%       | r2-hat ≥ 0.30                           | 2,543,887             | ProbABEL                 |
| RS-II                                   | Illumina / HumanHap 550 V.3 DUO; Illumina / HumanHap 610 QUAD           | Genomestudio                  | ≥ 1%                            | ≥ 97.5%                       | $> 10^{-6}$       | 466,389                             | MACH                | ≥1%        | (O/E)σ2 ratio ≥ 0.1                     | 667                   | MACH2QTL                 |
| Sorbs                                   | 500K Affymetrix GeneChip and Affymetrix Genome-Wide Human SNP Array 6.0 | Genecall                      | ≥ 1%                            | ≥ 95%                         | $> 10^{-4}$       | 378,513                             | V.1.000.16          | >1%        | proper-info ≥ 0.40                      | 2,352,557             | SNPTEST                  |
| WGHS                                    | Illumina HumanHap300 Duo "+"                                            | BRLMM (500K), Birdseed (6.0)  | NA                              | ≥ 90%                         | $> 10^{-6}$       | 339,596                             | IMPUTE              | NA         | none                                    | 2,608,508             | R                        |
| YFS                                     | Illumina custom made BeadChip Human 670-Quad                            | Beadstudio v 3.3              | ≥ 1%                            | ≥ 95%                         | $> 10^{-6}$       | 546,674                             | MACH                | ≥1%        | none                                    | 2,543,887             | PLINK                    |
| <b>De novo follow-up studies</b>        |                                                                         |                               |                                 |                               |                   |                                     |                     |            |                                         |                       |                          |
| Study                                   | Platform                                                                | Call rate                     | Concordance rate for duplicates | p for HWE                     | Analysis software |                                     |                     |            |                                         |                       |                          |
| B58C-WTCCC & B58C replication set (R58) | Custom TaqMan® SNP Genotyping Assays                                    | ≥ 90%                         | NA                              | $> 10^{-3}$                   | SNPTEST           |                                     |                     |            |                                         |                       |                          |
| BCG                                     | KASPAR (Kbiosciences)                                                   | > 90%                         | -                               | $> 10^{-3}$                   | STATA 10          |                                     |                     |            |                                         |                       |                          |

Supplementary Note - Table 5

| Study                   | Platform                                                                 | Call rate | Concordance rate for duplicates | p for HWE          | Analysis software |
|-------------------------|--------------------------------------------------------------------------|-----------|---------------------------------|--------------------|-------------------|
| BPPP                    | iPLEX™ Sequenom MassARRAY®                                               | ≥ 95%     | ≥ 99%                           | > 10 <sup>-6</sup> | PLINK             |
| BWHHS                   | KASPAR (Kbiosciences)                                                    | > 90%     | -                               | > 10 <sup>-3</sup> | STATA 10          |
| DESIR                   | SNPdex, Applied biosystems, Foster City, CA, USA                         | ≥ 95%     | none                            | ≥ 10 <sup>-6</sup> | R                 |
| DIAGEN                  | Sequenom MassARRAY® system ((Sequenom, San Diego, USA)                   | ≥ 88%     | ≥ 98.7%                         | > .005             | Merlin            |
| EGCUT                   | Custom TaqMan® SNP Genotyping Assays                                     | ≥ 90%     | NA                              | > 10 <sup>-3</sup> | PLINK             |
| EPIC-Norfolk            | 1. Custom TaqMan® SNP Genotyping Assays<br>2. Sequenom MassARRAY® system | ≥ 95%     | ≥ 97%                           | > 10 <sup>-6</sup> | SAS               |
| EPIC-Potsdam            | KASPar assay system (KBiosciences, Herts, UK)                            | ≥ 95%     | not tested                      | > 0.01             | SAS               |
| Finrisk                 | iPLEX™ Sequenom MassARRAY®                                               | ≥ 95%     | ≥ 99%                           | > 10 <sup>-6</sup> | PLINK             |
| FUSION STAGE2 T2D cases | Sequenom MassARRAY® system                                               | ≥ 94%     | 100%                            | >.03               | Merlin            |
| FUSION STAGE2 controls  | Sequenom MassARRAY® system                                               | ≥ 94%     | 100%                            | >.03               | Merlin            |
| HUNT                    | Sequenom MassARRAY® system                                               | ≥ 92%     | 100%                            | > .005             | Merlin            |
| Inter99                 | Kbioscience allele-specific PCR (KASPar)                                 | ≥ 95%     | ≥ 99%                           | > 10 <sup>-6</sup> | R                 |
| KORA2                   | iPLEX™ Sequenom MassARRAY®                                               | ≥ 90%     | -                               | ≥ 0.001            | R                 |
| KORA3                   | iPLEX™ Sequenom MassARRAY®                                               | ≥ 90%     | -                               | ≥ 0.001            | R                 |
| KORA4                   | iPLEX™ Sequenom MassARRAY®                                               | ≥ 90%     | -                               | ≥ 0.001            | R                 |
| METSIM                  | Sequenom MassARRAY® system                                               | ≥ 94%     | ≥ 99.5%                         | > .005             | Merlin            |
| OBB                     | Custom TaqMan® SNP Genotyping Assays                                     | ≥ 90%     | NA                              | > 10 <sup>-3</sup> | SNPTEST           |

\* Sample genotyping success rate; i.e. percentage of successfully genotyped SNPs per sample

\*\* SNPtest calculates the 'proper\_info' statistic as a measure of the relative statistical information about the additive genetic effect being estimated. The proper\_info statistic has a direct relationship to the power of the test and ranges from 0 to 1, with 1 indicating perfect information. MACH calculates the 'rsq\_hat', which is the r2 between each imputed genotype and its true underlying genotype. Rsq\_hat ranges from 0 to 1, with 1 indicating perfect imputation

## Supplementary Note

**Supplementary Note - Table 6** Study-specific descriptive statistics for stage 2 *in silico* and *de novo* replication studies.

Supplementary Note - Table 6 -- Study-specific descriptive statistics for stage 2 in silico and de novo replication studies

| Study                                   | Trait                    | Men   |       |       |        |       |        | Women |        |       |        |       |        |
|-----------------------------------------|--------------------------|-------|-------|-------|--------|-------|--------|-------|--------|-------|--------|-------|--------|
|                                         |                          | n     | mean  | SD    | median | min   | max    | n     | mean   | SD    | median | min   | max    |
| <b>In silico follow-up studies</b>      |                          |       |       |       |        |       |        |       |        |       |        |       |        |
| BHS*                                    | Age (yrs)                | 558   | 53.47 | 17.15 | 53.65  | 17.60 | 91.40  | 769   | 53.72  | 17.08 | 53.10  | 17.30 | 90.50  |
|                                         | BMI (kg/m <sup>2</sup> ) | 558   | 26.62 | 3.57  | 26.25  | 15.77 | 40.12  | 769   | 25.49  | 4.42  | 24.66  | 16.82 | 40.77  |
|                                         | Weight (kg)              | 558   | 81.80 | 12.31 | 80.25  | 46.40 | 127.00 | 769   | 67.06  | 12.02 | 65.00  | 34.80 | 109.00 |
|                                         | Height (m)               | 558   | 1.75  | 0.07  | 1.75   | 1.53  | 1.99   | 769   | 1.62   | 0.06  | 1.62   | 1.35  | 1.90   |
| Corogene                                | Age (yrs)                | 2266  | 59.66 | 12.83 | 61.00  | 25.00 | 92.00  | 1490  | 62.61  | 13.47 | 65.00  | 25.00 | 94.00  |
|                                         | BMI (kg/m <sup>2</sup> ) | 2265  | 27.39 | 4.23  | 26.79  | 15.95 | 54.88  | 1491  | 26.87  | 5.21  | 26.07  | 13.63 | 57.68  |
|                                         | Weight (kg)              | 2265  | 85.00 | 14.42 | 83.50  | 44.00 | 170.00 | 1491  | 70.14  | 13.88 | 68.30  | 36.00 | 144.00 |
|                                         | Height (m)               | 2267  | 1.76  | 0.07  | 1.76   | 1.34  | 2.03   | 1491  | 1.62   | 0.07  | 1.62   | 1.05  | 1.85   |
| EGCUT                                   | Age (yrs)                | 135   | 40.93 | 17.81 | 36.50  | 18.00 | 80.00  | 210   | 41.03  | 16.46 | 39.00  | 18.00 | 87.00  |
|                                         | BMI (kg/m <sup>2</sup> ) | 135   | 26.03 | 4.95  | 25.11  | 17.30 | 43.65  | 210   | 25.63  | 6.09  | 24.02  | 17.00 | 48.24  |
|                                         | Weight (kg)              | 135   | 83.68 | 16.41 | 80.50  | 50.00 | 143.00 | 210   | 70.46  | 16.22 | 66.50  | 40.00 | 136.00 |
|                                         | Height (m)               | 135   | 1.79  | 0.07  | 1.80   | 1.58  | 2.04   | 210   | 1.66   | 0.07  | 1.66   | 1.44  | 1.84   |
| FHS                                     | Age (yrs)                | 662   | 48.20 | 13.70 | 46.30  | 25.60 | 85.70  | 880   | 47.50  | 13.00 | 45.00  | 25.70 | 85.80  |
|                                         | BMI (kg/m <sup>2</sup> ) | 632   | 27.80 | 4.30  | 27.20  | 18.40 | 46.20  | 831   | 27.10  | 6.10  | 26.10  | 16.50 | 55.00  |
|                                         | Weight (kg)              | 632   | 87.10 | 14.60 | 85.30  | 55.30 | 140.60 | 831   | 72.30  | 16.60 | 68.90  | 41.70 | 144.20 |
|                                         | Height (m)               | 632   | 1.77  | 0.07  | 1.77   | 1.57  | 2.03   | 831   | 1.63   | 0.06  | 1.63   | 1.41  | 1.96   |
| FinGesture cases                        | Age (yrs)                | 745   | 61.19 | 10.58 | 62.00  | 34.00 | 85.00  | 198   | 67.44  | 10.33 | 68.00  | 31.00 | 85.00  |
|                                         | BMI (kg/m <sup>2</sup> ) | 739   | 27.22 | 3.93  | 27.02  | 16.20 | 44.80  | 196   | 28.14  | 5.17  | 27.98  | 16.67 | 46.09  |
|                                         | Weight (kg)              | 743   | 82.32 | 14.09 | 81.00  | 42.00 | 150.00 | 197   | 71.91  | 14.06 | 71.60  | 37.50 | 112.00 |
|                                         | Height (m)               | 745   | 1.74  | 0.07  | 1.74   | 1.55  | 1.97   | 198   | 1.60   | 0.06  | 1.60   | 1.46  | 1.76   |
| GOOD                                    | Age (yrs)                | 938   | 18.90 | 0.60  | 18.80  | 18.00 | 20.10  |       |        |       |        |       |        |
|                                         | BMI (kg/m <sup>2</sup> ) | 938   | 22.40 | 3.20  | 21.90  | 16.10 | 41.60  |       |        |       |        |       |        |
|                                         | Weight (kg)              | 938   | 73.90 | 11.60 | 72.00  | 51.30 | 127.00 |       |        |       |        |       |        |
|                                         | Height (m)               | 938   | 1.82  | 0.07  | 1.82   | 1.61  | 2.03   |       |        |       |        |       |        |
| HBCS                                    | Age (yrs)                | 737   | 61.41 | 2.75  | 60.80  | 57.00 | 69.30  | 991   | 61.55  | 3.05  | 60.90  | 56.70 | 69.80  |
|                                         | BMI (kg/m <sup>2</sup> ) | 736   | 27.56 | 4.30  | 27.01  | 18.75 | 68.39  | 990   | 27.75  | 5.06  | 26.98  | 14.79 | 50.10  |
|                                         | Weight (kg)              | 737   | 86.33 | 14.51 | 84.50  | 56.20 | 213.30 | 990   | 73.90  | 13.89 | 71.70  | 37.30 | 133.80 |
|                                         | Height (m)               | 736   | 1.77  | 0.06  | 1.77   | 1.59  | 1.97   | 990   | 1.63   | 0.06  | 1.63   | 1.46  | 1.83   |
| HYPERGENES - cases*                     | Age (yrs)                | 1190  | 49.41 | 10.41 | 50.00  | 17.63 | 84.00  | 598   | 48.47  | 9.58  | 49.00  | 18.38 | 93.00  |
|                                         | BMI (kg/m <sup>2</sup> ) | 1190  | 27.42 | 3.52  | 27.13  | 16.00 | 47.43  | 598   | 26.85  | 4.86  | 26.21  | 17.45 | 46.32  |
|                                         | Weight (kg)              | 1190  | 81.35 | 12.08 | 80.00  | 49.00 | 139.50 | 598   | 68.42  | 13.09 | 67.00  | 44.00 | 114.50 |
|                                         | Height (m)               | 1190  | 1.72  | 0.07  | 1.72   | 1.48  | 2.11   | 598   | 1.60   | 0.07  | 1.60   | 1.30  | 1.97   |
| HYPERGENES - controls                   | Age (yrs)                | 1072  | 62.27 | 10.71 | 59.81  | 28.00 | 98.00  | 766   | 64.30  | 11.28 | 61.00  | 44.93 | 113.00 |
|                                         | BMI (kg/m <sup>2</sup> ) | 1072  | 25.95 | 3.27  | 25.59  | 10.15 | 40.77  | 766   | 24.98  | 3.73  | 24.60  | 16.53 | 41.35  |
|                                         | Weight (kg)              | 1072  | 76.10 | 10.59 | 75.00  | 29.00 | 118.00 | 766   | 64.25  | 10.13 | 63.00  | 41.00 | 110.00 |
|                                         | Height (m)               | 1072  | 1.71  | 0.07  | 1.70   | 1.50  | 1.96   | 766   | 1.60   | 0.06  | 1.60   | 1.40  | 1.81   |
| MGS                                     | Age (yrs)                | 1,247 | 52.67 | 16.01 | 52.00  | 18.00 | 90.00  | 1,350 | 48.48  | 16.29 | 48.00  | 18.00 | 90.00  |
|                                         | BMI (kg/m <sup>2</sup> ) | 1,247 | 30.85 | 6.45  | 29.84  | 15.83 | 72.56  | 1,350 | 31.92  | 8.55  | 30.32  | 16.34 | 69.09  |
|                                         | Weight (kg)              | 1,247 | 98.77 | 22.67 | 95.25  | 53.98 | 249.48 | 1,350 | 86.13  | 24.22 | 81.65  | 47.63 | 201.85 |
|                                         | Height (m)               | 1247  | 1.79  | 0.07  | 1.78   | 1.58  | 2.06   | 1350  | 1.64   | 0.07  | 1.65   | 1.35  | 2.01   |
| NHS                                     | Age (yrs)                |       |       |       |        |       |        | 2988  | 53.40  | 6.74  | 54.00  | 39.00 | 65.00  |
|                                         | BMI (kg/m <sup>2</sup> ) |       |       |       |        |       |        | 2988  | 27.13  | 5.63  | 26.00  | 17.01 | 54.87  |
|                                         | Weight (kg)              |       |       |       |        |       |        | 2988  | 160.87 | 35.21 | 155.00 | 90.00 | 340.00 |
|                                         | Height (m)               |       |       |       |        |       |        | 2988  | 1.64   | 0.06  | 1.63   | 1.35  | 1.83   |
| RS-II                                   | Age (yrs)                | 973   | 64.48 | 7.59  | 61.89  | 55.14 | 93.95  | 1156  | 65.04  | 8.33  | 62.03  | 55.12 | 95.33  |
|                                         | BMI (kg/m <sup>2</sup> ) | 971   | 26.92 | 3.36  | 26.72  | 16.78 | 40.52  | 1151  | 27.52  | 4.45  | 26.89  | 16.66 | 50.12  |
|                                         | Weight (kg)              | 972   | 83.32 | 11.58 | 82.20  | 54.00 | 126.80 | 1151  | 72.77  | 12.74 | 71.10  | 36.20 | 150.00 |
|                                         | Height (m)               | 971   | 1.76  | 0.06  | 1.75   | 1.56  | 2.03   | 1153  | 1.63   | 0.06  | 1.62   | 1.41  | 1.89   |
| Sorbs                                   | Age (yrs)                | 371   | 48.10 | 16.70 | 48.10  | 18.10 | 82.10  | 536   | 48.00  | 15.90 | 48.60  | 18.00 | 88.40  |
|                                         | BMI (kg/m <sup>2</sup> ) | 371   | 27.20 | 4.00  | 26.80  | 19.00 | 43.90  | 536   | 26.90  | 5.50  | 26.20  | 15.40 | 47.40  |
|                                         | Weight (kg)              | 371   | 85.40 | 12.70 | 84.00  | 58.00 | 139.00 | 536   | 72.10  | 14.00 | 70.00  | 43.00 | 126.00 |
|                                         | Height (m)               | 371   | 1.77  | 0.07  | 1.77   | 1.58  | 1.95   | 536   | 1.64   | 0.07  | 1.64   | 1.44  | 1.82   |
| WGHS                                    | Age (yrs)                |       |       |       |        |       |        | 22888 | 54.69  | 7.11  | 52.90  | 38.71 | 89.89  |
|                                         | BMI (kg/m <sup>2</sup> ) |       |       |       |        |       |        | 22888 | 25.91  | 4.96  | 24.89  | 14.23 | 59.58  |
|                                         | Weight (kg)              |       |       |       |        |       |        | 22888 | 70.03  | 14.15 | 68.04  | 38.56 | 175.09 |
|                                         | Height (m)               |       |       |       |        |       |        | 22888 | 1.64   | 0.06  | 1.65   | 1.30  | 2.01   |
| YFS                                     | Age (yrs)                | 1123  | 37.55 | 5.06  | 39.00  | 30.00 | 45.00  | 1320  | 37.57  | 5.01  | 39.00  | 30.00 | 45.00  |
|                                         | BMI (kg/m <sup>2</sup> ) | 908   | 26.76 | 4.29  | 26.11  | 17.54 | 49.35  | 1081  | 25.32  | 5.03  | 24.34  | 16.56 | 58.82  |
|                                         | Weight (kg)              | 908   | 86.56 | 15.65 | 85.00  | 54.00 | 166.00 | 1083  | 69.82  | 14.55 | 67.00  | 42.00 | 166.00 |
|                                         | Height (m)               | 911   | 1.80  | 0.07  | 1.80   | 1.57  | 2.03   | 1084  | 1.66   | 0.06  | 1.66   | 1.45  | 1.89   |
| <b>De novo follow-up studies</b>        |                          |       |       |       |        |       |        |       |        |       |        |       |        |
| B58C-WTCCC & B58C replication set (R58) | Age (yrs)                | 683   | 45.30 | 0.36  | 45.42  | 44.25 | 46.00  | 657   | 45.33  | 0.34  | 45.42  | 44.25 | 46.00  |
|                                         | BMI (kg/m <sup>2</sup> ) | 683   | 27.26 | 4.11  | 26.69  | 18.06 | 43.05  | 657   | 27.64  | 5.47  | 26.50  | 14.34 | 41.42  |
|                                         | Weight (kg)              | 683   | 85.54 | 14.14 | 84.00  | 55.60 | 145.00 | 657   | 71.97  | 15.10 | 69.30  | 40.00 | 127.00 |
|                                         | Height (m)               | 683   | 1.76  | 0.07  | 1.76   | 1.58  | 1.98   | 657   | 1.63   | 0.06  | 1.63   | 1.42  | 1.83   |
| BCG                                     | Age (yrs)                | 361   | 25.02 | 0.76  | 25.00  | 23.17 | 27.25  | 318   | 25.01  | 0.76  | 25.00  | 23.08 | 26.75  |
|                                         | BMI (kg/m <sup>2</sup> ) | 359   | 25.08 | 3.91  | 24.76  | 15.84 | 41.78  | 314   | 25.23  | 5.35  | 23.83  | 16.97 | 47.85  |
|                                         | Weight (kg)              | 360   | 78.97 | 13.12 | 78.00  | 45.00 | 127.00 | 316   | 67.66  | 14.52 | 64.25  | 42.00 | 141.00 |
|                                         | Height (m)               | 359   | 1.77  | 0.06  | 1.77   | 1.53  | 1.96   | 315   | 1.64   | 0.06  | 1.64   | 1.46  | 1.80   |
| BPPP                                    | Age (yrs)                | 1633  | 49.26 | 15.95 | 51.07  | 19.06 | 76.39  | 1813  | 49.14  | 16.03 | 51.25  | 18.76 | 76.80  |
|                                         | BMI (kg/m <sup>2</sup> ) | 1646  | 23.70 | 3.43  | 23.37  | 13.97 | 43.95  | 1825  | 21.29  | 3.84  | 20.79  | 13.39 | 49.85  |

Supplementary Note - Table 6

| Study                     | Trait                    | Men  |       |       |        |       |        | Women |       |       |        |       |        |
|---------------------------|--------------------------|------|-------|-------|--------|-------|--------|-------|-------|-------|--------|-------|--------|
|                           |                          | n    | mean  | SD    | median | min   | max    | n     | mean  | SD    | median | min   | max    |
| BWHHS                     | Weight (kg)              | 1646 | 83.98 | 13.09 | 82.95  | 47.50 | 168.10 | 1825  | 69.80 | 13.00 | 68.20  | 43.00 | 165.50 |
|                           | Height (m)               | 1646 | 1.77  | 0.07  | 1.77   | 1.58  | 2.00   | 1825  | 1.64  | 0.06  | 1.64   | 1.42  | 1.87   |
|                           | Age (yrs)                |      |       |       |        |       |        | 4269  | 68.89 | 5.51  | 69.00  | 59.00 | 80.00  |
|                           | BMI (kg/m <sup>2</sup> ) |      |       |       |        |       |        | 3941  | 27.61 | 5.01  | 26.86  | 15.25 | 58.83  |
|                           | Weight (kg)              |      |       |       |        |       |        | 3947  | 69.57 | 13.05 | 67.90  | 37.40 | 145.10 |
| DESIR                     | Height (m)               |      |       |       |        |       |        | 3942  | 1.59  | 0.06  | 1.59   | 1.35  | 2.00   |
|                           | Age (yrs)                | 2253 | 47.28 | 10.05 | 46.57  | 30.07 | 65.82  | 2283  | 47.33 | 10.03 | 46.91  | 30.13 | 65.50  |
|                           | BMI (kg/m <sup>2</sup> ) | 2253 | 25.46 | 3.36  | 25.10  | 16.70 | 45.40  | 2281  | 23.97 | 4.11  | 23.20  | 15.40 | 53.60  |
|                           | Weight (kg)              | 2253 | 75.91 | 10.93 | 75.00  | 46.00 | 140.00 | 2281  | 61.03 | 10.52 | 59.00  | 37.00 | 127.00 |
|                           | Height (m)               | 2253 | 1.73  | 0.07  | 1.72   | 1.50  | 1.96   | 2281  | 1.60  | 0.06  | 1.60   | 1.41  | 1.83   |
| DIAGEN                    | Age (yrs)                | 830  | 60.96 | 13.47 | 60.00  | 22.00 | 96.00  | 991   | 62.05 | 15.00 | 61.00  | 18.00 | 97.00  |
|                           | BMI (kg/m <sup>2</sup> ) | 830  | 27.66 | 4.00  | 27.05  | 18.94 | 44.64  | 991   | 27.99 | 6.00  | 26.98  | 15.63 | 61.71  |
|                           | Weight (kg)              | 830  | 84.73 | 13.96 | 83.00  | 50.00 | 137.00 | 991   | 74.00 | 16.98 | 71.00  | 40.00 | 182.00 |
|                           | Height (m)               | 830  | 1.75  | 0.07  | 1.75   | 1.50  | 1.96   | 991   | 1.62  | 0.07  | 1.62   | 1.41  | 1.92   |
| EGCUT                     | Age (yrs)                | 1891 | 42.97 | 18.43 | 41.00  | 18.00 | 101.00 | 1888  | 44.77 | 17.45 | 43.50  | 18.00 | 101.00 |
|                           | BMI (kg/m <sup>2</sup> ) | 1891 | 26.29 | 4.61  | 25.68  | 15.90 | 55.50  | 1888  | 26.18 | 5.60  | 25.12  | 11.51 | 53.15  |
|                           | Weight (kg)              | 1891 | 83.75 | 15.37 | 82.00  | 46.00 | 168.00 | 1888  | 71.33 | 15.24 | 69.00  | 28.00 | 150.00 |
|                           | Height (m)               | 1891 | 1.79  | 0.07  | 1.78   | 1.52  | 2.03   | 1888  | 1.65  | 0.06  | 1.65   | 1.40  | 1.90   |
| EPIC-Norfolk              | Age (yrs)                | 9084 | 59.08 | 9.30  | 59.00  | 39.00 | 79.00  | 9400  | 58.57 | 9.34  | 58.00  | 39.00 | 77.00  |
|                           | BMI (kg/m <sup>2</sup> ) | 9084 | 26.49 | 3.28  | 26.21  | 16.13 | 49.06  | 9400  | 26.15 | 4.23  | 25.49  | 15.23 | 58.69  |
|                           | Weight (kg)              | 9084 | 80.31 | 11.40 | 79.40  | 44.60 | 160.00 | 9400  | 67.75 | 11.64 | 66.00  | 36.00 | 139.20 |
|                           | Height (m)               | 9084 | 1.74  | 0.07  | 1.74   | 1.39  | 2.00   | 9400  | 1.61  | 0.06  | 1.61   | 1.29  | 2.00   |
| EPIC-Potsdam              | Age (yrs)                | 1981 | 51.80 | 8.10  | 52.00  | 24.00 | 69.00  | 3015  | 48.60 | 9.20  | 48.00  | 20.00 | 66.00  |
|                           | BMI (kg/m <sup>2</sup> ) | 1981 | 26.90 | 3.60  | 26.60  | 16.40 | 55.40  | 3015  | 25.80 | 4.80  | 24.90  | 17.20 | 58.70  |
|                           | Weight (kg)              | 1981 | 82.40 | 11.90 | 81.20  | 48.00 | 162.00 | 3015  | 68.60 | 13.00 | 66.40  | 44.20 | 149.70 |
|                           | Height (m)               | 1981 | 1.75  | 0.07  | 1.75   | 1.51  | 2.00   | 3015  | 1.63  | 0.06  | 1.63   | 1.41  | 1.88   |
| FINRISK                   | Age (yrs)                | 3902 | 49.92 | 13.57 | 50.00  | 25.00 | 74.00  | 3916  | 47.40 | 12.85 | 47.00  | 25.00 | 74.00  |
|                           | BMI (kg/m <sup>2</sup> ) | 3902 | 27.04 | 3.97  | 26.58  | 14.70 | 48.39  | 3916  | 26.31 | 5.01  | 25.45  | 14.69 | 53.28  |
|                           | Weight (kg)              | 3902 | 83.10 | 13.12 | 81.60  | 40.00 | 150.00 | 3916  | 69.27 | 13.17 | 67.15  | 37.10 | 137.80 |
|                           | Height (m)               | 3902 | 1.75  | 0.07  | 1.76   | 1.34  | 2.04   | 3916  | 1.62  | 0.06  | 1.62   | 1.39  | 1.92   |
| FUSION stage 2 - cases    | Age (yrs)                | 728  | 58.28 | 9.04  | 59.00  | 28.00 | 82.00  | 498   | 61.19 | 7.98  | 61.00  | 34.36 | 89.00  |
|                           | BMI (kg/m <sup>2</sup> ) | 728  | 30.20 | 5.03  | 29.70  | 19.40 | 52.97  | 498   | 31.60 | 5.79  | 30.86  | 17.85 | 53.45  |
|                           | Weight (kg)              | 728  | 92.48 | 17.20 | 90.00  | 42.20 | 167.00 | 498   | 81.23 | 16.10 | 78.90  | 48.00 | 143.50 |
|                           | Height (m)               | 728  | 1.75  | 0.07  | 1.75   | 1.39  | 1.96   | 498   | 1.60  | 0.06  | 1.60   | 1.41  | 1.80   |
| FUSION stage 2 - controls | Age (yrs)                | 1863 | 56.45 | 8.14  | 56.10  | 41.30 | 75.10  | 1833  | 57.23 | 8.31  | 56.80  | 40.99 | 75.20  |
|                           | BMI (kg/m <sup>2</sup> ) | 1863 | 26.81 | 3.94  | 26.40  | 15.78 | 93.00  | 1833  | 27.02 | 4.80  | 26.20  | 17.21 | 57.20  |
|                           | Weight (kg)              | 1863 | 82.27 | 12.92 | 81.00  | 46.50 | 146.60 | 1833  | 70.70 | 12.86 | 68.80  | 42.80 | 153.80 |
|                           | Height (m)               | 1863 | 1.75  | 0.06  | 1.75   | 1.53  | 1.95   | 1833  | 1.62  | 0.06  | 1.62   | 1.32  | 1.81   |
| HUNT                      | Age (yrs)                | 2387 | 63.64 | 14.44 | 67.00  | 20.00 | 97.00  | 2477  | 66.52 | 14.21 | 71.00  | 20.00 | 92.00  |
|                           | BMI (kg/m <sup>2</sup> ) | 2387 | 27.02 | 3.64  | 26.60  | 16.30 | 45.60  | 2477  | 28.15 | 5.09  | 27.60  | 14.70 | 48.50  |
|                           | Weight (kg)              | 2387 | 82.51 | 12.94 | 81.50  | 43.40 | 139.00 | 2477  | 72.77 | 13.88 | 71.50  | 31.00 | 135.00 |
|                           | Height (m)               | 2387 | 1.75  | 0.07  | 1.75   | 1.49  | 1.98   | 2477  | 1.61  | 0.06  | 1.61   | 1.37  | 1.84   |
| Inter99                   | Age (yrs)                | 3168 | 46.56 | 7.85  | 45.17  | 29.92 | 61.12  | 3342  | 45.82 | 8.00  | 45.06  | 29.69 | 61.35  |
|                           | BMI (kg/m <sup>2</sup> ) | 3168 | 26.82 | 4.02  | 26.33  | 16.73 | 56.90  | 3342  | 25.82 | 5.10  | 24.68  | 14.93 | 55.75  |
|                           | Weight (kg)              | 3168 | 85.73 | 14.11 | 84.00  | 53.00 | 183.00 | 3342  | 71.10 | 14.70 | 68.50  | 36.80 | 159.30 |
|                           | Height (cm)              | 3168 | 1.79  | 0.07  | 1.78   | 1.54  | 2.07   | 3342  | 1.65  | 0.06  | 1.66   | 1.29  | 1.88   |
| KORA 2                    | Age (yrs)                | 1867 | 49.56 | 14.17 | 50.00  | 25.00 | 74.00  | 1824  | 48.70 | 13.88 | 49.00  | 25.00 | 74.00  |
|                           | BMI (kg/m <sup>2</sup> ) | 1852 | 27.06 | 3.60  | 26.84  | 17.54 | 46.38  | 1796  | 26.18 | 4.77  | 25.39  | 16.81 | 50.50  |
|                           | Weight (kg)              | 1852 | 81.71 | 12.00 | 80.20  | 45.20 | 150.00 | 1796  | 67.87 | 12.09 | 66.20  | 37.50 | 122.90 |
|                           | Height (m)               | 1857 | 1.74  | 0.07  | 1.74   | 1.33  | 1.98   | 1817  | 1.61  | 0.07  | 1.61   | 1.34  | 1.88   |
| KORA 3                    | Age (yrs)                | 631  | 41.39 | 13.72 | 37.00  | 25.00 | 74.00  | 693   | 41.15 | 12.88 | 38.00  | 25.00 | 74.00  |
|                           | BMI (kg/m <sup>2</sup> ) | 626  | 26.59 | 3.43  | 26.21  | 17.59 | 40.99  | 678   | 25.26 | 4.74  | 24.17  | 16.89 | 49.31  |
|                           | Weight (kg)              | 626  | 82.42 | 11.52 | 81.20  | 52.30 | 132.00 | 678   | 66.83 | 12.26 | 64.20  | 43.60 | 125.20 |
|                           | Height (m)               | 630  | 1.76  | 0.07  | 1.76   | 1.55  | 2.00   | 690   | 1.63  | 0.06  | 1.63   | 1.42  | 1.80   |
| KORA 4                    | Age (yrs)                | 714  | 43.51 | 15.00 | 38.00  | 25.00 | 74.00  | 788   | 42.19 | 13.96 | 37.00  | 25.00 | 74.00  |
|                           | BMI (kg/m <sup>2</sup> ) | 711  | 26.80 | 3.61  | 26.44  | 16.32 | 42.37  | 775   | 26.01 | 5.05  | 25.33  | 15.84 | 49.15  |
|                           | Weight (kg)              | 711  | 83.12 | 11.64 | 82.40  | 52.30 | 136.50 | 775   | 68.97 | 13.32 | 67.10  | 41.10 | 137.00 |
|                           | Height (m)               | 714  | 1.76  | 0.07  | 1.76   | 1.55  | 1.96   | 783   | 1.63  | 0.07  | 1.63   | 1.39  | 1.89   |
| METSIM                    | Age (yrs)                | 7127 | 57.60 | 6.90  | 57.00  | 45.00 | 73.00  |       |       |       |        |       |        |
|                           | BMI (kg/m <sup>2</sup> ) | 7127 | 27.25 | 4.16  | 26.67  | 16.18 | 55.54  |       |       |       |        |       |        |
|                           | Weight (kg)              | 7127 | 84.33 | 13.98 | 82.50  | 43.00 | 174.00 |       |       |       |        |       |        |
|                           | Height (m)               | 7127 | 1.76  | 0.06  | 1.76   | 1.47  | 2.03   |       |       |       |        |       |        |
| OBB                       | Age (yrs)                | 745  | 41.10 | 5.50  | 42.00  | 29.00 | 53.00  | 724   | 41.30 | 6.30  | 41.00  | 30.00 | 53.00  |
|                           | BMI (kg/m <sup>2</sup> ) | 745  | 26.70 | 3.90  | 26.20  | 15.30 | 46.20  | 724   | 26.70 | 3.90  | 26.20  | 15.30 | 46.20  |
|                           | Weight (kg)              | 745  | 84.80 | 13.80 | 83.10  | 44.70 | 172.10 | 724   | 69.20 | 13.10 | 66.50  | 43.50 | 127.90 |
|                           | Height (m)               | 745  | 1.78  | 0.07  | 1.78   | 1.50  | 2.03   | 724   | 1.65  | 0.07  | 1.65   | 0.83  | 1.82   |

\*Includes individuals <18 years of age (BHS: n=3 (17.3, 17.6, and 17.6 years); HYPERGENES - cases: n=2 (17.6 and 17.8 years))

## Supplementary Note

**Supplementary Note - Table 7** Study design, number of individuals and sample quality control for studies used in extreme obesity case-control analyses, childhood BMI analyses, family-based analyses and polygenes analyses.

Supplementary Note - Table 7

Supplementary Note - Table 7 -- Study design, number of individuals and sample quality control for studies used in extreme obesity case-control analyses, childhood BMI analyses, family-based analyses and polygenes analyses.

| Study                                            |                                                                                                                                                     | Study design                               | Total sample size (N)                     | Call rate* | Sample QC                  | Samples in analyses (N)**                                                                                                                                | Anthropometric assessment method                  | References              |                                                                                                                                                                                                                                                                                                                                                                                                                                                                                                                                                                      |
|--------------------------------------------------|-----------------------------------------------------------------------------------------------------------------------------------------------------|--------------------------------------------|-------------------------------------------|------------|----------------------------|----------------------------------------------------------------------------------------------------------------------------------------------------------|---------------------------------------------------|-------------------------|----------------------------------------------------------------------------------------------------------------------------------------------------------------------------------------------------------------------------------------------------------------------------------------------------------------------------------------------------------------------------------------------------------------------------------------------------------------------------------------------------------------------------------------------------------------------|
| Short name                                       | Full name                                                                                                                                           |                                            |                                           |            | Study specific QC criteria |                                                                                                                                                          |                                                   |                         |                                                                                                                                                                                                                                                                                                                                                                                                                                                                                                                                                                      |
| <b>In silico follow-up studies</b>               |                                                                                                                                                     |                                            |                                           |            |                            |                                                                                                                                                          |                                                   |                         |                                                                                                                                                                                                                                                                                                                                                                                                                                                                                                                                                                      |
| Essen Obesity Study (Essen Case-Control GWAS)    | --                                                                                                                                                  | Case-Control                               | children and adolescents                  | 888        | ≥ 95%                      | 1) related individuals and duplicates;<br>2) Missing BMI and age.                                                                                        | 888                                               | measured                | [PMID: 18159244] Hinney, A. et al. Genome wide association (GWA) study for early onset extreme obesity supports the role of fat mass and obesity associated gene (FTO) variants. PLoS One 26,2(12):e1361 (2007).                                                                                                                                                                                                                                                                                                                                                     |
| Essen Obesity Study (Essen Obesity Trio GWAS)    | --                                                                                                                                                  | Family-based (TDT)                         | trios with obese children and adolescents | 1,334      | ≥ 95%                      | 1) Mendelian inconsistencies per family >5%;<br>2) duplicates;<br>3) Missing BMI and age in offspring.                                                   | 1,272 (848 parents, 424 children and adolescents) | measured                | [PMID: 12970296] Hinney A, Hohmann S, Geller F, Vogel C, Hess C, Wermter AK, Brokamp B, Goldschmidt H, Siegfried W, Remschmidt H, Schäfer H, Gudermann T, Hebebrand J. Melanocortin-4 receptor gene: case-control study and transmission disequilibrium test confirm that functionally relevant mutations are compatible with a major gene effect for extreme obesity. J Clin Endocrinol Metab.; 88(9):4258-67 (2003).                                                                                                                                               |
| French obese CC- adults                          | French obese CC- adults                                                                                                                             | Case control study                         | adults                                    | 1,473      | ≥ 95%                      | 1. ethnic outliers<br>2. related individuals                                                                                                             | 1,380                                             | measured                | [PMID: 19151714] Meyre D et al. Genome-wide association study for early-onset and morbid adult obesity identifies three new risk loci in European populations. Nat Genet.;41(2):139-40 (2009).                                                                                                                                                                                                                                                                                                                                                                       |
| French obese CC - youth                          | French obese CC - young                                                                                                                             | Case control study                         | children and adolescents                  | 1,396      | ≥ 95%                      | 1. ethnic outliers<br>2. related individuals                                                                                                             | 1301                                              | measured                | [PMID: 19151714] Meyre D et al. Genome-wide association study for early-onset and morbid adult obesity identifies three new risk loci in European populations. Nat Genet.;41(2):139-40 (2009).                                                                                                                                                                                                                                                                                                                                                                       |
| GINI/LISA                                        | German Infant Nutritional Intervention / Influences of Lifestyle related Factors on the Immune System and the Development of Allergies in Childhood | Population-based                           | children                                  | 396        | ≥ 95%                      | 1) Missing body weight and height<br>2) check for related individuals and duplicates                                                                     | 355                                               | medical records         | [PMID: 16452359] Zutavern A, Brockow I, Schaaf B, Bolte G, von Berg A, Diez U, Borte M, Herbarth O, Wichmann HE, Heinrich J. Timing of solid food introduction in relation to atopic dermatitis and atopic sensitization: results from a prospective birth cohort study. Pediatrics 2006; 117:401-411.<br>[PMID: 19521784] Rzehak P, Sausenthaler S, Koletzko S, Bauer CP, Schaaf B, von Berg A et al. Period-specific growth, overweight and modification by breastfeeding in the GINI and LISA birth cohorts up to age 6 years. Eur J Epidemiol; 24:449-67 (2009). |
| SCOOP-UK                                         | Severe Childhood Onset Obesity Project UK                                                                                                           | Case series                                | children and adolescents                  | 1,012      | ≥ 95%                      | 1) heterozygosity <26% or >28%;<br>2) discrepancy with external identifying information;<br>3) ethnic outliers;<br>4) related individuals and duplicates | 943                                               | measured                | [PMID: 19966786] Bochukova EG et al. Large, rare chromosomal deletions associated with severe early-onset obesity. Nature 463, 666-70 (2010)                                                                                                                                                                                                                                                                                                                                                                                                                         |
| QIMR                                             | Twin study at Queensland Institute of Medical Research                                                                                              | Population-based                           | Adults (Polygenes)                        | 3,038      | ≥ 95%                      | 1) close relatives based on pedigree information;<br>2) ethnic outliers;<br>3) Missing BMI.                                                              | 1,787                                             | measured or self-report | [PMID: 19896111] Medland et al. Common Variants in the Trichohyalin Gene Are Associated with Straight Hair in Europeans. Am. J. Human Genet. 85(5):750-5 (2009).                                                                                                                                                                                                                                                                                                                                                                                                     |
| <b>De novo follow-up studies</b>                 |                                                                                                                                                     |                                            |                                           |            |                            |                                                                                                                                                          |                                                   |                         |                                                                                                                                                                                                                                                                                                                                                                                                                                                                                                                                                                      |
| Berlin school girls (BESCS)/Berlin obese (BEPOC) | Berlin School Children's Study/Berlin Paediatric Obese Cohort                                                                                       | Population-based (enriched for overweight) | children and adolescents                  | 2,785      | N/A                        | 1. Missing phenotypes<br>2. Missing DNA                                                                                                                  | 2,723                                             | measured                | [PMID: 18974233.] Bau, A.M. et al. Is there a further acceleration in the age at onset of menarche? A cross-sectional study in 1840 school children focusing on age and bodyweight at the onset of menarche. Eur J Endocrinol. 160(1):107-113. (2009)                                                                                                                                                                                                                                                                                                                |



Supplementary Note - Table 7

| Study                                     |                                                                                                                                                     | Study design         |                                           | Total sample size (N)                                | Call rate* | Sample QC<br>Study specific QC criteria                                    | Samples in analyses (N)**                       | Anthropometric assessment method | References                                                                                                                                                                                                                                                                                                                                                                |
|-------------------------------------------|-----------------------------------------------------------------------------------------------------------------------------------------------------|----------------------|-------------------------------------------|------------------------------------------------------|------------|----------------------------------------------------------------------------|-------------------------------------------------|----------------------------------|---------------------------------------------------------------------------------------------------------------------------------------------------------------------------------------------------------------------------------------------------------------------------------------------------------------------------------------------------------------------------|
| Short name                                | Full name                                                                                                                                           |                      |                                           |                                                      |            |                                                                            |                                                 |                                  |                                                                                                                                                                                                                                                                                                                                                                           |
| Datteln (DAPOC)                           | Datteln Paediatric Obese Cohort                                                                                                                     | Overweight and obese | children and adolescents                  | 736                                                  | N/A        | 1. Missing phenotypes<br>2. Missing DNA                                    | 692                                             | measured                         | [PMID: 17517246] Reinehr T, Hinney A, de Sousa G, Austrup F, Hebebrand J, Andler W. Definable somatic disorders in overweight children and adolescents. <i>J Pediatr.</i> ; 150(6):618-22, 622.e1-5.T (2007).                                                                                                                                                             |
| Essen/Marburg - obese adults              | --                                                                                                                                                  | Obese                | adults                                    | 1,411                                                | N/A        | 1. Missing phenotypes<br>2. Missing DNA                                    | 1,024                                           | measured                         | [PMID: 16492696] Hinney, A. et al. Prevalence, spectrum, and functional characterization of melanocortin-4 receptor gene mutations in a representative population-based sample and obese adults from Germany. <i>J Clin Endocrinol Metab</i> 91, 1761-1769 (2006).                                                                                                        |
| Essen Obesity Trios (independent of GWAS) | --                                                                                                                                                  | Family-based (TDT)   | trios with obese children and adolescents | 1,101 (748 parents and 353 children and adolescents) | N/A        | 1. Missing phenotypes<br>2. Missing DNA,<br>3. Incomplete trio             | 942 (628 parents, 314 children and adolescents) | measured                         | [PMID: 18398438] Wermter, A.K. et al. Preferential reciprocal transfer of paternal/maternal DLK1 alleles to obese children: first evidence of polar overdominance in humans. <i>Eur J Hum Genet</i> 16(9), 1126-1134 (2008).                                                                                                                                              |
| GINI/LISA                                 | German Infant Nutritional Intervention / Influences of Lifestyle related Factors on the Immune System and the Development of Allergies in Childhood | Population-based     | children and adolescents                  | 2,151                                                | N/A        | 1. Missing phenotypes<br>2. Missing DNA                                    | 1,969                                           | measured                         | [PMID: 17889067] Filipiak, B. et al. Solid food introduction in relation to eczema: results from a four-year prospective birth cohort study. <i>J Pediatr</i> 151, 352-358 (2007)<br>[PMID 17399781] Chen, C.M. et al. Longitudinal study on cat allergen exposure and the development of allergy in young children. <i>J Allergy Clin Immunol</i> 119, 1148-1155 (2007). |
| NFBC-1986                                 | Northern Finland Birth Cohorts born in 1985-1986                                                                                                    | Population-based     | 16 year olds                              | 9,479                                                | N/A        | 1. Missing DNA<br>2. Missing phenotypes<br>3. Non Caucasians<br>4. Related | 5,370                                           | measured                         | [PMID: 7485065] Olsen P, Laara E, Rantakallio P, Jarvelin MR, Sarpola A, Hartikainen AL. Epidemiology of preterm delivery in two birth cohorts with an interval of 20 years. <i>Am J Epidemiol</i> ;142(11):1184-93, (1995).                                                                                                                                              |
| USCS                                      | Ulm School Children Study                                                                                                                           | Population-based     | children and adolescents                  | 1,478                                                | N/A        | 1. Missing phenotypes<br>2. Missing DNA                                    | 924                                             | measured                         | [PMID: 19562371] Nagel, G. et al. Determinants of obesity in the Ulm Research on Metabolism, Exercise and Lifestyle in Children (URMEL-ICE). <i>Eur J Pediatr</i> 168(10):1259-1267 (2009).                                                                                                                                                                               |

\*Sample genotyping success rate; i.e. percentage of successfully genotyped SNPs per sample

\*\*Ns reported are numbers of individuals association data was provided for; Ns in paper may vary due to effective sample size used in meta-analyses

## Supplementary Note

**Supplementary Note - Table 8** Supplementary Note - Table 8 -- Information on genotyping methods, quality control of SNPs, imputation, and statistical analysis for studies used in extreme obesity case-control analyses, childhood BMI analyses, family-based analyses and polygenes analyses.

**Supplementary Note - Table 8 -- Information on genotyping methods, quality control of SNPs, imputation, and statistical analysis for studies used in extreme obesity case-control analyses, childhood BMI analyses, family-based analyses and polygenes analyses.**

| Study                                            | Platform                                        | Genotyping                 |                                 |                                                                      |                    |           | SNPs that met QC criteria | Imputation software | Imputation         |                    | Association analyses |                       |
|--------------------------------------------------|-------------------------------------------------|----------------------------|---------------------------------|----------------------------------------------------------------------|--------------------|-----------|---------------------------|---------------------|--------------------|--------------------|----------------------|-----------------------|
|                                                  |                                                 | Genotype calling algorithm | MAF                             | Inclusion criteria                                                   | Call rate*         | p for HWE |                           |                     | MAF                | Inclusion criteria | Imputation quality** | SNPs in meta-analysis |
| <b><i>In silico</i> follow-up studies</b>        |                                                 |                            |                                 |                                                                      |                    |           |                           |                     |                    |                    |                      |                       |
| Essen Obesity Study (Essen Case-Control GWAS)    | Genome-Wide Human SNP Array 6.0 from Affymetrix | Birdseed                   | ≥ 1%                            | ≥ 95%                                                                | > 0.001            | 730,577   | Beagle                    | ≥1%                 | none               | 675                | SNPtest              |                       |
| Essen Obesity Study (Essen Obesity Trio GWAS)    | Genome-Wide Human SNP Array 6.0 from Affymetrix | Birdseed                   | ≥ 1%                            | ≥ 95%                                                                | > 0.001            | 749,179   | Beagle                    | ≥1%                 | none               | 675                | PLINK                |                       |
| French obese CC- adults                          | Illumina Chip 370 duo                           | Illumina clustering        | none                            | ≥ 95%                                                                | > 10 <sup>-4</sup> | 112       | IMPUTE                    | ≥ 1%                | proper-info ≥ 0.40 | 663                | SNPtest              |                       |
| French obese CC - young                          | Illumina Chip 370 duo                           | Illumina clustering        | none                            | ≥ 95%                                                                | > 10 <sup>-4</sup> | 114       | IMPUTE                    | ≥ 1%                | proper-info ≥ 0.40 | 662                | SNPtest              |                       |
| GINA/LISA                                        | Affymetrix Human SNP Array 5.0                  | BRLMM-P                    | 0.01                            | 0.95                                                                 | 0.01               | 371,004   | IMPUTE                    | none                | none               | 668                | SNPtest              |                       |
| SCOOP-UK (cases)                                 | Affymetrix 6.0                                  | Birdsuite versior          | ≥ 1%                            | ≥ 95% if MAF ≥ 5%; ≥ 97% if 2% ≤ MAF < 5%;<br>≥ 99% if 1% ≤ MAF < 2% | > 10 <sup>-4</sup> | 722,714   | IMPUTE                    | ≥1%                 | proper-info ≥ 0.40 | 24                 | SNPtest              |                       |
| QIMR                                             | Illumina HumanHap 610 Quad                      | BeadStudio                 | ≥ 1%                            | ≥ 95%                                                                | > 10 <sup>-6</sup> | 515,961   | MACH                      | ≥ 1%                | r2_hat ≥ 0.30      |                    |                      |                       |
| <b><i>De novo</i> follow-up studies</b>          |                                                 |                            |                                 |                                                                      |                    |           |                           |                     |                    |                    |                      |                       |
| Study                                            | Platform                                        | Call rate*                 | Concordance rate for duplicates | p for HWE                                                            | Analysis software  |           |                           |                     |                    |                    |                      |                       |
| Berlin school girls (BESCS)/Berlin obese (BEPOC) | Sequenom MALDI-TOF MS; iPLEX™                   | ≥ 90%                      | ≥ 97%                           | > 10 <sup>-6</sup>                                                   | SAS and R          |           |                           |                     |                    |                    |                      |                       |
| Datteln (DAPOC)                                  | Sequenom MALDI-TOF MS; iPLEX™                   | ≥ 95%                      | ≥ 97%                           | > 10 <sup>-6</sup>                                                   | SAS and R          |           |                           |                     |                    |                    |                      |                       |
| Essen/Marburg - obese adults                     | Sequenom MALDI-TOF MS; iPLEX™                   | ≥ 95%                      | ≥ 97%                           | > 10 <sup>-6</sup>                                                   | SAS and R          |           |                           |                     |                    |                    |                      |                       |
| Essen Obesity Trios (independent of GWAS)        | Sequenom MALDI-TOF MS; iPLEX™                   | ≥ 95%                      | ≥ 97%                           | > 10 <sup>-6</sup>                                                   | SAS and R          |           |                           |                     |                    |                    |                      |                       |
| GINI/LISA                                        | Sequenom MALDI-TOF MS; iPLEX™                   | ≥ 95%                      | ≥ 97%                           | > 10 <sup>-6</sup>                                                   | SAS and R          |           |                           |                     |                    |                    |                      |                       |
| NFBC-1986                                        | SNPlex                                          | ≥ 95%                      | none                            | ≥ 10 <sup>-6</sup>                                                   | R                  |           |                           |                     |                    |                    |                      |                       |
| USCS                                             | Sequenom MALDI-TOF MS; iPLEX™                   | ≥ 95%                      | ≥ 97%                           | > 10 <sup>-6</sup>                                                   | SAS and R          |           |                           |                     |                    |                    |                      |                       |

\*Sample genotyping success rate; i.e. percentage of successfully genotyped SNPs per sample

\*\*SNPtest calculates the 'proper\_info' statistic as a measure of the relative statistical information about the additive genetic effect being estimated. The proper\_info statistic has a direct relationship to the power of the test and ranges from 0 to 1, with 1 indicating perfect information. MACH calculates the 'rsq\_hat', which is the r2 between each imputed genotype and its true underlying genotype. Rsq\_hat ranges from 0 to 1, with 1 indicating perfect imputation.

## Supplementary Note

**Supplementary Note - Table 9** Study-specific descriptive statistics for studies used in extreme obesity case-control analyses, childhood BMI analyses, family-based analyses and polygenes analyses.

Supplementary Note - Table 9 -- Study-specific descriptive statistics for studies used in extreme obesity case-control analyses, childhood BMI analyses, family-based analyses and polygenes analyses.

| Study                                                   | Trait                    | Men  |        |       |        |       |        | Women |        |       |        |       |        |
|---------------------------------------------------------|--------------------------|------|--------|-------|--------|-------|--------|-------|--------|-------|--------|-------|--------|
|                                                         |                          | n    | mean   | SD    | median | min   | max    | n     | mean   | SD    | median | min   | max    |
| <b>In silico follow-up studies</b>                      |                          |      |        |       |        |       |        |       |        |       |        |       |        |
| Essen Obesity Study (Essen Case-Control GWAS) Cases     | Age (yrs)                | 192  | 14.18  | 3.85  | 13.96  | 3.37  | 39.18  | 261   | 0.40   | 3.67  | 14.31  | 5.62  | 24.42  |
|                                                         | BMI (kg/m <sup>2</sup> ) | 192  | 33.11  | 6.48  | 32.34  | 21.88 | 56.86  | 261   | 1.00   | 6.84  | 32.33  | 20.35 | 61.88  |
|                                                         | Weight (kg)              | 190  | 92.81  | 29.19 | 89.45  | 24.90 | 186.20 | 260   | 0.89   | 24.58 | 87.80  | 25.80 | 176.00 |
|                                                         | Height (m)               | 190  | 1.66   | 0.15  | 1.68   | 1.00  | 1.94   | 260   | 0.47   | 0.13  | 1.63   | 1.12  | 1.82   |
| Essen Obesity Study (Essen Case-Control GWAS) Controls  | Age (yrs)                | 171  | 25.38  | 4.57  | 24.71  | 16.88 | 46.32  | 264   | 0.20   | 6.37  | 24.51  | 17.26 | 58.78  |
|                                                         | BMI (kg/m <sup>2</sup> ) | 171  | 18.86  | 0.94  | 18.95  | 16.29 | 21.80  | 264   | 1.00   | 0.95  | 17.69  | 13.22 | 19.78  |
|                                                         | Weight (kg)              | 171  | 63.64  | 6.12  | 63.40  | 46.50 | 83.10  | 264   | 50.53  | 4.61  | 50.50  | 38.40 | 64.50  |
|                                                         | Height (m)               | 171  | 1.84   | 0.07  | 1.83   | 1.64  | 2.04   | 264   | 1.69   | 0.07  | 1.74   | 1.50  | 1.89   |
| Essen Obesity Study (Essen Obesity Trio GWAS) Parents   | Age (yrs)                | 421  | 44.02  | 6.23  | 43.06  | 29.85 | 63.21  | 422   | 40.62  | 5.40  | 40.19  | 24.71 | 62.03  |
|                                                         | BMI (kg/m <sup>2</sup> ) | 424  | 30.22  | 5.36  | 29.61  | 18.04 | 54.33  | 424   | 30.58  | 7.36  | 29.33  | 17.15 | 64.34  |
|                                                         | Weight (kg)              | 424  | 94.72  | 18.01 | 92.00  | 58.00 | 160.00 | 424   | 83.03  | 20.29 | 79.00  | 48.00 | 170.10 |
|                                                         | Height (m)               | 424  | 1.77   | 0.07  | 1.77   | 1.54  | 1.99   | 424   | 1.64   | 0.07  | 1.64   | 1.00  | 1.80   |
| Essen Obesity Study (Essen Obesity Trio GWAS) Offspring | Age (yrs)                | 200  | 13.00  | 2.72  | 13.46  | 5.14  | 19.47  | 224   | 13.38  | 2.86  | 13.52  | 4.96  | 20.54  |
|                                                         | BMI (kg/m <sup>2</sup> ) | 200  | 31.52  | 4.87  | 30.89  | 21.92 | 64.70  | 224   | 32.30  | 5.80  | 31.20  | 19.73 | 56.17  |
|                                                         | Weight (kg)              | 198  | 85.05  | 24.24 | 84.85  | 31.00 | 214.30 | 223   | 83.91  | 21.88 | 83.60  | 26.00 | 174.00 |
|                                                         | Height (m)               | 198  | 1.63   | 0.15  | 1.65   | 1.13  | 1.93   | 223   | 1.60   | 0.12  | 1.63   | 1.14  | 1.84   |
| French obese (adults) Cases                             | Age (yrs)                | 143  | 44.90  | 11.64 | 46.00  | 16.00 | 75.00  | 521   | 43.87  | 12.07 | 44.00  | 15.00 | 77.00  |
|                                                         | BMI (kg/m <sup>2</sup> ) | 143  | 48.28  | 8.65  | 45.75  | 36.36 | 83.86  | 521   | 47.17  | 7.19  | 45.44  | 31.61 | 87.24  |
|                                                         | Weight (kg)              | 143  | 149.45 | 29.20 | 142.50 | 99.00 | 270.00 | 521   | 123.82 | 21.63 | 120.00 | 74.00 | 231.80 |
|                                                         | Height (m)               | 143  | 1.76   | 0.07  | 1.76   | 1.55  | 1.95   | 521   | 1.62   | 0.07  | 1.62   | 1.43  | 1.80   |
| French obese (adults) Controls                          | Age (yrs)                | 178  | 53.10  | 5.59  | 52.65  | 45.04 | 64.96  | 538   | 49.52  | 8.53  | 49.80  | 30.25 | 65.02  |
|                                                         | BMI (kg/m <sup>2</sup> ) | 178  | 23.15  | 1.16  | 23.30  | 20.40 | 24.90  | 538   | 21.36  | 1.85  | 21.20  | 16.60 | 24.90  |
|                                                         | Weight (kg)              | 178  | 69.47  | 6.49  | 70.00  | 51.00 | 89.00  | 538   | 54.84  | 5.86  | 55.00  | 40.00 | 71.00  |
|                                                         | Height (m)               | 178  | 1.73   | 0.06  | 1.73   | 1.56  | 1.95   | 538   | 1.60   | 0.06  | 1.60   | 1.45  | 1.77   |
| French obese (young) Cases                              | Age (yrs)                | 300  | 11.10  | 2.99  | 11.00  | 3.08  | 17.00  | 370   | 10.75  | 3.47  | 11.00  | 2.00  | 17.00  |
|                                                         | BMI (kg/m <sup>2</sup> ) | 300  | 29.70  | 6.24  | 28.27  | 19.20 | 69.36  | 370   | 29.40  | 6.65  | 28.15  | 18.67 | 54.36  |
|                                                         | Weight (kg)              | 299  | 73.26  | 28.05 | 65.99  | 21.00 | 209.99 | 366   | 68.21  | 26.95 | 64.98  | 18.49 | 150.00 |
|                                                         | Height (m)               | 299  | 1.54   | 0.16  | 1.53   | 1.00  | 1.97   | 366   | 1.49   | 0.17  | 1.53   | 0.92  | 1.83   |
| French obese (young) Controls                           | Age (yrs)                | 309  | 11.89  | 2.37  | 11.83  | 6.08  | 17.08  | 322   | 11.93  | 2.21  | 11.92  | 5.92  | 17.17  |
|                                                         | BMI (kg/m <sup>2</sup> ) | 309  | 17.49  | 2.21  | 17.30  | 12.82 | 24.46  | 322   | 17.67  | 2.50  | 17.51  | 12.00 | 25.99  |
|                                                         | Weight (kg)              | 309  | 40.44  | 12.34 | 37.60  | 19.60 | 79.20  | 322   | 40.07  | 10.59 | 39.40  | 19.20 | 69.60  |
|                                                         | Height (m)               | 309  | 1.50   | 0.15  | 1.48   | 1.16  | 1.84   | 322   | 1.49   | 0.13  | 1.50   | 1.15  | 1.78   |
| GINA/LISA                                               | Age (yrs)                | 179  | 5.18   | 0.34  | 5.22   | 4.20  | 5.89   | 176   | 5.14   | 0.35  | 5.20   | 4.12  | 5.90   |
|                                                         | BMI (kg/m <sup>2</sup> ) | 179  | 15.16  | 1.34  | 15.15  | 11.78 | 20.83  | 176   | 15.30  | 1.37  | 15.14  | 11.96 | 22.84  |
|                                                         | Weight (kg)              | 179  | 19.65  | 2.57  | 20.00  | 14.00 | 29.00  | 176   | 19.95  | 2.64  | 20.00  | 15.00 | 34.00  |
|                                                         | Height (m)               | 179  | 1.14   | 0.05  | 1.14   | 0.99  | 1.25   | 176   | 1.14   | 0.04  | 1.14   | 1.02  | 1.24   |
| SCOOP-UK cases                                          | Age (yrs)                | 383  | 11.06  | 5.85  | 11.70  | 0.60  | 52.19  | 559   | 11.50  | 7.45  | 11.04  | 0.55  | 56.35  |
|                                                         | BMI (kg/m <sup>2</sup> ) | 380  | 34.23  | 8.91  | 32.73  | 21.06 | 89.62  | 551   | 34.17  | 9.59  | 32.40  | 17.07 | 96.38  |
|                                                         | Weight (kg)              | 380  | 81.10  | 41.50 | 78.45  | 11.70 | 259.00 | 553   | 76.56  | 38.75 | 73.00  | 10.59 | 213.00 |
|                                                         | Height (m)               | 380  | 147.97 | 25.75 | 153.40 | 70.40 | 199.60 | 552   | 143.69 | 23.80 | 150.40 | 67.50 | 192.90 |
| QIMR                                                    | Age (yrs)                | 294  | 39.54  | 13.25 | 38.00  | 18.00 | 79.00  | 706   | 38.11  | 13.03 | 34.00  | 18.00 | 84.00  |
|                                                         | Height (m)               | 294  | 1.79   | 0.07  | 1.79   | 1.60  | 2.01   | 706   | 1.64   | 0.07  | 1.64   | 1.44  | 1.93   |
|                                                         | Weight (kg)              | 294  | 82.60  | 14.24 | 80.87  | 47.00 | 150.00 | 706   | 65.38  | 13.26 | 63.00  | 34.02 | 140.00 |
|                                                         | BMI (kg/m <sup>2</sup> ) | 294  | 25.78  | 4.26  | 25.25  | 14.83 | 55.03  | 706   | 24.36  | 4.61  | 23.42  | 14.17 | 45.11  |
| <b>De novo follow-up studies</b>                        |                          |      |        |       |        |       |        |       |        |       |        |       |        |
| Berlin school girls (BESCS)/Berlin obese (BEPOC)        | Age (yrs)                | 507  | 11.32  | 3.35  | 11.80  | 1.57  | 17.87  | 2216  | 12.19  | 2.35  | 12.71  | 0.81  | 17.61  |
|                                                         | BMI (kg/m <sup>2</sup> ) | 507  | 29.77  | 5.69  | 29.02  | 18.54 | 58.43  | 2216  | 21.95  | 5.84  | 20.34  | 12.50 | 55.37  |
|                                                         | Weight (kg)              | 507  | 73.51  | 28.27 | 71.00  | 16.00 | 187.00 | 2216  | 52.87  | 18.19 | 49.00  | 16.00 | 164.00 |
|                                                         | Height (m)               | 507  | 1.54   | 0.20  | 1.56   | 0.83  | 2.02   | 2216  | 1.55   | 0.12  | 1.57   | 1.02  | 1.90   |
| Datteln (DAPOC)                                         | Age (yrs)                | 305  | 10.65  | 2.60  | 10.90  | 0.90  | 17.70  | 387   | 10.75  | 2.84  | 10.90  | 2.90  | 17.10  |
|                                                         | BMI (kg/m <sup>2</sup> ) | 305  | 27.58  | 4.62  | 26.87  | 18.53 | 50.77  | 387   | 27.33  | 5.22  | 26.56  | 18.47 | 52.72  |
|                                                         | Weight (kg)              | 305  | 64.00  | 20.58 | 61.70  | 13.60 | 144.20 | 387   | 62.90  | 21.48 | 60.50  | 22.80 | 138.70 |
|                                                         | Height (m)               | 305  | 1.50   | 0.15  | 1.50   | 0.75  | 1.83   | 387   | 1.49   | 0.16  | 1.51   | 1.01  | 1.82   |
| Essen/Marburg - obese adults                            | Age (yrs)                | 375  | 46.66  | 14.28 | 46.00  | 18.00 | 83.00  | 649   | 46.03  | 15.05 | 45.00  | 18.00 | 83.00  |
|                                                         | BMI (kg/m <sup>2</sup> ) | 375  | 34.94  | 4.75  | 33.52  | 29.04 | 63.27  | 649   | 36.28  | 5.71  | 34.72  | 27.99 | 65.58  |
|                                                         | Weight (kg)              | 375  | 110.73 | 17.25 | 108.00 | 77.00 | 192.00 | 649   | 98.62  | 17.12 | 95.00  | 58.00 | 179.00 |
|                                                         | Height (m)               | 375  | 1.78   | 0.07  | 1.77   | 1.60  | 2.01   | 649   | 1.65   | 0.07  | 1.65   | 1.35  | 1.84   |
| Essen Obesity Trios (offspring)                         | Age (yrs)                | 148  | 13.72  | 3.21  | 13.40  | 4.19  | 24.90  | 205   | 13.67  | 3.29  | 14.00  | 3.76  | 22.18  |
|                                                         | BMI (kg/m <sup>2</sup> ) | 148  | 32.19  | 6.46  | 31.15  | 18.74 | 58.86  | 205   | 32.68  | 6.41  | 31.47  | 22.31 | 56.75  |
|                                                         | Weight (kg)              | 147  | 89.80  | 27.67 | 86.50  | 21.30 | 170.00 | 203   | 86.23  | 25.18 | 85.00  | 26.10 | 173.80 |
|                                                         | Height (m)               | 148  | 1.65   | 0.15  | 1.67   | 1.06  | 1.95   | 205   | 1.60   | 0.14  | 1.63   | 1.06  | 1.83   |
| GINI/LISA                                               | Age (yrs)                | 1010 | 5.22   | 0.17  | 5.20   | 4.84  | 5.83   | 959   | 5.22   | 0.17  | 5.20   | 4.87  | 5.78   |
|                                                         | BMI (kg/m <sup>2</sup> ) | 1010 | 15.40  | 1.34  | 15.27  | 11.98 | 24.72  | 959   | 15.37  | 1.36  | 15.26  | 11.89 | 21.95  |
|                                                         | Weight (kg)              | 1010 | 19.96  | 2.57  | 19.85  | 13.80 | 35.00  | 959   | 19.59  | 2.56  | 19.40  | 13.00 | 34.30  |
|                                                         | Height (m)               | 1010 | 1.13   | 0.05  | 1.17   | 0.99  | 1.28   | 959   | 1.13   | 0.05  | 1.13   | 0.99  | 1.26   |
| NFBC-1986                                               | Age (yrs)                | 2642 | 16.00  | NA    | 16.00  | 16.00 | 16.00  | 2728  | 16.00  | NA    | 16.00  | 16.00 | 16.00  |
|                                                         | BMI (kg/m <sup>2</sup> ) | 2634 | 21.54  | 3.98  | 20.77  | 11.07 | 44.66  | 2718  | 21.00  | 3.57  | 20.46  | 10.36 | 46.94  |
|                                                         | Weight (kg)              | 2637 | 64.92  | 12.70 | 62.60  | 35.10 | 140.60 | 2721  | 57.23  | 9.90  | 55.40  | 34.70 | 123.20 |
|                                                         | Height (m)               | 2634 | 1.74   | 0.08  | 1.74   | 1.46  | 1.98   | 2719  | 1.65   | 0.07  | 1.65   | 1.32  | 1.98   |
| USCS                                                    | Age (yrs)                | 489  | 8.70   | 3.18  | 7.69   | 6.54  | 31.00  | 435   | 9.00   | 3.28  | 7.67   | 6.25  | 27.00  |
|                                                         | BMI (kg/m <sup>2</sup> ) | 489  | 19.77  | 9.55  | 16.14  | 12.75 | 87.10  | 435   | 20.72  | 10.59 | 16.12  | 11.90 | 73.20  |
|                                                         | Weight (kg)              | 489  | 40.76  | 37.97 | 27.00  | 15.40 | 261.00 | 435   | 42.25  | 35.96 | 26.30  | 16.40 | 187.40 |
|                                                         | Height (m)               | 489  | 1.34   | 0.18  | 1.29   | 1.09  | 1.99   | 435   | 1.34   | 0.17  | 1.28   | 1.09  | 1.84   |

## Supplementary Note

**Supplementary Note - Table 10** Nominally significant interactions ( $P_{\text{interaction}} < 0.05$ ) for all pairwise tests between the lead SNPs at the 32 confirmed BMI loci. The results are not significant after correcting for multiple testing.

## Supplementary Note - Table 10

**Supplementary Note - Table 10 -- Nominally significant interactions ( $P_{interaction} < 0.05$ ) for all pairwise tests between the lead SNPs at the 32 confirmed BMI loci. The results are not significant after correcting for multiple testing.**

| Markers    |            | Pairwise interaction | Interaction P |
|------------|------------|----------------------|---------------|
| SNP 1      | SNP 2      | beta (SE)            |               |
| rs2287019  | rs2890652  | 0.038 (0.012)        | 1.79E-03      |
| rs13107325 | rs29941    | -0.048 (0.016)       | 2.64E-03      |
| rs2287019  | rs2815752  | -0.025 (0.009)       | 7.56E-03      |
| rs1555543  | rs2241423  | -0.020 (0.008)       | 9.45E-03      |
| rs12622013 | rs2815752  | -0.026 (0.010)       | 1.12E-02      |
| rs2241423  | rs543874   | -0.024 (0.010)       | 1.36E-02      |
| rs12444979 | rs2287019  | -0.034 (0.014)       | 1.45E-02      |
| rs1555543  | rs2287019  | -0.023 (0.009)       | 1.47E-02      |
| rs12444979 | rs713586   | 0.023 (0.010)        | 1.93E-02      |
| rs2112347  | rs4836133  | 0.016 (0.007)        | 2.31E-02      |
| rs11847697 | rs571312   | -0.044 (0.020)       | 2.38E-02      |
| rs10938397 | rs571312   | 0.018 (0.008)        | 2.40E-02      |
| rs1558902  | rs987237   | -0.019 (0.009)       | 2.52E-02      |
| rs3810291  | rs987237   | -0.022 (0.010)       | 2.54E-02      |
| rs2815752  | rs7359397  | -0.015 (0.007)       | 2.77E-02      |
| rs11847697 | rs13078807 | 0.045 (0.021)        | 2.79E-02      |
| rs1514175  | rs987237   | 0.018 (0.008)        | 2.98E-02      |
| rs7138803  | rs987237   | -0.018 (0.009)       | 3.03E-02      |
| rs1555543  | rs7359397  | 0.014 (0.007)        | 3.11E-02      |
| rs12444979 | rs3817334  | 0.021 (0.010)        | 3.11E-02      |
| rs10938397 | rs206936   | 0.018 (0.008)        | 3.18E-02      |
| rs2241423  | rs571312   | 0.019 (0.009)        | 3.24E-02      |
| rs29941    | rs7138803  | -0.015 (0.007)       | 3.26E-02      |
| rs713586   | rs987237   | 0.017 (0.008)        | 3.72E-02      |
| rs1558902  | rs4771122  | -0.016 (0.008)       | 3.78E-02      |
| rs10938397 | rs4771122  | -0.017 (0.008)       | 3.93E-02      |
| rs7138803  | rs7359397  | -0.014 (0.007)       | 4.05E-02      |
| rs13078807 | rs29941    | -0.017 (0.009)       | 4.17E-02      |
| rs2241423  | rs4771122  | 0.019 (0.009)        | 4.17E-02      |
| rs3817334  | rs7138803  | 0.013 (0.007)        | 4.34E-02      |
| rs11847697 | rs3810291  | -0.038 (0.019)       | 4.38E-02      |
| rs7359397  | rs987237   | -0.017 (0.008)       | 4.55E-02      |
| rs12444979 | rs29941    | -0.020 (0.010)       | 4.96E-02      |

## Supplementary Note

**Supplementary Note - Table 11** Dominant, recessive and dominance deviation results for nominally significant (dominance deviation  $P < 0.05$ ) lead SNPs at the 32 confirmed BMI loci. The effect allele is the BMI-increasing allele. Only SNPs with a dominance deviation  $P < 0.05$  are presented. The results are not significant at  $P < 0.05$  after correcting for the number of tests performed.



Supplementary Note - Table 11

**Supplementary Note - Table 11 -- Dominant, recessive and dominance deviation results for nominally significant (dominance deviation  $P < 0.05$ ) lead SNPs at the 32 confirmed BMI loci. The effect allele is the BMI-increasing allele. Only SNPs with a dominance deviation  $P < 0.05$  are presented. The results are not significant at  $P < 0.05$  after correcting for the number of tests performed.**

| SNP        | Nearest gene  | Effect Allele | Other Allele | Additive beta (SE) | Additive P-value | Dominant beta (SE) | Dominant P-value | Recessive beta (SE) | Recessive P-value | Dom Dev beta (SE) | Dom Dev P-value |
|------------|---------------|---------------|--------------|--------------------|------------------|--------------------|------------------|---------------------|-------------------|-------------------|-----------------|
| rs1558902  | <i>FTO</i>    | a             | t            | 0.084 (0.005)      | 1.20E-74         | 0.093 (0.007)      | 5.70E-45         | 0.132 (0.008)       | 3.50E-56          | -0.019 (0.006)    | 3.47E-03        |
| rs12444979 | <i>GPRC5B</i> | c             | t            | 0.054 (0.007)      | 5.80E-16         | 0.035 (0.025)      | 1.50E-01         | 0.063 (0.007)       | 1.70E-17          | -0.035 (0.014)    | 1.15E-02        |

## Supplementary Note

**Supplementary Note - Table 12** PubMed and OMIM hits for genes within 500kb of 32 BMI-associated SNPs, using terms "obesity" and "BMI".

## Supplementary Note - Table 12 -- PubMed and OMIM hits for genes within 500kb of 32 BMI-associated SNPs, using terms "obesity" and "BMI"

| Gene   | index SNP | Chr | Position | OMIM terms   | Distance (nt)* | Pubmed hit with search terms "obesity" or "BMI"                                                                                                                                                                                                                                                                  |
|--------|-----------|-----|----------|--------------|----------------|------------------------------------------------------------------------------------------------------------------------------------------------------------------------------------------------------------------------------------------------------------------------------------------------------------------|
| TMEM18 | rs2867125 | 2   | 612827   | bmi          | 45,146         | Almén MS et al. The obesity gene, TMEM18, is of ancient origin, found in majority of neuronal cells in all major brain regions and associated with obesity in severely obese children. <i>BMC Med Genet.</i> 2010 Apr 9;11:58. PMID: 20380707                                                                    |
| ACP1   | rs2867125 | 2   | 612827   | no match     | 344,547        | Apelt N et al. ACP1 genotype, glutathione reductase activity, and riboflavin uptake affect cardiovascular risk in the obese. <i>Metabolism.</i> 2009 Oct;58(10):1415-23. PMID: 19570551                                                                                                                          |
| ACP1   | rs2867125 | 2   | 612827   | no match     | 344,547        | Bottini E et al. Enzyme polymorphism and clinical variability of diseases: study of acid phosphatase locus 1 (ACP1) in obese subjects. <i>Hum Biol.</i> 1990 Jun;62(3):403-11. PMID: 2373509                                                                                                                     |
| ACP1   | rs2867125 | 2   | 612827   | no match     | 344,547        | Bottini N et al. Association of the acid phosphatase (ACP1) gene with triglyceride levels in obese women. <i>Mol Genet Metab.</i> 2002 Nov;77(3):226-9. PMID: 12409270                                                                                                                                           |
| ACP1   | rs2867125 | 2   | 612827   | no match     | 344,547        | Bottini N et al. Low-molecular-weight protein tyrosine phosphatase and human disease: in search of biochemical mechanisms. <i>Arch Immunol Ther Exp (Warsz).</i> 2002;50(2):95-104. PMID: 12022706                                                                                                               |
| ACP1   | rs2867125 | 2   | 612827   | no match     | 344,547        | Bottini N et al. Type 2 diabetes and the genetics of signal transduction: a study of interaction between adenosine deaminase and acid phosphatase locus 1 polymorphisms. <i>Metabolism.</i> 2004 Aug;53(8):995-1001. PMID: 15281007                                                                              |
| ACP1   | rs2867125 | 2   | 612827   | no match     | 344,547        | De Lorenzo A et al. A study of acid phosphatase locus 1 in women with high fat content and normal body mass index. <i>Metabolism.</i> 2009 Mar;58(3):351-4. PMID: 19217450                                                                                                                                       |
| ACP1   | rs2867125 | 2   | 612827   | no match     | 344,547        | Gloria-Bottini F et al. Body mass index and acid phosphatase locus 1 in diabetic disorders. <i>Acta Diabetol.</i> 2009 Oct 24; PMID: 19855922                                                                                                                                                                    |
| ACP1   | rs2867125 | 2   | 612827   | no match     | 344,547        | Gloria-Bottini F et al. Effect of ACP1*C on early life viability. <i>Hum Biol.</i> 2006 Jun;78(3):365-9. PMID: 17216808                                                                                                                                                                                          |
| ACP1   | rs2867125 | 2   | 612827   | no match     | 344,547        | Gloria-Bottini F et al. Interaction at clinical level between erythrocyte acid phosphatase and adenosine deaminase genetic polymorphisms. <i>Hum Genet.</i> 1989 Jun;82(3):213-5. PMID: 2731933                                                                                                                  |
| ACP1   | rs2867125 | 2   | 612827   | no match     | 344,547        | Gloria-Bottini F et al. The effect of genetic and seasonal factors on birth weight. <i>Early Hum Dev.</i> 2009 Jul;85(7):439-41. PMID: 19329262                                                                                                                                                                  |
| ACP1   | rs2867125 | 2   | 612827   | no match     | 344,547        | Gloria-Bottini F et al. The link between obesity and allergy: a role of ACP1 genetic polymorphism?. <i>Int J Obes (Lond).</i> 2007 Feb;31(2):392-3. PMID: 16770334                                                                                                                                               |
| ACP1   | rs2867125 | 2   | 612827   | no match     | 344,547        | Greene LS et al. Acid phosphatase locus 1 (ACP1): Possible relationship of allelic variation to body size and human population adaptation to thermal stress-A theoretical perspective. <i>Am J Hum Biol.</i> 2000 Sep;12(5):688-701. PMID: 11534062                                                              |
| ACP1   | rs2867125 | 2   | 612827   | no match     | 344,547        | Lucarini N et al. A possible genetic component of obesity in childhood. Observations on acid phosphatase polymorphism. <i>Experientia.</i> 1990 Jan 15;46(1):90-1. PMID: 2298287                                                                                                                                 |
| ACP1   | rs2867125 | 2   | 612827   | no match     | 344,547        | Lucarini N et al. Low-molecular-weight acid phosphatase (ACP1), obesity, and blood lipid levels in subjects with non-insulin-dependent diabetes mellitus. <i>Hum Biol.</i> 1997 Aug;69(4):509-15. PMID: 9198310                                                                                                  |
| ACP1   | rs2867125 | 2   | 612827   | no match     | 344,547        | Lucarini N et al. Phosphotyrosine-protein-phosphatase and diabetic disorders. Further studies on the relationship between low molecular weight acid phosphatase genotype and degree of glycemic control. <i>Dis Markers.</i> 1998 Oct;14(2):121-5. PMID: 9868599                                                 |
| ACP1   | rs2867125 | 2   | 612827   | no match     | 344,547        | Maccari R et al. Structure-based optimization of benzoic acids as inhibitors of protein tyrosine phosphatase 1B and low molecular weight protein tyrosine phosphatase. <i>ChemMedChem.</i> 2009 Jun;4(6):957-62. PMID: 19288492                                                                                  |
| ACP1   | rs2867125 | 2   | 612827   | no match     | 344,547        | Paggi A et al. Further studies on acid phosphatase in obese subjects. <i>Dis Markers.</i> 1991 Jan-Feb;9(1):1-7. PMID: 1742941                                                                                                                                                                                   |
| ACP1   | rs2867125 | 2   | 612827   | no match     | 344,547        | Pandey SK et al. Reduction of low molecular weight protein-tyrosine phosphatase expression improves hyperglycemia and insulin sensitivity in obese mice. <i>J Biol Chem.</i> 2007 May 11;282(19):14291-9. PMID: 17353188                                                                                         |
| CENPO  | rs713586  | 2   | 25011512 | no match     | 115,224        | Obuse C et al. Proteomics analysis of the centromere complex from HeLa interphase cells: UV-damaged DNA binding protein 1 (DDB-1) is a component of the CEN-complex, while BMI-1 is transiently co-localized with the centromeric region in interphase. <i>Genes Cells.</i> 2004 Feb;9(2):105-20. PMID: 15009096 |
| NCOA1  | rs713586  | 2   | 25011512 | obesity      | 164,438        | Fan D et al. Mechanistic roles of leptin in osteogenic stimulation in thoracic ligament flavum cells. <i>J Biol Chem.</i> 2007 Oct 12;282(41):29958-66. PMID: 17702747                                                                                                                                           |
| NCOA1  | rs713586  | 2   | 25011512 | obesity      | 164,438        | Foryst-Ludwig A et al. Metabolic actions of estrogen receptor beta (ERbeta) are mediated by a negative cross-talk with PPARgamma. <i>PLoS Genet.</i> 2008 Jun 27;4(6):e1000108. PMID: 18584035                                                                                                                   |
| NCOA1  | rs713586  | 2   | 25011512 | obesity      | 164,438        | Jeong JW et al. The genomic analysis of the impact of steroid receptor coactivators ablation on hepatic metabolism. <i>Mol Endocrinol.</i> 2006 May;20(5):1138-52. PMID: 16423883                                                                                                                                |
| NCOA1  | rs713586  | 2   | 25011512 | obesity      | 164,438        | Lee HS et al. Epitope analysis of PPARgamma monoclonal antibody Pgamma48.34A and its application for screening PPARgamma ligands. <i>J Immunol Methods.</i> 2005 Jan;296(1-2):125-34. PMID: 15680157                                                                                                             |
| NCOA1  | rs713586  | 2   | 25011512 | obesity      | 164,438        | Miard S et al. Aging alters PPARgamma in rodent and human adipose tissue by modulating the balance in steroid receptor coactivator-1. <i>Aging Cell.</i> 2009 Aug;8(4):449-59. PMID: 19485965                                                                                                                    |
| NCOA1  | rs713586  | 2   | 25011512 | obesity      | 164,438        | Picard F et al. SRC-1 and TIF2 control energy balance between white and brown adipose tissues. <i>Cell.</i> 2002 Dec 27;111(7):931-41. PMID: 12507421                                                                                                                                                            |
| NCOA1  | rs713586  | 2   | 25011512 | obesity      | 164,438        | Tateishi K et al. Role of Jhd2a in regulating metabolic gene expression and obesity resistance. <i>Nature.</i> 2009 Apr 9;458(7239):757-61. PMID: 19194461                                                                                                                                                       |
| NCOA1  | rs713586  | 2   | 25011512 | obesity      | 164,438        | Wang Z et al. Critical roles of the p160 transcriptional coactivators p/CIP and SRC-1 in energy balance. <i>Cell Metab.</i> 2006 Feb;3(2):111-22. PMID: 16459312                                                                                                                                                 |
| NCOA1  | rs713586  | 2   | 25011512 | obesity      | 164,438        | Yin N et al. Molecular mechanisms involved in the growth stimulation of breast cancer cells by leptin. <i>Cancer Res.</i> 2004 Aug 15;64(16):5870-5. PMID: 15313931                                                                                                                                              |
| POMC   | rs713586  | 2   | 25011512 | obesity, bmi | 225,714        | Alfieri A et al. Functional analysis of melanocortin-4-receptor mutants identified in severely obese subjects living in Southern Italy. <i>Gene.</i> 2010 Jun 1;457(1-2):35-41. PMID: 20214954                                                                                                                   |
| POMC   | rs713586  | 2   | 25011512 | obesity, bmi | 225,714        | Al-Qassab H et al. Dominant role of the p110beta isoform of PI3K over p110alpha in energy homeostasis regulation by POMC and AgRP neurons. <i>Cell Metab.</i> 2009 Nov;10(5):343-54. PMID: 19883613                                                                                                              |

| Gene | index SNP | Chr | Position | OMIM terms   | Distance (nt)* | Pubmed hit with search terms "obesity" or "BMI"                                                                                                                                                                                                                                                                                  |
|------|-----------|-----|----------|--------------|----------------|----------------------------------------------------------------------------------------------------------------------------------------------------------------------------------------------------------------------------------------------------------------------------------------------------------------------------------|
| POMC | rs713586  | 2   | 25011512 | obesity, bmi | 225,714        | Baker M et al. Association between common polymorphisms of the proopiomelanocortin gene and body fat distribution: a family study. <i>Diabetes</i> . 2005 Aug;54(8):2492-6. PMID: 16046320                                                                                                                                       |
| POMC | rs713586  | 2   | 25011512 | obesity, bmi | 225,714        | Battin J et al. [Genetic obesity in childhood]. <i>Bull Acad Natl Med</i> . 2009 Jun;193(6):1281-8. PMID: 20120159                                                                                                                                                                                                               |
| POMC | rs713586  | 2   | 25011512 | obesity, bmi | 225,714        | Biebermann H et al. A role for beta-melanocyte-stimulating hormone in human body-weight regulation. <i>Cell Metab</i> . 2006 Feb;3(2):141-6. PMID: 16459315                                                                                                                                                                      |
| POMC | rs713586  | 2   | 25011512 | obesity, bmi | 225,714        | Bienertova-Vasku J et al. No association of defined variability in leptin, leptin receptor, adiponectin, proopiomelanocortin and ghrelin gene with food preferences in the Czech population. <i>Nutr Neurosci</i> . 2008 Feb;11(1):2-8. PMID: 18510797                                                                           |
| POMC | rs713586  | 2   | 25011512 | obesity, bmi | 225,714        | Bjørbaek C et al. Central leptin receptor action and resistance in obesity. <i>J Investig Med</i> . 2009 Oct;57(7):789-94. PMID: 20029269                                                                                                                                                                                        |
| POMC | rs713586  | 2   | 25011512 | obesity, bmi | 225,714        | Bruno OD et al. In what clinical settings should Cushing's syndrome be suspected?. <i>Medicina (B Aires)</i> . 2009;69(6):674-80. PMID: 20053613                                                                                                                                                                                 |
| POMC | rs713586  | 2   | 25011512 | obesity, bmi | 225,714        | Buono P et al. Six novel mutations in the proopiomelanocortin and melanocortin receptor 4 genes in severely obese adults living in southern Italy. <i>Clin Chem</i> . 2005 Aug;51(8):1358-64. PMID: 15951321                                                                                                                     |
| POMC | rs713586  | 2   | 25011512 | obesity, bmi | 225,714        | Cakir I et al. Hypothalamic Sirt1 regulates food intake in a rodent model system. <i>PLoS One</i> . 2009 Dec 15;4(12):e8322. PMID: 20020036                                                                                                                                                                                      |
| POMC | rs713586  | 2   | 25011512 | obesity, bmi | 225,714        | Challis BG et al. A missense mutation disrupting a dibasic prohormone processing site in pro-opiomelanocortin (POMC) increases susceptibility to early-onset obesity through a novel molecular mechanism. <i>Hum Mol Genet</i> . 2002 Aug 15;11(17):1997-2004. PMID: 12165561                                                    |
| POMC | rs713586  | 2   | 25011512 | obesity, bmi | 225,714        | Chen HH et al. Severe obesity is associated with novel single nucleotide polymorphisms of the ESR1 and PPARgamma locus in Han Chinese. <i>Am J Clin Nutr</i> . 2009 Aug;90(2):255-62. PMID: 19491387                                                                                                                             |
| POMC | rs713586  | 2   | 25011512 | obesity, bmi | 225,714        | Chuang JC et al. A beta(3)-Adrenergic-Leptin-Melanocortin Circuit Regulates Behavioral and Metabolic Changes Induced by Chronic Stress. <i>Biol Psychiatry</i> . 2010 Jan 8; PMID: 20060958                                                                                                                                      |
| POMC | rs713586  | 2   | 25011512 | obesity, bmi | 225,714        | Corander MP et al. Science of self-preservation: how melanocortin action in the brain modulates body weight, blood pressure, and ischemic damage. <i>Circulation</i> . 2009 Dec 1;120(22):2260-8. PMID: 19948994                                                                                                                 |
| POMC | rs713586  | 2   | 25011512 | obesity, bmi | 225,714        | Creemers JW et al. Mutations in the amino-terminal region of proopiomelanocortin (POMC) in patients with early-onset obesity impair POMC sorting to the regulated secretory pathway. <i>J Clin Endocrinol Metab</i> . 2008 Nov;93(11):4494-9. PMID: 18697863                                                                     |
| POMC | rs713586  | 2   | 25011512 | obesity, bmi | 225,714        | Darcan S et al. Transient salt wasting in POMC-deficiency due to infection induced stress. <i>Exp Clin Endocrinol Diabetes</i> . 2010 Apr;118(4):281-3. PMID: 19998238                                                                                                                                                           |
| POMC | rs713586  | 2   | 25011512 | obesity, bmi | 225,714        | Delplanque J et al. Linkage and association studies between the proopiomelanocortin (POMC) gene and obesity in caucasian families. <i>Diabetologia</i> . 2000 Dec;43(12):1554-7. PMID: 11151766                                                                                                                                  |
| POMC | rs713586  | 2   | 25011512 | obesity, bmi | 225,714        | Doecke JD et al. Single nucleotide polymorphisms in obesity-related genes and the risk of esophageal cancers. <i>Cancer Epidemiol Biomarkers Prev</i> . 2008 Apr;17(4):1007-12. PMID: 18398047                                                                                                                                   |
| POMC | rs713586  | 2   | 25011512 | obesity, bmi | 225,714        | Dubern B et al. Mutational analysis of the pro-opiomelanocortin gene in French obese children led to the identification of a novel deleterious heterozygous mutation located in the alpha-melanocyte stimulating hormone domain. <i>Pediatr Res</i> . 2008 Feb;63(2):211-6. PMID: 18091355                                       |
| POMC | rs713586  | 2   | 25011512 | obesity, bmi | 225,714        | Echwald SM et al. Mutational analysis of the proopiomelanocortin gene in Caucasians with early onset obesity. <i>Int J Obes Relat Metab Disord</i> . 1999 Mar;23(3):293-8. PMID: 10193875                                                                                                                                        |
| POMC | rs713586  | 2   | 25011512 | obesity, bmi | 225,714        | Gout J et al. Metabolic and melanocortin gene expression alterations in male offspring of obese mice. <i>Mol Cell Endocrinol</i> . 2010 May 5;319(1-2):99-108. PMID: 20097259                                                                                                                                                    |
| POMC | rs713586  | 2   | 25011512 | obesity, bmi | 225,714        | Grayson BE et al. Changes in melanocortin expression and inflammatory pathways in fetal offspring of nonhuman primates fed a high-fat diet. <i>Endocrinology</i> . 2010 Apr;151(4):1622-32. PMID: 20176722                                                                                                                       |
| POMC | rs713586  | 2   | 25011512 | obesity, bmi | 225,714        | Hall JE et al. Obesity-induced Hypertension: Role of Sympathetic Nervous System, Leptin and Melanocortins. <i>J Biol Chem</i> . 2010 Mar 26; PMID: 20348094                                                                                                                                                                      |
| POMC | rs713586  | 2   | 25011512 | obesity, bmi | 225,714        | Hawke Z et al. PACAP neurons in the hypothalamic ventromedial nucleus are targets of central leptin signaling. <i>J Neurosci</i> . 2009 Nov 25;29(47):14828-35. PMID: 19940178                                                                                                                                                   |
| POMC | rs713586  | 2   | 25011512 | obesity, bmi | 225,714        | Hetherington MM et al. Gene-environment interactions in obesity. <i>Forum Nutr</i> . 2010;63:195-203. PMID: 19955787                                                                                                                                                                                                             |
| POMC | rs713586  | 2   | 25011512 | obesity, bmi | 225,714        | Hinney A et al. Systematic mutation screening of the pro-opiomelanocortin gene: identification of several genetic variants including three different insertions, one nonsense and two missense point mutations in probands of different weight extremes. <i>J Clin Endocrinol Metab</i> . 1998 Oct;83(10):3737-41. PMID: 9768693 |
| POMC | rs713586  | 2   | 25011512 | obesity, bmi | 225,714        | Hochberg I et al. Hypothalamic Obesity. <i>Endocr Dev</i> . 2010;17:185-196. PMID: 19955767                                                                                                                                                                                                                                      |
| POMC | rs713586  | 2   | 25011512 | obesity, bmi | 225,714        | Iskandar K et al. PDK-1/FoxO1 pathway in POMC neurons regulates Pomc expression and food intake. <i>Am J Physiol Endocrinol Metab</i> . 2010 Apr;298(4):E787-98. PMID: 20103739                                                                                                                                                  |
| POMC | rs713586  | 2   | 25011512 | obesity, bmi | 225,714        | Kim DH et al. Peptide designed to elicit apoptosis in adipose tissue endothelium reduces food intake and body weight. <i>Diabetes</i> . 2010 Apr;59(4):907-15. PMID: 20103704                                                                                                                                                    |
| POMC | rs713586  | 2   | 25011512 | obesity, bmi | 225,714        | Krude H et al. Severe early-onset obesity, adrenal insufficiency and red hair pigmentation caused by POMC mutations in humans. <i>Nat Genet</i> . 1998 Jun;19(2):155-7. PMID: 9620771                                                                                                                                            |
| POMC | rs713586  | 2   | 25011512 | obesity, bmi | 225,714        | la Fleur SE et al. A free-choice high-fat high-sugar diet induces changes in arcuate neuropeptide expression that support hyperphagia. <i>Int J Obes (Lond)</i> . 2010 Mar;34(3):537-46. PMID: 20029382                                                                                                                          |
| POMC | rs713586  | 2   | 25011512 | obesity, bmi | 225,714        | Lee YS et al. A POMC variant implicates beta-melanocyte-stimulating hormone in the control of human energy balance. <i>Cell Metab</i> . 2006 Feb;3(2):135-40. PMID: 16459314                                                                                                                                                     |
| POMC | rs713586  | 2   | 25011512 | obesity, bmi | 225,714        | Li JY et al. Expression of ankyrin repeat and suppressor of cytokine signaling box protein 4 (Asb-4) in proopiomelanocortin neurons of the arcuate nucleus of mice produces a hyperphagic, lean phenotype. <i>Endocrinology</i> . 2010 Jan;151(1):134-42. PMID: 19934378                                                         |

| Gene    | index SNP | Chr | Position  | OMIM terms   | Distance (nt)* | Pubmed hit with search terms "obesity" or "BMI"                                                                                                                                                                                    |
|---------|-----------|-----|-----------|--------------|----------------|------------------------------------------------------------------------------------------------------------------------------------------------------------------------------------------------------------------------------------|
| POMC    | rs713586  | 2   | 25011512  | obesity, bmi | 225,714        | Li P et al. Expression of adiponectin receptors in mouse adrenal glands and the adrenocortical Y-1 cell line: Adiponectin regulates steroidogenesis. <i>Biochem Biophys Res Commun.</i> 2009 Dec 25;390(4):1208-13. PMID: 19878661 |
| POMC    | rs713586  | 2   | 25011512  | obesity, bmi | 225,714        | Lin S et al. Critical role of arcuate Y4 receptors and the melanocortin system in pancreatic polypeptide-induced reduction in food intake in mice. <i>PLoS One.</i> 2009 Dec 30;4(12):e8488. PMID: 20041129                        |
| POMC    | rs713586  | 2   | 25011512  | obesity, bmi | 225,714        | Macia L et al. Interleukin-7, a new cytokine targeting the mouse hypothalamic arcuate nucleus: role in body weight and food intake regulation. <i>PLoS One.</i> 2010 Apr 1;5(4):e9953. PMID: 20376352                              |
| POMC    | rs713586  | 2   | 25011512  | obesity, bmi | 225,714        | Menzies JR et al. Direct and Indirect Effects of Cannabinoids on in vitro GABA Release in the Rat Arcuate Nucleus. <i>J Neuroendocrinol.</i> 2010 Mar 2;. PMID: 20236227                                                           |
| POMC    | rs713586  | 2   | 25011512  | obesity, bmi | 225,714        | Miraglia del Giudice E et al. Molecular screening of the proopiomelanocortin (POMC) gene in Italian obese children: report of three new mutations. <i>Int J Obes Relat Metab Disord.</i> 2001 Jan;25(1):61-7. PMID: 11244459       |
| POMC    | rs713586  | 2   | 25011512  | obesity, bmi | 225,714        | Ohshiro Y et al. Sequence analysis of the pro-opiomelanocortin (POMC) gene in obese/diabetic Japanese. <i>Int J Obes Relat Metab Disord.</i> 2002 May;26(5):730-1. PMID: 12032760                                                  |
| POMC    | rs713586  | 2   | 25011512  | obesity, bmi | 225,714        | Olaszewski PK et al. Alpha-melanocyte stimulating hormone and ghrelin: central interaction in feeding control. <i>Peptides.</i> 2007 Oct;28(10):2084-9. PMID: 17719137                                                             |
| POMC    | rs713586  | 2   | 25011512  | obesity, bmi | 225,714        | Pankov luA et al. [Screening of mutations in genes of pro-opiomelanocortin in patients with constitutional exogenous obesity]. <i>Vopr Med Khim.</i> 2002 Jan- Feb;48(1):121-30. PMID: 12068494                                    |
| POMC    | rs713586  | 2   | 25011512  | obesity, bmi | 225,714        | Pétevári E et al. Suppression of food intake by intracerebroventricular injection of alpha-MSH varies with age in rats. <i>Acta Physiol Hung.</i> 2009 Dec;96(4):483-7. PMID: 19942555                                             |
| POMC    | rs713586  | 2   | 25011512  | obesity, bmi | 225,714        | Potoczna N et al. Gene variants and binge eating as predictors of comorbidity and outcome of treatment in severe obesity. <i>J Gastrointest Surg.</i> 2004 Dec;8(8):971-81; discussion 981-2. PMID: 15585384                       |
| POMC    | rs713586  | 2   | 25011512  | obesity, bmi | 225,714        | Reed AS et al. Functional role of suppressor of cytokine signaling 3 upregulation in hypothalamic leptin resistance and long-term energy homeostasis. <i>Diabetes.</i> 2010 Apr;59(4):894-906. PMID: 20068134                      |
| POMC    | rs713586  | 2   | 25011512  | obesity, bmi | 225,714        | Rosmond R et al. Polymorphisms in exon 3 of the proopiomelanocortin gene in relation to serum leptin, salivary cortisol, and obesity in Swedish men. <i>Metabolism.</i> 2002 May;51(5):642-4. PMID: 11979399                       |
| POMC    | rs713586  | 2   | 25011512  | obesity, bmi | 225,714        | Ruaño G et al. Physiogenomic comparison of edema and BMI in patients receiving rosiglitazone or pioglitazone. <i>Clin Chim Acta.</i> 2009 Feb;400(1-2):48-55. PMID: 18996102                                                       |
| POMC    | rs713586  | 2   | 25011512  | obesity, bmi | 225,714        | Santoro N et al. An insertional polymorphism of the proopiomelanocortin gene is associated with fasting insulin levels in childhood obesity. <i>J Clin Endocrinol Metab.</i> 2004 Oct;89(10):4846-9. PMID: 15472174                |
| POMC    | rs713586  | 2   | 25011512  | obesity, bmi | 225,714        | Stefater MA et al. Sleeve Gastrectomy Induces Loss of Weight and Fat Mass in Obese Rats, but Does Not Affect Leptin Sensitivity. <i>Gastroenterology.</i> 2010 Mar 10;. PMID: 20226189                                             |
| POMC    | rs713586  | 2   | 25011512  | obesity, bmi | 225,714        | Su H et al. Gamma-protocadherins regulate the functional integrity of hypothalamic feeding circuitry in mice. <i>Dev Biol.</i> 2010 Mar 1;339(1):38-50. PMID: 20025866                                                             |
| POMC    | rs713586  | 2   | 25011512  | obesity, bmi | 225,714        | Sutton GM et al. Protein malnutrition during pregnancy in C57BL/6J mice results in offspring with altered circadian physiology before obesity. <i>Endocrinology.</i> 2010 Apr;151(4):1570-80. PMID: 20160133                       |
| POMC    | rs713586  | 2   | 25011512  | obesity, bmi | 225,714        | Tung YC et al. Hypothalamic-specific manipulation of Fto, the ortholog of the human obesity gene FTO, affects food intake in rats. <i>PLoS One.</i> 2010 Jan 19;5(1):e8771. PMID: 20025866                                         |
| POMC    | rs713586  | 2   | 25011512  | obesity, bmi | 225,714        | Valli-Jaakola K et al. Further evidence for the role of ENPP1 in obesity: association with morbid obesity in Finns. <i>Obesity (Silver Spring).</i> 2008 Sep;16(9):2113-9. PMID: 18551113                                          |
| POMC    | rs713586  | 2   | 25011512  | obesity, bmi | 225,714        | Xiao E et al. Effects of estradiol on cerebrospinal fluid levels of agouti-related protein in ovariectomized rhesus monkeys. <i>Endocrinology.</i> 2010 Mar;151(3):1002-9. PMID: 20056830                                          |
| POMC    | rs713586  | 2   | 25011512  | obesity, bmi | 225,714        | Yang G et al. FoxO1 inhibits leptin regulation of pro-opiomelanocortin promoter activity by blocking STAT3 interaction with specificity protein 1. <i>J Biol Chem.</i> 2009 Feb 6;284(6):3719-27. PMID: 19049975                   |
| DNMT3A  | rs713586  | 2   | 25011512  | no match     | 297,837        | Kamei Y et al. Increased expression of DNA methyltransferase 3a in obese adipose tissue: studies with transgenic mice. <i>Obesity (Silver Spring).</i> 2010 Feb;18(2):314-21. PMID: 19680236                                       |
| LRP1B   | rs2890652 | 2   | 142676401 | no match     | 70,661         | Masson O et al. LRP1 receptor controls adipogenesis and is up-regulated in human and mouse obese adipose tissue. <i>PLoS One.</i> 2009 Oct 12;4(10):e7422. PMID: 19823686                                                          |
| IGF2BP2 | rs9816226 | 3   | 187317193 | obesity      | 291,672        | Pecioska S et al. Association between type 2 diabetes loci and measures of fatness. <i>PLoS One.</i> 2010 Jan 1;5(1):e8541. PMID: 20049090                                                                                         |
| IGF2BP2 | rs9816226 | 3   | 187317193 | obesity      | 291,672        | Ruchat SM et al. Combining genetic markers and clinical risk factors improves the risk assessment of impaired glucose metabolism. <i>Ann Med.</i> 2010 Apr;42(3):196-206. PMID: 20384434                                           |
| IGF2BP2 | rs9816226 | 3   | 187317193 | obesity      | 291,672        | Sjögren M et al. The search for putative genetic factors for components of the metabolic syndrome. <i>Diabetologia.</i> 2008 Dec;51(12):2242-51. PMID: 18853134                                                                    |
| AHSG    | rs9816226 | 3   | 187317193 | no match     | 496,351        | Andersen G et al. AHSG tag single nucleotide polymorphisms associate with type 2 diabetes and dyslipidemia: studies of metabolic traits in 7,683 white Danish subjects. <i>Diabetes.</i> 2008 May;57(5):1427-32. PMID: 18316360    |
| AHSG    | rs9816226 | 3   | 187317193 | no match     | 496,351        | Axelsson J et al. Is fetuin-A/alpha2-Heremans-Schmid glycoprotein associated with the metabolic syndrome in patients with chronic kidney disease?. <i>Am J Nephrol.</i> 2008;28(4):669-76. PMID: 18337634                          |
| AHSG    | rs9816226 | 3   | 187317193 | no match     | 496,351        | Dahlman I et al. alpha2-Heremans-Schmid glycoprotein gene polymorphisms are associated with adipocyte insulin action. <i>Diabetologia.</i> 2004 Nov;47(11):1974-9. PMID: 15599699                                                  |
| AHSG    | rs9816226 | 3   | 187317193 | no match     | 496,351        | Ix JH et al. Mechanisms linking obesity, chronic kidney disease, and fatty liver disease: the roles of fetuin-A, adiponectin, and AMPK. <i>J Am Soc Nephrol.</i> 2010 Mar;21(3):406-12. PMID: 20150538                             |

| Gene   | index SNP  | Chr | Position  | OMIM terms | Distance (nt)* | Pubmed hit with search terms "obesity" or "BMI"                                                                                                                                                                                                    |
|--------|------------|-----|-----------|------------|----------------|----------------------------------------------------------------------------------------------------------------------------------------------------------------------------------------------------------------------------------------------------|
| AHSG   | rs9816226  | 3   | 187317193 | no match   | 496,351        | Lavebratt C et al. Polymorphism of the AHSG gene is associated with increased adipocyte beta2-adrenoceptor function. <i>J Lipid Res.</i> 2005 Oct;46(10):2278-81. PMID: 16024912                                                                   |
| AHSG   | rs9816226  | 3   | 187317193 | no match   | 496,351        | Mathews ST et al. Fetuin-null mice are protected against obesity and insulin resistance associated with aging. <i>Biochem Biophys Res Commun.</i> 2006 Nov 17;350(2):437-43. PMID: 17011519                                                        |
| AHSG   | rs9816226  | 3   | 187317193 | no match   | 496,351        | Mathews ST et al. Improved insulin sensitivity and resistance to weight gain in mice null for the Ahsg gene. <i>Diabetes.</i> 2002 Aug;51(8):2450-8. PMID: 12145157                                                                                |
| AHSG   | rs9816226  | 3   | 187317193 | no match   | 496,351        | Müssig K et al. AHSG gene variation is not associated with regional body fat distribution—a magnetic resonance study." <i>Exp Clin Endocrinol Diabetes.</i> 2009 Sep;117(8):432-7. PMID: 19358088                                                  |
| AHSG   | rs9816226  | 3   | 187317193 | no match   | 496,351        | Oikawa O et al. Evaluation of serum fetuin-A relationships with biochemical parameters in patients on hemodialysis. <i>Clin Exp Nephrol.</i> 2007 Dec;11(4):304-8. PMID: 18085392                                                                  |
| AHSG   | rs9816226  | 3   | 187317193 | no match   | 496,351        | Reinehr T et al. Fetuin-A and its relation to metabolic syndrome and fatty liver disease in obese children before and after weight loss. <i>J Clin Endocrinol Metab.</i> 2008 Nov;93(11):4479-85. PMID: 18728159                                   |
| AHSG   | rs9816226  | 3   | 187317193 | no match   | 496,351        | Siddiq A et al. A synonymous coding polymorphism in the alpha2-Heremans-schmid glycoprotein gene is associated with type 2 diabetes in French Caucasians. <i>Diabetes.</i> 2005 Aug;54(8):2477-81. PMID: 16046317                                  |
| AHSG   | rs9816226  | 3   | 187317193 | no match   | 496,351        | Stefan N et al. Alpha2-Heremans-Schmid glycoprotein/fetuin-A is associated with insulin resistance and fat accumulation in the liver in humans. <i>Diabetes Care.</i> 2006 Apr;29(4):853-7. PMID: 16567827                                         |
| AHSG   | rs9816226  | 3   | 187317193 | no match   | 496,351        | Stefan N et al. Plasma fetuin-A levels and the risk of type 2 diabetes. <i>Diabetes.</i> 2008 Oct;57(10):2762-7. PMID: 18633113                                                                                                                    |
| AHSG   | rs9816226  | 3   | 187317193 | no match   | 496,351        | Yilmaz MI et al. Endothelial dysfunction in type-2 diabetics with early diabetic nephropathy is associated with low circulating adiponectin. <i>Nephrol Dial Transplant.</i> 2008 May;23(5):1621-7. PMID: 18175782                                 |
| NFKB1  | rs13107325 | 4   | 103407732 | obesity    | 233,786        | Haugen F et al. Activation of nuclear factor-kappaB by high molecular weight and globular adiponectin. <i>Endocrinology.</i> 2007 Nov;148(11):5478-86. PMID: 17702846                                                                              |
| NFKB1  | rs13107325 | 4   | 103407732 | obesity    | 233,786        | Hou B et al. Tumor necrosis factor alpha activates the human plasminogen activator inhibitor-1 gene through a distal nuclear factor kappaB site. <i>J Biol Chem.</i> 2004 Apr 30;279(18):18127-36. PMID: 14963043                                  |
| NFKB1  | rs13107325 | 4   | 103407732 | obesity    | 233,786        | Nareika A et al. Sodium lactate increases LPS-stimulated MMP and cytokine expression in U937 histiocytes by enhancing AP-1 and NF-kappaB transcriptional activities. <i>Am J Physiol Endocrinol Metab.</i> 2005 Oct;289(4):E534-42. PMID: 15941782 |
| NFKB1  | rs13107325 | 4   | 103407732 | obesity    | 233,786        | Prada PO et al. EGFR tyrosine kinase inhibitor (PD153035) improves glucose tolerance and insulin action in high-fat diet-fed mice. <i>Diabetes.</i> 2009 Dec;58(12):2910-9. PMID: 19696185                                                         |
| NFKB1  | rs13107325 | 4   | 103407732 | obesity    | 233,786        | Sheu WH et al. Effect of weight loss on proinflammatory state of mononuclear cells in obese women. <i>Obesity (Silver Spring).</i> 2008 May;16(5):1033-8. PMID: 18356846                                                                           |
| NFKB1  | rs13107325 | 4   | 103407732 | obesity    | 233,786        | Silswal N et al. Human resistin stimulates the pro-inflammatory cytokines TNF-alpha and IL-12 in macrophages by NF-kappaB-dependent pathway. <i>Biochem Biophys Res Commun.</i> 2005 Sep 9;334(4):1092-101. PMID: 16039994                         |
| NFKB1  | rs13107325 | 4   | 103407732 | obesity    | 233,786        | Vitseva OI et al. Inducible Toll-like receptor and NF-kappaB regulatory pathway expression in human adipose tissue. <i>Obesity (Silver Spring).</i> 2008 May;16(5):932-7. PMID: 18292749                                                           |
| HMGCR  | rs2112347  | 5   | 75050998  | no match   | 357,318        | Chan MY et al. Sequential responses to high-fat and high-calorie feeding in an obese mouse model. <i>Obesity (Silver Spring).</i> 2008 May;16(5):972-8. PMID: 18292748                                                                             |
| HMGCR  | rs2112347  | 5   | 75050998  | no match   | 357,318        | Ruaño G et al. Physiogenomic comparison of edema and BMI in patients receiving rosiglitazone or pioglitazone. <i>Clin Chim Acta.</i> 2009 Feb;400(1-2):48-55. PMID: 18996102                                                                       |
| HMGA1  | rs206936   | 6   | 34410847  | no match   | 88,861         | Anand A et al. In vivo modulation of Hmgic reduces obesity. <i>Nat Genet.</i> 2000 Apr;24(4):377-80. PMID: 10742101                                                                                                                                |
| HMGA1  | rs206936   | 6   | 34410847  | no match   | 88,861         | Auwerx J et al. Transcription, adipocyte differentiation, and obesity. <i>J Mol Med.</i> 1996 Jul;74(7):347-52. PMID: 8841947                                                                                                                      |
| HMGA1  | rs206936   | 6   | 34410847  | no match   | 88,861         | Esposito F et al. Interaction between HMGA1 and retinoblastoma protein is required for adipocyte differentiation. <i>J Biol Chem.</i> 2009 Sep 18;284(38):25993-6004. PMID: 19633359                                                               |
| TFAP2B | rs987237   | 6   | 50911009  | no match   | 0              | Ugi S et al. Relation of the Expression of Transcriptional Factor TFAP2B to That of Adipokines in Subcutaneous and Omental Adipose Tissues. <i>Obesity (Silver Spring).</i> 2009 Dec 17;. PMID: 20019683                                           |
| RIC3   | rs4929949  | 11  | 8561169   | no match   | 414,025        | Sniieder H et al. TUB is a candidate gene for late-onset obesity in women. <i>Diabetologia.</i> 2008 Jan;51(1):54-61. PMID: 17955208                                                                                                               |
| TUB    | rs4929949  | 11  | 8561169   | obesity    | 476,941        | Bäckberg M et al. Abnormal cholinergic and GABAergic vascular innervation in the hypothalamic arcuate nucleus of obese tub/tub mice. <i>Synapse.</i> 2004 Jun 15;52(4):245-57. PMID: 15103691                                                      |
| TUB    | rs4929949  | 11  | 8561169   | obesity    | 476,941        | Bäckberg M et al. Down-regulated expression of agouti-related protein (AGRP) mRNA in the hypothalamic arcuate nucleus of hyperphagic and obese tub/tub mice. <i>Brain Res Mol Brain Res.</i> 2004 Jun 18;125(1-2):129-39. PMID: 15193430           |
| TUB    | rs4929949  | 11  | 8561169   | obesity    | 476,941        | Boggon TJ et al. Implication of tubby proteins as transcription factors by structure-based functional analysis. <i>Science.</i> 1999 Dec 10;286(5447):2119-25. PMID: 10591637                                                                      |
| TUB    | rs4929949  | 11  | 8561169   | obesity    | 476,941        | Bouchard G et al. Cholesterol gallstone formation in overweight mice establishes that obesity per se is not linked directly to cholelithiasis risk. <i>J Lipid Res.</i> 2002 Jul;43(7):1105-13. PMID: 12091495                                     |
| TUB    | rs4929949  | 11  | 8561169   | obesity    | 476,941        | Caberoy NB et al. Efficient identification of tubby-binding proteins by an improved system of T7 phage display. <i>J Mol Recognit.</i> 2010 Jan- Feb;23(1):74-83. PMID: 19718693                                                                   |
| TUB    | rs4929949  | 11  | 8561169   | obesity    | 476,941        | Cantley LC et al. Transcription. Translocating tubby. <i>Science.</i> 2001 Jun 15;292(5524):2019-21. PMID: 11408644                                                                                                                                |
| TUB    | rs4929949  | 11  | 8561169   | obesity    | 476,941        | Carroll K et al. Tubby proteins: the plot thickens. <i>Nat Rev Mol Cell Biol.</i> 2004 Jan;5(1):55-63. PMID: 14708010                                                                                                                              |
| TUB    | rs4929949  | 11  | 8561169   | obesity    | 476,941        | Chung WK et al. Analysis of 30 genes (355 SNPs) related to energy homeostasis for association with adiposity in European-American and Yup'ik Eskimo populations. <i>Hum Hered.</i> 2009;67(3):193-205. PMID: 19077438                              |

| Gene | index SNP  | Chr | Position | OMIM terms   | Distance (nt)* | Pubmed hit with search terms "obesity" or "BMI"                                                                                                                                                                                           |
|------|------------|-----|----------|--------------|----------------|-------------------------------------------------------------------------------------------------------------------------------------------------------------------------------------------------------------------------------------------|
| TUB  | rs4929949  | 11  | 8561169  | obesity      | 476,941        | Coyle CA et al. Reduced activity without hyperphagia contributes to obesity in Tubby mutant mice. <i>Physiol Behav.</i> 2008 Sep 3;95(1-2):168-75. PMID: 18619628                                                                         |
| TUB  | rs4929949  | 11  | 8561169  | obesity      | 476,941        | Fukagawa K et al. [Genetic abnormality and the mechanism of ingestive disorder in obese animal model]. <i>Nippon Rinsho.</i> 2001 Mar;59(3):466-71. PMID: 11268594                                                                        |
| TUB  | rs4929949  | 11  | 8561169  | obesity      | 476,941        | Giannaccini G et al. Tubby protein in human lymphocytes from normal weight and obese subjects. <i>Clin Biochem.</i> 2007 Jul;40(11):806-9. PMID: 17498679                                                                                 |
| TUB  | rs4929949  | 11  | 8561169  | obesity      | 476,941        | He W et al. GFP-tagged expression and immunohistochemical studies to determine the subcellular localization of the tubby gene family members. <i>Brain Res Mol Brain Res.</i> 2000 Sep 30;81(1-2):109-17. PMID: 11000483                  |
| TUB  | rs4929949  | 11  | 8561169  | obesity      | 476,941        | Ikeda A et al. Genetic modification of retinal degeneration in tubby mice. <i>Exp Eye Res.</i> 2002 Apr;74(4):455-61. PMID: 12076089                                                                                                      |
| TUB  | rs4929949  | 11  | 8561169  | obesity      | 476,941        | Ikeda A et al. Microtubule-associated protein 1A is a modifier of tubby hearing (moth1). <i>Nat Genet.</i> 2002 Apr;30(4):401-5. PMID: 11925566                                                                                           |
| TUB  | rs4929949  | 11  | 8561169  | obesity      | 476,941        | Ikeda A et al. The tubby-like proteins, a family with roles in neuronal development and function. <i>J Cell Sci.</i> 2002 Jan 1;115(Pt 1):9-14. PMID: 11801719                                                                            |
| TUB  | rs4929949  | 11  | 8561169  | obesity      | 476,941        | Jones JM et al. Localization of insulin-2 (Ins-2) and the obesity mutant tubby (tub) to distinct regions of mouse chromosome 7. <i>Genomics.</i> 1992 Sep;14(1):197-9. PMID: 1358794                                                      |
| TUB  | rs4929949  | 11  | 8561169  | obesity      | 476,941        | Kapeller R et al. Tyrosine phosphorylation of tub and its association with Src homology 2 domain-containing proteins implicate tub in intracellular signaling by insulin. <i>J Biol Chem.</i> 1999 Aug 27;274(35):24980-6. PMID: 10455176 |
| TUB  | rs4929949  | 11  | 8561169  | obesity      | 476,941        | Kleyn PW et al. Identification and characterization of the mouse obesity gene tubby: a member of a novel gene family. <i>Cell.</i> 1996 Apr 19;85(2):281-90. PMID: 8612280                                                                |
| TUB  | rs4929949  | 11  | 8561169  | obesity      | 476,941        | Koritschoner NP et al. Thyroid hormone regulates the obesity gene tub. <i>EMBO Rep.</i> 2001 Jun;2(6):499-504. PMID: 11415982                                                                                                             |
| TUB  | rs4929949  | 11  | 8561169  | obesity      | 476,941        | Lee JH et al. Microarray analysis of differentially expressed genes in the brains of tubby mice. <i>Korean J Physiol Pharmacol.</i> 2009 Apr;13(2):91-7. PMID: 19885003                                                                   |
| TUB  | rs4929949  | 11  | 8561169  | obesity      | 476,941        | Mak HY et al. Polygenic control of <i>Caenorhabditis elegans</i> fat storage. <i>Nat Genet.</i> 2006 Mar;38(3):363-8. PMID: 16462744                                                                                                      |
| TUB  | rs4929949  | 11  | 8561169  | obesity      | 476,941        | Mukhopadhyay A et al. An endocytic pathway as a target of tubby for regulation of fat storage. <i>EMBO Rep.</i> 2007 Oct;8(10):931-8. PMID: 17762880                                                                                      |
| TUB  | rs4929949  | 11  | 8561169  | obesity      | 476,941        | Nagai T et al. Cause of sudden, unexpected death of Prader-Willi syndrome patients with or without growth hormone treatment. <i>Am J Med Genet A.</i> 2005 Jul 1;136(1):45-8. PMID: 15937939                                              |
| TUB  | rs4929949  | 11  | 8561169  | obesity      | 476,941        | Quinn KV et al. Monitoring changes in membrane phosphatidylinositol 4,5-bisphosphate in living cells using a domain from the transcription factor tubby. <i>J Physiol.</i> 2008 Jun 15;586(Pt 12):2855-71. PMID: 18420701                 |
| TUB  | rs4929949  | 11  | 8561169  | obesity      | 476,941        | Ronshaugen M et al. Structure and expression patterns of <i>Drosophila</i> TULP and TUSP, members of the tubby-like gene family. <i>Mech Dev.</i> 2002 Sep;117(1-2):209-15. PMID: 12204260                                                |
| TUB  | rs4929949  | 11  | 8561169  | obesity      | 476,941        | Santagata S et al. G-protein signaling through tubby proteins. <i>Science.</i> 2001 Jun 15;292(5524):2041-50. PMID: 11375483                                                                                                              |
| TUB  | rs4929949  | 11  | 8561169  | obesity      | 476,941        | Shiri-Sverdlov R et al. Identification of TUB as a novel candidate gene influencing body weight in humans. <i>Diabetes.</i> 2006 Feb;55(2):385-9. PMID: 16443771                                                                          |
| TUB  | rs4929949  | 11  | 8561169  | obesity      | 476,941        | Snieder H et al. TUB is a candidate gene for late-onset obesity in women. <i>Diabetologia.</i> 2008 Jan;51(1):54-61. PMID: 17955208                                                                                                       |
| TUB  | rs4929949  | 11  | 8561169  | obesity      | 476,941        | Stevenson DA et al. Unexpected death and critical illness in Prader-Willi syndrome: report of ten individuals. <i>Am J Med Genet A.</i> 2004 Jan 15;124A(2):158-64. PMID: 14699614                                                        |
| TUB  | rs4929949  | 11  | 8561169  | obesity      | 476,941        | Stratigopoulos G et al. Regulation of Fto/Ftm gene expression in mice and humans. <i>Am J Physiol Regul Integr Comp Physiol.</i> 2008 Apr;294(4):R1185-96. PMID: 18256137                                                                 |
| TUB  | rs4929949  | 11  | 8561169  | obesity      | 476,941        | Stretton C et al. Expression and modulation of TUB by insulin and thyroid hormone in primary rat and murine 3T3-L1 adipocytes. <i>Biochem Biophys Res Commun.</i> 2009 Dec 25;390(4):1328-33. PMID: 19887065                              |
| TUB  | rs4929949  | 11  | 8561169  | obesity      | 476,941        | Wang Y et al. Defective carbohydrate metabolism in mice homozygous for the tubby mutation. <i>Physiol Genomics.</i> 2006 Oct 11;27(2):131-40. PMID: 16849632                                                                              |
| TUB  | rs4929949  | 11  | 8561169  | obesity      | 476,941        | Way JM et al. Adipose tissue resistin expression is severely suppressed in obesity and stimulated by peroxisome proliferator-activated receptor gamma agonists. <i>J Biol Chem.</i> 2001 Jul 13;276(28):25651-3. PMID: 11373275           |
| TUB  | rs4929949  | 11  | 8561169  | obesity      | 476,941        | Xi Q et al. Mutation screen of the TUB gene in patients with retinitis pigmentosa and Leber congenital amaurosis. <i>Exp Eye Res.</i> 2006 Sep;83(3):569-73. PMID: 16643894                                                               |
| TUB  | rs4929949  | 11  | 8561169  | obesity      | 476,941        | Xu XM et al. [Physiological and molecular control of lipid accumulation in <i>Caenorhabditis elegans</i> ]. <i>Sheng Li Ke Xue Jin Zhan.</i> 2009 Apr;40(2):129-34. PMID: 19558141                                                        |
| BDNF | rs10767664 | 11  | 27682562 | obesity, bmi | 0              | Araya AV et al. Evaluation of the effect of caloric restriction on serum BDNF in overweight and obese subjects: preliminary evidences. <i>Endocrine.</i> 2008 Jun;33(3):300-4. PMID: 19012000                                             |
| BDNF | rs10767664 | 11  | 27682562 | obesity, bmi | 0              | Arumugam TV et al. Age and energy intake interact to modify cell stress pathways and stroke outcome. <i>Ann Neurol.</i> 2010 Jan;67(1):41-52. PMID: 20186857                                                                              |
| BDNF | rs10767664 | 11  | 27682562 | obesity, bmi | 0              | Beckers S et al. Association of the BDNF Val66Met variation with obesity in women. <i>Mol Genet Metab.</i> 2008 Sep-Oct;95(1-2):110-2. PMID: 18667348                                                                                     |
| BDNF | rs10767664 | 11  | 27682562 | obesity, bmi | 0              | Beckers S et al. The role of the leptin-melanocortin signalling pathway in the control of food intake. <i>Crit Rev Eukaryot Gene Expr.</i> 2009;19(4):267-87. PMID: 19817705                                                              |
| BDNF | rs10767664 | 11  | 27682562 | obesity, bmi | 0              | Beyer CE et al. Depression-like phenotype following chronic CB(1) receptor antagonism. <i>Neurobiol Dis.</i> 2010 Apr 8; PMID: 20381618                                                                                                   |
| BDNF | rs10767664 | 11  | 27682562 | obesity, bmi | 0              | Byerly MS et al. Effects of BDNF, T3, and corticosterone on expression of the hypothalamic obesity gene network in vivo and in vitro. <i>Am J Physiol Regul Integr Comp Physiol.</i> 2009 Apr;296(4):R1180-9. PMID: 19158410              |
| BDNF | rs10767664 | 11  | 27682562 | obesity, bmi | 0              | Cao L et al. Molecular therapy of obesity and diabetes by a physiological autoregulatory approach. <i>Nat Med.</i> 2009 Apr;15(4):447-54. PMID: 19270710                                                                                  |
| BDNF | rs10767664 | 11  | 27682562 | obesity, bmi | 0              | Chaldakov GN et al. NGF and BDNF: from nerves to adipose tissue, from neurokines to metabokines. <i>Riv Psichiatr.</i> 2009 Mar-Apr;44(2):79-87. PMID: 20066808                                                                           |
| BDNF | rs10767664 | 11  | 27682562 | obesity, bmi | 0              | Cordeira JW et al. Brain-derived neurotrophic factor regulates hedonic feeding by acting on the mesolimbic dopamine system. <i>J Neurosci.</i> 2010 Feb 17;30(7):2533-41. PMID: 20164338                                                  |
| BDNF | rs10767664 | 11  | 27682562 | obesity, bmi | 0              | Correia CT et al. Pharmacogenetics of risperidone therapy in autism: association analysis of eight candidate genes with drug efficacy and adverse drug reactions. <i>Pharmacogenomics J.</i> 2009 Dec 8; PMID: 19997080                   |

| Gene    | index SNP  | Chr | Position | OMIM terms   | Distance (nt)* | Pubmed hit with search terms "obesity" or "BMI"                                                                                                                                                                                                                                                                                             |
|---------|------------|-----|----------|--------------|----------------|---------------------------------------------------------------------------------------------------------------------------------------------------------------------------------------------------------------------------------------------------------------------------------------------------------------------------------------------|
| BDNF    | rs10767664 | 11  | 27682562 | obesity, bmi | 0              | Ehrlich S et al. Serum brain-derived neurotrophic factor and peripheral indicators of the serotonin system in underweight and weight-recovered adolescent girls and women with anorexia nervosa. <i>J Psychiatry Neurosci</i> . 2009 Jul;34(4):323-9. PMID: 19568484                                                                        |
| BDNF    | rs10767664 | 11  | 27682562 | obesity, bmi | 0              | Friedel S et al. Mutation screen of the brain derived neurotrophic factor gene (BDNF): identification of several genetic variants and association studies in patients with obesity, eating disorders, and attention- deficit/hyperactivity disorder. <i>Am J Med Genet B Neuropsychiatr Genet</i> . 2005 Jan 5;132B(1):96-9. PMID: 15457498 |
| BDNF    | rs10767664 | 11  | 27682562 | obesity, bmi | 0              | Friedman JM et al. Obesity: Causes and control of excess body fat. <i>Nature</i> . 2009 May 21;459(7245):340-2. PMID: 19458707                                                                                                                                                                                                              |
| BDNF    | rs10767664 | 11  | 27682562 | obesity, bmi | 0              | Golden E et al. Circulating brain-derived neurotrophic factor and indices of metabolic and cardiovascular health: data from the Baltimore Longitudinal Study of Aging. <i>PLoS One</i> . 2010 Apr 9;5(4):e10099. PMID: 20404913                                                                                                             |
| BDNF    | rs10767664 | 11  | 27682562 | obesity, bmi | 0              | Gray J et al. Hyperphagia, severe obesity, impaired cognitive function, and hyperactivity associated with functional loss of one copy of the brain- derived neurotrophic factor (BDNF) gene. <i>Diabetes</i> . 2006 Dec;55(12):3366-71. PMID: 17130481                                                                                      |
| BDNF    | rs10767664 | 11  | 27682562 | obesity, bmi | 0              | Gunstad J et al. BDNF Val66Met polymorphism is associated with body mass index in healthy adults. <i>Neuropsychobiology</i> . 2006;53(3):153-6. PMID: 16707914                                                                                                                                                                              |
| BDNF    | rs10767664 | 11  | 27682562 | obesity, bmi | 0              | Han JC et al. Brain-derived neurotrophic factor and obesity in the WAGR syndrome. <i>N Engl J Med</i> . 2008 Aug 28;359(9):918-27. PMID: 18753648                                                                                                                                                                                           |
| BDNF    | rs10767664 | 11  | 27682562 | obesity, bmi | 0              | Han JC et al. Lower Brain-Derived Neurotrophic Factor in Patients with Prader-Willi Syndrome Compared to Obese and Lean Control Subjects. <i>J Clin Endocrinol Metab</i> . 2010 Apr 28;. PMID: 20427492                                                                                                                                     |
| BDNF    | rs10767664 | 11  | 27682562 | obesity, bmi | 0              | Kaplan AS et al. A DRD4/BDNF gene-gene interaction associated with maximum BMI in women with bulimia nervosa. <i>Int J Eat Disord</i> . 2008 Jan;41(1):22-8. PMID: 17922530                                                                                                                                                                 |
| BDNF    | rs10767664 | 11  | 27682562 | obesity, bmi | 0              | Kohjima M et al. Increased food intake leads to obesity and insulin resistance in the tg2576 Alzheimer's disease mouse model. <i>Endocrinology</i> . 2010 Apr;151(4):1532-40. PMID: 20176720                                                                                                                                                |
| BDNF    | rs10767664 | 11  | 27682562 | obesity, bmi | 0              | Krabbe KS et al. Brain-derived neurotrophic factor (BDNF) and type 2 diabetes. <i>Diabetologia</i> . 2007 Feb;50(2):431-8. PMID: 17151862                                                                                                                                                                                                   |
| BDNF    | rs10767664 | 11  | 27682562 | obesity, bmi | 0              | Lee YS et al. The role of leptin-melanocortin system and human weight regulation: lessons from experiments of nature. <i>Ann Acad Med Singapore</i> . 2009 Jan;38(1):34-11. PMID: 19221669                                                                                                                                                  |
| BDNF    | rs10767664 | 11  | 27682562 | obesity, bmi | 0              | Luberg K et al. Human TrkB gene: novel alternative transcripts, protein isoforms and expression pattern in the prefrontal cerebral cortex during postnatal development. <i>J Neurochem</i> . 2010 May;113(4):952-64. PMID: 20193039                                                                                                         |
| BDNF    | rs10767664 | 11  | 27682562 | obesity, bmi | 0              | Merhi ZO et al. Plasma brain-derived neurotrophic factor in women after bariatric surgery: a pilot study. <i>Fertil Steril</i> . 2009 Apr;91(4 Suppl):1544-8. PMID: 18950757                                                                                                                                                                |
| BDNF    | rs10767664 | 11  | 27682562 | obesity, bmi | 0              | Pedersen BK et al. Role of exercise-induced brain-derived neurotrophic factor production in the regulation of energy homeostasis in mammals. <i>Exp Physiol</i> . 2009 Dec;94(12):1153-60. PMID: 19748969                                                                                                                                   |
| BDNF    | rs10767664 | 11  | 27682562 | obesity, bmi | 0              | Rask-Andersen M et al. Molecular mechanisms underlying anorexia nervosa: focus on human gene association studies and systems controlling food intake. <i>Brain Res Rev</i> . 2010 Mar;62(2):147-64. PMID: 19931559                                                                                                                          |
| BDNF    | rs10767664 | 11  | 27682562 | obesity, bmi | 0              | Shugart YY et al. Two British women studies replicated the association between the Val66Met polymorphism in the brain-derived neurotrophic factor (BDNF) and BMI. <i>Eur J Hum Genet</i> . 2009 Aug;17(8):1050-5. PMID: 19209189                                                                                                            |
| BDNF    | rs10767664 | 11  | 27682562 | obesity, bmi | 0              | Uçeyler N et al. Lack of the serotonin transporter in mice reduces locomotor activity and leads to gender-dependent late onset obesity. <i>Int J Obes (Lond)</i> . 2010 Apr;34(4):701-11. PMID: 20084070                                                                                                                                    |
| BDNF    | rs10767664 | 11  | 27682562 | obesity, bmi | 0              | Wang C et al. Brain-derived neurotrophic factor (BDNF) in the hypothalamic ventromedial nucleus increases energy expenditure. <i>Brain Res</i> . 2010 Apr 14;. PMID: 20398635                                                                                                                                                               |
| BDNF    | rs10767664 | 11  | 27682562 | obesity, bmi | 0              | Wang C et al. Chronic administration of brain-derived neurotrophic factor in the hypothalamic paraventricular nucleus reverses obesity induced by high fat diet. <i>Am J Physiol Regul Integr Comp Physiol</i> . 2010 Feb 17;. PMID: 20164202                                                                                               |
| BDNF    | rs10767664 | 11  | 27682562 | obesity, bmi | 0              | Xu L et al. TrkB Agonist Antibody Dose-Dependently Raises Blood Pressure in Mice With Diet-Induced Obesity. <i>Am J Hypertens</i> . 2010 Mar 18;. PMID: 20300069                                                                                                                                                                            |
| BDNF    | rs10767664 | 11  | 27682562 | obesity, bmi | 0              | Yu Y et al. Energy-restricted pair-feeding normalizes low levels of brain- derived neurotrophic factor/tyrosine kinase B mRNA expression in the hippocampus, but not ventromedial hypothalamic nucleus, in diet-induced obese mice. <i>Neuroscience</i> . 2009 May 5;160(2):295-306. PMID: 19217934                                         |
| BDNF    | rs10767664 | 11  | 27682562 | obesity, bmi | 0              | Zhang XY et al. BDNF levels and genotype are associated with antipsychotic- induced weight gain in patients with chronic schizophrenia. <i>Neuropsychopharmacology</i> . 2008 Aug;33(9):2200-5. PMID: 17987059                                                                                                                              |
| NR1H3   | rs3817334  | 11  | 47607569 | no match     | 360,592        | Auboeuf D et al. Tissue distribution and quantification of the expression of mRNAs of peroxisome proliferator-activated receptors and liver X receptor- alpha in humans: no alteration in adipose tissue of obese and NIDDM patients. <i>Diabetes</i> . 1997 Aug;46(8):1319-27. PMID: 9231657                                               |
| NR1H3   | rs3817334  | 11  | 47607569 | no match     | 360,592        | Dahlman I et al. Liver X receptor gene polymorphisms and adipose tissue expression levels in obesity. <i>Pharmacogenet Genomics</i> . 2006 Dec;16(12):881-9. PMID: 17108812                                                                                                                                                                 |
| NR1H3   | rs3817334  | 11  | 47607569 | no match     | 360,592        | Jiang ZY et al. Increased expression of LXR alpha, ABCG5, ABCG8, and SR-BI in the liver from normolipidemic, nonobese Chinese gallstone patients. <i>J Lipid Res</i> . 2008 Feb;49(2):464-72. PMID: 18007013                                                                                                                                |
| NR1H3   | rs3817334  | 11  | 47607569 | no match     | 360,592        | Phelan CA et al. Selective partial agonism of liver X receptor alpha is related to differential corepressor recruitment. <i>Mol Endocrinol</i> . 2008 Oct;22(10):2241-9. PMID: 18669643                                                                                                                                                     |
| RACGAP1 | rs7138803  | 12  | 48533735 | no match     | 135,477        | Niyya F et al. Inhibition of cyclin-dependent kinase 1 induces cytokinesis without chromosome segregation in an ECT2 and MgcRacGAP-dependent manner. <i>J Biol Chem</i> . 2005 Oct 28;280(43):36502-9. PMID: 16118207                                                                                                                       |
| RACGAP1 | rs7138803  | 12  | 48533735 | no match     | 135,477        | Obuse C et al. Proteomics analysis of the centromere complex from HeLa interphase cells: UV-damaged DNA binding protein 1 (DDB-1) is a component of the CEN-complex, while BMI-1 is transiently co-localized with the centromeric region in interphase. <i>Genes Cells</i> . 2004 Feb;9(2):105-20. PMID: 15009096                           |



| Gene    | index SNP  | Chr | Position | OMIM terms | Distance (nt)* | Pubmed hit with search terms "obesity" or "BMI"                                                                                                                                                                                                                                                                                                                                |
|---------|------------|-----|----------|------------|----------------|--------------------------------------------------------------------------------------------------------------------------------------------------------------------------------------------------------------------------------------------------------------------------------------------------------------------------------------------------------------------------------|
| GPD1    | rs7138803  | 12  | 48533735 | no match   | 250,333        | Guindalini C et al. The influence of obstructive sleep apnea on the expression of glycerol-3-phosphate dehydrogenase 1 gene. <i>Exp Biol Med</i> (Maywood). 2010 Jan;235(1):52-6. PMID: 20404019                                                                                                                                                                               |
| GPD1    | rs7138803  | 12  | 48533735 | no match   | 250,333        | Park JJ et al. GRB14, GPD1, and GDF8 as potential network collaborators in weight loss-induced improvements in insulin action in human skeletal muscle. <i>Physiol Genomics</i> . 2006 Oct 11;27(2):114-21. PMID: 16849634                                                                                                                                                     |
| GPD1    | rs7138803  | 12  | 48533735 | no match   | 250,333        | Poulain-Godefroy O et al. Inflammation is associated with a decrease of lipogenic factors in omental fat in women. <i>Am J Physiol Regul Integr Comp Physiol</i> . 2008 Jul;295(1):R1-7. PMID: 18448614                                                                                                                                                                        |
| GPD1    | rs7138803  | 12  | 48533735 | no match   | 250,333        | Swierczynski J et al. Enhanced glycerol 3-phosphate dehydrogenase activity in adipose tissue of obese humans. <i>Mol Cell Biochem</i> . 2003 Dec;254(1-2):55-9. PMID: 14674682                                                                                                                                                                                                 |
| GP2     | rs12444979 | 16  | 19841101 | no match   | 388,211        | Berkane AA et al. Proteomic of lipid rafts in the exocrine pancreas from diet-induced obese rats. <i>Biochem Biophys Res Commun</i> . 2007 Apr 13;355(3):813-9. PMID: 17320817                                                                                                                                                                                                 |
| SH2B1   | rs7359397  | 16  | 28793160 | obesity    | 133            | Bochukova EG et al. Large, rare chromosomal deletions associated with severe early-onset obesity. <i>Nature</i> . 2010 Feb 4;463(7281):666-70. PMID: 19966786                                                                                                                                                                                                                  |
| SH2B1   | rs7359397  | 16  | 28793160 | obesity    | 133            | Burwell RG et al. Pathogenesis of adolescent idiopathic scoliosis in girls - a double neuro-osseous theory involving disharmony between two nervous systems, somatic and autonomic expressed in the spine and trunk: possible dependency on sympathetic nervous system and hormones with implications for medical therapy. <i>Scoliosis</i> . 2009 Oct 31;4:24. PMID: 19878575 |
| SH2B1   | rs7359397  | 16  | 28793160 | obesity    | 133            | Duan C et al. [Molecular mechanism of SH2B1 in regulating JAK2/IRS2 during obesity development.]. <i>Zhong Nan Da Xue Xue Bao Yi Xue Ban</i> . 2010 Mar;35(3):209-14. PMID: 20360640                                                                                                                                                                                           |
| SH2B1   | rs7359397  | 16  | 28793160 | obesity    | 133            | Ghanayem BI et al. Diet-induced obesity in male mice is associated with reduced fertility and potentiation of acrylamide-induced reproductive toxicity. <i>Biol Reprod</i> . 2010 Jan;82(1):96-104. PMID: 19696015                                                                                                                                                             |
| SH2B1   | rs7359397  | 16  | 28793160 | obesity    | 133            | Maures TJ et al. SH2B1 (SH2-B) and JAK2: a multifunctional adaptor protein and kinase made for each other. <i>Trends Endocrinol Metab</i> . 2007 Jan- Feb;18(1):38-45. PMID: 17140804                                                                                                                                                                                          |
| SH2B1   | rs7359397  | 16  | 28793160 | obesity    | 133            | Morris DL et al. Recent advances in understanding leptin signaling and leptin resistance. <i>Am J Physiol Endocrinol Metab</i> . 2009 Dec;297(6):E1247-59. PMID: 19724019                                                                                                                                                                                                      |
| SH2B1   | rs7359397  | 16  | 28793160 | obesity    | 133            | Nelms K et al. Alternative splicing, gene localization, and binding of SH2-B to the insulin receptor kinase domain. <i>Mamm Genome</i> . 1999 Dec;10(12):1160-7. PMID: 10594240                                                                                                                                                                                                |
| SH2B1   | rs7359397  | 16  | 28793160 | obesity    | 133            | Ren D et al. Neuronal SH2B1 is essential for controlling energy and glucose homeostasis. <i>J Clin Invest</i> . 2007 Feb;117(2):397-406. PMID: 17235396                                                                                                                                                                                                                        |
| SH2B1   | rs7359397  | 16  | 28793160 | obesity    | 133            | Rider L et al. Adapter protein SH2B1beta cross-links actin filaments and regulates actin cytoskeleton. <i>Mol Endocrinol</i> . 2009 Jul;23(7):1065-76. PMID: 19342444                                                                                                                                                                                                          |
| SH2B1   | rs7359397  | 16  | 28793160 | obesity    | 133            | Senior K et al. Another piece in the molecular puzzle of obesity. <i>Drug Discov Today</i> . 2005 Nov 15;10(22):1488. PMID: 16257366                                                                                                                                                                                                                                           |
| SH2B1   | rs7359397  | 16  | 28793160 | obesity    | 133            | Song W et al. SH2B regulation of growth, metabolism, and longevity in both insects and mammals. <i>Cell Metab</i> . 2010 May 5;11(5):427-37. PMID: 20417156                                                                                                                                                                                                                    |
| CD19    | rs7359397  | 16  | 28793160 | no match   | 57,601         | Asprey JM et al. Effect on immune indices of preoperative intravenous glutamine dipeptide supplementation in malnourished abdominal surgery patients in the preoperative and postoperative periods. <i>Nutrition</i> . 2009 Sep;25(9):920-5. PMID: 19647623                                                                                                                    |
| CD19    | rs7359397  | 16  | 28793160 | no match   | 57,601         | Backé E et al. Immunological biomarkers in salt miners exposed to salt dust, diesel exhaust and nitrogen oxides. <i>Int Arch Occup Environ Health</i> . 2004 Jun;77(5):319-27. PMID: 15197551                                                                                                                                                                                  |
| CD19    | rs7359397  | 16  | 28793160 | no match   | 57,601         | Başoğlu OK et al. [T-lymphocyte subgroups and tuberculin skin test reactivity in patients with chronic renal failure]. <i>Tuberk Toraks</i> . 2006;54(1):5-10. PMID: 16615011                                                                                                                                                                                                  |
| CD19    | rs7359397  | 16  | 28793160 | no match   | 57,601         | Grzegorzewska AE et al. Total lymphocyte count and subpopulation lymphocyte counts in relation to dietary intake and nutritional status of peritoneal dialysis patients. <i>Adv Perit Dial</i> . 2005;21:35-40. PMID: 16686282                                                                                                                                                 |
| CD19    | rs7359397  | 16  | 28793160 | no match   | 57,601         | Haskell BD et al. The diabetes-prone NZO/HLLT strain. I. Immunophenotypic comparison to the related NZB/BINJ and NZW/LacJ strains. <i>Lab Invest</i> . 2002 Jul;82(7):833-42. PMID: 12118085                                                                                                                                                                                   |
| CD19    | rs7359397  | 16  | 28793160 | no match   | 57,601         | Hudson CA et al. The dietary supplement ephedrine induces beta-adrenergic mediated exacerbation of systemic lupus erythematosus in NZM391 mice. <i>Lupus</i> . 2005;14(4):293-307. PMID: 15864916                                                                                                                                                                              |
| CD19    | rs7359397  | 16  | 28793160 | no match   | 57,601         | Marcos A et al. Evaluation of nutritional status by immunologic assessment in bulimia nervosa: influence of body mass index and vomiting episodes. <i>Am J Clin Nutr</i> . 1997 Aug;66(2):491S-497S. PMID: 9250137                                                                                                                                                             |
| CD19    | rs7359397  | 16  | 28793160 | no match   | 57,601         | Martinka E et al. [Glutamic acid decarboxylase autoantibodies (antiGAD-Ab) in patients with non-insulin dependent diabetes mellitus (NIDDM)]. <i>Vnitr Lek</i> . 1998 Jan;44(1):17-22. PMID: 9750478                                                                                                                                                                           |
| CD19    | rs7359397  | 16  | 28793160 | no match   | 57,601         | Merhi ZO et al. Effect of bariatric surgery on peripheral blood lymphocyte subsets in women. <i>Surg Obes Relat Dis</i> . 2009 Mar-Apr;5(2):165-71. PMID: 18996763                                                                                                                                                                                                             |
| CD19    | rs7359397  | 16  | 28793160 | no match   | 57,601         | Santagostino A et al. An Italian national multicenter study for the definition of reference ranges for normal values of peripheral blood lymphocyte subsets in healthy adults. <i>Haematologica</i> . 1999 Jun;84(6):499-504. PMID: 10366792                                                                                                                                   |
| CD19    | rs7359397  | 16  | 28793160 | no match   | 57,601         | Sayarlioglu H et al. Nutritional status and immune functions in maintenance hemodialysis patients. <i>Mediators Inflamm</i> . 2006;2006(1):20264. PMID: 16864899                                                                                                                                                                                                               |
| SULT1A1 | rs7359397  | 16  | 28793160 | no match   | 250,793        | Glatt H et al. Pharmacogenetics of soluble sulfotransferases (SULTs). <i>Naunyn Schmiedebergs Arch Pharmacol</i> . 2004 Jan;369(1):55-68. PMID: 14600802                                                                                                                                                                                                                       |
| SULT1A1 | rs7359397  | 16  | 28793160 | no match   | 250,793        | Hu MB et al. [Study on the relationship between polymorphisms of genes (CYP17, CYP19 and SULT1A1) and susceptibility to breast cancer in Chinese women]. <i>Zhonghua Liu Xing Bing Xue Za Zhi</i> . 2006 Apr;27(4):351-5. PMID: 16875543                                                                                                                                       |
| SULT1A1 | rs7359397  | 16  | 28793160 | no match   | 250,793        | Maglich JM et al. The nuclear receptor CAR is a regulator of thyroid hormone metabolism during caloric restriction. <i>J Biol Chem</i> . 2004 May 7;279(19):19832-8. PMID: 15004031                                                                                                                                                                                            |

| Gene     | index SNP | Chr | Position | OMIM terms   | Distance (nt)* | Pubmed hit with search terms "obesity" or "BMI"                                                                                                                                                                                                                            |
|----------|-----------|-----|----------|--------------|----------------|----------------------------------------------------------------------------------------------------------------------------------------------------------------------------------------------------------------------------------------------------------------------------|
| SULT1A1  | rs7359397 | 16  | 28793160 | no match     | 250,793        | Yang G et al. Modifying effects of sulfotransferase 1A1 gene polymorphism on the association of breast cancer risk with body mass index or endogenous steroid hormones. <i>Breast Cancer Res Treat.</i> 2005 Nov;94(1):63-70. PMID: 16175316                               |
| APOB48R  | rs7359397 | 16  | 28793160 | no match     | 375,377        | Lumeng CN et al. Increased inflammatory properties of adipose tissue macrophages recruited during diet-induced obesity. <i>Diabetes.</i> 2007 Jan;56(1):16-23. PMID: 17192460                                                                                              |
| FTO      | rs1558902 | 16  | 52361075 | obesity      | 0              | Adeyemo A et al. FTO Genetic Variation and Association with Obesity in West Africans and African-Americans. <i>Diabetes.</i> 2010 Mar 18;. PMID: 20299471                                                                                                                  |
| FTO      | rs1558902 | 16  | 52361075 | obesity      | 0              | Attaoua R et al. Association of the FTO gene with obesity and the metabolic syndrome is independent of the IRS-2 gene in the female population of Southern France. <i>Diabetes Metab.</i> 2009 Dec;35(6):476-83. PMID: 19818665                                            |
| FTO      | rs1558902 | 16  | 52361075 | obesity      | 0              | Bassols J et al. Placental FTO expression relates to fetal growth. <i>Int J Obes (Lond).</i> 2010 Mar 30;. PMID: 20351740                                                                                                                                                  |
| FTO      | rs1558902 | 16  | 52361075 | obesity      | 0              | Chen HH et al. Severe obesity is associated with novel single nucleotide polymorphisms of the ESR1 and PPARgamma locus in Han Chinese. <i>Am J Clin Nutr.</i> 2009 Aug;90(2):255-62. PMID: 19491387                                                                        |
| FTO      | rs1558902 | 16  | 52361075 | obesity      | 0              | Grau K et al. Macronutrient-specific effect of FTO rs9939609 in response to a 10-week randomized hypo-energetic diet among obese Europeans. <i>Int J Obes (Lond).</i> 2009 Nov;33(11):1227-34. PMID: 19687793                                                              |
| FTO      | rs1558902 | 16  | 52361075 | obesity      | 0              | Han Z et al. Crystal structure of the FTO protein reveals basis for its substrate specificity. <i>Nature.</i> 2010 Apr 22;464(7292):1205-9. PMID: 20376003                                                                                                                 |
| FTO      | rs1558902 | 16  | 52361075 | obesity      | 0              | Hardy R et al. Life course variations in the associations between FTO and MC4R gene variants and body size. <i>Hum Mol Genet.</i> 2010 Feb 1;19(3):545-52. PMID: 19880856                                                                                                  |
| FTO      | rs1558902 | 16  | 52361075 | obesity      | 0              | Hinney A et al. From monogenic to polygenic obesity: recent advances. <i>Eur Child Adolesc Psychiatry.</i> 2010 Mar;19(3):297-310. PMID: 20127379                                                                                                                          |
| FTO      | rs1558902 | 16  | 52361075 | obesity      | 0              | Ho AJ et al. A commonly carried allele of the obesity-related FTO gene is associated with reduced brain volume in the healthy elderly. <i>Proc Natl Acad Sci U S A.</i> 2010 May 4;107(18):8404-9. PMID: 20404173                                                          |
| FTO      | rs1558902 | 16  | 52361075 | obesity      | 0              | Hubacek JA et al. A FTO variant and risk of acute coronary syndrome. <i>Clin Chim Acta.</i> 2010 Apr 1;. PMID: 20362563                                                                                                                                                    |
| FTO      | rs1558902 | 16  | 52361075 | obesity      | 0              | Karasawa S et al. Association of the common fat mass and obesity associated (FTO) gene polymorphism with obesity in a Japanese population. <i>Endocr J.</i> 2010;57(4):293-301. PMID: 20051647                                                                             |
| FTO      | rs1558902 | 16  | 52361075 | obesity      | 0              | Kowalska I et al. The FTO gene modifies weight, fat mass and insulin sensitivity in women with polycystic ovary syndrome, where its role may be larger than in other phenotypes. <i>Diabetes Metab.</i> 2009 Sep;35(4):328-31. PMID: 19625203                              |
| FTO      | rs1558902 | 16  | 52361075 | obesity      | 0              | Liem ET et al. Influence of common variants near INSIG2, in FTO, and near MC4R genes on overweight and the metabolic profile in adolescence: the TRAILS (TRacking Adolescents' Individual Lives Survey) Study. <i>Am J Clin Nutr.</i> 2010 Feb;91(2):321-8. PMID: 20007308 |
| FTO      | rs1558902 | 16  | 52361075 | obesity      | 0              | Meyre D et al. Prevalence of loss-of-function FTO mutations in lean and obese individuals. <i>Diabetes.</i> 2010 Jan;59(1):311-8. PMID: 19833892                                                                                                                           |
| FTO      | rs1558902 | 16  | 52361075 | obesity      | 0              | Pettersen E et al. Genetic heterogeneity in latent autoimmune diabetes is linked to various degrees of autoimmune activity: results from the Nord-Trøndelag Health Study. <i>Diabetes.</i> 2010 Jan;59(1):302-10. PMID: 19833889                                           |
| FTO      | rs1558902 | 16  | 52361075 | obesity      | 0              | Reinehr T et al. Aggravating effect of INSIG2 and FTO on overweight reduction in a one-year lifestyle intervention. <i>Arch Dis Child.</i> 2009 Dec;94(12):965-7. PMID: 19224890                                                                                           |
| FTO      | rs1558902 | 16  | 52361075 | obesity      | 0              | Rendo T et al. Effects of the FTO Gene on Lifestyle Intervention Studies in Children. <i>Obes Facts.</i> 2009;2(6):393-399. PMID: 20090391                                                                                                                                 |
| FTO      | rs1558902 | 16  | 52361075 | obesity      | 0              | Rodríguez-López R et al. [Association of FTO gene polymorphisms and morbid obesity in the population of Extremadura (Spain)]. <i>Endocrinol Nutr.</i> 2010 Apr 23;. PMID: 20418190                                                                                         |
| FTO      | rs1558902 | 16  | 52361075 | obesity      | 0              | Rutters F et al. Genetic associations with acute stress-related changes in eating in the absence of hunger. <i>Patient Educ Couns.</i> 2010 Apr 19;. PMID: 20409671                                                                                                        |
| FTO      | rs1558902 | 16  | 52361075 | obesity      | 0              | Speakman JR et al. FTO effect on energy demand versus food intake. <i>Nature.</i> 2010 Apr 1;464(7289):E1; discussion E2. PMID: 20360686                                                                                                                                   |
| FTO      | rs1558902 | 16  | 52361075 | obesity      | 0              | Switonski M et al. Genetics of fat tissue accumulation in pigs: a comparative approach. <i>J Appl Genet.</i> 2010;51(2):153-168. PMID: 20453303                                                                                                                            |
| FTO      | rs1558902 | 16  | 52361075 | obesity      | 0              | Tung YC et al. Hypothalamic-specific manipulation of Fto, the ortholog of the human obesity gene FTO, affects food intake in rats. <i>PLoS One.</i> 2010 Jan 19;5(1):e8771. PMID: 20098739                                                                                 |
| FTO      | rs1558902 | 16  | 52361075 | obesity      | 0              | van den Berg L et al. Investigation of a patient with a partial trisomy 16q including the fat mass and obesity associated gene (FTO): fine mapping and FTO gene expression study. <i>Am J Med Genet A.</i> 2010 Mar;152A(3):630-7. PMID: 20186806                          |
| FTO      | rs1558902 | 16  | 52361075 | obesity      | 0              | Zhang G et al. Common SNPs in FTO gene are associated with obesity related anthropometric traits in an island population from the eastern Adriatic coast of Croatia. <i>PLoS One.</i> 2010 Apr 28;5(4):e10375. PMID: 20442772                                              |
| RPGRIP1L | rs1558902 | 16  | 52361075 | no match     | 65,803         | Klötting N et al. Inverse relationship between obesity and FTO gene expression in visceral adipose tissue in humans. <i>Diabetologia.</i> 2008 Apr;51(4):641-7. PMID: 18251005                                                                                             |
| RPGRIP1L | rs1558902 | 16  | 52361075 | no match     | 65,803         | Sen Gupta P et al. Can faulty antennae increase adiposity? The link between cilia proteins and obesity. <i>J Endocrinol.</i> 2009 Dec;203(3):327-36. PMID: 19460851                                                                                                        |
| RPGRIP1L | rs1558902 | 16  | 52361075 | no match     | 65,803         | Stratigopoulos G et al. Regulation of Fto/Ftm gene expression in mice and humans. <i>Am J Physiol Regul Integr Comp Physiol.</i> 2008 Apr;294(4):R1185-96. PMID: 18256137                                                                                                  |
| RBL2     | rs1558902 | 16  | 52361075 | no match     | 278,014        | Jowett JB et al. Genetic variation at the FTO locus influences RBL2 gene expression. <i>Diabetes.</i> 2010 Mar;59(3):726-32. PMID: 20009087                                                                                                                                |
| MC4R     | rs571312  | 18  | 55990749 | obesity, bmi | 198,795        | Alfieri A et al. Functional analysis of melanocortin-4-receptor mutants identified in severely obese subjects living in Southern Italy. <i>Gene.</i> 2010 Jun 1;457(1-2):35-41. PMID: 20214954                                                                             |
| MC4R     | rs571312  | 18  | 55990749 | obesity, bmi | 198,795        | Atalayer D et al. Food demand and meal size in mice with single or combined disruption of melanocortin type 3 and 4 receptors. <i>Am J Physiol Regul Integr Comp Physiol.</i> 2010 Apr 7;. PMID: 20375267                                                                  |
| MC4R     | rs571312  | 18  | 55990749 | obesity, bmi | 198,795        | Calton MA et al. Association of functionally significant Melanocortin-4 but not Melanocortin-3 receptor mutations with severe adult obesity in a large North American case-control study. <i>Hum Mol Genet.</i> 2009 Mar 15;18(6):1140-7. PMID: 19091795                   |

| Gene  | index SNP | Chr | Position | OMIM terms   | Distance (nt)* | Pubmed hit with search terms "obesity" or "BMI"                                                                                                                                                                                                                       |
|-------|-----------|-----|----------|--------------|----------------|-----------------------------------------------------------------------------------------------------------------------------------------------------------------------------------------------------------------------------------------------------------------------|
| MC4R  | rs571312  | 18  | 55990749 | obesity, bmi | 198,795        | Chen HH et al. Severe obesity is associated with novel single nucleotide polymorphisms of the ESR1 and PPARgamma locus in Han Chinese. <i>Am J Clin Nutr.</i> 2009 Aug;90(2):255-62. PMID: 19491387                                                                   |
| MC4R  | rs571312  | 18  | 55990749 | obesity, bmi | 198,795        | Cole SA et al. Evidence that multiple genetic variants of MC4R play a functional role in the regulation of energy expenditure and appetite in Hispanic children. <i>Am J Clin Nutr.</i> 2010 Jan;91(1):191-9. PMID: 19889825                                          |
| MC4R  | rs571312  | 18  | 55990749 | obesity, bmi | 198,795        | Figueroa KP et al. Genetic variance in the spinocerebellar ataxia type 2 (ATXN2) gene in children with severe early onset obesity. <i>PLoS One.</i> 2009 Dec 14;4(12):e8280. PMID: 20016785                                                                           |
| MC4R  | rs571312  | 18  | 55990749 | obesity, bmi | 198,795        | Grant SF et al. Investigation of the locus near MC4R with childhood obesity in Americans of European and African ancestry. <i>Obesity (Silver Spring).</i> 2009 Jul;17(7):1461-5. PMID: 19265794                                                                      |
| MC4R  | rs571312  | 18  | 55990749 | obesity, bmi | 198,795        | Guan XM et al. Regulation of energy homeostasis by bombesin receptor subtype-3: selective receptor agonists for the treatment of obesity. <i>Cell Metab.</i> 2010 Feb 3;11(2):101-12. PMID: 20096642                                                                  |
| MC4R  | rs571312  | 18  | 55990749 | obesity, bmi | 198,795        | Hardy R et al. Life course variations in the associations between FTO and MC4R gene variants and body size. <i>Hum Mol Genet.</i> 2010 Feb 1;19(3):545-52. PMID: 19880856                                                                                             |
| MC4R  | rs571312  | 18  | 55990749 | obesity, bmi | 198,795        | Hetherington MM et al. Gene-environment interactions in obesity. <i>Forum Nutr.</i> 2010;63:195-203. PMID: 19955787                                                                                                                                                   |
| MC4R  | rs571312  | 18  | 55990749 | obesity, bmi | 198,795        | Hinney A et al. Three at one swoop!. <i>Obes Facts.</i> 2009;2(1):3-8. PMID: 20054198                                                                                                                                                                                 |
| MC4R  | rs571312  | 18  | 55990749 | obesity, bmi | 198,795        | Hochberg I et al. Hypothalamic Obesity. <i>Endocr Dev.</i> 2010;17:185-196. PMID: 19955767                                                                                                                                                                            |
| MC4R  | rs571312  | 18  | 55990749 | obesity, bmi | 198,795        | Kang SJ et al. Genome-wide association of anthropometric traits in African- and African-derived populations. <i>Hum Mol Genet.</i> 2010 May 6; PMID: 20400458                                                                                                         |
| MC4R  | rs571312  | 18  | 55990749 | obesity, bmi | 198,795        | Kring SI et al. Common variants near MC4R in relation to body fat, body fat distribution, metabolic traits and energy expenditure. <i>Int J Obes (Lond).</i> 2010 Jan;34(1):182-9. PMID: 19844209                                                                     |
| MC4R  | rs571312  | 18  | 55990749 | obesity, bmi | 198,795        | Krishna R et al. Potent and selective agonism of the melanocortin receptor 4 with MK-0493 does not induce weight loss in obese human subjects: energy intake predicts lack of weight loss efficacy. <i>Clin Pharmacol Ther.</i> 2009 Dec;86(6):659-66. PMID: 19741604 |
| MC4R  | rs571312  | 18  | 55990749 | obesity, bmi | 198,795        | Park TJ et al. High-level expression and purification of the second transmembrane domain of wild-type and mutant human melanocortin-4 receptor for solid-state NMR structural studies. <i>Protein Expr Purif.</i> 2008 Dec;62(2):139-45. PMID: 18809499               |
| MC4R  | rs571312  | 18  | 55990749 | obesity, bmi | 198,795        | Pichler M et al. Association of the melanocortin-4 receptor V103I polymorphism with dietary intake in severely obese persons. <i>Am J Clin Nutr.</i> 2008 Sep;88(3):797-800. PMID: 18779298                                                                           |
| MC4R  | rs571312  | 18  | 55990749 | obesity, bmi | 198,795        | Rask-Andersen M et al. Molecular mechanisms underlying anorexia nervosa: focus on human gene association studies and systems controlling food intake. <i>Brain Res Rev.</i> 2010 Mar;62(2):147-64. PMID: 19931559                                                     |
| MC4R  | rs571312  | 18  | 55990749 | obesity, bmi | 198,795        | Rediger A et al. Heterodimerization of Hypothalamic G-Protein-Coupled Receptors Involved in Weight Regulation. <i>Obes Facts.</i> 2009;2(2):80-86. PMID: 20054210                                                                                                     |
| MC4R  | rs571312  | 18  | 55990749 | obesity, bmi | 198,795        | Roth CL et al. A novel melanocortin-4 receptor gene mutation in a female patient with severe childhood obesity. <i>Endocrine.</i> 2009 Aug;36(1):52-9. PMID: 19214805                                                                                                 |
| MC4R  | rs571312  | 18  | 55990749 | obesity, bmi | 198,795        | Sayk F et al. Sympathetic function in human carriers of melanocortin-4 receptor gene mutations. <i>J Clin Endocrinol Metab.</i> 2010 Apr;95(4):1998-2002. PMID: 20147580                                                                                              |
| MC4R  | rs571312  | 18  | 55990749 | obesity, bmi | 198,795        | Stokić E et al. Polymorphism Val103Ile of the melanocortin-4 receptor gene in the Serbian population. <i>Mol Biol Rep.</i> 2010 Jan;37(1):33-7. PMID: 19283510                                                                                                        |
| MC4R  | rs571312  | 18  | 55990749 | obesity, bmi | 198,795        | Switonski M et al. Genetics of fat tissue accumulation in pigs: a comparative approach. <i>J Appl Genet.</i> 2010;51(2):153-168. PMID: 20453303                                                                                                                       |
| MC4R  | rs571312  | 18  | 55990749 | obesity, bmi | 198,795        | Tan K et al. Functional characterization and structural modeling of obesity associated mutations in the melanocortin 4 receptor. <i>Endocrinology.</i> 2009 Jan;150(1):114-25. PMID: 18801902                                                                         |
| MC4R  | rs571312  | 18  | 55990749 | obesity, bmi | 198,795        | Tao YX et al. The Melanocortin-4 Receptor: Physiology, Pharmacology, and Pathophysiology. <i>Endocr Rev.</i> 2010 Feb 26; PMID: 20190196                                                                                                                              |
| MC4R  | rs571312  | 18  | 55990749 | obesity, bmi | 198,795        | Tolson KP et al. Postnatal Sim1 deficiency causes hyperphagic obesity and reduced Mc4r and oxytocin expression. <i>J Neurosci.</i> 2010 Mar 10;30(10):3803-12. PMID: 20220015                                                                                         |
| MC4R  | rs571312  | 18  | 55990749 | obesity, bmi | 198,795        | Yurtcu E et al. Melanocortin-4 receptor gene polymorphisms in obese patients. <i>Biochem Genet.</i> 2009 Apr;47(3-4):295-300. PMID: 19184404                                                                                                                          |
| CEBPG | rs29941   | 19  | 39001372 | no match     | 435,940        | Szczerbal I et al. Chromosomal localization of nine porcine genes encoding transcription factors involved in adipogenesis. <i>Cytogenet Genome Res.</i> 2008;121(1):50-4. PMID: 18544926                                                                              |
| GIPR  | rs2287019 | 19  | 50894012 | obesity      | 16,455         | Fulurija A et al. Vaccination against GIP for the treatment of obesity. <i>PLoS One.</i> 2008 Sep 9;3(9):e3163. PMID: 18779862                                                                                                                                        |
| GIPR  | rs2287019 | 19  | 50894012 | obesity      | 16,455         | Hansotia T et al. Extrapancreatic incretin receptors modulate glucose homeostasis, body weight, and energy expenditure. <i>J Clin Invest.</i> 2007 Jan;117(1):143-52. PMID: 17187081                                                                                  |
| GIPR  | rs2287019 | 19  | 50894012 | obesity      | 16,455         | Harada N et al. A novel GIP receptor splice variant influences GIP sensitivity of pancreatic beta-cells in obese mice. <i>Am J Physiol Endocrinol Metab.</i> 2008 Jan;294(1):E61-8. PMID: 17971513                                                                    |
| GIPR  | rs2287019 | 19  | 50894012 | obesity      | 16,455         | Isken F et al. Deficiency of glucose-dependent insulinotropic polypeptide receptor prevents ovariectomy-induced obesity in mice. <i>Am J Physiol Endocrinol Metab.</i> 2008 Aug;295(2):E350-5. PMID: 18505834                                                         |
| GIPR  | rs2287019 | 19  | 50894012 | obesity      | 16,455         | Miyawaki K et al. Inhibition of gastric inhibitory polypeptide signaling prevents obesity. <i>Nat Med.</i> 2002 Jul;8(7):738-42. PMID: 12068290                                                                                                                       |
| GIPR  | rs2287019 | 19  | 50894012 | obesity      | 16,455         | Naitoh R et al. Inhibition of GIP signaling modulates adiponectin levels under high-fat diet in mice. <i>Biochem Biophys Res Commun.</i> 2008 Nov 7;376(1):21-5. PMID: 18723001                                                                                       |
| GIPR  | rs2287019 | 19  | 50894012 | obesity      | 16,455         | Prabakaran D et al. Glucose-dependent insulinotropic polypeptide stimulates the proliferation of colorectal cancer cells. <i>Regul Pept.</i> 2010 Apr 28; PMID: 20433877                                                                                              |
| GIPR  | rs2287019 | 19  | 50894012 | obesity      | 16,455         | Rudovich N et al. GIP receptor mRNA expression in different fat tissue depots in postmenopausal non-diabetic women. <i>Regul Pept.</i> 2007 Aug 16;142(3):138-45. PMID: 17395281                                                                                      |
| GIPR  | rs2287019 | 19  | 50894012 | obesity      | 16,455         | Song DH et al. Glucose-dependent insulinotropic polypeptide enhances adipocyte development and glucose uptake in part through Akt activation. <i>Gastroenterology.</i> 2007 Dec;133(6):1796-805. PMID: 18054552                                                       |

| Gene   | index SNP | Chr | Position | OMIM terms | Distance (nt)* | Pubmed hit with search terms "obesity" or "BMI"                                                                                                                                                                                                                |
|--------|-----------|-----|----------|------------|----------------|----------------------------------------------------------------------------------------------------------------------------------------------------------------------------------------------------------------------------------------------------------------|
| GIPR   | rs2287019 | 19  | 50894012 | obesity    | 16,455         | Yamada Y et al. Physiology of GIP--a lesson from GIP receptor knockout mice. <i>Horm Metab Res.</i> 2004 Nov-Dec;36(11-12):771-4. PMID: 15655707                                                                                                               |
| GIPR   | rs2287019 | 19  | 50894012 | obesity    | 16,455         | Zhou H et al. Gastric inhibitory polypeptide modulates adiposity and fat oxidation under diminished insulin action. <i>Biochem Biophys Res Commun.</i> 2005 Sep 30;335(3):937-42. PMID: 16105663                                                               |
| DMPK   | rs2287019 | 19  | 50894012 | no match   | 70,804         | Block MH et al. Discovery and optimization of a series of carbazole ureas as NPY5 antagonists for the treatment of obesity. <i>J Med Chem.</i> 2002 Aug 1;45(16):3509-23. PMID: 12139462                                                                       |
| DMPK   | rs2287019 | 19  | 50894012 | no match   | 70,804         | Sun L et al. An in vivo microdialysis coupled with liquid chromatography/tandem mass spectrometry study of cortisol metabolism in monkey adipose tissue. <i>Anal Biochem.</i> 2008 Oct 15;381(2):214-23. PMID: 18638442                                        |
| FOXA3  | rs2287019 | 19  | 50894012 | no match   | 165,346        | Brannian JD et al. Pioglitazone administration alters ovarian gene expression in aging obese lethal yellow mice. <i>Reprod Biol Endocrinol.</i> 2008 Mar 18;6:10. PMID: 18348723                                                                               |
| VASP   | rs2287019 | 19  | 50894012 | no match   | 171,932        | Cuisset T et al. Relationship between aspirin and clopidogrel responses in acute coronary syndrome and clinical predictors of non response. <i>Thromb Res.</i> 2009 Feb;123(4):597-603. PMID: 18499233                                                         |
| VASP   | rs2287019 | 19  | 50894012 | no match   | 171,932        | Rider L et al. Adapter protein SH2B1beta cross-links actin filaments and regulates actin cytoskeleton. <i>Mol Endocrinol.</i> 2009 Jul;23(7):1065-76. PMID: 19342444                                                                                           |
| VASP   | rs2287019 | 19  | 50894012 | no match   | 171,932        | Russo I et al. Platelet resistance to the antiaggregatory cyclic nucleotides in central obesity involves reduced phosphorylation of vasodilator-stimulated phosphoprotein. <i>Clin Chem.</i> 2007 Jun;53(6):1053-60. PMID: 17463178                            |
| NANOS2 | rs2287019 | 19  | 50894012 | no match   | 214,301        | Ding F et al. Neonatal maternal deprivation response and developmental changes in gene expression revealed by hypothalamic gene expression profiling in mice. <i>PLoS One.</i> 2010 Feb 24;5(2):e9402. PMID: 20195375                                          |
| FOSB   | rs2287019 | 19  | 50894012 | no match   | 223,735        | Rowe GC et al. Increased energy expenditure and insulin sensitivity in the high bone mass DeltaFosB transgenic mice. <i>Endocrinology.</i> 2009 Jan;150(1):135-43. PMID: 18772235                                                                              |
| FOSB   | rs2287019 | 19  | 50894012 | no match   | 223,735        | Teegarden SL et al. Delta FosB-mediated alterations in dopamine signaling are normalized by a palatable high-fat diet. <i>Biol Psychiatry.</i> 2008 Dec 1;64(11):941-50. PMID: 18657800                                                                        |
| ERCC1  | rs2287019 | 19  | 50894012 | no match   | 274,995        | Borrmann L et al. High mobility group A2 protein and its derivatives bind a specific region of the promoter of DNA repair gene ERCC1 and modulate its activity. <i>Nucleic Acids Res.</i> 2003 Dec 1;31(23):6841-51. PMID: 14627817                            |
| ERCC1  | rs2287019 | 19  | 50894012 | no match   | 274,995        | Hooker S et al. NAT2 and NER genetic variants and sporadic prostate cancer susceptibility in African Americans. <i>Prostate Cancer Prostatic Dis.</i> 2008;11(4):349-56. PMID: 18026184                                                                        |
| ERCC1  | rs2287019 | 19  | 50894012 | no match   | 274,995        | Weiss JM et al. Nucleotide excision repair genotype and the incidence of endometrial cancer: effect of other risk factors on the association. <i>Gynecol Oncol.</i> 2006 Dec;103(3):891-6. PMID: 16806437                                                      |
| ERCC1  | rs2287019 | 19  | 50894012 | no match   | 274,995        | Zhou PK et al. Interaction between viral proteins and hosts and its disturbance in the cellular responses to ionising radiation. <i>Int J Radiat Biol.</i> 2009 Jul;85(7):587-97. PMID: 19479603                                                               |
| ERCC2  | rs2287019 | 19  | 50894012 | no match   | 328,327        | Lee SA et al. Obesity and genetic polymorphism of ERCC2 and ERCC4 as modifiers of risk of breast cancer. <i>Exp Mol Med.</i> 2005 Apr 30;37(2):86-90. PMID: 15886521                                                                                           |
| ERCC2  | rs2287019 | 19  | 50894012 | no match   | 328,327        | Lin J et al. Case-control analysis of nucleotide excision repair pathway and the risk of renal cell carcinoma. <i>Carcinogenesis.</i> 2008 Nov;29(11):2112-9. PMID: 18711149                                                                                   |
| ERCC2  | rs2287019 | 19  | 50894012 | no match   | 328,327        | Weiss JM et al. Nucleotide excision repair genotype and the incidence of endometrial cancer: effect of other risk factors on the association. <i>Gynecol Oncol.</i> 2006 Dec;103(3):891-6. PMID: 16806437                                                      |
| GRLF1  | rs3810291 | 19  | 52260843 | no match   | 60,670         | Rutters F et al. Leptin-adiposity relationship changes, plus behavioral and parental factors, are involved in the development of body weight in a Dutch children cohort. <i>Physiol Behav.</i> 2008 Mar 18;93(4-5):967-74. PMID: 18282590                      |
| GRLF1  | rs3810291 | 19  | 52260843 | no match   | 60,670         | Vogels N et al. Relation of weight maintenance and dietary restraint to peroxisome proliferator-activated receptor gamma2, glucocorticoid receptor, and ciliary neurotrophic factor polymorphisms. <i>Am J Clin Nutr.</i> 2005 Oct;82(4):740-6. PMID: 16210701 |
| GPR77  | rs3810291 | 19  | 52260843 | no match   | 271,368        | MacLaren RE et al. Association of adipocyte genes with ASP expression: a microarray analysis of subcutaneous and omental adipose tissue in morbidly obese subjects. <i>BMC Med Genomics.</i> 2010 Jan 27;3:3. PMID: 20105310                                   |
| GPR77  | rs3810291 | 19  | 52260843 | no match   | 271,368        | Paglialunga S et al. Reduced adipose tissue triglyceride synthesis and increased muscle fatty acid oxidation in C5L2 knockout mice. <i>J Endocrinol.</i> 2007 Aug;194(2):293-304. PMID: 17641279                                                               |
| GPR77  | rs3810291 | 19  | 52260843 | no match   | 271,368        | Wen Y et al. Palmitate and oleate induction of acylation stimulating protein resistance in 3T3-L1 adipocytes and preadipocytes. <i>J Cell Biochem.</i> 2008 May 15;104(2):391-401. PMID: 18004729                                                              |
| GPR77  | rs3810291 | 19  | 52260843 | no match   | 271,368        | Wen Y et al. Sex steroid hormones induce acylation stimulating protein resistance in 3T3-L1 adipocytes. <i>J Cell Biochem.</i> 2008 Oct 1;105(2):404-13. PMID: 18615583                                                                                        |
| NAPA   | rs3810291 | 19  | 52260843 | no match   | 421,860        | Balducci S et al. Exercise training can modify the natural history of diabetic peripheral neuropathy. <i>J Diabetes Complications.</i> 2006 Jul-Aug;20(4):216-23. PMID: 16798472                                                                               |
| NAPA   | rs3810291 | 19  | 52260843 | no match   | 421,860        | Brillon DJ et al. Mechanism of defective insulin-receptor kinase activity in NIDDM. Evidence for two receptor populations. <i>Diabetes.</i> 1989 Mar;38(3):397-403. PMID: 2465197                                                                              |
| NAPA   | rs3810291 | 19  | 52260843 | no match   | 421,860        | Christoff PB et al. Procainamide disposition in obesity. <i>Drug Intell Clin Pharm.</i> 1983 Jul-Aug;17(7-8):516-22. PMID: 6191939                                                                                                                             |
| NAPA   | rs3810291 | 19  | 52260843 | no match   | 421,860        | Zhou D et al. Genetics of metabolic variations between <i>Yersinia pestis</i> biovars and the proposal of a new biovar, <i>microtus</i> . <i>J Bacteriol.</i> 2004 Aug;186(15):5147-52. PMID: 15262951                                                         |

\* Distance between SNP and gene

## Supplementary Note

**Supplementary Note - Table 13** Assessment of population-stratification by comparison of effect sizes and directions of association between family-based data from Framingham and overall meta-analysis using the QFAM -- within procedure from PLINK.

**Supplementary Note - Table 13 -- Assessment of population-stratification by comparison of effect sizes and directions of association between family-based data from Framingham and overall meta-analysis using the QFAM --within procedure from PLINK.**

| SNP                                     | Nearest gene    | Chr | Position**<br>(bp) | Effect<br>Allele | Framingham |         |         | Overall meta-analysis |          | Consistency of<br>direction | Effect size    |
|-----------------------------------------|-----------------|-----|--------------------|------------------|------------|---------|---------|-----------------------|----------|-----------------------------|----------------|
|                                         |                 |     |                    |                  | N          | beta    | P-value | beta                  | P-value  |                             |                |
| <b>Previous BMI loci</b>                |                 |     |                    |                  |            |         |         |                       |          |                             |                |
| rs1558902                               | <i>FTO</i>      | 16  | 52,361,075         | A                | 5,507      | 0.1028  | 6.1E-04 | 0.0819                | 2.3E-111 | Same                        | Fram > Overall |
| rs2867125                               | <i>TMEM18</i>   | 2   | 612,827            | T                | 5,507      | -0.0016 | 9.7E-01 | 0.0658                | 3.7E-46  | Opposite                    | Overall > Fram |
| rs571312                                | <i>MC4R</i>     | 18  | 55,990,749         | A                | 5,504      | 0.0392  | 2.9E-01 | 0.0546                | 2.2E-40  | Same                        | Overall > Fram |
| rs10938397                              | <i>GNPDA2</i>   | 4   | 44,877,284         | A                | 5,423      | 0.0939  | 1.1E-03 | 0.0411                | 1.6E-29  | Same                        | Fram > Overall |
| rs10767664                              | <i>BDNF</i>     | 11  | 27,682,562         | A                | 5,507      | -0.0128 | 7.3E-01 | 0.0438                | 2.7E-25  | Opposite                    | Overall > Fram |
| rs2815752                               | <i>NEGR1</i>    | 1   | 72,585,028         | A                | 5,503      | 0.0807  | 8.2E-03 | 0.0332                | 3.0E-20  | Same                        | Fram > Overall |
| rs7359397                               | <i>SH2B1</i>    | 16  | 28,793,160         | T                | 5,491      | 0.0383  | 2.1E-01 | 0.0319                | 9.5E-20  | Same                        | Fram > Overall |
| rs9816226                               | <i>ETV5</i>     | 3   | 187,317,193        | A                | 5,503      | 0.0691  | 6.9E-02 | 0.0405                | 1.7E-18  | Same                        | Fram > Overall |
| rs3817334                               | <i>MTCH2</i>    | 11  | 47,607,569         | T                | 5,507      | 0.0211  | 4.7E-01 | 0.0248                | 1.2E-11  | Same                        | Overall > Fram |
| rs29941                                 | <i>KCTD15</i>   | 19  | 39,001,372         | A                | 5,506      | -0.0136 | 6.8E-01 | 0.0209                | 3.3E-08  | Opposite                    | Overall > Fram |
| <b>Previous waist &amp; weight loci</b> |                 |     |                    |                  |            |         |         |                       |          |                             |                |
| rs543874                                | <i>SEC16B</i>   | 1   | 176,156,103        | A                | 5,507      | 0.0861  | 2.5E-02 | 0.0455                | 7.7E-22  | Same                        | Fram > Overall |
| rs987237                                | <i>TFAP2B</i>   | 6   | 50,911,009         | A                | 5,487      | 0.0310  | 4.3E-01 | 0.0411                | 1.2E-19  | Same                        | Overall > Fram |
| rs7138803                               | <i>FAIM2</i>    | 12  | 48,533,735         | A                | 5,480      | 0.0416  | 1.9E-01 | 0.0304                | 1.6E-17  | Same                        | Fram > Overall |
| rs10150332                              | <i>NRXN3</i>    | 14  | 79,006,717         | T                | 5,507      | 0.0582  | 1.0E-01 | 0.0272                | 9.1E-10  | Same                        | Fram > Overall |
| <b>Newly identified BMI loci</b>        |                 |     |                    |                  |            |         |         |                       |          |                             |                |
| rs713586                                | <i>RBJ</i>      | 2   | 25,011,512         | T                | 5,483      | 0.0547  | 7.1E-02 | 0.0298                | 5.0E-20  | Same                        | Fram > Overall |
| rs12444979                              | <i>GPRC5B</i>   | 16  | 19,841,101         | T                | 5,502      | 0.0112  | 7.9E-01 | 0.0435                | 3.3E-21  | Same                        | Overall > Fram |
| rs2241423                               | <i>MAP2K5</i>   | 15  | 65,873,892         | A                | 5,507      | -0.0464 | 1.9E-01 | 0.0343                | 2.8E-18  | Opposite                    | Fram > Overall |
| rs2287019                               | <i>QPCTL</i>    | 19  | 50,894,012         | T                | 5,419      | 0.0746  | 5.1E-02 | 0.0350                | 7.6E-15  | Same                        | Fram > Overall |
| rs1514175                               | <i>TNNI3K</i>   | 1   | 74,764,232         | A                | 5,502      | 0.0280  | 3.5E-01 | 0.0235                | 2.5E-13  | Same                        | Fram > Overall |
| rs13107325                              | <i>SLC39A8</i>  | 4   | 103,407,732        | T                | 5,505      | 0.0964  | 5.5E-02 | 0.0497                | 7.1E-13  | Same                        | Fram > Overall |
| rs2112347                               | <i>FLJ35779</i> | 5   | 75,050,998         | T                | 5,501      | 0.0173  | 6.0E-01 | 0.0238                | 5.0E-13  | Same                        | Overall > Fram |
| rs10968576                              | <i>LRRN6C</i>   | 9   | 28,404,339         | A                | 5,507      | 0.0570  | 8.2E-02 | 0.0257                | 2.7E-13  | Same                        | Fram > Overall |
| rs3810291                               | <i>TMEM160</i>  | 19  | 52,260,843         | A                | 5,460      | -0.0217 | 5.1E-01 | 0.0239                | 1.2E-11  | Opposite                    | Overall > Fram |
| rs887912                                | <i>FANCL</i>    | 2   | 59,156,381         | T                | 5,505      | 0.0690  | 3.7E-02 | 0.0252                | 2.1E-13  | Same                        | Fram > Overall |
| rs13078807                              | <i>CADM2</i>    | 3   | 85,966,840         | A                | 5,501      | 0.0321  | 3.9E-01 | 0.0262                | 2.5E-11  | Same                        | Fram > Overall |
| rs11847697                              | <i>PRKD1</i>    | 14  | 29,584,863         | T                | 5,500      | 0.0193  | 7.9E-01 | 0.0536                | 2.2E-10  | Same                        | Overall > Fram |
| rs2890652                               | <i>LRP1B</i>    | 2   | 142,676,401        | T                | 5,498      | 0.0416  | 3.1E-01 | 0.0284                | 9.3E-11  | Same                        | Fram > Overall |
| rs1555543                               | <i>PTBP2</i>    | 1   | 96,717,385         | A                | 5,507      | 0.0664  | 3.1E-02 | 0.0188                | 3.1E-09  | Same                        | Fram > Overall |
| rs4771122                               | <i>MTIF3</i>    | 13  | 26,918,180         | A                | 5,504      | 0.0367  | 3.3E-01 | 0.0258                | 9.5E-10  | Same                        | Fram > Overall |
| rs4836133                               | <i>ZNF608</i>   | 5   | 124,360,002        | A                | 5,445      | 0.0149  | 6.1E-01 | 0.0193                | 1.6E-09  | Same                        | Overall > Fram |
| rs4929949                               | <i>RPL27A</i>   | 11  | 8,561,169          | T                | 5,507      | 0.0020  | 9.4E-01 | 0.0182                | 3.5E-09  | Same                        | Overall > Fram |
| rs206936                                | <i>NUDT3</i>    | 6   | 34,410,847         | A                | 5,507      | -0.0261 | 4.6E-01 | 0.0208                | 3.3E-08  | Opposite                    | Fram > Overall |

**2.3. SUPPLEMENTARY NOTE - FIGURES**

**Supplementary Note - Figure 1 The GIANT (Genetic Investigation of ANthropometric Traits) Consortium.** Geographical location of the 46 genome-wide association cohorts that participated in the stage 1 meta-analyses.

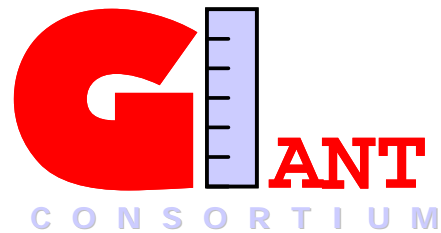

Genome-wide association data of **123,865** individuals from 46 studies

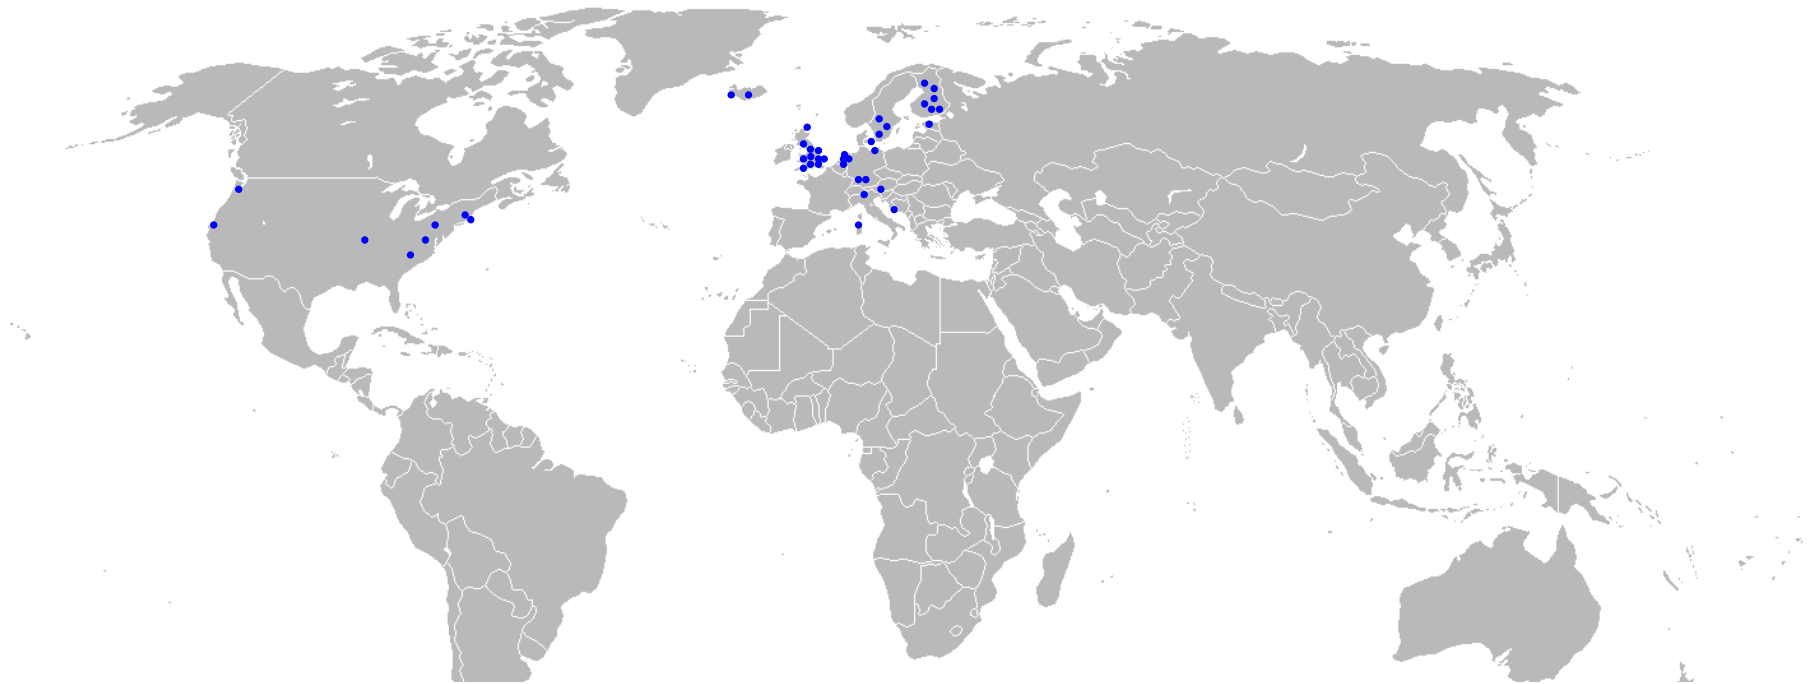

ADVANCE, AGES-Reykjavik, Amish, ARIC, B58C, BRIGHT, CASP1&2, CHS, CoLaus, deCODE, DGI, EGCUT, EPIC-Norfolk, ERF, Fenland, FHS, FramHS, FTC, FUSION, GenMets, GerMiFS1&2, KORA3&4, MICROS, MIGEN, NFBC, NHS, NSPHS, NTR-NESDA, ORCADES, PLCO, Procardis, Rotterdam, RUNMC, SardinIA, SASBAC, Search/UKOPS, SHIP, TwinsUK, WTCCC-CHD, WTCCC-UKBS, WTCCC-T2D



## 2.4. AUTHOR CONTRIBUTIONS

### **Steering committee (oversaw the project)**

Goncalo R Abecasis, Themistocles L Assimes, Inês Barroso, Sonja I Berndt, Michael Boehnke, Ingrid B Borecki, Panos Deloukas, Caroline S Fox, Timothy M Frayling, Leif C Groop, Talin Haritunians, Joel N Hirschhorn (chair), David J Hunter, Erik Ingelsson, Robert Kaplan, Ruth JF Loos (lead), Mark I McCarthy, Karen L Mohlke, Kari E North, Jeffrey R O'Connell, Leena Peltonen, David Schlessinger, David P Strachan, Unnur Thorsteinsdottir, Cornelia M van Duijn, H.-Erich Wichmann

### **Writing group (drafted and edited manuscript)**

Goncalo R Abecasis, Inês Barroso, Sonja I Berndt, Michael Boehnke, Joel N Hirschhorn, Erik Ingelsson (lead), Ruth JF Loos (lead), Mark I McCarthy, Keri L Monda, Kari E North, Elizabeth K Speliotes (chair), Unnur Thorsteinsdottir, Cristen J Willer

### **Discussion group (discussed and decided on phenotype modelling and analytic plans for meta-analyses)**

Inês Barroso, Sonja I Berndt, Iris M Heid, Joel N Hirschhorn, Erik Ingelsson (lead), Cecilia M Lindgren, Ruth JF Loos (lead), Mark I McCarthy, Keri L Monda, Lu Qi, Elizabeth K Speliotes (chair), Gudmar Thorleifsson, Cristen J Willer (lead)

### **Meta-analyses working group (performed stage 1 and stage 2 meta-analyses)**

Sonja I Berndt (lead), Erik Ingelsson (lead), Ruth JF Loos, Jian'an Luan, Elizabeth K Speliotes, Sailaja Vedantam, Cristen J Willer (chair)

### **Data preparation working group (prepared data from contributing cohorts for meta-analyses)**

Sonja I Berndt, Iris M Heid, Erik Ingelsson, Anne U Jackson, Hana Lango Allen, Cecilia M Lindgren, Ruth JF Loos (chair), Jian'an Luan, Reedik Mägi, Lu Qi, Joshua C Randall, Elizabeth K Speliotes (lead), Gudmar Thorleifsson, Sailaja Vedantam, Michael N Weedon, Eleanor Wheeler, Cristen J Willer, Thomas Winkler, Tsegaselassie Workalemahu

### **Gene-expression (eQTL) analyses**

Sonja I Berndt (lead), Anna Dixon, Danielle Greenwalt, Joel N Hirschhorn, Lee Kaplan, Liming Liang, Ruth JF Loos, Miriam Moffatt, Eric E Schadt, Elizabeth K Speliotes (chair), Valgerdur Steinthorsdottir, Gudmar Thorleifsson, Jing Hua Zhao

### **Polygene analyses**

Nilanjan Chatterjee, Karol Estrada, Timothy M Frayling, Michael E Goddard, Andrew W. Heath, Joel N Hirschhorn, Erik Ingelsson, Guillaume Lettre, Reedik Mägi, Massimo Mangino, Nicholas G. Martin, Mark I McCarthy (chair), Grant W. Montgomery, Dale R. Nyholt, Jeffrey R O'Connell, Ju-Hyun Park, Shaun Purcell, Albert Vernon Smith, Peter M Visscher (lead), Michael N Weedon, Cristen J Willer, Jian Yang

### **Pathway analyses**

Ayellet V Segrè, Elizabeth K Speliotes (chair), Valgerdur Steinthorsdottir, Gudmar Thorleifsson

### **Sex-specific analyses**

Sonja I Berndt, Tõnu Esko, Iris M Heid, Anne U Jackson, Tuomas O Kilpeläinen, Zoltán Kutalik, Shengxu Li, Cecilia M Lindgren, Ruth JF Loos, Reedik Mägi, Keri L Monda, Kari E North, Lu Qi, Joshua C Randall (chair), Valgerdur Steinthorsdottir, Gudmar Thorleifsson, Thomas Winkler (lead)

### **Extremes and obesity case-control analyses**

Sonja I Berndt, Nabila Bouatia-Naji, Mary F Feitosa, Stefan Gustafson, Joel N Hirschhorn, Erik Ingelsson (chair), Ruth JF Loos, Reedik Mägi, Mark I McCarthy, Keri L Monda, Lu Qi, André Scherag, Elizabeth K Speliotes, Eleanor Wheeler, Cristen J Willer, Tsegaselassie Workalemahu

### **2nd Signals analyses**

Sonja I Berndt, Ingrid B Borecki, Mary F Feitosa, Teresa Ferreira, Timothy M Frayling, Erik Ingelsson, Hana Lango Allen, Cecilia M Lindgren, Reedik Mägi, Karen L Mohlke, Joshua C Randall, Elizabeth K Speliotes, Michael N Weedon, Robert Weyant (lead), Eleanor Wheeler, Cristen J Willer (chair)

### **Gene-by-gene interaction analyses**

Timothy M Frayling, Cecilia M Lindgren, John RB Perry, Michael N Weedon (chair), Cristen J Willer, Andrew R Wood (lead)

### **Copy Number Variant analyses**

## Supplementary Note

Cecilia M Lindgren, Mark I. McCarthy, Steven A. McCarroll (Chair), James Nemesh, Elizabeth K. Speliotes, Benjamin F. Voight

### **Project design, management and coordination of contributing cohorts**

#### ***Stage 1 – Genome-wide association cohorts***

(ADVANCE) Carlos Iribarren, Thomas Quertermous; (AGES) Gudny Eiriksdottir, Vilmundur Gudnason, Tamara B Harris, Lenore J Launer; (Amish) Alan R Shuldiner; (ARIC) Eric Boerwinkle, Aaron R Folsom, Kari E North; (B58C-T1DGC & B58C-WTCCC) David P Strachan; (BRIGHT study) Morris J. Brown, Mark J Caulfield, John Conell, Patricia B Munroe; (CAPS) Henrik Grönberg, Erik Ingelsson; (CHS) Alice Arnold, Robert Kaplan; (CoLaus) Jacques S Beckmann, Sven Bergmann, Gérard Waeber; (deCODE) Kari Stefansson, Unnur Thorsteinsdottir; (DGI) Leif C Groop; (EPIC) Nicholas J Wareham; (ERF) Ben Oostra, Cornelia M van Duijn, M. Carola Zillikens; (EGCUT) Andres Metspalu; (Family Heart Study) Ingrid B Borecki; (FENLAND) Ruth JF Loos, Nicholas J Wareham; (FRAM) Larry D Atwood, L Adrienne Cupples, Caroline S Fox; (FTC) Jaakko Kaprio, Aila Rissanen; (FUSION) Michael Boehnke, Francis S Collins, Karen L Mohlke; (Genmets) Leena Peltonen, Veikko Salomaa; (GerMIFSI & GerMIFSI) Jeanette Erdmann, Christian Hengstenberg, Stefan Schreiber, Heribert Schunkert; (KORA S3 & KORA S4) Thomas Illig, H.-Erich Wichmann; (MICROS) Peter P Pramstaller; (MIGEN) Roberto Elosua, Sekar Kathiresan, Olle Melander, Christopher J O'Donnell, Veikko Salomaa, David S Siscovick, Benjamin F Voight; (NFB1966) Marjo-Riitta Jarvelin, Aimo Ruokonen; (NHS) Frank B Hu, David J Hunter; (NPSHS) Ulf Gyllenstein; (NTRNESDA) Dorret I Boomsma, Brenda W Penninx; (ORCADES) James F Wilson, Alan F Wright; (PLCO) Sonja I Berndt, Stephen J Chanock, Richard B Hayes; (PROCARDIS) Hugh Watkins; (RS-I) Albert Hofman, André G Uitterlinden, Cornelia M van Duijn, Jacqueline C Witteman, M. Carola Zillikens; (RUNMC) Katja K Aben, Martin den Heijer, Lambertus Kiemeneij; (SardiNIA) Goncalo R Abecasis, David Schlessinger, Manuela Uda; (SASBAC) Per Hall, Erik Ingelsson; (T2D-WTCCC) Timothy M Frayling, Andrew T Hattersley, Cecilia M Lindgren, Mark I McCarthy; (TwinsUK) Nicole Soranzo, Tim D Spector; (WTCCC-UKBS) Willem H Ouwehand; (VIS) Igor Rudan; (WTCCC-CAD) Alistair S Hall, Nilesh J Samani

#### ***Stage 2 – de novo replication cohorts***

(BCG) Yoav Ben-Shlomo, George Davey Smith; (BESCS/ BEPOC) Heiko Krude; (Botnia PPP) Leif C Groop, Bo Isomaa, Tiinamaija Tuomi; (BWHHS) Shah Ebrahim, Debbie A Lawlor; (DAPOC) Thomas Reinehr; (DESIR) Beverley Balkau, Philippe Froguel, Michel Marre; (DIAGEN) Peter Schwarz; (EPIC-Norfolk) Kay-Tee Khaw, Nicholas J Wareham; (EPIC-Potsdam) Heiner Boeing; (Essen/Marburg) Winfried Rief; (EGCUT) Andres Metspalu; (FINRISK97) Leena Peltonen, Veikko Salomaa; (FUSION) Richard N Bergman, Thomas A. Buchanan, Jaakko Tuomilehto, Timo T Valle; (GINI/LISA) Joachim Heinrich; (HUNT) Kristian Hveem, Kristian Midthjell; (Inter99) Torben Hansen, Torben Jørgensen, Oluf Pedersen, Daniel R Witte; (KORA-S2, 3 & 4) Annette Peters; (METSIM) Markku Laakso; (NFB86) Philippe Froguel, Marjo-Riitta Jarvelin; (OBB) Fredrik Karpe; (USCS) Martin Wabitsch

#### ***Stage 2 – in silico replication cohorts***

(BHS) John P Beilby, Alan L James, Lyle J Palmer; (Corogene) Markku S Nieminen, Leena Peltonen; (Essen Obesity Study) Johannes Hebebrand, Anke Hinney; (EGCUT) Andres Metspalu; (Family Heart Study) Ingrid B Borecki; (FINGESTURE) Heikki V Huikuri, Jean-Claude Tardif; (French Obesity CC) Beverley Balkau, Philippe Froguel, Sophie Visvikis-Siest; (GOOD) Claes Ohlsson; (HYPERGENES) Fabio Macciardi; (YFS) Mika Kähönen, Terho Lehtimäki, Olli Raitakari, Jorma Viikari; (LISA) Chih-Mei Chen, Joachim Heinrich; (MGS) Pablo V Gejman, Douglas F Levinson; (NHS) Frank B Hu, David J Hunter; (RS-II) Albert Hofman, André G Uitterlinden, Cornelia M van Duijn, Jacqueline C Witteman, M. Carola Zillikens; (SCOOP-UK) I. Sadaf Farooqi, Stephen O'Rahilly; (Sorbs) Michael Stumvoll, Anke Tönjes; (WGHS) Paul M Ridker

### **Phenotyping of contributing cohorts**

#### ***Stage 1 – Genome-wide association cohorts***

(ADVANCE) Devin Absher, Themistocles L Assimes, Joshua W Knowles; (Amish) Mao Fu; (ARIC) Eric Boerwinkle, Aaron R Folsom; (B58C-T1DGC & B58C-WTCCC) David P strachan; (BRIGHT study) Mark J Caulfield, Morris J Brown, John Conell; (CAPS) Henrik Grönberg, Fredrik Wiklund, Jianfeng Xu; (CHS) Alice Arnold, Robert Kaplan; (CoLaus) Gérard Waeber; (deCODE) G. Bragi Walters; (DGI) Peter Almgren, Leif C Groop, Martin Ridderstråle; (ERF) Cornelia M van Duijn; (EGCUT) Helene Alavere; (Family Heart Study) Ingrid B Borecki, Mary F Feitosa, Shamika Ketkar; (FENLAND) Ruth JF Loos, Nicholas J. Wareham; (FRAM) Caroline S Fox; (FTC) Kirsi Pietiläinen; (FUSION) Heather M Stringham; (Genmets) Antti Jula, Seppo Koskinen, Veikko Salomaa; (GerMIFSI & GerMIFSI) Christian Hengstenberg, Stefan Schreiber, H.-Erich Wichmann; (KORA S3 & KORA S4) Iris M Heid, Thomas Meitinger; (MICROS) Maurizio F Facheris, Irene Pichler; (MIGEN)

## Supplementary Note

Veikko Salomaa; (NFBC1966) Paul Elliott, Anna-Liisa Hartikainen, Marjo-Riitta Jarvelin, Jaana Laitinen, Anneli Pouta, Aimo Ruokonen, Markku Savolainen, Paavo Zitting; (NHS) Frank B Hu, David J Hunter, Lu Qi; (NSPHS) Åsa Johansson; (NTRNESDA) Jan H Smit, Gonneke Willemsen; (ORCADES) Sarah H Wild, Alan F Wright; (PLCO) Sonja I Berndt; (Procardis) Hugh Watkins; (RS-I) Albert Hofman, Cornelia M van Duijn, Jacqueline C Witteman; (SardiNIA) Manuela Uda; (SASBAC) Per Hall, Jianjun Liu; (SHIP) Stephan B Felix, Ulrich John, Sabine Schipf; (T2D-WTCCC) Timothy M Frayling, Andrew T Hattersley, Mark I McCarthy; (TwinsUK) Massimo Mangino, Tim D Spector; (VIS) Ivana Kolcic, Rosanda Mulic, Ozren Polasek, Igor Rudan, Lina Zgaga; (WTCCC-CAD) Anthony J Balmforth

### ***Stage 2 – de novo replication cohorts***

(BESCS/BEPOC) Susanna Wiegand; (Botnia PPP) Peter Almgren, Leif C Groop, Bo Isomaa, Tiinamaija Tuomi; (DESIR) Beverley Balkau, Stefan Gaget, Olivier Lantieri; (DIAGEN) Stefan R Bornstein, Jürgen Gräßler, Barbara Ludwig, Peter Schwarz; (EPIC-Norfolk) Robert N Luben; (EGCUT) Helene Alavere; (FINRISK97) Aki S Havulinna, Pekka Jousilahti, Veikko Salomaa, Kaisa Silander; (FUSION) Leena Kinnunen, Jouko Saramies; (GINI/LISA) Peter Rzehak; (HUNT) Kirsti Kvaloy, Carl GP Platou; (Inter99) Torben Hansen, Torben Jørgensen, Oluf Pedersen, Daniel R Witte; (KORA-S2, 3 & 4) Christian Gieger; (METSIM) Johanna Kuusisto; (NFBC86) Paul Elliott, Anna-Liisa Hartikainen, Marjo-Riitta Jarvelin, Jaana Laitinen, Anneli Pouta; (OBB) Fredrik Karpe; (USCS) Pamela Fischer-Posovszky

### ***Stage 2 – in silico replication cohorts***

(BHS) John P Beilby, Alan L James; (Corogene) Juha Sinisalo; (EGCUT) Helene Alavere; (Family Heart Study) Ingrid B Borecki, Mary F Feitosa, Shamika Ketkar; (FINGESTURE) Heikki V Huikuri; (French Obesity CC) Beverley Balkau, Alexandra IF Blakemore; (GOOD) John-Olov Jansson, Mattias Lorentzon, Claes Ohlsson; (HBCS) Johan G Eriksson, Eero Kajantie; (HYPERGENES) Maria TS Alibrandi, Cristina Barlassina, Francesco P Cappuccio, Chiara Lanzani, Fabio Macciardi, Paolo Manunta; (YFS) Mika Kähönen, Terho Lehtimäki, Olli Raitakari, Jorma Viikari; (MGS) Pablo V Gejman, Alan R Sanders; (NHS) Frank B Hu, David J Hunter, Lu Qi; (RS-II) Albert Hofman, Cornelia M van Duijn, Jacqueline C Witteman; (SCOOP-UK) I. Sadaf Farooqi; (Sorbs) Peter Kovacs, Anke Tönjes

## **Genotyping of contributing cohorts**

### ***Stage 1 – Genome-wide association cohorts***

(ADVANCE) Devin Absher, Themistocles L Assimes, Joshua W Knowles; (Amish) Alan R. Shuldiner; (ARIC) Eric Boerwinkle; (B58C-T1DGC & B58C-WTCCC) Wendy L McArdle; (CHS) Yii-Der Ida Chen, Talin Haritunians; (EPIC) Inês Barroso, Ruth JF Loos, Manjinder S Sandhu; (EGCUT) Mari Nelis; (Family Heart Study) Ingrid B Borecki, Richard H Myers, Qunyuan Zhang; (FENLAND) Jian'an Luan; (FRAM) Larry D Atwood; (FUSION) Lori L Bonnycastle; (Genmets) Leena Peltonen; (MICROS) Andrew A Hicks; (NFBC1966) Paul Elliott, Nelson Freimer, Anna-Liisa Hartikainen, Marjo-Riitta Jarvelin, Mark I McCarthy, Leena Peltonen, Paavo Zitting; (NHS) Frank B Hu, David J Hunter, Peter Kraft, Lu Qi; (NPSHS) Wilmar Igl, Åsa Johansson; (NTRNESDA) Eco JC Geus, Jouke-Jan Hottenga; (ORCADES) Harry Campbell; (PLCO) Stephen J Chanock, Kevin B Jacobs; (PROCARDIS) Robert Clarke, Anuj Goel; (RS-I) Karol Estrada, Marjolein J Peters, Fernando Rivadeneira, André G Uitterlinden, Joyce BJ van Meurs; (SardiNIA) Fabio Busonero; (SHIP) Georg Homuth, Henri Wallaschofski; (T2D-WTCCC) Amanda J Bennett, Christopher J Groves, Neelam Hassanali, Cecilia M Lindgren, Mark I McCarthy, Nigel W Rayner, Neil R Robertson; (TwinsUK) Massimo Mangino, Nicole Soranzo; (WTCCC-UKBS) Jonathan Stephens; (VIS) Caroline Hayward

### ***Stage 2 – de novo replication cohorts***

(BCG) Ian NM Day; (BESCS/ BEPOC) Heike Biebermann; (Botnia PPP) Candace Guiducci, Brian Thomson; (BWHHS) Ian NM Day; (DESIR) Nabila Bouatia-Naji, Vincent Vatin; (DIAGEN) Michael R Erdos; (EPIC-Norfolk) Robert N Luben; (Essen Obesity Trios) Susann Scherag, Carla IG Vogel; (EGCUT) Maris Teder-Laving; (FINRISK97) Candace Guiducci, Brian Thomson; (HUNT) Amy J Swift; (Inter99) Anette P Gjesing, Torben Hansen, Oluf Pedersen, Camilla Sandholt; (KORA-S2, 3 & 4) Harald Grallert; (METSIM) Mario A Morcken; (NFBC86) Alexandra IF Blakemore, Nabila Bouatia-Naji, Paul Elliott, Anna-Liisa Hartikainen, Marjo-Riitta Jarvelin, Vincent Vatin; (OBB) Matt J Neville

### ***Stage 2 – in silico replication cohorts***

(BHS) Jennie Hui; (Corogene) Marja-Liisa Lokki, Leena Peltonen; (EGCUT) Mari Nelis; (Family Heart Study) Ingrid B Borecki, Richard H Myers, Qunyuan Zhang; (GOOD) John-Olov Jansson, Mattias Lorentzon, Claes Ohlsson; (HYPERGENES) Cristina Barlassina, Francesco P Cappuccio, Fabio Macciardi, Paolo Manunta; (YFS) Johannes Kettunen, Niina Pellikka; (MGS) Jubao Duan, Pablo V Gejman, Alan R Sanders; (NHS) Frank B Hu, David J Hunter, Peter Kraft, Lu Qi; (RS-II)

## Supplementary Note

Karol Estrada, Marjolein J Peters, Fernando Rivadeneira, André G Uitterlinden, Joyce BJ van Meurs; (SCOOP-UK) Inês Barroso, Eleanor Wheeler; (Sorbs) Peter Kovacs; (WGHS) Daniel I Chasman, Guillaume Paré, Alex N Parker

### **Analyses of contributing cohorts**

#### ***Stage 1 – Genome-wide association cohorts***

(ADVANCE) Devin Absher, Themistocles L Assimes, Joshua W Knowles; Lindsay L. Waite; (AGES) Thor Aspelund, Albert Vernon Smith; (Amish) Jeffrey R O'Connell; (ARIC) Keri L Monda, Kari E North; (B58C-T1DGC & B58C-WTCCC) David P Strachan; (BRIGHT study) Toby Johnson; (CAPS) Erik Ingelsson, Fredrik Wiklund, Jianfeng Xu; (CHS) Nicole L Glazer, Barbara McKnight; (CoLaus) Toby Johnson, Zoltán Kutalik, Diana Marek; (deCODE) Valgerdur Steinthorsdottir, Gudmar Thorleifsson; (DGI) Elizabeth K Speliotes, Sailaja Vedantam; (EPIC) Ruth JF Loos, Ken K Ong, Jing Hua Zhao; (ERF) Eleanor Wheeler, Najaf Amin, Cornelia M van Duijn, Sophie van Wingerden, M. Carola Zillikens; (EGCUT) Tõnu Esko, Mari-Liis Tammesoo; (Family Heart Study) Mary F Feitosa, Shamika Ketkar, Richard H Myers, Qunyuan Zhang; (FENLAND) Jian'an Luan; (FRAM) L Adrienne Cupples, Nancy L Heard-Costa, Julius S Ngwa, Charles White; (FTC) Samuli Ripatti, Ida Surakka; (FUSION) Anne U Jackson, Cristen J Willer; (Genmets) Samuli Ripatti, Ida Surakka; (GerMIFSI & GerMIFSI) Inke R König, Michael Preuss, Andreas Ziegler; (KORA-S3 & KORA-S4) Iris M Heid, Claudia Lamina, Thomas Winkler; (MICROS) Åsa Johansson; (MIGEN) Elizabeth K Speliotes; (NFBC1966) Lachlan Coin, Marika Kaakinen, Ulla Sovio; (NHS) Peter Kraft, Lu Qi; (NSPHS) Åsa Johansson; (NTRNESDA) Jouke-Jan Hottenga; (ORCADES) Åsa Johansson, Veronique Vitart; (PLCO) Sonja I Berndt, Kevin B Jacobs; (Procardis) Hugh Watkins; (RS-I) Karol Estrada, Marjolein J Peters, Fernando Rivadeneira, André G Uitterlinden, Cornelia M van Duijn, M. Carola Zillikens; (SardiNIA) Goncalo R Abecasis, Elizabeth Jewell, Serena Sanna; (SASBAC) Erik Ingelsson; (SEARCH/UKOPS) Jonathan P Tyrer; (SHIP) Nele Friedrich, Georg Homuth; (T2D-WTCCC) Teresa Ferreira, Hana Lango Allen, Cecilia M Lindgren, Reedik Mägi, Andrew P Morris, Inga Prokopenko, Joshua C Randall, Nigel W Rayner, Neil R Robertson, Michael N Weedon, Andrew R Wood; (TwinsUK) Massimo Mangino, Nicole Soranzo; (VIS) Caroline Hayward, Åsa Johansson, Ozren Polasek; (WTCCC-CAD) Suzanne Rafelt, John R Thompson

#### ***Stage 2 – de novo replication cohorts***

(BCG) Nicholas J Timpson; (Botnia PPP) Elizabeth K Speliotes, Sailaja Vedantam; (BWHHS) Nicholas J Timpson; (DESIR) Nabila Bouatia-Naji, Christine Cavalcanti-Proença, Cecile Lecoeur; (DIAGEN) Tanya M Teslovich, Ryan Welch; (EGCUT) Reedik Mägi, Tõnu Esko, Mari-Liis Tammesoo; (EPIC-Norfolk) Ruth JF Loos; (EPIC-Potsdam) Eva Fisher; (Essen Obesity Trios) Tanja Boes; (Essen/Marburg) Ivonne Jarick; (FINRISK97) Kaisa Silander, Elizabeth K Speliotes, Sailaja Vedantam; (FUSION) Peter S Chines, Richard M Watanabe; (HUNT) Robert J Weyant; (Inter99) Anette P Gjesing, Camilla Sandholt; (KORA-S3 & KORA-S4) Volker Hoesel; (METSIM) Narisu Narisu, Laura J Scott; (NFBC86) Nabila Bouatia-Naji, Cecile Lecoeur, David Meyre

#### ***Stage 2 – in silico replication cohorts***

(BHS) Matthew N Cooper, Robert Lawrence; (Corogene) Niina Pellikka, Markus Perola; (Essen Obesity Study) André Scherag; (EGCUT) Tõnu Esko, Mari-Liis Tammesoo; (Family Heart Study) Mary F Feitosa, Shamika Ketkar, Richard H Myers, Qunyuan Zhang; (FINGESTURE) Philippe Goyette, Heikki V Huikuri, Guillaume Lettre, Jean-Claude Tardif; (French Obesity CC) Nabila Bouatia-Naji, Cecile Lecoeur, David Meyre; (GOOD) John-Olov Jansson, Mattias Lorentzon, Claes Ohlsson; (HYPERGENES) Cristina Barlassina; (YFS) Johannes Kettunen, Niina Pellikka; (LISA) Elisabeth Thiering; (MGS) Douglas F Levinson, Jianxin Shi; (NHS) Peter Kraft, Lu Qi; (RS-II) Karol Estrada, Marjolein J Peters, Fernando Rivadeneira, André G Uitterlinden, Cornelia M van Duijn, M. Carola Zillikens; (SCOOP-UK) Eleanor Wheeler; (Sorbs) Reedik Mägi, Inga Prokopenko; (WGHS) Daniel I Chasman

## 2.5. ACKNOWLEDGEMENTS

**ADVANCE (Atherosclerotic Disease, Vascular Function, and Genetic Epidemiology)** - The ADVANCE study was supported by the Donald W. Reynolds Foundation and the NHLBI (5R01HL087647).

**AGES (Age, Gene/Environment Susceptibility-Reykjavik Study)** - The Age, Gene/Environment Susceptibility Reykjavik Study has been funded by NIH contract N01-AG-12100, the NIA Intramural Research Program, Hjartavernd (the Icelandic Heart Association), and the Althingi (the Icelandic Parliament). The study is approved by the Icelandic National Bioethics Committee, (VSN: 00-063) and the Data Protection Authority. The researchers are indebted to the participants for their willingness to participate in the study.

**Amish HAPI Heart Study (Amish Heredity and Phenotype Intervention Heart Study)** - This work was supported by NIH research grants U01 HL72515, U01 GM074518, R01 HL088119, and U01 HL084756. Partial funding was also provided by the Mid-Atlantic Nutrition and Obesity Research Center (P30 DK072488).

**ARIC (Atherosclerosis Risk in Communities Study)** - The Atherosclerosis Risk in Communities Study is carried out as a collaborative study supported by National Heart, Lung, and Blood Institute contracts N01-HC-55015, N01-HC-55016, N01-HC-55018, N01-HC-55019, N01-HC-55020, N01-HC-55021, N01-HC-55022, R01HL087641, R01HL59367 and R01HL086694; National Human Genome Research Institute contract U01HG004402; and National Institutes of Health contract HHSN268200625226C. Infrastructure was partly supported by Grant Number UL1RR025005, a component of the National Institutes of Health and NIH Roadmap for Medical Research. The project described was supported by Grant Number UL1 RR 025005 from the National Center for Research Resources (NCRR), a component of the National Institutes of Health (NIH) and NIH Roadmap for Medical Research, and its contents are solely the responsibility of the authors and do not necessarily represent the official view of NCRR or NIH. The authors thank the staff and participants of the ARIC Study for their important contributions.

**B58C-T1DGC (British 1958 birth cohort Type 1 Diabetes Genetic Consortium controls)** - This research utilizes resources provided by the Type 1 Diabetes Genetics Consortium, a collaborative study sponsored by the National Institute of Diabetes and Digestive and Kidney Diseases (NIDDK), National Institute of Allergy and Infectious Diseases (NIAID), National Human Genome Research Institute (NHGRI), National Institute of Child Health and Human Development (NICHD), and Juvenile Diabetes Research Foundation International (JDRF) and supported by U01 DK062418. T1DGC GWAS data were deposited by the Diabetes & Inflammation Laboratory, Cambridge Institute for Medical Research, University of Cambridge (John Todd, Helen Stevens and Neil Walker) which is funded by the Juvenile Diabetes Research Foundation International, The National Institute for Health Research Cambridge Biomedical Research Centre and the Wellcome Trust (Strategic Award 079895).

**B58C-WTCCC & B58C replication set (R58) (British 1958 birth cohort (Type 1 Diabetes Genetic Consortium controls & Wellcome Trust Case Control Consortium controls))** - We acknowledge use of DNA and phenotypes from the British 1958 birth cohort collection, funded by the Medical Research Council grant G0000934 and the Wellcome Trust grant 068545/Z/02.

**BCG (Barry Caerphilly Growth Study)** - The original study was undertaken by the MRC Epidemiology Unit (Cardiff) funded by the Department of Health. The follow-up was funded by grants from the British Diabetic Association (1192) and British Heart Foundation (97020). We are very grateful to the subjects who participated in the original survey and who were willing to continue to be followed up in early adulthood. We thank the Bro Taf Health Authority for help with contacting the subjects, Carol Hopkinson for help with the fieldwork and data entry, and Dan Dedman for advice on the derived variables in the Barry Caerphilly Growth cohort data set.

**BESCS/BEPOC (Berlin School Children's Study/Berlin Paediatric Obese Cohort)** - We thank all the participants of this study. This work was supported by grants from the Federal Ministry of Education and Research (NGFN-plus: 01GS0825).

**BHS (Busselton Health Study)** - The 1994-1995 Busselton Health Survey was funded by Healthway, Western Australia and the Busselton Population Medical Research Foundation. The Busselton Health Studies are supported by the National Health and Medical Research Council of Australia and the Great Wine Estates Auctions. The BHS acknowledges the support of the Western Australian Genetic Epidemiology Resource and the Western Australian DNA Bank (both National Health and Medical Research Council of Australia Enabling Facilities).

**BRIGHT study (British Genetic of Hypertension (BRIGHT) study)** - The BRIGHT study is supported by the Medical Research Council of Great Britain (G9521010D) and the British Heart Foundation (PG/02/128). Genotyping was funded by the Wellcome Trust (grant number; 076113/B/04/Z) as part of The Wellcome Trust Case Control Consortium. This work forms part of the research themes contributing to the translational research portfolio of Barts and the London Cardiovascular Biomedical Research Unit which is supported and funded by the National Institute of Health Research. Toby Johnson was supported through a VIP award from the Wellcome Trust to Queen Mary University of London in the 2009/2010 academic year. The BRIGHT study is extremely grateful to all the patients who participated in the study and the BRIGHT nursing team.

**BWHHS (British Women's Heart and Health Study)** - The British Women's Heart & Health Study receives core funding from the UK Department of Health Policy Research Programme and the British Heart Foundation. The study co-directed by Professor Shah Ebrahim, Professor Peter Whincup, Dr Goya Wannamethee together with Dr Debbie A Lawlor. We thank Carol Bedford, Alison Emerton, Nicola Frecknall, Karen Jones, Rita Patel, Mark Taylor and Katherine Wornell for collecting and entering data, all of the general practitioners and their staff who have supported data collection, and the women who have participated in the study. The views expressed in the publication are those of the authors and not necessarily those of the Department of Health.

**CAD-WTCCC (WTCCC Coronary Artery Disease cases)** - Collection of the CAD-WTCCC cases (BHF Family Heart Study) was funded by the British Heart Foundation and the Medical Research Council and genotyping by the Wellcome Trust as part of the WTCCC. We thank the members of the BHF Family Heart Study Research Group for recruitment. NJS holds a personal chair supported by the BHF and also holds a UK NIHR Senior Investigator Award.

**CAPS (Cancer Prostate in Sweden)** - The CAPS study was supported by grants from the Swedish Research Council, the Swedish Cancer Society, and the National Cancer Institute. E.I. was supported by grants from the Swedish Research Council, the Swedish Heart-Lung Foundation, the Swedish Society of Medicine, the Swedish Foundation for Strategic Research, and the Royal Swedish Academy of Science while working with this article.

**CHS (Cardiovascular Health Study)** - The CHS research reported in this article was supported by contract numbers N01-HC-85079 through N01-HC-85086, N01-HC-35129, N01 HC-15103, N01 HC-55222, N01-HC-75150, N01-HC-45133, grant numbers U01 HL080295 and R01 HL087652 from the National Heart, Lung, and Blood Institute, 1R01AG031890, with additional contribution from the National Institute of Neurological Disorders and Stroke. A full list of principal CHS investigators and institutions can be found at <http://www.chs-nhlbi.org/pi.htm>. DNA handling and genotyping was supported in part by National Center for Research Resources grant M01RR00425 to the Cedars-Sinai General Clinical Research Center Genotyping core, National Institute of Diabetes and Digestive and Kidney Diseases grant DK063491 to the Southern California Diabetes Endocrinology Research Center.

**CoLaus (Cohorte Lausannoise)** - The CoLaus study received financial contributions from GlaxoSmithKline, the Faculty of Biology and Medicine of Lausanne, and the Swiss National Science Foundation (33CSCO-122661). The authors thank Peter Vollenweider, Vincent Mooser and Dawn Waterworth, Co-PIs of the CoLaus study. Special thanks to Murielle Bochud, Yolande Barreau, Mathieu Firmann, Vladimir Mayor, Anne-Lise Bastian, Binasa Ramic, Martine Moranville, Martine Baumer, Marcy Sagette, Jeanne Ecoffey and Sylvie Mermoud for data collection. JSB is supported by the Centre Hospitalier Universitaire Vaudois and the University of Lausanne, Switzerland, the Swiss National Science Foundation (grants nb 310000-112552) and the European Union HEALTH-F4-2007-201550 HYPERGENES grant. SB is supported by the Giorgi-Cavaglieri Foundation, the Swiss National Science Foundation (grant 3100AO-116323/1), the Leenaards Foundation, the European Union HEALTH-F4-2007-201550 HYPERGENES grant and the Swiss Institute of Bioinformatics.

**Corogene (COROGENE - STUDY Genetic Predisposition of Coronary Heart Disease in Patients Verified with Coronary Angiogram)** - Finnish Foundation for Cardiovascular Research, Academy of Finnish SALVE-program PUBGENSENS grant no 10404.

**Datteln (DAPOC)** - We thank all the participants of this study. This work was supported by grants from the Federal Ministry of Education and Research (NGFN-plus: 01GS0823). We thank all members of field staffs who were involved in the planning and conduct of the GINI.

**deCODE (deCODE genetics)** - deCODE authors would like to thank participants in deCODE cardiovascular- and obesity studies and collaborators for their cooperation. We would also like to acknowledge the staff at the Clinical Research Centre (Iceland) and the deCODE Genetics biological materials and genotyping facilities for their work. The research performed at deCODE

## Supplementary Note

Genetics was part funded through the European Community's Seventh Framework Programme (FP7/2007-2013), ENGAGE project, grant agreement HEALTH-F4-2007- 201413.

**DESIR (Data from the Epidemiological Study on the Insulin Resistance Syndrome)** - We thank Marion Marchand for genotyping support, Sophie Gallina for bioinformatics support and Christian Dina for statistical advice. We acknowledge funding by the Contrat Plan Etat Région entitled Genetic dissection of polygenic obesity using GWA approach and the Fond Européen pour le Développement Régional. The DESIR Study Group is: INSERM CESP U1018: B. Balkau, M.A. Charles P. Ducimetière, and E. Eschwège; INSERM U367: F. Alhenc-Gelas; CHU D'Angers: Y. Gallois and A. Girault; Bichat Hospital: F. Fumeron and M. Marre; CHU Rennes: F Bonnet; CNRS UMR8090, LILLE: P Froguel; Medical Examination Services: Alençon, Angers, Caen, Chateauroux, Cholet, Le Mans, and Tours; Research Institute for General Medicine: J. Cogneau; General practitioners of the region; Cross-Regional Institute for Health: C. Born, E. Caces, M. Cailleau, J.G. Moreau, F. Rakotozafy, J. Tichet, O Lantieri, and S. Vol. The D.E.S.I.R. study has been supported by INSERM contracts with CNAMTS, Lilly, Novartis Pharma and Sanofi-Aventis; by INSERM (Réseaux en Santé Publique, Interactions entre les déterminants de la santé), Cohortes Santé TGIR, the Association Diabète Risque Vasculaire, the Fédération Française de Cardiologie, La Fondation de France, ALFEDIAM, ONIVINS, Ardix Medical, Bayer Diagnostics, Becton Dickinson, Cardionics, Merck Santé, Novo Nordisk, Pierre Fabre, Roche, Topcon.

**DGI & Botnia PPP (Diabetes genetics initiative & Prediction and Prevention of Diabetes in the Botnia study)** - The Botnia (DGI) and PPP-Botnia studies have been supported by grants from Folkhälsan Research Foundation, Sigrid Juselius Foundation, Ministry of Education, Nordic Center of Excellence in Disease Genetics, Gyllenberg Foundation, Swedish Cultural Foundation in Finland, Finnish Diabetes Research Foundation, Foundation for Life and Health in Finland, Finnish Medical Society, Paavo Nurmi Foundation, Perklén Foundation, Ollqvist Foundation, Närpes Health Care Foundation, the Municipal Health Care Center and Hospital in Jakobstad, Health Care Centers in Vasa, Närpes and Korsholm. This work was also partially supported by NIH grant R01 DK075787 to JNH and by K23 DK080145 to EKS.

**DIAGEN (Diabetes Genetics)** - The DIABetes GENetic study is a large, prospective study of diabetes genetics that began in 1997 and seeks to understand the genetic causes of diabetes development. The presented study was supported by the Commission of the European Communities, Directorate C - Public Health and Risk Assessment, Health & Consumer Protection, Grant Agreement number - 2004310 and by the Dresden University of Technology Funding Grant, Med Drive. We are grateful to all of the patients who cooperated in this study and to their referring physicians and diabetologists in Saxony.

**DIAGRAM Consortium** - We are grateful to the DIABetes Genetics Replication And Meta-analysis (DIAGRAM) Consortium for providing summary statistics of their GWA study on risk of type 2 diabetes.

**EGCUT (Estonian Genome Center, University of Tartu)** - EGCUT received support from FP7 grants ((201413 ENGAGE, 212111 BBMRI, 205419 ECOGENE, 245536 OPENGENE). EGCUT also received targeted financing from Estonian Government SF0180142s08 and from the European Union through the European Regional Development Fund, in the frame of Centre of Excellence in Genomics. EGC authors want to acknowledge EGCUT personnel, especially Ms. Merli Hass. The genotyping of the EGCUT samples were performed in Estonian Biocentre Genotyping Core Facility, EGC authors want to acknowledge Mr. Viljo Soo for their contribution in that. EGCUT data analyzes were carried out in part in the High Performance Computing Center of University of Tartu.

**EPIC - Norfolk (European Prospective Investigation into Cancer and Nutrition - Norfolk)** - The EPIC Norfolk Study is funded by program grants from the Medical Research Council UK and Cancer Research UK.

**EPIC-Potsdam (European Prospective Investigation into Cancer and Nutrition - Potsdam)** - The recruitment phase of the EPIC-Potsdam Study was supported by the Federal Ministry of Science, Germany (01 EA 9401) and the European Union (SOC 95201408 05F02). The present study was supported by the German National Genome Research Net 'NGFNplus' (FKZ 01GS0823). Wolfgang Bernigau assisted with the statistical analyses.

**ERF (Erasmus Rucphen Family) (EUROSPAN)** - The study was supported by grants from The Netherlands Organisation for Scientific Research (NWO), Erasmus MC, the Centre for Medical Systems Biology (CMSB) and EUROSPAN (European Special Populations Research Network) FP6 STRP grant number 018947 (LSHG-CT-2006-01947). We are grateful to all general practitioners for their contributions, to Petra Veraart for her help in genealogy, Jeannette Vergeer for the supervision of the laboratory work and Peter Snijders for his help in data collection.

**Essen Obesity Study (Essen Case-Control GWAS and Essen Obesity Trio GWAS)** - We thank all the participants of this study. This work was supported by grants from the Federal Ministry of Education and Research (BMBF: 01GI0823; NGFN-plus: 01GS0820, 01KU0903) and the Deutsche Forschungsgemeinschaft (DFG; HE 1446/4-1).

**Essen Obesity Trios** - We thank all the participants of this study. This work was supported by grants from the Federal Ministry of Education and Research (BMBF: 01GI0823; NGFN-plus: 01GS0820, 01KU0903) and the Deutsche Forschungsgemeinschaft (DFG; HE 1446/4-1).

**Essen/Marburg - obese adults** - We thank all the participants of this study. This work was supported by grants from the Federal Ministry of Education and Research (01GP0209, 01GS0830 and 01GP0259).

**Fenland (Fenland Study)** - The Fenland Study is funded by the Wellcome Trust and the Medical Research Council, as well as by the Support for Science Funding programme and CamStrad. We are grateful to all the volunteers for their time and help, and to the General Practitioners and practice staff for help with recruitment. We thank the Fenland Study co-ordination team and the Field Epidemiology team of the MRC Epidemiology Unit for recruitment and clinical testing.

**FHS (Family Heart Study)** - The FHS is funded by a NHLBI grant 5R01HL08770003, and NIDDK grants 5R01DK06833603 and 5R01DK07568102.

**FinGesture (Finnish Genetic Study of Arrhythmic Events)** - We thank the study participants. We also thank Juhani Junttila, Kari Kaikkonen, and Marja-Leena Kortelainen for study concept and design, and data acquisition and interpretation. The FinGesture cohort is supported by the Sigrid Juselius Foundation (Helsinki, Finland) and the Council of Health of the Academy of Finland (Helsinki, Finland). Authors would like to thank John D. Rioux, Sylvain Foisy, and Gabrielle Boucher for their contributions to the design, implementation and analysis of the GWA study of the FinGesture cohort. In addition, we would like to acknowledge the support of the Montreal Heart Institute Foundation.

**FINRISK97** - This work was partially supported by NIH grant R01 DK075787 to JNH and by K23 DK080145 to EKS. Dr. Salomaa was supported by the Sigrid Juselius Foundation, Finnish Foundation for Cardiovascular Disease and Finnish Academy (grant number 129494).

**FRAM (Framingham Heart Study)** - This research was conducted in part using data and resources from the Framingham Heart Study of the National Heart Lung and Blood Institute of the National Institutes of Health and Boston University School of Medicine. The analyses reflect intellectual input and resource development from the Framingham Heart Study investigators participating in the SNP Health Association Resource (SHARe) project. This work was partially supported by the National Heart, Lung and Blood Institute's Framingham Heart Study (Contract No. N01-HC-25195) and its contract with Affymetrix, Inc for genotyping services (Contract No. N02-HL-6-4278). A portion of this research utilized the Linux Cluster for Genetic Analysis (LinGA-II) funded by the Robert Dawson Evans Endowment of the Department of Medicine at Boston University School of Medicine and Boston Medical Center.

**French Obesity Case-Control study** - We acknowledge funding by the Contrat Plan Etat Région entitled Genetic dissection of polygenic obesity using GWA approach and the Fond Européen pour le Développement Régional. We thank the STANISLAS cohort taking part of the Biological Ressources Center(BRC) "Interactions Gène Environnement en Physiopathologie CardioVasculaire"(IGE-PCV).The BRC IGE-PCV was supported by the INSERM, the "Université Henri Poincaré-Nancy 1",the "Région Lorraine" and the "Communauté Urbaine du Grand Nancy".

**FTC (Finnish Twin Cohort)** - Medical Research Fund of the Helsinki University Central Hospital, this project is supported by the European Commission under the programme 'Quality of Life and Management of the Living Resources' of 5th Framework Programme (no. QL2-CT-2002-01254). This research was supported through funds from The European Community's Seventh Framework Programme (FP7/2007-2013), ENGAGE Consortium, grant agreement HEALTH-F4-2007- 201413, Nordic Center of Excellence in Disease Genetics, Center of Excellence in Complex Disease Genetics of the Academy of Finland (grants 213506 and 129680). K.H. Pietiläinen was supported by grants from Yrjö Jahnsson, Jalmari and Rauha Ahokas, Biomedicum Helsinki and Novo Nordisk Foundations.

**FUSION (Finland-United States Investigation of NIDDM Genetics)** - Support for FUSION was provided by NIH grants DK062370 (to M.B.), DK072193 (to K.L.M.), T32 HG00040 (to T.M.T.), and K99HL094535 (to C.J.W.), and intramural project number 1Z01 HG000024 (to F.S.C.), and an ADA Mentor-Based Postdoctoral Fellowship grant to M.B. K.L.M. is a Pew Scholar for the Biomedical Sciences. Genome-wide genotyping was conducted by the Johns Hopkins University Genetic



## Supplementary Note

Resources Core Facility SNP Center at the Center for Inherited Disease Research (CIDR), with support from CIDR NIH contract no. N01-HG-65403.

**Genmets (Health 2000 / GENMETS substudy)** - This research was supported through funds from The European Community's Seventh Framework Programme (FP7/2007-2013), ENGAGE Consortium, grant agreement HEALTH-F4-2007- 201413, Nordic Center of Excellence in Disease Genetics, Center of Excellence in Complex Disease Genetics of the Academy of Finland (grants 213506, 129680, 129494).

**GerMIFS I and GerMIFS II (German Myocard Infarct Family Study I & II)** - BMBF funded project Atherogenomics (FKZ: 01GS0831) and Cardiogenics integrated project (LSH-2006-037593) of the European Union

**GINA/LISA (German Infant Nutritional Intervention / Influences of Lifestyle related Factors on the Immune System and the Development of Allergies in Childhood)** - This work was supported by the „Kompetenznetz Adipositas“ (Competence Network Obesity) and the national genome research net NGFN-plus funded by the Federal Ministry of Education and Research (FKZ: 01GI0826, NGFN-plus: 01GS0823). Personal and financial support by the Munich Center of Health Sciences (MC Health) which contributed to this research is gratefully acknowledged. The study team wishes to acknowledge the following: Helmholtz Zentrum Muenchen - German Research Center for Environment and Health, Institute of Epidemiology, Neuherberg (Wichmann HE, Heinrich J, Illig T, Klopp N, Tiesler C, Sausenthaler S, Rzehak P); Department of Pediatrics, University of Leipzig (Herbarth O, Borte M); Department of Pediatrics, Marien-Hospital, Wesel (Berdel D, von Berg A); Bad Honnef (Schaaf B); Department of Human Exposure Research and Epidemiology, Helmholtz Centre for Environmental Research (UFZ), Leipzig (Lehmann I); IUF-Institut für Umweltmedizinische Forschung, Düsseldorf (Krämer); Department of Pediatrics, Technical University, Munich (Bauer CP), Department of Pediatrics, LMU München (Koletzko S).

**GOOD (Gothenburg Osteoporosis and Obesity Determinants Study)** - Financial support was received from the Swedish Research Council, the Swedish Foundation for Strategic Research, the ALF/LUA research grant in Gothenburg, the Lundberg Foundation, the Emil and Vera Cornell Foundation, the Torsten and Ragnar Söderberg's Foundation, Petrus and Augusta Hedlunds Foundation, the Västra Götaland Foundation, the Göteborg Medical Society, and the Sahlgrenska Center for Cardiovascular and Metabolic Research (CMR, no. A305: 188), which is supported by the Swedish Foundation for Strategic Research. Support was also provided by the Swedish Medical Research Council (K2010-54X-09894-19-3, K2010-54X-09894-19-3, 2006-3832).

**HBCS (Helsinki Birth Cohort Study)** - Helsinki Birth Cohort Study has been supported by grants from Academy of Finland (project numbers 114382, 126775, 127437, 129255, 129306, 130326, 209072, 210595, 213225, 216374) , Finnish Diabetes Research Society, Finnish Foundation for Pediatric Research, Folkhälsan Research Foundation, Juho Vainio Foundation, Novo Nordisk Foundation, Finska Läkaresällskapet, Päivikki and Sakari Sohlberg Foundation, Signe and Ane Gyllenberg Foundation, Yrjö Jahnsson Foundation.

**HUNT:** Nord-Trøndelag Health Study (The HUNT Study) is a collaboration between the HUNT Research Centre (Faculty of Medicine, Norwegian University of Science and Technology NTNU), Nord-Trøndelag County Council and The Norwegian Institute of Public Health

**HYPERGENES** - HYPERGENES (European Network for Genetic-Epidemiological Studies: building a method to dissect complex genetic traits, using essential hypertension as a disease model) is a Large Cooperative Project funded by EU within the FP7 (HEALTH-F4-2007-201550). To HYPERGENES consortium took part: [1] University of Milano and Fondazione Filarete with Daniele Cusi, Project Coordinator, Fabio Macchiardi co-PI, Cristina Barlassina, Erika Salvi, Cristian Cosentino, Sara Lupoli, Federica Torri, Maurizio Marconi, Gianna Petrini, Vincenzo Toschi, Simona Sitia, Giancarlo Mariotti, Maurizio Turiel. [2] University of Leuven, Division of Hypertension and Cardiovascular Rehabilitation, Department of Cardiovascular Diseases, with Robert Fagard, Yu Jin, Tatiana Kuznetsova, Tom Richart, Jan A. Staessen, and Lutgarde Thijs. [3] Jagiellonian University Medical College, Krakow, with Kalina Kawecka-Jaszcz, Katarzyna Stolarz-Skrzypek, Agnieszka Olszanecka, Wiktoria Wojciechowska, Małgorzata Kloch-Badełek. [4] IBM Israel – Science and Technology LTD, with Amnon Shabo, Ariel Frakash, Simona Cohen, Boaz Carmeli, Dan Pelleg, Michal Rosen-Zvi, Hani Neuvirth-Telem. [5] I.M.S. – Istituto di Management Sanitario S.r.l., Milan, with Pietro Conti, Costanza Conti, Mariella D’Alessio. [6] Institute of Internal Medicine, Siberian Branch of Russian Academy of Medical Science, Novosibirsk, with Yuri Nikitin, Galina Simonova, Sofia Malyutina, Elena Pello. [7] Imperial College of Science, Technology and Medicine, with Paolo Vineis and Clive J Hoggart. [8] INSERM – Institut National de la Santé et de la Recherche Médicale

## Supplementary Note

U772, with Xavier Jeunemaitre, Pierre-François Plouin, Michel Azizi. [9] University of Warwick. Cardiovascular Medicine & Epidemiology Group, Clinical Sciences Research Institute, with Francesco P Cappuccio, Michelle A Miller, Chen Ji, [10] Università degli Studi di Sassari-AOU. Hypertension and Cardiovascular Prevention Centre, with Nicola Glorioso, Giuseppe Argiolas, Francesca Fau, Silvia Pitzoi, Emanuela Bulla, Roberta Zaninello, Patrizia Bulla, Simone Fadda, Gianclaudia Cappai, Siria Motroni, Chiara Maria Troffa. [11] STMICROELECTRONICS SRL, with Tony Barbuzzi. [12] University of Lausanne. Department of Medical Genetics, with Carlo Rivolta, Jacques S. Beckmann, Zoltan Kutalik, Paola Benaglio, Sven Bergmann, Murielle Bochud, Diana Marek, and Peter Bastian. [13] Pharnext S.A.S., Paris, with Daniel Cohen and Ilya Chumakov. [14] Softeco Sismat Spa, Genova, with Enrico Morten. [15] Shanghai Institute of Hypertension, with Jiguang Wang and Li Yan. [16] Charles University in Prague. Department of Internal Medicine II, Pilsen, with Jan Filipovsky, Jitka Seidlerova, Otto Mayer Jr., Milena Dolejsova, Jana Hirmerova, Jana Strizova. [17] University of Padova, Department of Clinical and Experimental Medicine, with Edoardo Casiglia and Valérie Tikhonoff. [18] Medical University of Gdansk. Hypertension Unit, Department of Hypertension and Diabetology, with Krzysztof Narkiewicz, Marzena Chrostowska, Wojciech Sakiewicz, Michal Wojtowicz, Michal Hoffmann. [19] University Vita-Salute San Raffaele, with Paolo Manunta, Chiara Lanzani, Maria Teresa Sciarrone, Lorena Citterio, Laura Zagato, Giuseppe Bianchi. Regarding the present work, cases and controls were recruited within specific cohorts/networks: FLEMINGHO/EPOGH cohort (Coordinator J Staessen, contributors Units 2,3,6,16,17,18); Wandsworth Heart & Stroke Study (WHSS, Coordinator F Cappuccio, contributing Unit 9); Milano-Sassari cohort (coordinator D Cusi, contributors Units 1,10,19); SOPHIA cohort (coordinator N Glorioso, contributing Unit 10). [20] National Centre of Competence in Research Frontiers in Genetics, University of Geneva, with Patrick Descombes.

**Inter99 (A population-based primary prevention study on cardiovascular disease and type 2 diabetes)** - The Inter99 was initiated by Torben Jørgensen (PI), Knut Borch-Johnsen (co-PI), Hans Ibsen and Troels F. Thomsen. The steering committee comprises the former two and Charlotta Pisinger. The establishment of the cohort was financially supported by research grants from the Danish Research Council, The Danish Centre for Health Technology Assessment, Novo Nordisk Inc., Research Foundation of Copenhagen County, the Ministry of Internal Affairs and Health, The Danish Heart Foundation, The Danish Pharmaceutical Association, The Augustinus Foundation, The Ib Henriksen Foundation, and the Becket Foundation. The genotyping and genetic analyses of the present Inter99 initiative was funded by the Lundbeck Foundation Centre of Applied Medical Genomics for Personalized Disease Prediction, Prevention and Care (LUCAMP), and the Danish Diabetes Association.

**KORA studies (Cooperative Health Research in the Region of Augsburg, KOoperative Gesundheitsforschung in der Region Augsburg)** - We thank all study participants and would like to acknowledge the KORA (Cooperative Health Research in the Region of Augsburg) group. The KORA research platform was initiated and financed by the Helmholtz Center Munich, German Research Center for Environmental Health, which is funded by the German Federal Ministry of Education and Research (BMBF) and by the State of Bavaria. Part of this work was financed by the NIH subcontract from the Children's Hospital, Boston, US, (H.E.W., I.M.H, prime grant 1 R01 DK075787-01A1 to J.N.H.), the German National Genome Research Net NGFN2 and NGFNplus (01GS0823 to H.E.W), by MC Health - the Munich Center of Health Sciences as part of LMUinnovativ (H.E.W.), and by the Austrian GEN-AU-Programme GOLD to the Division of Genetic Epidemiology, Innsbruck Medical University. The LINUX platform for meta-analyses computations was funded by the Department of Epidemiology and Preventive Medicine at Regensburg University Medical Center.

**YFS (The Cardiovascular Risk in Young Finns Study)** - Academy of Finland (grant no. 117797, 121584 and 126925), the Social Insurance Institution of Finland, University Hospital Medical funds to Tampere, and Turku University Hospitals, the Finnish Foundation of Cardiovascular Research.

**METSIM (Metabolic Syndrome in Men)** - The METSIM study was funded by the Academy of Finland (grant no. 77299 and 124243)

**MGS (Molecular Genetics of Schizophrenia/NIMH Repository Control Sample)** - The Molecular Genetics of Schizophrenia project was carried out by 10 research sites and PIs: Pablo V. Gejman, Study Coordinator (NorthShore University Healthcare Research Institute, Evanston, IL), Douglas F. Levinson (Stanford University), Bryan J. Mowry (University of Queensland), Donald Black (University of Iowa), Robert Freedman (University of Colorado), C. Robert Cloninger (Washington University), Jeremy Silverman (Mt. Sinai Medical School), Nancy Buccola (Louisiana State University - New Orleans), William Byerley (University of California at San Francisco), and Farooq Amin (Emory University). This study was supported by NIH R01 grants (MH67257 to

## Supplementary Note

N.G.B., MH59588 to B.J.M., MH59571 to P.V.G., MH59565 to R.F., MH59587 to F.A., MH60870 to W.F.B., MH59566 to D.W.B., MH59586 to J.M.S., MH61675 to D.F.L., MH60879 to C.R.C., and MH81800 to P.V.G.), MH79469 to P.V.G., and MH79470 to D.F.L.), NARSAD (National Alliance for Research on Schizophrenia and Depression) Young Investigator Awards (to J.D. and A.R.S.), the Genetic Association Information Network (GAIN), the Walter E. Nichols, M.D., and Eleanor Nichols endowments, at Stanford University, and by The Paul Michael Donovan Charitable Foundation. Genotyping was carried out by the Genotyping and Analysis at the Broad Institute of Harvard and MIT (S. Gabriel and D.B.M.), which is supported by grant U54 RR020278 from the National Center for Research Resources. Genotyping of half of the control sample presented here was carried out with support from GAIN. The GAIN quality control team (G.R. Abecasis and J. Paschall) made important contributions to the project.

**MICROS (EUROSPAN)** - For the MICROS study, we thank the primary care practitioners Raffaella Stocker, Stefan Waldner, Toni Pizzocco, Josef Plangger, Ugo Marcadent and the personnel of the Hospital of Silandro (Department of Laboratory Medicine) for their participation and collaboration in the research project. In South Tyrol, the study was supported by the Ministry of Health and Department of Educational Assistance, University and Research of the Autonomous Province of Bolzano and the South Tyrolean Sparkasse Foundation.

**MIGEN (Myocardial Infarction Genetics Consortium)** - National Heart, Lung, and Blood Institute's STAMPEED genomics research program (R01 HL087676) and the National Center for Research Resources (U54 RR020278).

**NBS-WTCCC (WTCCC National Blood Service donors)** - We acknowledge use of DNA from The UK Blood Services/Wellcome Trust collection of Common Controls (UKBS/WT collection), funded by the Wellcome Trust grant 076113/C/04/Z and by the National Institute for Health research. The collection was established as part of the Wellcome Trust Case Control Consortium.

**NFBC 1966 and 1986 studies (Northern Finland Birth Cohorts)** - We thank Professor Paula Rantakallio (launch of NFBC1966 and initial data collection), Ms Sarianna Vaara (data collection), Ms Tuula Ylitalo (administration), Mr Markku Koiranen (data management), Ms Outi Tornwall and Ms Minttu Jussila (DNA biobanking). Financial support was received from the Academy of Finland (project grants 104781, 120315, 129269, and Center of Excellence in Complex Disease Genetics), University Hospital Oulu, Biocenter, University of Oulu, Finland (75617), the European Commission (EURO-BLCS, Framework 5 award QLG1-CT-2000-01643), NHLBI grant 5R01HL087679-02 through the STAMPEED program (1RL1MH083268-01), NIH/NIMH (5R01MH63706:02), ENGAGE project and grant agreement HEALTH-F4-2007-201413, and the Medical Research Council, UK (Grants G0500539, G0600331, PrevMetSyn). The DNA extractions, sample quality controls, biobank up-keeping and aliquotting were performed in the National Public Health Institute, Biomedicum Helsinki, Finland and supported financially by the Academy of Finland and Biocentrum Helsinki. The funders had no role in study design, data collection and analysis, decision to publish, or preparation of the manuscript.

**NHS (The Nurses' Health Study)** - The NHS is funded by the grants (U01HG004399, DK58845, CA65725, CA87969, CA49449, CA67262, CA50385, 5U01CA098233, HL71981), and the Boston Obesity Nutrition Research Center (DK46200). We acknowledge the NHS participants for their contributions in making this study possible.

**NSPHS (Northern Sweden Population Health Study (EUROSPAN))** - The Northern Swedish Population Health Study (NSPHS) was funded by the Swedish Medical Research Council (Project Number K2007-66X-20270-01-3) and the Foundation for Strategic Research (SSF). NSPHS as part of EUROSPAN (European Special Populations Research Network) was also supported by European Commission FP6 STRP grant number 01947 (LSHG-CT-2006-01947). We are grateful for the contribution of district nurse Svea Hennix for data collection and Inger Jonasson for logistics and coordination of the health survey. Finally, we would like to thank all the participants from the community for their interest and willingness to contribute to this study.

**NTRNESDA (Netherlands Twin Register & the Netherlands Study of Depression and Anxiety)** - Funding support was provided by the Netherlands Scientific Organization (904-61-090, 904-61-193, 480-04-004, 400-05-717, Center for Medical Systems Biology (NWO Genomics), SPI 56-464-1419); Neuroscience Campus Amsterdam and the EMGO+ institute; the European Union (EU/WLRT-2001-01254), ZonMW (Geestkracht program, 10-000-1002), NIMH (R01 MH059160) and matching funds from participating institutes in NESDA and NTR. The genotyping of samples was provided through the Genetic Association Information Network (GAIN). The dataset(s) used for the analyses described in this manuscript were obtained from the database of Genotype and

## Supplementary Note

Phenotype (dbGaP) found at <http://www.ncbi.nlm.nih.gov/gap> through dbGaP accession number phs000020.v2.p1

**OBB (Oxford Biobank)** - The OBB study is funded by the NIHR Oxford Biomedical Research Centre

**ORCADES (Orkney Complex Disease Study (EUROSPAN))** - The Orkney Complex Disease Study (ORCADES) was supported by the Chief Scientist Office of the Scottish Government, the Royal Society and the European Union framework program 6 EUROSPAN project (contract no. LSHG-CT-2006-018947). DNA extractions were performed at the Wellcome Trust Clinical Research Facility in Edinburgh. We would like to acknowledge the invaluable contributions of Lorraine Anderson and the research nurses in Orkney, the administrative team in Edinburgh and the people of Orkney.

**PLCO (Prostate, Lung, Colorectal, and Ovarian Cancer Screening Trial)** - This research was supported by the Intramural Research Program of the Division of Cancer Epidemiology and Genetics and by contracts from the Division of Cancer Prevention, National Cancer Institute, NIH, DHHS. The authors thank Drs. Christine Berg and Philip Prorok of the Division of Cancer Prevention, National Cancer Institute, the screening center investigators and staff of the Prostate, Lung, Colorectal, and Ovarian (PLCO) Cancer Screening Trial, Mr. Tom Riley and staff at Information Management Services, Inc., Ms. Barbara O'Brien and staff at Westat, Inc., and the study participants for making this study possible.

**Procardis (Precocious Coronary Artery Disease (ProCARDIS))** - The Procardis consortium was funded by EC Sixth Framework Programme (Procardis: LSHM-CT- 2007- 037273) and AstraZeneca AB. RC, MF and HW are supported by the British Heart Foundation Centre for Research Excellence, Oxford; MF and HW acknowledge support from the Wellcome Trust; RC acknowledge support from the MRC; AH obtained support for this project from the Swedish Heart-Lung Foundation, the Swedish Medical Research Council (8691), the Knut and Alice Wallenberg Foundation, the Karolinska Institute and the Stockholm County Council (560183).

**QIMR Polygene** - We are grateful to the twins and their families for their generous participation in these studies. We would like to thank staff at the Queensland Institute of Medical Research: Dixie Statham, Ann Eldridge and Marlene Grace for sample collection, Anjali Henders, Megan Campbell, Lisa Bowdler, Steven Crooks and staff of the Molecular Epidemiology Laboratory for sample processing and preparation, Scott Gordon, Brian McEvoy, Belinda Cornes and Beben Benyamin for data QC and preparation, and David Smyth and Harry Beeby for IT support. We acknowledge funding from the Australian National Health and Medical Research Council (NHMRC grants 241944, 389875, 389891, 389892, 389938, 442915, 442981, 496739, 496688, 552485 and 613672), the U.S. National Institute of Health (grants AA07535, AA10248, AA014041, AA13320, AA13321, AA13326 and DA12854) and the Australian Research Council (ARC grant DP0770096).

**RS (The Rotterdam Study)** - The GWA study was funded by the Netherlands Organisation of Scientific Research NWO Investments (nr. 175.010.2005.011, 911-03-012), the Research Institute for Diseases in the Elderly (014-93-015; RIDE2), the Netherlands Genomics Initiative (NGI)/Netherlands Consortium for Healthy Aging (NCHA) project nr. 050-060-810. We thank Pascal Arp, Mila Jhamai, Dr Michael Moorhouse, Marijn Verkerk, and Sander Bervoets for their help in creating the GWAS database. The Rotterdam Study is funded by Erasmus Medical Center and Erasmus University, Rotterdam, Netherlands Organization for the Health Research and Development (ZonMw), the Research Institute for Diseases in the Elderly (RIDE), the Ministry of Education, Culture and Science, the Ministry for Health, Welfare and Sports, the European Commission (DG XII), and the Municipality of Rotterdam. The authors are very grateful to the participants and staff from the Rotterdam Study, the participating general practitioners and the pharmacists. We would like to thank Dr. Tobias A. Knoch, Luc V. de Zeeuw, Anis Abuseiris, and Rob de Graaf as well as their institutions the Erasmus Computing Grid, Rotterdam, The Netherlands, and especially the national German MediGRID and Services@MediGRID part of the German D-Grid, both funded by the German Bundesministerium fuer Forschung und Technology under grants #01 AK 803 A-H and # 01 IG 07015 G for access to their grid resources.

**RUNMC (The Nijmegen Bladder Cancer Study & The Nijmegen Biomedical Study)** - Collection of samples and data in the RUNMC study was funded in part by the European Commission (POLYGENE: LSHC-CT-2005) and Radboud University Nijmegen Medical Centre.

**SardiNIA** - We thank all of the volunteers who participated in the study, Monsignore Piseddu, Bishop of Ogliastra, the mayors and citizens of the Sardinian towns (Lanusei, Ilbono, Arzana, and Elini), the head of the Public Health Unit ASL4 for their volunteerism and cooperation, and team of

## Supplementary Note

physicians, nurses and the recruitment personnel. Funding was provided by the National Institute on Aging, NIH (contracts NO1-AG-1-2109 to the SardiNIA/ProgeNIA team; and contracts HG002651; HG005581; HL084729; MH084698 and 263-MA-410953 to the University of Michigan (G.R.A)). G.R.A. is a Pew Scholar for the Biomedical Sciences.

**SASBAC (Swedish And Singapore Breast Association Consortium)** - The SASBAC study was supported by funding from the Agency for Science, Technology and Research of Singapore (A\*STAR), the United States National Institute of Health (NIH) and the Susan G. Komen Breast Cancer Foundation.

**SCOOP-UK (Severe Childhood Onset Obesity Project United Kingdom)** - We acknowledge support of the Wellcome Trust, UK Medical Research Council and NIHR Cambridge Biomedical Research Centre. Inês Barroso acknowledges funding from the Wellcome Trust grant 077016/Z/05/Z, Cambridge NIHR Comprehensive Biomedical Research Centre and the MRC Centre for Obesity related Metabolic disease.

**SEARCH/UKOPS (Studies of Epidemiology and Risk factors in Cancer Heredity / UK Ovarian Cancer Population Study)** - SEARCH is funded by a programme grant from Cancer Research UK. We thank Jonathan Morrison, Honglin Song, Paul Pharoah and the SEARCH team. UKOPS is funded by a grant from the Eve Appeal. We thank Simon Gayther, Susan Ramus and the UKOPS team.

**SHIP (Study of Health in Pomerania)** - SHIP is part of the Community Medicine Research net of the University of Greifswald, Germany, which is funded by the Federal Ministry of Education and Research (grants no. 01ZZ9603, 01ZZ0103, and 01ZZ0403), the Ministry of Cultural Affairs as well as the Social Ministry of the Federal State of Mecklenburg-West Pomerania. Genome-wide data have been supported by the Federal Ministry of Education and Research (grant no. 03ZIK012) and a joint grant from Siemens Healthcare, Erlangen, Germany and the Federal State of Mecklenburg - West Pomerania. The SHIP authors are grateful to the contribution of Alexander Teumer, Florian Ernst, Anja Hoffmann, and Astrid Petersmann in generating the SNP data. The University of Greifswald is a member of the 'Center of Knowledge Interchange' program of the Siemens AG. Data analyses were further supported by the DIAB Core project of the German Network of Diabetes.

**Sorbs (Sorbs are self-contained population from Eastern Germany, European Descent)** - Dr Knut Krohn, Microarray Core Facility of the Interdisciplinary Centre for Clinical Research (IZKF), University of Leipzig, Germany; grants from the German Research Council (KFO-152 to Michael Stumvoll) and from IZKF (B27 to Michael Stumvoll, Peter Kovacs and Anke Tönjes). The research of Dr. Inga Prokopenko is funded in part through the European Community's Seventh Framework Programme (FP7/2007-2013), ENGAGE project, grant agreement HEALTH-F4-2007- 201413. Dr. Reedik Mägi from the Wellcome Trust Centre for Human Genetics, University of Oxford, UK for data handling for this study.

**T2D-WTCCC (WTCCC Type 2 Diabetes cases)** - Research funding for sample collection, genotyping and data analysis for the T2D-WTCCC and other cohorts for which the Oxford group had responsibility came from the British Diabetes Association, BDA Research, Diabetes UK, Oxford NIHR Biomedical Research Centre, European Commission (ENGAGE: HEALTH-F4-2007-201413; EURO DIA: LSHG-CT-2004-518153, Wellcome Trust (072960, 076113/B/04/Z, 076113/K/04/Z, 083270, 085301, 079557, 081682, 075491) UK Medical Research Council (G0000649, G0601261) and NIDDK (R01-DK-073490). In addition, Cecilia Lindgren is funded by WT086596/Z/08/Z (Wellcome Trust Research Career Development Fellowship); Reedik Mägi is funded by European Commission under the Marie Curie Intra-European Fellowship; Andrew Morris is funded by WT081682/Z/06/Z (Wellcome Trust Senior Research Fellowship) and Mark McCarthy receives personal funding from the Oxford NIHR Biomedical Research Centre.

**TwinsUK** - The study was funded by the Wellcome Trust; European Community's Seventh Framework Programme (FP7/2007-2013)/grant agreement HEALTH-F2-2008-ENGAGE and the European Union FP-5 GenomEUtwin Project (QLG2-CT-2002-01254) and Framework 6 Project EUroClot. The study also receives support from the National Institute for Health Research (NIHR) comprehensive Biomedical Research Centre award to Guy's & St Thomas' NHS Foundation Trust in partnership with King's College London We thank the staff from the TwinsUK, the DNA Collections and Genotyping Facilities at the Wellcome Trust Sanger Institute for sample preparation; Quality Control of the Twins UK cohort for genotyping (in particular Amy Chaney, Radhi Ravindrarajah, Douglas Simpkin, Cliff Hinds, and Thomas Dibling); Paul Martin and Simon Potter of the DNA and Genotyping Informatics teams for data handling; Le Centre National de Génotypage, France, led by Mark Lathrop, for genotyping; Duke University, North Carolina, USA, led by David Goldstein, for

## Supplementary Note

genotyping; and the Finnish Institute of Molecular Medicine, Finnish Genome Center, University of Helsinki, led by Aarno Palotie.

**USCS (Ulm School Children Study)** - We thank all the participants of this study. PFP is supported by the European Social Fund and by the Ministry Of Science, Research and the Arts Baden-Württemberg. This work was supported by grants from the Federal Ministry of Education and Research (NGFN-plus: 01GS0824)

**VIS (VIS and KORCULA (EUROSPAN))** - The studies in the Croatian islands were supported through the grants from the Medical Research Council UK to H.C., A.F.W. and I.R.; and Ministry of Science, Education and Sport of the Republic of Croatia to I.R. (number 216-1080315-0302). The authors collectively thank a large number of individuals for their individual help in organizing, planning and carrying out the field work related to the project and data management: Professor Pavao Rudan and the staff of the Institute for Anthropological Research in Zagreb, Croatia (organization of the field work, anthropometric and physiological measurements, and DNA extraction in Vis); Professor Ariana Vorko-Jovic and the staff and medical students of the Andrija Stampar School of Public Health of the Faculty of Medicine, University of Zagreb, Croatia (questionnaires, genealogical reconstruction and data entry); Dr Branka Salzer from the biochemistry lab Salzer, Croatia (measurements of biochemical traits); local general practitioners and nurses (recruitment and communication with the study population); and the employees of several other Croatian institutions who participated in the field work, including but not limited to the University of Rijeka, Croatia; Croatian Institute of Public Health; Institutes of Public Health in Split and Dubrovnik, Croatia. SNP Genotyping of the Vis samples was carried out by the Genetics Core Laboratory at the Wellcome Trust Clinical Research Facility, WGH, Edinburgh, Scotland

**WGHS (Women's Genome Health Study)** - The WGHS is funded by the Donald W. Reynolds Foundation (Las Vegas, NV), the Fondation LeDucq (Paris, France), the National Heart, Lung and Blood Institute (NHLBI; HL043851) and the National Cancer Institute (NCI; CA047988). Funding for genotyping and collaborative scientific support was provided by Amgen.

**2.6. COMPETING INTERESTS STATEMENT**

Inês Barroso and spouse own stock in Incyte Ltd and GlaxoSmithKline.

Joel N. Hirschhorn is a member of the Scientific Advisory Board, Correlagen, Inc. (disclosure but not a conflict of interest).

Volker Hoesel has received consultancy fees from GlaxoSmithKline, Lilly, Takeda. No other potential conflict of interest is reported.

Alex Parker is employed by Amgen.

Kari Stefansson, Valgerdur Steinthorsdottir, Gudmar Thorleifsson, Unnur Thorsteinsdottir, and G. Bragi Walters are employed by deCODE Genetics.
